# Supplementary material for: Receptor kinase FERONIA regulates flowering time in Arabidopsis
Source: BMC Plant Biol. 2020 Jan 16;20:26. doi: 10.1186/s12870-019-2223-y (PMC6966814; doi:10.1186/s12870-019-2223-y)
Supplement: Supplementary file 9 — Additional file 9: Table S1. Genes with significant (> 2-fold, p < 0.05) expression in fer-4 compare with WT as determined by RNA-seq anaylsis. [file 12870_2019_2223_MOESM9_ESM.xls]

## Sheet: fer4 total
Genes with significant (> 2-fold, p<0.05) expression in fer-4 compare with WT as determined by RNA-seq anaylsis.
Gene	logFC	PValue	FDR	fer-4_1_case_RPKM	fer-4_2_case_RPKM	fer-4_3_case_RPKM	Col-0_1_ctrl_RPKM	Col-0_2_ctrl_RPKM	Col-0_3_ctrl_RPKM	Primary Name	Description	GO:biological_process
AT1G01340	1.86735	2.62792e-36	9.54403e-35	7.65343	9.0608	9.21299	2.36152	2.70706	2.60902	CNGC10	Probable cyclic nucleotide-gated ion channel 10 [Source:UniProtKB/Swiss-Prot;Acc:Q9LNJ0]	ion channel activity|voltage-gated potassium channel activity|calmodulin binding|plasma membrane|integral component of plasma membrane|integral component of membrane|cyclic nucleotide binding|cAMP binding|cGMP binding|regulation of membrane potential
AT1G01560	4.75507	5.16661e-42	2.26644e-40	3.94122	4.72281	5.68134	0.128768	0.228538	0.229453	MPK11	Mitogen-activated protein kinase 11 [Source:UniProtKB/Swiss-Prot;Acc:Q9LMM5]	ATP binding|nucleus|kinase activity|MAP kinase activity|signal transduction|response to abscisic acid|protein binding|cytosol
AT1G01680	9.25002	2.94768e-70	2.77307e-68	18.7206	19.2007	23.8699	0.0440134	0	0	PUB54	U-box domain-containing protein 54 [Source:UniProtKB/Swiss-Prot;Acc:Q9LQ92]	ubiquitin-protein transferase activity|nucleus|response to stress|protein ubiquitination|ligase activity
AT1G02065	1.0697	0.035138	0.0798668	0.617303	0.416868	0.549431	0.292348	0.231221	0.321966	SPL8	Squamosa promoter-binding-like protein 8 [Source:UniProtKB/Swiss-Prot;Acc:Q8GXL3]	DNA binding|nucleus|cytoplasm|transcription, DNA-templated|regulation of transcription, DNA-templated|cell differentiation|metal ion binding|megasporogenesis|microsporogenesis|anther development
AT1G02230	1.96907	0.000139262	0.000564297	0.895529	1.9564	1.60408	0.415686	0.328761	0.189562	NAC004	NAC domain-containing protein 4 [Source:UniProtKB/Swiss-Prot;Acc:O81913]	DNA binding|nucleus|transcription, DNA-templated|regulation of transcription, DNA-templated|multicellular organism development|transcription factor activity, sequence-specific DNA binding
AT1G02390	1.20976	0.0170173	0.0426708	0.407973	0.657752	0.84752	0.307787	0.155658	0.407338	GPAT2	Probable glycerol-3-phosphate acyltransferase 2 [Source:UniProtKB/Swiss-Prot;Acc:Q9FZ22]	glycerol-3-phosphate O-acyltransferase activity|mitochondrion|cutin biosynthetic process|membrane|integral component of membrane|CDP-diacylglycerol biosynthetic process|dephosphorylation|transferase activity, transferring acyl groups|phosphatase activity|glycerol-3-phosphate 2-O-acyltransferase activity
AT1G02450	5.77067	3.69348e-21	7.12682e-20	8.47808	5.51932	6.08555	0.43881	0	0	NIMIN-1	Protein NIM1-INTERACTING 1 [Source:UniProtKB/Swiss-Prot;Acc:Q9FNZ5]
AT1G02460	1.21742	4.50143e-05	0.000199406	1.77168	1.13226	1.65571	0.791684	0.655398	0.637938		Pectin lyase-like superfamily protein [Source:TAIR;Acc:AT1G02460]	polygalacturonase activity|extracellular region|carbohydrate metabolic process|lyase activity|cell wall organization
AT1G02470	2.46293	2.83767e-10	2.46012e-09	3.34119	4.76533	5.81198	0.780139	0.806087	0.733437		Polyketide cyclase/dehydrase and lipid transport superfamily protein [Source:TAIR;Acc:AT1G02470]	molecular_function|biological_process|chloroplast
AT1G02850	2.55666	1.01456e-121	2.26343e-119	23.9297	25.224	27.5222	4.48196	5.18829	4.24953	BGLU11	Beta-glucosidase 11 [Source:UniProtKB/Swiss-Prot;Acc:B3H5Q1]	hydrolase activity, hydrolyzing O-glycosyl compounds|extracellular region|carbohydrate metabolic process|beta-glucosidase activity|glycosyl compound metabolic process
AT1G02920	4.38983	8.67454e-233	6.15761e-230	678.971	712.649	784.856	34.0834	36.0714	40.5176	GSTF7	Glutathione S-transferase F7 [Source:UniProtKB/Swiss-Prot;Acc:Q9SRY5]	glutathione transferase activity|cytoplasm|cytosol|glutathione metabolic process|response to toxic substance|toxin catabolic process|glutathione binding|vacuole|nucleus|response to cadmium ion|copper ion binding|defense response to bacterium|response to salt stress|defense response to fungus, incompatible interaction|cobalt ion binding
AT1G02930	5.26473	3.80933e-253	3.43206e-250	978.574	1009.15	1141.09	25.177	25.6548	35.4552	GSTF6	Glutathione S-transferase F6 [Source:UniProtKB/Swiss-Prot;Acc:P42760]	glutathione transferase activity|cytoplasm|glutathione metabolic process|response to toxic substance|toxin catabolic process|mitochondrion|response to oxidative stress|glutathione binding|vacuole|cell wall|response to cadmium ion|copper ion binding|defense response to bacterium|response to salt stress|cobalt ion binding|cytosol|plasmodesma|camalexin binding|quercitrin binding|response to water de…
AT1G02940	4.29352	6.81274e-22	1.37103e-20	3.60942	2.84205	2.48532	0	0.149447	0.302958	GSTF5	Glutathione S-transferase F5 [Source:UniProtKB/Swiss-Prot;Acc:Q9SRY6]	glutathione transferase activity|cytoplasm|cytosol|glutathione metabolic process|response to toxic substance|toxin catabolic process|mitochondrion
AT1G03230	1.45519	8.44523e-52	4.98311e-50	69.2983	67.3002	73.62	27.5556	27.0323	27.6315		Eukaryotic aspartyl protease family protein [Source:TAIR;Acc:AT1G03230]	extracellular region|cell wall|plant-type cell wall|response to salt stress|Golgi apparatus|plasma membrane
AT1G03495	5.3006	5.63395e-47	2.85661e-45	3.86211	3.01328	3.20542	0.141995	0.0848547	0.0572981	3AT2	Coumaroyl-CoA:anthocyanidin 3-O-glucoside-6''-O-coumaroyltransferase 2 [Source:UniProtKB/Swiss-Prot;Acc:Q9LR73]	cytoplasm|transferase activity|transferase activity, transferring acyl groups other than amino-acyl groups
AT1G03740	1.27529	1.11206e-43	5.10782e-42	31.5013	32.5102	35.3317	15.0426	13.6091	14.6803		Protein kinase superfamily protein [Source:TAIR;Acc:AT1G03740]	protein kinase activity|ATP binding|nucleus|protein phosphorylation|kinase activity|phosphorylation
AT1G03850	1.50987	1.77169e-46	8.88689e-45	57.355	58.9562	62.4915	21.5387	19.7948	23.5824	GRXS13	Monothiol glutaredoxin-S13 [Source:UniProtKB/Swiss-Prot;Acc:Q84TF4]	nucleus|cytoplasm|mitochondrion|electron carrier activity|protein disulfide oxidoreductase activity|cell redox homeostasis|metal ion binding|2 iron, 2 sulfur cluster binding|response to cytokinin|defense response to fungus|response to photooxidative stress
AT1G03880	4.10762	0.0107357	0.0285706	0.17388	0.0880748	0.211474	0	0.0285941	0	CRB	12S seed storage protein CRB [Source:UniProtKB/Swiss-Prot;Acc:P15456]	polysaccharide catabolic process|catalytic activity|Golgi apparatus|rRNA binding|coenzyme binding|chloroplast envelope|chloroplast|vacuole|chloroplast stroma|plastoglobule|RNA binding|response to wounding|stromule|cellular response to water deprivation|response to cold|defense response to bacterium|membrane|circadian rhythm|chloroplast organization|peroxisome|ribosome|rRNA processing|apoplast|pro…
AT1G03940	2.46641	2.7926e-07	1.74166e-06	1.23166	1.13593	0.709358	0.235822	0.268168	0.136622	3AT1	Coumaroyl-CoA:anthocyanidin 3-O-glucoside-6''-O-coumaroyltransferase 1 [Source:UniProtKB/Swiss-Prot;Acc:Q9ZWB4]	cytoplasm|transferase activity|transferase activity, transferring acyl groups other than amino-acyl groups
AT1G03980	1.40722	0.00380448	0.0113789	0.48698	0.507647	0.552522	0.158672	0.206493	0.138368	PCS2	Glutathione gamma-glutamylcysteinyltransferase 2 [Source:UniProtKB/Swiss-Prot;Acc:Q9ZWB7]	chloroplast|response to metal ion|glutathione gamma-glutamylcysteinyltransferase activity|metal ion binding|phytochelatin biosynthetic process
AT1G04370	2.35844	0.0412217	0.0915624	0	0.418338	0.209807	0.212835	0.200006	0.200342	ERF14	Ethylene-responsive transcription factor 14 [Source:UniProtKB/Swiss-Prot;Acc:P93822]	DNA binding|transcription factor activity, sequence-specific DNA binding|nucleus|transcription, DNA-templated|regulation of transcription, DNA-templated|defense response|intracellular|ethylene-activated signaling pathway
AT1G04940	1.93872	0.0336343	0.0769046	41.7631	41.4559	36.0543	46.949	44.7024	46.7518	TIC20-I	Protein TIC 20-I, chloroplastic [Source:UniProtKB/Swiss-Prot;Acc:Q8GZ79]
AT1G05300	1.2957	1.45992e-14	1.84658e-13	4.93384	6.13136	6.15651	2.32752	2.76526	2.75719	ZIP5	Zinc transporter 5 [Source:UniProtKB/Swiss-Prot;Acc:O23039]	zinc ion transmembrane transporter activity|plasma membrane|cation transport|cation transmembrane transporter activity|integral component of membrane|metal ion transmembrane transporter activity|zinc II ion transmembrane transport|cation transmembrane transport
AT1G05420	1.45141	2.04668e-05	9.64073e-05	4.50553	5.21596	3.47387	1.29	2.32771	1.59317	OFP12	Transcription repressor OFP12 [Source:UniProtKB/Swiss-Prot;Acc:F4I8R6]	nucleus|transcription, DNA-templated|negative regulation of transcription, DNA-templated
AT1G05575	1.52932	8.00423e-13	8.81933e-12	17.0235	22.4043	22.5168	5.52865	5.26931	9.32869		unknown protein; FUNCTIONS IN: molecular_function unknown; INVOLVED IN: anaerobic respiration; LOCATED IN: endomembrane system; EXPRESSED IN: 17 plant structures; EXPRESSED DURING: 9 growth stages; BEST Arabidopsis thaliana protein match is: unknown /.../in (TAIR:AT2G31945.1); Has 63 Blast hits to 63 proteins in 10 species: Archae - 0; Bacteria - 0; Metazoa - 0; Fungi - 0; Plants - 63; Viruses - …	molecular_function|anaerobic respiration|endoplasmic reticulum
AT1G05675	3.80806	2.8827e-66	2.4645e-64	7.14947	7.94705	8.87129	0.925534	0.351034	0.578641	UGT74E1	UDP-glycosyltransferase 74E1 [Source:UniProtKB/Swiss-Prot;Acc:P0C7P7]	metabolic process|transferase activity, transferring hexosyl groups
AT1G05700	2.27742	1.70917e-08	1.23839e-07	0.856398	1.57716	1.50886	0.199131	0.294753	0.260966		Probable LRR receptor-like serine/threonine-protein kinase At1g05700 [Source:UniProtKB/Swiss-Prot;Acc:C0LGD6]	protein serine/threonine kinase activity|ATP binding|plasma membrane|protein phosphorylation|integral component of membrane|kinase activity|phosphorylation
AT1G05880	4.69078	6.98078e-12	7.00921e-11	0.648458	0.559879	0.891585	0	0.0881948	0	ARI12	Probable E3 ubiquitin-protein ligase ARI12 [Source:UniProtKB/Swiss-Prot;Acc:Q84RQ9]	ubiquitin ligase complex|protein polyubiquitination|ubiquitin-protein transferase activity|nucleus|cytoplasm|protein ubiquitination|ligase activity|ubiquitin conjugating enzyme binding|positive regulation of proteasomal ubiquitin-dependent protein catabolic process|protein ubiquitination involved in ubiquitin-dependent protein catabolic process|metal ion binding|ubiquitin protein ligase activity|…
AT1G06135	Inf	0.00412898	0.0122401	1.02323	0.396079	0.273009	0	0	0		unknown protein; FUNCTIONS IN: molecular_function unknown; INVOLVED IN: biological_process unknown; LOCATED IN: endomembrane system; BEST Arabidopsis thaliana protein match is: unknown protein (TAIR:AT2G31345.1); Has 35333 Blast hits to 34131 protei /.../2444 species: Archae - 798; Bacteria - 22429; Metazoa - 974; Fungi - 991; Plants - 531; Viruses - 0; Other Eukaryotes - 9610 (source: NCBI BLink…	molecular_function|extracellular region|biological_process
AT1G06160	5.39398	6.8881e-111	1.2705e-108	20.8638	18.0879	17.5761	0.511468	0.529516	0.359194	ERF094	Ethylene-responsive transcription factor ERF094 [Source:UniProtKB/Swiss-Prot;Acc:Q9LND1]
AT1G06180	2.10432	7.32411e-26	1.78344e-24	14.5077	12.3238	15.5454	3.7614	2.87761	3.20962	ATMYB13	myb domain protein 13 [Source:TAIR;Acc:AT1G06180]
AT1G06620	2.46457	6.25482e-118	1.2631e-115	52.7702	57.4994	55.5359	12.0414	10.7932	8.51045		1-aminocyclopropane-1-carboxylate oxidase homolog 1 [Source:UniProtKB/Swiss-Prot;Acc:Q84MB3]	cytoplasm|oxidoreductase activity|oxidoreductase activity, acting on paired donors, with incorporation or reduction of molecular oxygen, 2-oxoglutarate as one donor, and incorporation of one atom each of oxygen into both donors|metal ion binding|oxidation-reduction process
AT1G07000	1.62785	9.99272e-28	2.639e-26	21.7219	20.7666	25.8038	8.18775	6.95209	7.87069	ATEXO70B2	exocyst subunit exo70 family protein B2 [Source:TAIR;Acc:AT1G07000]
AT1G07090	1.7652	5.98087e-35	2.0942e-33	24.9045	22.0557	23.9941	8.96614	6.63676	7.15933	LSH6	Protein LIGHT-DEPENDENT SHORT HYPOCOTYLS 6 [Source:UniProtKB/Swiss-Prot;Acc:Q9LMK2]	DNA binding|nucleus|regulation of transcription, DNA-templated
AT1G07240	1.34781	4.37236e-29	1.24299e-27	18.4765	19.258	20.6125	7.30856	8.71459	8.36245	UGT71C5	UDP-glycosyltransferase 71C5 [Source:UniProtKB/Swiss-Prot;Acc:Q9FE68]	UDP-glycosyltransferase activity|flavonoid biosynthetic process|transferase activity, transferring glycosyl groups|intracellular membrane-bounded organelle|flavonoid glucuronidation|quercetin 7-O-glucosyltransferase activity|quercetin 3-O-glucosyltransferase activity|cytosol|abscisic acid metabolic process|drought recovery|positive regulation of seed germination|abscisic acid glucosyltransferase …
AT1G07260	1.66762	1.48678e-26	3.73289e-25	10.6786	10.0665	9.93892	3.66415	3.34868	3.27421	UGT71C3	UDP-glycosyltransferase 71C3 [Source:UniProtKB/Swiss-Prot;Acc:Q9LML7]	UDP-glycosyltransferase activity|flavonoid biosynthetic process|transferase activity, transferring glycosyl groups|intracellular membrane-bounded organelle|flavonoid glucuronidation|quercetin 7-O-glucosyltransferase activity|quercetin 3-O-glucosyltransferase activity
AT1G07390	2.24817	8.75416e-55	5.66482e-53	5.23358	5.70073	5.94203	1.02141	1.25487	1.25776	AtRLP1	receptor like protein 1 [Source:TAIR;Acc:AT1G07390]
AT1G07620	2.21141	2.24305e-12	2.36896e-11	1.36246	1.63529	1.52691	0.29953	0.441763	0.179224	TRM32	Protein TRM32 [Source:UniProtKB/Swiss-Prot;Acc:F4HSD5]
AT1G07710	1.04274	0.022199	0.0537645	0.360711	0.707328	0.468419	0.111366	0.331996	0.222785		Ankyrin repeat family protein [Source:TAIR;Acc:AT1G07710]	biological_process|integral component of membrane
AT1G07900	2.27979	0.000239383	0.000928403	1.01229	1.95458	1.46381	0.645337	0	0.387624	LBD1	LOB domain-containing protein 1 [Source:UniProtKB/Swiss-Prot;Acc:Q9LQR0]	nucleus|biological_process|mitochondrion
AT1G07985	1.13239	3.65826e-15	4.84699e-14	20.9364	22.1499	23.1492	8.00677	11.8701	12.203		Expressed protein [Source:TAIR;Acc:AT1G07985]	molecular_function|mitochondrion|biological_process
AT1G08050	2.84983	1.18752e-62	9.27258e-61	14.817	17.1752	18.7905	2.55092	2.08204	2.94901		Zinc finger (C3HC4-type RING finger) family protein [Source:TAIR;Acc:AT1G08050]	ubiquitin-protein transferase activity|extracellular region|zinc ion binding|plasma membrane
AT1G08080	Inf	0.00603776	0.0171217	0.241602	0.121579	0.315253	0	0	0	ACA7	Alpha carbonic anhydrase 7 [Source:UniProtKB/Swiss-Prot;Acc:Q8L817]	carbonate dehydratase activity|calcium-transporting ATPase activity|calmodulin binding|ATP binding|integral component of plasma membrane|one-carbon metabolic process|zinc ion binding|chloroplast|chloroplast stroma|intracellular membrane-bounded organelle|metal ion binding|calcium ion transmembrane transport|plasma membrane|pollen development
AT1G08230	1.14706	6.24726e-16	8.64905e-15	11.3674	12.0384	11.7109	4.70163	5.90293	5.65766	GAT1	GABA transporter 1 [Source:UniProtKB/Swiss-Prot;Acc:F4HW02]	plasma membrane|integral component of membrane|gamma-aminobutyric acid transmembrane transporter activity|gamma-aminobutyric acid transport
AT1G08290	1.09306	0.0292327	0.0682933	0.742278	0.559926	1.19507	0.401935	0.484385	0.358861	WIP3	Zinc finger protein WIP3 [Source:UniProtKB/Swiss-Prot;Acc:Q9SGD1]	nucleic acid binding|nucleus|transcription, DNA-templated|zinc ion binding|integral component of membrane|nuclear membrane|metal ion binding|transcription factor activity, sequence-specific DNA binding|regulation of transcription, DNA-templated|nuclear envelope|protein binding|nucleus organization
AT1G08450	1.52443	5.42338e-57	3.75866e-55	54.8903	55.6954	63.4296	22.0956	21.5007	20.9727	CRT3	Calreticulin-3 [Source:UniProtKB/Swiss-Prot;Acc:O04153]	calcium ion binding|endoplasmic reticulum|endoplasmic reticulum lumen|protein folding|chloroplast|carbohydrate binding|unfolded protein binding|defense response signaling pathway, resistance gene-independent|defense response to bacterium|endoplasmic reticulum membrane|plant-type hypersensitive response|anthocyanin-containing compound metabolic process|calcium ion homeostasis
AT1G08930	1.20099	1.3429e-17	2.09996e-16	164.852	175.16	187.984	64.9724	73.605	97.1181	ERD6	Sugar transporter ERD6 [Source:UniProtKB/Swiss-Prot;Acc:O04036]	sugar:proton symporter activity|glucose transmembrane transporter activity|plasma membrane|integral component of plasma membrane|carbohydrate transmembrane transporter activity|membrane|hexose transmembrane transport|glucose import|response to chitin|response to water deprivation|response to salt stress|response to abscisic acid|endoplasmic reticulum|carbohydrate transmembrane transport|sugar tra…
AT1G08940	1.62965	2.51707e-32	8.05498e-31	18.1976	18.9968	19.0813	5.1962	6.08948	6.05981		Phosphoglycerate mutase-like protein AT74H [Source:UniProtKB/Swiss-Prot;Acc:O04035]	catalytic activity
AT1G09090	1.26425	9.76579e-08	6.47139e-07	7.74818	8.25959	6.04564	3.60559	2.44127	3.97987	RBOHB	Respiratory burst oxidase homolog protein B [Source:UniProtKB/Swiss-Prot;Acc:Q9SBI0]	peroxidase activity|calcium ion binding|plasma membrane|integral component of membrane|NAD(P)H oxidase activity|oxidation-reduction process|response to heat|seed germination|defense response
AT1G09240	2.20158	1.31557e-05	6.43634e-05	3.65272	2.30149	2.04384	0.847505	0.473753	0.528436	NAS3	Nicotianamine synthase 3 [Source:UniProtKB/Swiss-Prot;Acc:O80483]	nicotianamine synthase activity|nicotianamine biosynthetic process|pollen development|pollen tube growth|phloem transport
AT1G09430	1.10143	2.27112e-35	8.073e-34	75.2023	80.5838	84.2434	38.0698	40.7314	40.4775	ACLA-3	ATP-citrate synthase alpha chain protein 3 [Source:UniProtKB/Swiss-Prot;Acc:O80526]	ATP binding|cytoplasm|lipid metabolic process|ATP citrate synthase activity|acetyl-CoA biosynthetic process|citrate lyase complex|cytosol
AT1G09480	1.07136	5.04909e-05	0.000221489	2.89004	3.24005	3.06338	1.82083	1.4323	1.29773		NAD(P)-binding Rossmann-fold superfamily protein [Source:TAIR;Acc:AT1G09480]	cellular_component|lignin biosynthetic process|cinnamyl-alcohol dehydrogenase activity|coenzyme binding|alcohol dehydrogenase (NAD) activity|oxidation-reduction process
AT1G09930	2.94402	0.0145156	0.0371666	0.0242771	0.192073	0.149993	0	0	0.0241343	OPT2	Oligopeptide transporter 2 [Source:UniProtKB/Swiss-Prot;Acc:O04514]	cytoplasm|oligopeptide transport|protein transport|oligopeptide transporter activity|integral component of membrane|transmembrane transport|membrane|plasma membrane
AT1G09932	4.20476	3.37073e-61	2.53888e-59	27.5201	32.3082	34.6681	2.53497	1.00433	1.66658		Phosphoglycerate mutase family protein [Source:TAIR;Acc:AT1G09932]	nucleus|biological_process
AT1G09935	Inf	2.91471e-05	0.000133484	0.544795	0.186211	0.378944	0	0	0		Phosphoglycerate mutase family protein [Source:TAIR;Acc:AT1G09935]	catalytic activity
AT1G09940	1.30936	3.18195e-35	1.12594e-33	22.561	22.4712	25.3298	9.24384	9.71367	11.0803	HEMA2	Glutamyl-tRNA reductase 2, chloroplastic [Source:UniProtKB/Swiss-Prot;Acc:P49294]	protoporphyrinogen IX biosynthetic process|glutamyl-tRNA reductase activity|chloroplast|chlorophyll biosynthetic process|NADP binding|oxidation-reduction process|heme biosynthetic process|response to oxidative stress|tetrapyrrole biosynthetic process|plastid|porphyrin-containing compound biosynthetic process
AT1G09950	2.11521	0.000477626	0.00174491	1.32246	0.628632	1.02905	0.258392	0.157494	0.31923	RAS1	RESPONSE TO ABA AND SALT 1 [Source:TAIR;Acc:AT1G09950]	nucleus|transcription, DNA-templated|sequence-specific DNA binding
AT1G09970	1.46647	8.00271e-57	5.51363e-55	160.13	160.02	180.768	66.6743	60.2788	66.5014	LRR XI-23	Leucine-rich receptor-like protein kinase family protein [Source:TAIR;Acc:AT1G09970]	protein kinase activity|protein serine/threonine kinase activity|ATP binding|plasma membrane|protein phosphorylation|transmembrane receptor protein tyrosine kinase signaling pathway|integral component of membrane|kinase activity|protein autophosphorylation|response to oxidative stress|seed germination
AT1G10070	1.53082	9.16921e-17	1.34821e-15	30.921	32.7884	31.9268	7.03142	16.5127	12.3619	BCAT2	Branched-chain-amino-acid aminotransferase 2, chloroplastic [Source:UniProtKB/Swiss-Prot;Acc:Q9M439]
AT1G10340	6.75389	4.13598e-157	1.2918e-154	28.621	30.9266	36.0257	0.217315	0.340573	0.366604		Ankyrin repeat family protein [Source:TAIR;Acc:AT1G10340]	biological_process|integral component of membrane
AT1G10370	1.65292	2.34149e-45	1.14032e-43	99.7942	92.202	87.8377	38.9588	26.1851	31.6341	GSTU17	Glutathione S-transferase U17 [Source:UniProtKB/Swiss-Prot;Acc:Q9FUS8]
AT1G10400	1.39059	0.000676253	0.00239366	0.998064	1.49989	1.53408	0.726715	0.544091	0.322569	UGT90A2	UDP-glycosyltransferase 90A2 [Source:UniProtKB/Swiss-Prot;Acc:Q9SY84]	UDP-glycosyltransferase activity|transferase activity, transferring glycosyl groups|transferase activity, transferring hexosyl groups
AT1G10700	1.00382	1.78662e-19	3.11165e-18	29.0316	27.6826	29.3111	14.6759	14.4143	16.3816	PRS3	Ribose-phosphate pyrophosphokinase 3, chloroplastic [Source:UniProtKB/Swiss-Prot;Acc:Q93Z66]	magnesium ion binding|ribose phosphate diphosphokinase activity|ATP binding|nucleoside metabolic process|nucleotide biosynthetic process|chloroplast|kinase activity|phosphorylation
AT1G10990	1.47617	1.21903e-09	1.00055e-08	4.42829	4.77726	4.65865	1.28758	2.24539	1.94771		unknown protein; Has 4 Blast hits to 4 proteins in 1 species: Archae - 0; Bacteria - 0; Metazoa - 0; Fungi - 0; Plants - 4; Viruses - 0; Other Eukaryotes - 0 (source: NCBI BLink). [Source:TAIR;Acc:AT1G10990]	molecular_function|nucleus|mitochondrion|biological_process|integral component of membrane
AT1G11330	2.40396	1.63503e-40	6.901e-39	17.8503	18.1634	22.3042	3.78465	3.79897	4.24729		G-type lectin S-receptor-like serine/threonine-protein kinase At1g11330 [Source:UniProtKB/Swiss-Prot;Acc:Q9SXB8]	protein serine/threonine kinase activity|ATP binding|plasma membrane|protein phosphorylation|integral component of membrane|kinase activity|carbohydrate binding|recognition of pollen
AT1G11580	1.81129	1.3105e-27	3.4454e-26	129.412	153.827	167.403	50.9755	44.2711	40.9326	PME18	Pectinesterase/pectinesterase inhibitor 18 [Source:UniProtKB/Swiss-Prot;Acc:Q1JPL7]
AT1G11925	Inf	0.00901216	0.0244538	0.510641	0.126055	0.198982	0	0	0		Stigma-specific Stig1 family protein [Source:TAIR;Acc:AT1G11925]	molecular_function|extracellular region|biological_process|integral component of membrane
AT1G12220	1.27932	6.2453e-14	7.54492e-13	5.80606	6.22738	7.36329	2.39766	2.74508	3.29239	RPS5	Disease resistance protein RPS5 [Source:UniProtKB/Swiss-Prot;Acc:O64973]	ATP binding|ADP binding|plant-type hypersensitive response|defense response|defense response to bacterium, incompatible interaction|plasma membrane|protein binding|cell death|signaling receptor activity|nucleotide binding|intracellular
AT1G13110	1.61414	2.04496e-71	1.98769e-69	89.1921	83.4112	83.9078	31.1149	28.1413	28.9111	CYP71B7	Cytochrome P450 71B7 [Source:UniProtKB/Swiss-Prot;Acc:Q96514]	iron ion binding|membrane|integral component of membrane|oxidoreductase activity, acting on paired donors, with incorporation or reduction of molecular oxygen, NAD(P)H as one donor, and incorporation of one atom of oxygen|oxygen binding|heme binding|secondary metabolite biosynthetic process|oxidation-reduction process|defense response to other organism
AT1G13210	1.66722	1.18398e-46	5.97733e-45	35.7536	38.0353	42.4142	13.2369	12.2163	13.6869	ALA11	Putative phospholipid-transporting ATPase 11 [Source:UniProtKB/Swiss-Prot;Acc:Q9SAF5]
AT1G13270	1.17255	2.02992e-18	3.30904e-17	10.5319	11.4626	11.6898	4.83856	6.82639	4.59303	MAP1B	Methionine aminopeptidase 1B, chloroplastic [Source:UniProtKB/Swiss-Prot;Acc:Q9FV52]	aminopeptidase activity|mitochondrion|proteolysis|metalloexopeptidase activity|metal ion binding|chloroplast|N-terminal protein amino acid modification
AT1G13280	1.36904	5.90908e-45	2.80203e-43	79.2125	77.3214	74.4031	29.0041	33.5749	32.7113	AOC4	Allene oxide cyclase 4, chloroplastic [Source:UniProtKB/Swiss-Prot;Acc:Q93ZC5]	chloroplast|jasmonic acid biosynthetic process|allene-oxide cyclase activity|plasma membrane
AT1G13340	2.29888	1.2085e-51	7.05964e-50	12.4871	12.1928	14.0598	3.27897	2.39277	2.67871		Regulator of Vps4 activity in the MVB pathway protein [Source:TAIR;Acc:AT1G13340]
AT1G13470	9.00905	1.81489e-32	5.85591e-31	4.71292	5.27298	7.13786	0.0370296	0	0		Protein of unknown function (DUF1262) [Source:TAIR;Acc:AT1G13470]	molecular_function|biological_process
AT1G13480	3.88093	2.26112e-20	4.16733e-19	3.94473	5.73371	6.36306	0.239105	0.413913	0.524248		Protein of unknown function (DUF1262) [Source:TAIR;Acc:AT1G13480]	molecular_function|cellular_component|biological_process
AT1G13540	3.05514	2.805e-16	3.97743e-15	2.48683	3.00926	3.76398	0.324163	0.327599	0.330599		Protein of unknown function (DUF1262) [Source:TAIR;Acc:AT1G13540]	molecular_function|biological_process|chloroplast
AT1G13550	2.44369	0.00236715	0.00742308	0.366989	0.85585	1.02186	0.201695	0.122598	0.164013		Protein of unknown function (DUF1262) [Source:TAIR;Acc:AT1G13550]	molecular_function|nucleus|biological_process
AT1G13750	2.48308	5.7935e-88	7.66739e-86	17.3178	17.7219	20.1137	3.36036	3.87105	3.53311	PAP1	Probable inactive purple acid phosphatase 1 [Source:UniProtKB/Swiss-Prot;Acc:Q9LMX4]	DNA binding|acid phosphatase activity|protein serine/threonine phosphatase activity|extracellular region|nucleus|mitochondrion|transcription, DNA-templated|regulation of transcription, DNA-templated|phospholipid metabolic process|signal transduction|phosphatidate phosphatase activity|chloroplast|plant-type hypersensitive response|auxin-activated signaling pathway|anthocyanin-containing compound m…
AT1G13990	1.59371	1.84286e-40	7.7642e-39	14.2982	14.3906	16.2064	4.47265	5.69754	5.61757		unknown protein; FUNCTIONS IN: molecular_function unknown; INVOLVED IN: biological_process unknown; LOCATED IN: chloroplast; EXPRESSED IN: 23 plant structures; EXPRESSED DURING: 13 growth stages; CONTAINS InterPro DOMAIN/s: Protein of unknown functi /.../3110 (InterPro:IPR021503); Has 25 Blast hits to 25 proteins in 8 species: Archae - 0; Bacteria - 0; Metazoa - 0; Fungi - 0; Plants - 25; Viruses…	molecular_function|biological_process|chloroplast
AT1G14120	1.27818	2.51943e-33	8.4311e-32	39.3221	39.9901	40.5179	19.2079	17.0772	15.0523		2-oxoglutarate (2OG) and Fe(II)-dependent oxygenase superfamily protein [Source:TAIR;Acc:AT1G14120]
AT1G14210	1.07701	2.32312e-28	6.35736e-27	70.549	74.3231	78.1492	35.5209	35.6343	41.7133		Ribonuclease T2 family protein [Source:TAIR;Acc:AT1G14210]	RNA binding|endoribonuclease activity|cytoplasm|ribonuclease T2 activity|response to salt stress
AT1G14250	5.00365	7.97761e-32	2.49705e-30	6.33809	4.81872	4.24118	0.190928	0.248509	0.110346	APY5	Probable apyrase 5 [Source:UniProtKB/Swiss-Prot;Acc:Q6NQA8]	ATP binding|plasma membrane|integral component of membrane|hydrolase activity|vacuole
AT1G14360	1.18266	8.20852e-27	2.09689e-25	28.1409	30.4916	31.8013	14.839	13.969	14.5329	UTR3	UDP-galactose/UDP-glucose transporter 3 [Source:UniProtKB/Swiss-Prot;Acc:Q9M9S6]	UDP-galactose transmembrane transporter activity|pyrimidine nucleotide-sugar transmembrane transporter activity|UDP-galactose transmembrane transport|UDP-glucose transmembrane transporter activity|embryo sac development|pollen development|integral component of Golgi membrane|integral component of endoplasmic reticulum membrane|endoplasmic reticulum unfolded protein response
AT1G14370	1.84465	1.17856e-57	8.31561e-56	24.81	26.8858	25.0656	7.42783	7.12305	8.54399	APK2A	Protein kinase 2A, chloroplastic [Source:UniProtKB/Swiss-Prot;Acc:O49839]	protein serine/threonine kinase activity|ATP binding|protein phosphorylation|chloroplast|kinase activity|plasma membrane
AT1G14540	1.86395	5.91809e-17	8.81318e-16	5.90044	6.04102	6.21203	2.0136	1.75767	1.49796	PER4	Peroxidase 4 [Source:UniProtKB/Swiss-Prot;Acc:Q9LE15]	peroxidase activity|extracellular region|response to oxidative stress|heme binding|hydrogen peroxide catabolic process|metal ion binding|oxidation-reduction process|cellular response to hypoxia
AT1G14750	1.3502	9.79193e-05	0.000407417	0.849988	1.00651	1.16671	0.598105	0.423152	0.237778	SDS	Cyclin-SDS [Source:UniProtKB/Swiss-Prot;Acc:Q1PFW3]	cyclin-dependent protein serine/threonine kinase activity|nucleus|cell division|regulation of cell cycle|double-strand break repair via homologous recombination|chiasma assembly
AT1G14780	1.8213	3.91367e-48	2.05096e-46	13.2997	14.4096	15.202	4.14246	4.2742	4.47253		MACPF domain-containing protein At1g14780 [Source:UniProtKB/Swiss-Prot;Acc:Q8L612]	molecular_function|nucleus|plant-type hypersensitive response
AT1G14870	1.23389	1.55678e-22	3.26186e-21	166.821	177.171	190.833	100.42	62.5287	86.8185	PCR2	Protein PLANT CADMIUM RESISTANCE 2 [Source:UniProtKB/Swiss-Prot;Acc:Q9LQU4]	molecular_function|cytoplasm|integral component of membrane|plasma membrane|response to oxidative stress
AT1G14880	9.34315	1.43832e-44	6.73855e-43	11.7534	17.4212	16.8313	0.0873307	0	0	PCR1	Protein PLANT CADMIUM RESISTANCE 1 [Source:UniProtKB/Swiss-Prot;Acc:Q9LQU2]	molecular_function|plasma membrane|biological_process|integral component of membrane|vacuole
AT1G15010	2.59636	1.77918e-51	1.03418e-49	40.4148	38.8853	40.7208	4.92668	6.55047	9.63867		unknown protein; BEST Arabidopsis thaliana protein match is: unknown protein (TAIR:AT2G01300.1); Has 71 Blast hits to 71 proteins in 13 species: Archae - 0; Bacteria - 2; Metazoa - 0; Fungi - 0; Plants - 69; Viruses - 0; Other Eukaryotes - 0 (source /.../ BLink). [Source:TAIR;Acc:AT1G15010]	molecular_function|mitochondrion|integral component of membrane|defense response to fungus
AT1G15040	1.09279	3.13343e-05	0.000142747	30.5526	38.9218	41.7796	11.3834	22.0057	21.6576		Class I glutamine amidotransferase-like superfamily protein [Source:TAIR;Acc:AT1G15040]
AT1G15125	7.283	0	0	196.935	178.171	181.385	1.0902	1.23296	1.00969		S-adenosyl-L-methionine-dependent methyltransferases superfamily protein [Source:TAIR;Acc:AT1G15125]	nucleus|methyltransferase activity|S-adenosylmethionine-dependent methyltransferase activity|methylation
AT1G15415	2.62083	1.11778e-07	7.35713e-07	2.70199	3.38004	2.49748	0.534861	0.390553	0.395607		The protein encoded by this gene was identified as a part of pollen proteome by mass spec analysis. It has weak homology to LEA (late embryo abundant) proteins. Encodes protein phosphatase 2A (PP2A) B'gamma subunit. Targeted to nucleus and cytosol. [Source:TAIR;Acc:AT1G15415]	molecular_function|nucleus|biological_process|cytosol|apoplast
AT1G15520	7.91678	3.22109e-88	4.28717e-86	9.24693	7.19761	8.90287	0.0202616	0.0304421	0.030502	ABCG40	ABC transporter G family member 40 [Source:UniProtKB/Swiss-Prot;Acc:Q9M9E1]	ATP binding|defense response|integral component of membrane|ATPase activity, coupled to transmembrane movement of substances|plasma membrane|lead ion transport|drug transmembrane transport|response to ethylene|response to salicylic acid|response to jasmonic acid|response to ozone|terpenoid transport|abscisic acid transport
AT1G15610	Inf	9.4487e-09	7.0534e-08	1.05758	0.723772	1.23323	0	0	0		unknown protein; BEST Arabidopsis thaliana protein match is: unknown protein (TAIR:AT1G15630.1); Has 129 Blast hits to 129 proteins in 15 species: Archae - 0; Bacteria - 2; Metazoa - 0; Fungi - 0; Plants - 127; Viruses - 0; Other Eukaryotes - 0 (sou /.../CBI BLink). [Source:TAIR;Acc:AT1G15610]	molecular_function|biological_process|integral component of membrane
AT1G15630	3.35389	4.81818e-13	5.42625e-12	1.94134	2.8805	2.88475	0.354984	0.117563	0.349653		unknown protein; BEST Arabidopsis thaliana protein match is: unknown protein (TAIR:AT1G15610.1); Has 122 Blast hits to 122 proteins in 14 species: Archae - 0; Bacteria - 0; Metazoa - 0; Fungi - 0; Plants - 122; Viruses - 0; Other Eukaryotes - 0 (sou /.../CBI BLink). [Source:TAIR;Acc:AT1G15630]	molecular_function|nucleus|biological_process|integral component of membrane
AT1G15640	2.29877	1.29642e-06	7.38898e-06	1.88498	1.75429	1.77332	0.415242	0.354621	0.352474		unknown protein; BEST Arabidopsis thaliana protein match is: unknown protein (TAIR:AT1G15620.1); Has 154 Blast hits to 146 proteins in 13 species: Archae - 0; Bacteria - 0; Metazoa - 0; Fungi - 0; Plants - 154; Viruses - 0; Other Eukaryotes - 0 (sou /.../CBI BLink). [Source:TAIR;Acc:AT1G15640]	molecular_function|biological_process|integral component of membrane
AT1G15670	1.14935	1.60805e-34	5.56405e-33	70.5259	73.6791	69.2625	30.1555	37.9642	34.8686		F-box/kelch-repeat protein At1g15670 [Source:UniProtKB/Swiss-Prot;Acc:Q9LMR5]
AT1G15790	3.41141	4.16397e-56	2.8191e-54	5.68737	6.83253	8.34997	0.538882	0.876437	0.942295		unknown protein; BEST Arabidopsis thaliana protein match is: unknown protein (TAIR:AT1G15780.1); Has 170 Blast hits to 94 proteins in 14 species: Archae - 0; Bacteria - 0; Metazoa - 0; Fungi - 0; Plants - 170; Viruses - 0; Other Eukaryotes - 0 (sour /.../BI BLink). [Source:TAIR;Acc:AT1G15790]	transcription cofactor activity|nucleus|regulation of transcription, DNA-templated|cytosol
AT1G15890	1.27631	3.66375e-11	3.46202e-10	2.83349	2.63344	2.47748	1.01479	1.01833	1.38032		Probable disease resistance protein At1g15890 [Source:UniProtKB/Swiss-Prot;Acc:Q9LMP6]	ATP binding|nucleus|defense response|ADP binding
AT1G16110	1.47614	6.39611e-27	1.64106e-25	9.35713	8.62443	10.1445	2.99541	3.23124	4.32052	WAKL6	Wall-associated receptor kinase-like 6 [Source:UniProtKB/Swiss-Prot;Acc:Q8GXQ3]	protein serine/threonine kinase activity|ATP binding|extracellular region|plasma membrane|protein phosphorylation|cell surface receptor signaling pathway|integral component of membrane|kinase activity|polysaccharide binding
AT1G16400	2.01527	1.10518e-54	7.09283e-53	29.73	30.7829	30.8476	10.6341	4.68754	9.03304	CYP79F2	Hexahomomethionine N-hydroxylase [Source:UniProtKB/Swiss-Prot;Acc:Q9FUY7]	iron ion binding|endoplasmic reticulum membrane|indoleacetic acid biosynthetic process|membrane|integral component of membrane|oxygen binding|heme binding|oxidation-reduction process|defense response to other organism|endoplasmic reticulum|oxidoreductase activity, acting on paired donors, with incorporation or reduction of molecular oxygen, NAD(P)H as one donor, and incorporation of one atom of o…
AT1G16410	4.45721	1.28175e-19	2.26092e-18	20.1879	14.6259	12.3772	1.04841	0.354038	0.823976	CYP79F1	Dihomomethionine N-hydroxylase [Source:UniProtKB/Swiss-Prot;Acc:Q949U1]	iron ion binding|endoplasmic reticulum membrane|chloroplast|indoleacetic acid biosynthetic process|membrane|integral component of membrane|heme binding|oxidation-reduction process|defense response to other organism|endoplasmic reticulum|oxidoreductase activity, acting on paired donors, with incorporation or reduction of molecular oxygen, NAD(P)H as one donor, and incorporation of one atom of oxyg…
AT1G16420	3.29156	5.11026e-31	1.55062e-29	3.767	4.02565	3.95486	0.396339	0.389814	0.437834	AMC8	Metacaspase-8 [Source:UniProtKB/Swiss-Prot;Acc:Q9SA41]
AT1G16510	1.33979	0.000567578	0.00204421	5.75387	4.45484	3.23734	2.52452	1.47459	1.75852	SAUR41	Auxin-responsive protein SAUR41 [Source:UniProtKB/Swiss-Prot;Acc:Q9SA49]	molecular_function|response to auxin|cytoplasm|positive gravitropism|cell growth|auxin transport|root radial pattern formation
AT1G16670	1.62117	4.75853e-42	2.10318e-40	17.906	17.1569	19.9078	5.8395	6.25622	6.75446		Protein kinase superfamily protein [Source:TAIR;Acc:AT1G16670]	ATP binding|plasma membrane|kinase activity|protein serine/threonine kinase activity|protein autophosphorylation
AT1G17250	3.19993	7.91919e-31	2.38748e-29	3.14927	3.02698	3.34444	0.387314	0.285689	0.392251	AtRLP3	receptor like protein 3 [Source:TAIR;Acc:AT1G17250]
AT1G17290	1.77033	1.19507e-51	7.00537e-50	192.348	209.847	230.631	62.5835	60.796	69.8618	ALAAT1	Alanine aminotransferase 1, mitochondrial [Source:UniProtKB/Swiss-Prot;Acc:F4I7I0]
AT1G17380	5.25489	2.15384e-78	2.42566e-76	10.8471	12.9113	13.9968	0.277369	0.357265	0.406342	TIFY11A	Protein TIFY 11A [Source:UniProtKB/Swiss-Prot;Acc:Q9LDU5]
AT1G17420	4.09458	1.37651e-208	7.1655e-206	20.8475	22.7617	24.0767	1.3936	0.938962	1.82284	LOX3	Lipoxygenase 3, chloroplastic [Source:UniProtKB/Swiss-Prot;Acc:Q9LNR3]	chloroplast|oxylipin biosynthetic process|metal ion binding|response to wounding|response to high light intensity|response to jasmonic acid|linoleate 13S-lipoxygenase activity|response to fungus|pollen development|anther dehiscence|anther development|stamen filament development|lipid oxidation|jasmonic acid biosynthetic process|defense response|growth
AT1G17480	1.1006	0.000412468	0.00152712	1.57579	1.24979	1.95764	1.16883	0.634817	0.707563	IQD7	IQ-domain 7 [Source:TAIR;Acc:AT1G17480]	calmodulin binding|nucleus|biological_process
AT1G17490	1.09154	9.39953e-12	9.31405e-11	22.0875	25.4716	22.3223	12.3624	10.6812	12.7136		unknown protein; BEST Arabidopsis thaliana protein match is: unknown protein (TAIR:AT1G72690.1); Has 57 Blast hits to 45 proteins in 9 species: Archae - 0; Bacteria - 0; Metazoa - 0; Fungi - 0; Plants - 57; Viruses - 0; Other Eukaryotes - 0 (source: /.../BLink). [Source:TAIR;Acc:AT1G17490]	molecular_function|nucleus|biological_process
AT1G17500	1.03123	3.76367e-16	5.29195e-15	22.697	24.2714	28.3256	13.5504	13.0064	13.0355	ALA4	Putative phospholipid-transporting ATPase 4 [Source:UniProtKB/Swiss-Prot;Acc:Q9LNQ4]	magnesium ion binding|ATP binding|ATPase activity, coupled to transmembrane movement of ions, phosphorylative mechanism|integral component of membrane|plasma membrane
AT1G17600	4.25652	1.95395e-48	1.03555e-46	1.85102	2.30602	2.50739	0.197529	0.100313	0.0433154		Disease resistance protein (TIR-NBS-LRR class) family [Source:TAIR;Acc:AT1G17600]	cytoplasm|defense response|signal transduction|integral component of membrane|ADP binding
AT1G17610	4.14862	6.52278e-21	1.23522e-19	1.67213	1.86208	2.29266	0.146626	0.111169	0.148719		Disease resistance protein (TIR-NBS class) [Source:TAIR;Acc:AT1G17610]
AT1G17615	Inf	0.00185421	0.00595	0.175647	0.129664	0.0902815	0	0	0		Disease resistance protein (TIR-NBS class) [Source:TAIR;Acc:AT1G17615]	defense response|signal transduction|ADP binding
AT1G17745	1.13455	5.22271e-37	1.94812e-35	49.448	51.4449	53.7284	27.5814	23.4779	24.3164	PGDH2	D-3-phosphoglycerate dehydrogenase 2, chloroplastic [Source:UniProtKB/Swiss-Prot;Acc:O04130]
AT1G17750	1.81499	1.61004e-22	3.37043e-21	3.6617	3.53207	4.50022	1.27165	1.29276	0.911706	PEPR2	Leucine-rich repeat receptor-like protein kinase PEPR2 [Source:UniProtKB/Swiss-Prot;Acc:Q9FZ59]	protein serine/threonine kinase activity|ATP binding|plasma membrane|protein phosphorylation|transmembrane receptor protein tyrosine kinase signaling pathway|integral component of membrane|kinase activity|response to wounding|response to jasmonic acid|peptide binding|defense response to bacterium
AT1G17830	1.36566	6.83641e-14	8.22934e-13	6.25937	6.35369	6.58828	2.88532	2.00515	3.23834		Protein of unknown function (DUF789) [Source:TAIR;Acc:AT1G17830]	molecular_function|nucleus|biological_process
AT1G18210	1.32089	9.8968e-40	4.04594e-38	100.699	102.696	107.711	43.6075	44.2241	45.0225	CML27	Probable calcium-binding protein CML27 [Source:UniProtKB/Swiss-Prot;Acc:Q9LE22]	calcium ion binding|plasma membrane|biological_process|vacuole
AT1G18350	2.7296	1.58236e-17	2.46292e-16	4.53056	3.48864	3.40921	0.533785	0.735336	0.502952	MKK7	Mitogen-activated protein kinase kinase 7 [Source:UniProtKB/Swiss-Prot;Acc:Q9LPQ3]	receptor signaling protein serine/threonine kinase activity|ATP binding|cytoplasm|kinase activity|MAP kinase kinase activity|auxin polar transport|defense response to oomycetes|systemic acquired resistance, salicylic acid mediated signaling pathway|defense response to bacterium
AT1G18520	4.16129	0.0108962	0.0289391	0.37718	0.265593	0.220678	0.0533284	0	0	TET11	Tetraspanin-11 [Source:UniProtKB/Swiss-Prot;Acc:Q9LPR6]	molecular_function|extracellular region|aging|integral component of membrane
AT1G18570	1.08142	1.36864e-09	1.11631e-08	30.7387	31.887	36.7838	14.4069	14.2421	20.8493	MYB51	Transcription factor MYB51 [Source:UniProtKB/Swiss-Prot;Acc:O49782]	DNA binding|nucleus|transcription, DNA-templated|regulation of transcription, DNA-templated|transcription factor activity, sequence-specific DNA binding|response to salt stress|response to ethylene|response to auxin|response to abscisic acid|response to gibberellin|response to salicylic acid|response to jasmonic acid|indole glucosinolate biosynthetic process|defense response to bacterium|defense …
AT1G18590	1.27418	2.94615e-22	6.06445e-21	30.2483	27.6628	26.2092	15.21	10.4571	11.3586	SOT17	Cytosolic sulfotransferase 17 [Source:UniProtKB/Swiss-Prot;Acc:Q9FZ80]	cytoplasm|sulfotransferase activity|glucosinolate biosynthetic process|desulfoglucosinolate sulfotransferase activity
AT1G18710	4.01914	6.26041e-14	7.55929e-13	5.22815	4.34452	2.95855	0.449961	0.162148	0.290945	AtMYB47	myb domain protein 47 [Source:TAIR;Acc:AT1G18710]
AT1G18835	1.14389	0.00221337	0.00699047	3.59455	6.18317	3.55176	3.08713	2.8956	1.27676	MIF3	Mini zinc finger protein 3 [Source:UniProtKB/Swiss-Prot;Acc:Q2Q493]	nucleus|transcription, DNA-templated|regulation of transcription, DNA-templated|multicellular organism development|metal ion binding|protein binding|regulation of meristem development
AT1G19020	1.75351	1.38644e-19	2.43823e-18	106.376	104.125	132.299	31.8969	30.0125	43.2253		unknown protein; BEST Arabidopsis thaliana protein match is: unknown protein (TAIR:AT3G48180.1); Has 88 Blast hits to 88 proteins in 15 species: Archae - 0; Bacteria - 0; Metazoa - 0; Fungi - 0; Plants - 88; Viruses - 0; Other Eukaryotes - 0 (source /.../ BLink). [Source:TAIR;Acc:AT1G19020]	molecular_function|cellular_component|response to oxidative stress
AT1G19130	1.18589	1.44287e-26	3.63043e-25	49.8544	53.6183	54.4861	24.6999	24.8355	22.8337		CONTAINS InterPro DOMAIN/s: Protein of unknown function DUF985 (InterPro:IPR009327), RmlC-like jelly roll fold (InterPro:IPR014710); Has 1465 Blast hits to 1465 proteins in 584 species: Archae - 10; Bacteria - 1038; Metazoa - 19; Fungi - 43; Plants /.../Viruses - 0; Other Eukaryotes - 304 (source: NCBI BLink). [Source:TAIR;Acc:AT1G19130]	molecular_function|biological_process|cytosol
AT1G19180	1.35853	2.5966e-20	4.75982e-19	81.1098	89.4684	102.348	35.7078	33.3123	42.7891	TIFY10A	Protein TIFY 10A [Source:UniProtKB/Swiss-Prot;Acc:Q9LMA8]
AT1G19250	6.95476	7.39625e-46	3.66294e-44	11.0892	12.4149	16.0327	0.19852	0.114585	0.0574775	FMO1	Probable flavin-containing monooxygenase 1 [Source:UniProtKB/Swiss-Prot;Acc:Q9LMA1]	monooxygenase activity|N,N-dimethylaniline monooxygenase activity|chloroplast|flavin adenine dinucleotide binding|NADP binding|oxidation-reduction process|plant-type hypersensitive response|defense response signaling pathway, resistance gene-dependent|response to other organism|defense response signaling pathway, resistance gene-independent|defense response to bacterium|defense response to fungus…
AT1G19380	2.1257	4.5572e-81	5.39154e-79	206.491	208.703	209.84	35.5175	42.6706	65.7312		Protein of unknown function (DUF1195) [Source:TAIR;Acc:AT1G19380]	biological_process|integral component of membrane
AT1G19530	1.0843	0.00314136	0.0095691	31.4675	43.195	51.8972	9.13609	25.8533	26.0713		unknown protein; FUNCTIONS IN: molecular_function unknown; INVOLVED IN: N-terminal protein myristoylation, anaerobic respiration; LOCATED IN: cellular_component unknown; EXPRESSED IN: leaf apex, inflorescence meristem, hypocotyl, root, flower; EXPRE /.../URING: petal differentiation and expansion stage; Has 47 Blast hits to 47 proteins in 13 species: Archae - 0; Bacteria - 0; Metazoa - 0; Fungi -…	molecular_function|nucleus|anaerobic respiration
AT1G19550	Inf	7.92496e-05	0.0003357	0	0.200685	0.20532	0	0	0		Glutathione S-transferase family protein [Source:TAIR;Acc:AT1G19550]
AT1G19570	1.44713	1.44744e-42	6.45832e-41	507.414	455.92	446.406	202.696	160.747	188.343	DHAR1	Glutathione S-transferase DHAR1, mitochondrial [Source:UniProtKB/Swiss-Prot;Acc:Q9FWR4]	glutathione transferase activity|voltage-gated ion channel activity|cytoplasm|ion transport|defense response|regulation of ion transmembrane transport|glutathione dehydrogenase (ascorbate) activity|protein glutathionylation|mitochondrion|vacuole|chloroplast stroma|response to jasmonic acid|response to ozone|copper ion binding|plasma membrane|chloroplast|apoplast|peroxisome|response to symbiotic f…
AT1G19610	5.74357	4.92712e-248	3.97992e-245	152.901	175.63	149.69	2.8751	4.24614	2.01974	PDF1.4	Defensin-like protein 19 [Source:UniProtKB/Swiss-Prot;Acc:P82787]	molecular_function|extracellular region|defense response|killing of cells of other organism|defense response to fungus
AT1G19640	1.99802	0.000217271	0.000849962	0.627791	0.876466	0.551858	0.432902	0.0311935	0.125709	JMT	Jasmonate O-methyltransferase [Source:UniProtKB/Swiss-Prot;Acc:Q9AR07]	nucleus|oxylipin biosynthetic process|methylation|cytoplasm|response to wounding|jasmonic acid metabolic process|jasmonic acid biosynthetic process|jasmonic acid mediated signaling pathway|jasmonate O-methyltransferase activity
AT1G19670	3.85109	5.88509e-178	2.15403e-175	118.725	112.008	103.933	8.1168	8.60869	8.08021	CLH1	Chlorophyllase-1 [Source:UniProtKB/Swiss-Prot;Acc:O22527]	chloroplast|chlorophyll catabolic process|chlorophyllase activity|vacuole|defense response to bacterium|defense response to fungus
AT1G19960	2.59866	2.70562e-32	8.6057e-31	32.365	29.1985	29.9148	8.15998	3.0354	5.38324		BEST Arabidopsis thaliana protein match is: transmembrane receptors (TAIR:AT2G32140.1); Has 41 Blast hits to 41 proteins in 17 species: Archae - 0; Bacteria - 2; Metazoa - 23; Fungi - 0; Plants - 11; Viruses - 0; Other Eukaryotes - 5 (source: NCBI BLink). [Source:TAIR;Acc:AT1G19960]	molecular_function|cellular_component|biological_process
AT1G20310	2.10148	0.000148895	0.000600631	1.0132	1.38224	1.92977	0.238122	0.11903	0.724568		unknown protein; FUNCTIONS IN: molecular_function unknown; INVOLVED IN: biological_process unknown; LOCATED IN: chloroplast; EXPRESSED IN: 16 plant structures; EXPRESSED DURING: 9 growth stages; BEST Arabidopsis thaliana protein match is: unknown pr /.../(TAIR:AT1G76070.1); Has 46 Blast hits to 46 proteins in 12 species: Archae - 0; Bacteria - 0; Metazoa - 0; Fungi - 0; Plants - 46; Viruses - 0; …	molecular_function|biological_process
AT1G20510	3.32243	7.92708e-215	4.42123e-212	48.4105	50.678	50.9941	5.7715	4.67531	5.61761	4CLL5	4-coumarate--CoA ligase-like 5 [Source:UniProtKB/Swiss-Prot;Acc:Q84P21]
AT1G20620	1.10818	1.01251e-11	1.00076e-10	694.942	646.986	714.662	231.501	403.3	372.736	CAT3	Catalase-3 [Source:UniProtKB/Swiss-Prot;Acc:Q42547]	catalase activity|nucleus|integral component of plasma membrane|response to oxidative stress|basic amino acid transmembrane transporter activity|L-amino acid transmembrane transporter activity|antiporter activity|heme binding|mitochondrial membrane|metal ion binding|oxidation-reduction process|peroxisome|chloroplast envelope|protein binding|mitochondrion|chloroplast|cellular response to nitrogen …
AT1G20680	1.8477	0.00259643	0.00805902	0.340518	1.02295	0.811972	0.242468	0.194947	0		Protein of unknown function (DUF833) [Source:TAIR;Acc:AT1G20680]	molecular_function|biological_process
AT1G20740	Inf	0.00889765	0.0241795	0.133845	0.141141	0.35781	0	0	0		Protein of unknown function (DUF833) [Source:TAIR;Acc:AT1G20740]	molecular_function|nucleus|biological_process
AT1G21120	2.18609	2.41585e-09	1.91705e-08	10.4728	13.8605	17.229	3.42025	2.64504	3.61331		O-methyltransferase family protein [Source:TAIR;Acc:AT1G21120]
AT1G21130	1.45175	1.67934e-49	9.19126e-48	161.65	157.409	186.038	62.2033	67.3238	70.1109		O-methyltransferase family protein [Source:TAIR;Acc:AT1G21130]
AT1G21230	Inf	2.09312e-08	1.50449e-07	0.185537	0.348919	0.337853	0	0	0	WAK5	Wall-associated receptor kinase 5 [Source:UniProtKB/Swiss-Prot;Acc:Q9LMN7]	protein serine/threonine kinase activity|calcium ion binding|ATP binding|extracellular region|protein phosphorylation|cell surface receptor signaling pathway|integral component of membrane|kinase activity|polysaccharide binding|plasma membrane
AT1G21240	Inf	1.54818e-37	5.90652e-36	1.39185	1.35973	1.38536	0	0	0	WAK3	Wall-associated receptor kinase 3 [Source:UniProtKB/Swiss-Prot;Acc:Q9LMN8]	protein serine/threonine kinase activity|calcium ion binding|ATP binding|protein phosphorylation|cell surface receptor signaling pathway|integral component of membrane|kinase activity|polysaccharide binding|plasma membrane
AT1G21250	8.35233	1.26446e-195	5.58867e-193	65.2373	63.6981	78.2383	0.231573	0.164678	0.264198	WAK1	Wall-associated receptor kinase 1 [Source:UniProtKB/Swiss-Prot;Acc:Q39191]	protein serine/threonine kinase activity|calcium ion binding|ATP binding|extracellular region|protein phosphorylation|integral component of membrane|kinase activity|polysaccharide binding|plasma membrane|protein binding|cell surface receptor signaling pathway|vacuole|response to salicylic acid|response to virus|defense response to fungus|plant-type cell wall|phosphorylation
AT1G21270	3.08688	3.01818e-115	5.84304e-113	23.9464	24.8482	28.0249	3.8994	2.76333	2.89589	WAK2	Wall-associated receptor kinase 2 [Source:UniProtKB/Swiss-Prot;Acc:Q9LMP1]	protein serine/threonine kinase activity|calcium ion binding|ATP binding|protein phosphorylation|cell surface receptor signaling pathway|integral component of membrane|polysaccharide binding|plasma membrane|response to salicylic acid|cell|oligosaccharide metabolic process|unidimensional cell growth|cellular water homeostasis
AT1G21320	3.13473	4.98877e-29	1.41479e-27	1.8571	1.96679	2.26125	0.298401	0.328381	0.133132		nucleotide binding;nucleic acid binding [Source:TAIR;Acc:AT1G21320]	nucleotide binding|nucleus|nuclear speck
AT1G21440	1.34912	3.718e-23	7.99029e-22	39.3668	38.8482	37.9835	19.9346	11.1058	17.588		Phosphoenolpyruvate carboxylase family protein [Source:TAIR;Acc:AT1G21440]	isocitrate lyase activity|chloroplast|chloroplast stroma
AT1G21520	2.60862	7.87467e-33	2.56557e-31	21.8149	21.0377	21.501	3.60655	3.30492	4.52663		unknown protein; Has 9 Blast hits to 9 proteins in 2 species: Archae - 0; Bacteria - 0; Metazoa - 0; Fungi - 0; Plants - 9; Viruses - 0; Other Eukaryotes - 0 (source: NCBI BLink). [Source:TAIR;Acc:AT1G21520]	molecular_function|endoplasmic reticulum|response to oxidative stress
AT1G21530	2.05907	0.0352466	0.0800748	0.114737	0.228972	0.295939	0	0.0567201	0.0287023	AEE10	Probable acyl-activating enzyme 10 [Source:UniProtKB/Swiss-Prot;Acc:Q9LPK7]	mitochondrion|fatty acid metabolic process|ligase activity
AT1G21750	1.12488	1.57859e-19	2.75958e-18	108.71	122.86	135.52	65.8625	59.3126	54.6298	PDIL1-1	Protein disulfide isomerase-like 1-1 [Source:UniProtKB/Swiss-Prot;Acc:Q9XI01]	protein disulfide isomerase activity|endoplasmic reticulum|endoplasmic reticulum lumen|protein folding|chloroplast|cell redox homeostasis|thylakoid|vacuole|membrane|plant-type cell wall|response to salt stress|response to endoplasmic reticulum stress|protein storage vacuole|lytic vacuole within protein storage vacuole|protein binding|embryo development ending in seed dormancy|regulation of progra…
AT1G22150	1.2953	0.000980422	0.00335276	0.963547	0.804286	0.863559	0.459372	0.15501	0.343259	SULTR1;3	Sulfate transporter 1.3 [Source:UniProtKB/Swiss-Prot;Acc:Q9FEP7]	integral component of plasma membrane|secondary active sulfate transmembrane transporter activity|sulfate transmembrane transporter activity|symporter activity
AT1G22340	2.99096	2.3883e-05	0.000111247	0.395562	0.785891	0.409096	0.0355326	0.108233	0.0360769	UGT85A7	UDP-glycosyltransferase 85A7 [Source:UniProtKB/Swiss-Prot;Acc:Q9LME8]	nucleus|UDP-glycosyltransferase activity|flavonoid biosynthetic process|transferase activity, transferring glycosyl groups|intracellular membrane-bounded organelle|flavonoid glucuronidation|quercetin 3-O-glucosyltransferase activity|quercetin 7-O-glucosyltransferase activity|glucuronosyltransferase activity
AT1G22360	1.35564	5.82771e-52	3.46482e-50	82.4917	90.8144	96.1515	39.3276	35.4206	36.8805	UGT85A2	UDP-glycosyltransferase 85A2 [Source:UniProtKB/Swiss-Prot;Acc:Q9ZWJ3]	nucleus|metabolic process|UDP-glycosyltransferase activity|flavonoid biosynthetic process|transferase activity, transferring glycosyl groups|transferase activity, transferring hexosyl groups|intracellular membrane-bounded organelle|flavonoid glucuronidation|quercetin 3-O-glucosyltransferase activity|quercetin 7-O-glucosyltransferase activity|glucuronosyltransferase activity
AT1G22400	2.64167	4.9378e-93	7.05292e-91	63.943	64.8752	73.892	12.3744	11.8035	9.90711	UGT85A1	UDP-glycosyltransferase 85A1 [Source:UniProtKB/Swiss-Prot;Acc:Q9SK82]	UDP-glycosyltransferase activity|flavonoid biosynthetic process|transferase activity, transferring glycosyl groups|transferase activity, transferring hexosyl groups|intracellular membrane-bounded organelle|flavonoid glucuronidation|quercetin 3-O-glucosyltransferase activity|quercetin 7-O-glucosyltransferase activity|trans-zeatin O-beta-D-glucosyltransferase activity|cis-zeatin O-beta-D-glucosyltr…
AT1G22570	1.03912	5.10705e-13	5.73777e-12	8.29099	8.37151	8.67045	3.8285	4.93689	4.38769	NPF5.15	Protein NRT1/ PTR FAMILY 5.15 [Source:UniProtKB/Swiss-Prot;Acc:Q9SK99]	transporter activity|plasma membrane|oligopeptide transport|membrane|integral component of membrane
AT1G22890	1.27126	2.73918e-14	3.39499e-13	30.189	29.1539	31.8702	14.9796	11.3215	13.1529		unknown protein; FUNCTIONS IN: molecular_function unknown; INVOLVED IN: biological_process unknown; LOCATED IN: endomembrane system; EXPRESSED IN: 19 plant structures; EXPRESSED DURING: 11 growth stages; Has 17 Blast hits to 17 proteins in 2 species /.../ae - 0; Bacteria - 0; Metazoa - 0; Fungi - 0; Plants - 17; Viruses - 0; Other Eukaryotes - 0 (source: NCBI BLink). [Source:TAIR;Acc:AT1G22890]	molecular_function|mitochondrion|biological_process
AT1G22900	2.17009	3.545e-30	1.04324e-28	14.2979	15.0577	14.8382	3.70905	3.1118	3.56592	DIR11	Dirigent protein 11 [Source:UniProtKB/Swiss-Prot;Acc:Q67YM6]	molecular_function|extracellular region|defense response|apoplast
AT1G23090	1.41296	1.02543e-42	4.60166e-41	30.0109	27.2091	27.963	9.79285	12.0154	12.4151	SULTR3;3	Probable sulfate transporter 3.3 [Source:UniProtKB/Swiss-Prot;Acc:Q9SXS2]
AT1G23140	1.53943	1.93151e-16	2.76902e-15	11.3967	13.0213	10.7153	5.78382	3.21799	4.47321		Calcium-dependent lipid-binding (CaLB domain) family protein [Source:TAIR;Acc:AT1G23140]
AT1G23830	1.37325	5.34041e-14	6.47511e-13	12.6295	10.5461	10.907	4.435	4.01045	5.43433		unknown protein; FUNCTIONS IN: molecular_function unknown; INVOLVED IN: biological_process unknown; LOCATED IN: endomembrane system; EXPRESSED IN: 12 plant structures; EXPRESSED DURING: 9 growth stages; BEST Arabidopsis thaliana protein match is: un /.../protein (TAIR:AT1G23840.1); Has 57 Blast hits to 52 proteins in 7 species: Archae - 0; Bacteria - 0; Metazoa - 0; Fungi - 0; Plants - 57; Viruse…	molecular_function|mitochondrion|biological_process|integral component of membrane
AT1G23840	3.87345	4.94373e-37	1.84995e-35	6.4263	6.92248	7.81112	0.467122	0.647431	0.416505		unknown protein; LOCATED IN: endomembrane system; EXPRESSED IN: 18 plant structures; EXPRESSED DURING: 12 growth stages; BEST Arabidopsis thaliana protein match is: unknown protein (TAIR:AT1G23850.1); Has 53 Blast hits to 48 proteins in 5 species: A /.../- 0; Bacteria - 0; Metazoa - 0; Fungi - 0; Plants - 53; Viruses - 0; Other Eukaryotes - 0 (source: NCBI BLink). [Source:TAIR;Acc:AT1G23840]	mitochondrion|integral component of membrane
AT1G23850	1.54577	3.26539e-35	1.15372e-33	24.1153	24.5797	24.6304	8.91018	8.31273	9.76192		unknown protein; BEST Arabidopsis thaliana protein match is: unknown protein (TAIR:AT1G23840.1); Has 47 Blast hits to 40 proteins in 5 species: Archae - 0; Bacteria - 0; Metazoa - 0; Fungi - 0; Plants - 47; Viruses - 0; Other Eukaryotes - 0 (source: /.../BLink). [Source:TAIR;Acc:AT1G23850]	molecular_function|biological_process|integral component of membrane
AT1G24020	1.39853	3.75937e-24	8.56646e-23	44.9296	38.2383	37.9329	17.055	15.2365	16.5139	MLP423	MLP-like protein 423 [Source:UniProtKB/Swiss-Prot;Acc:Q93VR4]	defense response|chloroplast|response to biotic stimulus|membrane
AT1G24070	2.07648	1.52617e-06	8.60627e-06	1.89505	1.17315	2.35458	0.430148	0.464722	0.412703	CSLA10	Probable mannan synthase 10 [Source:UniProtKB/Swiss-Prot;Acc:Q9LR87]	Golgi membrane|Golgi apparatus|integral component of membrane|transferase activity, transferring glycosyl groups|cellulose synthase activity|cell wall organization
AT1G24100	1.22582	2.9726e-30	8.79207e-29	58.9425	60.8549	58.2899	34.4814	24.5903	22.3742	UGT74B1	UDP-glycosyltransferase 74B1 [Source:UniProtKB/Swiss-Prot;Acc:O48676]	nucleus|UDP-glycosyltransferase activity|flavonoid biosynthetic process|transferase activity, transferring glycosyl groups|intracellular membrane-bounded organelle|flavonoid glucuronidation|quercetin 3-O-glucosyltransferase activity|quercetin 7-O-glucosyltransferase activity|UDP-glucose:5-methylthiopentylhydroximate S-glucosyltransferase activity|UDP-glucose: 6-methylthiohexylhydroximate S-glucos…
AT1G24140	1.72832	1.19074e-09	9.79051e-09	3.2621	3.17653	3.62264	0.708611	0.473464	1.85291		Matrixin family protein [Source:TAIR;Acc:AT1G24140]	metalloendopeptidase activity|extracellular region|plasma membrane|proteolysis|zinc ion binding|extracellular matrix|anchored component of membrane
AT1G24145	5.69448	5.68454e-64	4.57596e-62	61.7621	66.5484	85.3058	1.21733	1.4623	1.22079		unknown protein; FUNCTIONS IN: molecular_function unknown; INVOLVED IN: biological_process unknown; LOCATED IN: endomembrane system; Has 3 Blast hits to 3 proteins in 1 species: Archae - 0; Bacteria - 0; Metazoa - 0; Fungi - 0; Plants - 3; Viruses - /.../her Eukaryotes - 0 (source: NCBI BLink). [Source:TAIR;Acc:AT1G24145]	molecular_function|biological_process
AT1G24147	6.959	8.36168e-189	3.31987e-186	55.9338	50.9482	58.7681	0.512261	0.204572	0.517658		unknown protein; FUNCTIONS IN: molecular_function unknown; INVOLVED IN: biological_process unknown; LOCATED IN: endomembrane system; BEST Arabidopsis thaliana protein match is: unknown protein (TAIR:AT1G24148.1); Has 4 Blast hits to 4 proteins in 2 /.../s: Archae - 0; Bacteria - 0; Metazoa - 0; Fungi - 0; Plants - 4; Viruses - 0; Other Eukaryotes - 0 (source: NCBI BLink). [Source:TAIR;Acc:AT1G241…	molecular_function|extracellular region|biological_process
AT1G24320	1.72305	2.77193e-08	1.96052e-07	1.77477	2.93944	2.39052	0.72126	0.910385	0.675243	GCS2	Alpha-glucosidase 2 [Source:UniProtKB/Swiss-Prot;Acc:Q84M89]	nucleus|oligosaccharide metabolic process
AT1G24575	1.01747	9.49677e-08	6.30025e-07	19.2163	18.5421	21.1567	10.9009	8.82092	10.7512		unknown protein; Has 7 Blast hits to 7 proteins in 2 species: Archae - 0; Bacteria - 0; Metazoa - 0; Fungi - 0; Plants - 7; Viruses - 0; Other Eukaryotes - 0 (source: NCBI BLink). [Source:TAIR;Acc:AT1G24575]	molecular_function|biological_process
AT1G25220	1.73195	2.38849e-51	1.38149e-49	42.6411	41.1802	48.3171	16.7137	11.8714	14.1956	ASB1	Anthranilate synthase beta subunit 1, chloroplastic [Source:UniProtKB/Swiss-Prot;Acc:Q42565]	tryptophan biosynthetic process|anthranilate synthase activity|mitochondrion|cytosol|anthranilate synthase complex|glutamine metabolic process|metabolic process|chloroplast|response to ethylene|auxin biosynthetic process|regulation of auxin biosynthetic process|response to salt stress|lateral root formation|response to bacterium
AT1G25275	1.67983	1.85094e-78	2.0946e-76	43.1988	41.7177	48.0879	13.0551	14.02	18.9223		unknown protein; FUNCTIONS IN: molecular_function unknown; INVOLVED IN: response to karrikin; LOCATED IN: endomembrane system; EXPRESSED IN: 23 plant structures; EXPRESSED DURING: 13 growth stages; Has 18 Blast hits to 18 proteins in 4 species: Arch /.../; Bacteria - 0; Metazoa - 0; Fungi - 0; Plants - 18; Viruses - 0; Other Eukaryotes - 0 (source: NCBI BLink). [Source:TAIR;Acc:AT1G25275]	molecular_function|extracellular region|response to karrikin
AT1G25400	1.11482	9.66443e-12	9.56844e-11	36.7905	36.7106	40.4283	13.6938	18.6049	23.8141		unknown protein; BEST Arabidopsis thaliana protein match is: unknown protein (TAIR:AT1G68440.1); Has 21 Blast hits to 21 proteins in 6 species: Archae - 0; Bacteria - 0; Metazoa - 0; Fungi - 0; Plants - 21; Viruses - 0; Other Eukaryotes - 0 (source: /.../BLink). [Source:TAIR;Acc:AT1G25400]	molecular_function|nucleus|biological_process|integral component of membrane
AT1G25460	1.66847	0.00022346	0.000871697	0.679327	0.849097	1.29731	0.222075	0.336286	0.113136		NAD(P)-binding Rossmann-fold superfamily protein [Source:TAIR;Acc:AT1G25460]	catalytic activity|cellular_component|oxidoreductase activity|coenzyme binding
AT1G26380	5.79693	9.0673e-55	5.85128e-53	15.2099	15.9363	20.7643	0.570376	0.100619	0.329476		FAD-binding Berberine family protein [Source:TAIR;Acc:AT1G26380]
AT1G26390	Inf	2.31947e-09	1.84432e-08	1.3268	1.14366	2.72733	0	0	0		FAD-binding Berberine family protein [Source:TAIR;Acc:AT1G26390]	cytoplasm|electron carrier activity|oxidoreductase activity, acting on CH-OH group of donors|flavin adenine dinucleotide binding|oxidation-reduction process
AT1G26410	6.14916	1.29734e-06	7.3906e-06	0.558666	0.307865	0.896618	0.0275225	0	0		FAD-binding Berberine family protein [Source:TAIR;Acc:AT1G26410]	cytoplasm|electron carrier activity|oxidoreductase activity, acting on CH-OH group of donors|flavin adenine dinucleotide binding|oxidation-reduction process|cellular response to hypoxia
AT1G26420	4.30801	4.93303e-33	1.62755e-31	11.5418	13.142	16.7978	0.730323	0.51746	0.931004		FAD-binding Berberine family protein [Source:TAIR;Acc:AT1G26420]	cytoplasm|electron carrier activity|oxidoreductase activity, acting on CH-OH group of donors|flavin adenine dinucleotide binding|oxidation-reduction process
AT1G26560	1.09191	2.90984e-24	6.66304e-23	23.1486	23.8261	19.8029	11.7413	11.5364	11.3641	BGLU40	Beta-glucosidase 40 [Source:UniProtKB/Swiss-Prot;Acc:Q9FZE0]	hydrolase activity, hydrolyzing O-glycosyl compounds|extracellular region|carbohydrate metabolic process|beta-glucosidase activity|glycosyl compound metabolic process|chloroplast|apoplast
AT1G26690	1.05282	3.05408e-17	4.64557e-16	27.3315	29.369	29.0582	15.4784	14.5045	14.667		Transmembrane emp24 domain-containing protein p24delta9 [Source:UniProtKB/Swiss-Prot;Acc:Q9LQY3]	extracellular region|endoplasmic reticulum membrane|intracellular protein transport|protein transmembrane transporter activity|protein transport|membrane|integral component of membrane|vesicle-mediated transport|Golgi cisterna membrane|endoplasmic reticulum-Golgi intermediate compartment membrane
AT1G26730	1.8185	1.87237e-16	2.69246e-15	2.55919	2.92662	2.52979	0.54366	0.902472	0.790267	PHO1-H7	Phosphate transporter PHO1 homolog 7 [Source:UniProtKB/Swiss-Prot;Acc:Q6R8G3]	plasma membrane|phosphate ion transport|integral component of membrane
AT1G27020	3.29106	1.63191e-240	1.23315e-237	127.093	131.922	139.372	12.4045	13.9591	17.1355		unknown protein; BEST Arabidopsis thaliana protein match is: unknown protein (TAIR:AT1G27030.1); Has 514 Blast hits to 514 proteins in 175 species: Archae - 0; Bacteria - 311; Metazoa - 0; Fungi - 0; Plants - 65; Viruses - 0; Other Eukaryotes - 138 /.../e: NCBI BLink). [Source:TAIR;Acc:AT1G27020]	molecular_function|nucleus|biological_process
AT1G27040	1.80213	0.0393357	0.087974	0.293819	0.229568	0.203874	0.0649388	0.0324372	0.130229	NPF4.5	Protein NRT1/ PTR FAMILY 4.5 [Source:UniProtKB/Swiss-Prot;Acc:Q8VYE4]	transporter activity|plasma membrane|transport|integral component of membrane
AT1G27330	1.12131	8.70999e-29	2.43474e-27	156.332	174.721	167.758	85.3716	77.2031	84.4892		Ribosome associated membrane protein RAMP4 [Source:TAIR;Acc:AT1G27330]	molecular_function|mitochondrion|response to oxidative stress
AT1G27980	1.08931	3.48965e-31	1.06301e-29	44.5075	49.1317	51.0955	22.9092	23.8872	25.2716	DPL1	Sphingosine-1-phosphate lyase [Source:UniProtKB/Swiss-Prot;Acc:Q9C509]	endoplasmic reticulum membrane|cellular amino acid metabolic process|sphinganine-1-phosphate aldolase activity|integral component of membrane|carboxy-lyase activity|carboxylic acid metabolic process|pyridoxal phosphate binding|endoplasmic reticulum|membrane|sphingolipid catabolic process
AT1G28190	2.04065	3.316e-53	2.03878e-51	22.6115	22.0575	23.4376	5.35376	6.38115	5.6304		unknown protein; BEST Arabidopsis thaliana protein match is: unknown protein (TAIR:AT5G12340.1); Has 166 Blast hits to 162 proteins in 36 species: Archae - 0; Bacteria - 2; Metazoa - 15; Fungi - 5; Plants - 124; Viruses - 0; Other Eukaryotes - 20 (s /.../ NCBI BLink). [Source:TAIR;Acc:AT1G28190]	molecular_function|biological_process|nucleus
AT1G28370	2.27461	3.37247e-35	1.18976e-33	30.2157	31.551	34.8419	6.3266	4.85947	10.3439	ERF11	Ethylene-responsive transcription factor 11 [Source:UniProtKB/Swiss-Prot;Acc:Q9C5I3]	DNA binding|nucleus|transcription, DNA-templated|regulation of transcription, DNA-templated|transcription factor activity, sequence-specific DNA binding|vasculature development|cell division|intracellular|ethylene-activated signaling pathway
AT1G28390	1.77182	3.51223e-29	1.00212e-27	7.97915	8.14432	8.47661	2.89753	2.60617	2.04761		Serine/threonine-protein kinase-like protein At1g28390 [Source:UniProtKB/Swiss-Prot;Acc:Q9SGN7]	protein serine/threonine kinase activity|ATP binding|plasma membrane|protein phosphorylation|kinase activity|phosphorylation
AT1G28480	3.75974	8.25283e-69	7.58127e-67	21.8553	21.8303	20.9576	1.64888	1.75394	1.83218	GRXC9	Glutaredoxin-C9 [Source:UniProtKB/Swiss-Prot;Acc:Q9SGP6]
AT1G29020	1.93275	9.53304e-11	8.61873e-10	1.52322	1.47901	1.57075	0.40477	0.284853	0.477635		Calcium-binding EF-hand family protein [Source:TAIR;Acc:AT1G29020]	calcium ion binding|extracellular region|integral component of membrane|vacuole
AT1G29025	1.18963	4.1582e-09	3.21471e-08	20.3145	24.8066	18.1402	9.62432	11.1159	9.5136		Calcium-binding EF-hand family protein [Source:TAIR;Acc:AT1G29025]	integral component of membrane
AT1G29195	1.25347	0.000162896	0.000652393	3.55084	4.01453	2.26466	1.69315	1.12825	1.61512		unknown protein; FUNCTIONS IN: molecular_function unknown; INVOLVED IN: biological_process unknown; LOCATED IN: chloroplast; EXPRESSED IN: 13 plant structures; EXPRESSED DURING: 4 anthesis, C globular stage, 4 leaf senescence stage, petal differenti /.../and expansion stage; BEST Arabidopsis thaliana protein match is: unknown protein (TAIR:AT2G30230.1); Has 180 Blast hits to 180 proteins in 14 sp…	molecular_function|biological_process|chloroplast
AT1G29270	3.01964	1.07607e-20	2.01495e-19	5.50724	5.98094	5.97363	1.07939	0.83924	0.766232		unknown protein; BEST Arabidopsis thaliana protein match is: unknown protein (TAIR:AT2G40435.1); Has 98 Blast hits to 98 proteins in 15 species: Archae - 0; Bacteria - 0; Metazoa - 0; Fungi - 0; Plants - 98; Viruses - 0; Other Eukaryotes - 0 (source /.../ BLink). [Source:TAIR;Acc:AT1G29270]	molecular_function|biological_process|chloroplast
AT1G29830	2.48452	0.000223561	0.000871948	0.245975	0.318815	0.293858	0.111095	0.0375525	0.0188246		Magnesium transporter CorA-like family protein [Source:TAIR;Acc:AT1G29830]	nucleus|integral component of membrane|metal ion transport
AT1G29860	3.31164	0.0018404	0.00591133	0.243408	0.194529	0.455425	0	0	0.0486872	WRKY71	Probable WRKY transcription factor 71 [Source:UniProtKB/Swiss-Prot;Acc:Q93WV4]	transcription factor activity, sequence-specific DNA binding|nucleus|transcription, DNA-templated|regulation of transcription, DNA-templated|sequence-specific DNA binding
AT1G29980	1.20282	2.18739e-16	3.12437e-15	11.2062	13.6913	13.5721	5.1689	5.8978	6.7044		Protein of unknown function, DUF642 [Source:TAIR;Acc:AT1G29980]	extracellular region|nucleus|biological_process|anchored component of membrane|plasma membrane
AT1G30040	1.69148	9.34337e-18	1.47287e-16	3.90946	3.69735	4.61224	1.26063	1.2309	1.55844	GA2OX2	Gibberellin 2-beta-dioxygenase 2 [Source:UniProtKB/Swiss-Prot;Acc:Q9XFR9]	iron ion binding|cytoplasm|gibberellin biosynthetic process|gibberellin 2-beta-dioxygenase activity|oxidation-reduction process|gibberellin catabolic process|C-19 gibberellin 2-beta-dioxygenase activity|response to red or far red light|response to red light
AT1G30135	6.19797	5.33578e-29	1.50955e-27	10.0006	8.78759	6.71937	0	0	0.139198	TIFY5A	Protein TIFY 5A [Source:UniProtKB/Swiss-Prot;Acc:Q8LBM2]
AT1G30160	1.35414	0.0222605	0.0538857	0.602015	0.641213	0.499	0.313818	0.27652	0.0799187		Protein of unknown function (DUF295) [Source:TAIR;Acc:AT1G30160]	molecular_function|nucleus|biological_process|chloroplast
AT1G30190	4.87471	9.64708e-17	1.41505e-15	1.35201	1.75528	2.27643	0.0630709	0.0641078	0.065407		unknown protein; BEST Arabidopsis thaliana protein match is: unknown protein (TAIR:AT2G34610.1); Has 56 Blast hits to 56 proteins in 13 species: Archae - 0; Bacteria - 0; Metazoa - 0; Fungi - 0; Plants - 44; Viruses - 0; Other Eukaryotes - 12 (sourc /.../I BLink). [Source:TAIR;Acc:AT1G30190]	molecular_function|nucleus|biological_process|integral component of membrane
AT1G30220	3.25627	1.50101e-13	1.75806e-12	1.10477	1.26218	1.28124	0.0558891	0.255547	0.0853973	INT2	Probable inositol transporter 2 [Source:UniProtKB/Swiss-Prot;Acc:Q9C757]	sugar:proton symporter activity|glucose transmembrane transporter activity|plasma membrane|integral component of plasma membrane|carbohydrate transmembrane transporter activity|membrane|hexose transmembrane transport|glucose import|myo-inositol:proton symporter activity|myo-inositol transport|signaling|pollen tube
AT1G30370	1.68588	1.13676e-05	5.61785e-05	3.19444	4.51634	5.35376	0.865878	1.25956	2.23016		alpha/beta-Hydrolases superfamily protein [Source:TAIR;Acc:AT1G30370]
AT1G30420	1.66277	1.30953e-52	7.90614e-51	7.99392	8.91419	9.91803	3.23861	2.78445	3.09719	ABCC11	ABC transporter C family member 11 [Source:UniProtKB/Swiss-Prot;Acc:Q9C8H1]	ATP binding|cytoplasm|xenobiotic-transporting ATPase activity|integral component of membrane|ATPase activity, coupled to transmembrane movement of substances|transmembrane transport
AT1G30720	1.64466	9.84684e-07	5.71654e-06	15.1998	22.439	25.3089	5.53859	7.4447	8.62053		FAD-binding Berberine family protein [Source:TAIR;Acc:AT1G30720]	electron carrier activity|oxidoreductase activity, acting on CH-OH group of donors|flavin adenine dinucleotide binding|oxidation-reduction process
AT1G30730	2.78507	2.74757e-27	7.15132e-26	23.67	29.7606	33.3289	3.34273	4.42229	5.45254		FAD-binding Berberine family protein [Source:TAIR;Acc:AT1G30730]	cytoplasm|electron carrier activity|oxidoreductase activity, acting on CH-OH group of donors|flavin adenine dinucleotide binding|oxidation-reduction process
AT1G30740	Inf	0.00083849	0.00290815	0.122543	0.182659	0.219807	0	0	0		FAD-binding Berberine family protein [Source:TAIR;Acc:AT1G30740]	electron carrier activity|oxidoreductase activity, acting on CH-OH group of donors|flavin adenine dinucleotide binding|oxidation-reduction process|plasmodesma|vacuole
AT1G30755	1.6324	4.30266e-38	1.66595e-36	10.7215	11.065	12.2781	3.20414	3.74372	4.57337		Protein of unknown function (DUF668) [Source:TAIR;Acc:AT1G30755]
AT1G30757	1.47575	3.45771e-05	0.000156335	4.35091	4.5475	3.47725	1.33266	0.730535	0.733492		unknown protein; FUNCTIONS IN: molecular_function unknown; INVOLVED IN: biological_process unknown; LOCATED IN: endomembrane system; Has 2 Blast hits to 2 proteins in 1 species: Archae - 0; Bacteria - 0; Metazoa - 0; Fungi - 0; Plants - 2; Viruses - /.../her Eukaryotes - 0 (source: NCBI BLink). [Source:TAIR;Acc:AT1G30757]	molecular_function|biological_process
AT1G30760	1.17693	6.95297e-07	4.10674e-06	9.05581	12.2051	13.5987	5.07051	6.20024	5.1175		FAD-binding Berberine family protein [Source:TAIR;Acc:AT1G30760]
AT1G30814	Inf	1.27365e-12	1.37744e-11	0.84889	0.459917	0.358926	0	0	0		unknown protein; Has 35333 Blast hits to 34131 proteins in 2444 species: Archae - 798; Bacteria - 22429; Metazoa - 974; Fungi - 991; Plants - 531; Viruses - 0; Other Eukaryotes - 9610 (source: NCBI BLink). [Source:TAIR;Acc:AT1G30814]	molecular_function|nucleus|biological_process
AT1G31550	3.34963	2.63298e-73	2.70516e-71	15.2508	13.525	15.5777	2.06077	1.25319	1.46457		GDSL esterase/lipase At1g31550 [Source:UniProtKB/Swiss-Prot;Acc:Q9C857]	extracellular region|lipid catabolic process|lipase activity|hydrolase activity, acting on ester bonds|carboxylic ester hydrolase activity|vacuole
AT1G31580	3.63519	5.68403e-222	3.5039e-219	1651.21	1591.58	1805.45	149.332	140.961	139.207	ECS1	ECS1 [Source:TAIR;Acc:AT1G31580]	molecular_function|mitochondrion|defense response|cell wall
AT1G31690	4.42821	5.90545e-06	3.03966e-05	0.244654	0.325557	0.188914	0	0	0.040849		Copper amine oxidase family protein [Source:TAIR;Acc:AT1G31690]	copper ion binding|primary amine oxidase activity|chloroplast|quinone binding|oxidation-reduction process
AT1G32350	8.44178	5.15022e-39	2.04135e-37	4.10307	3.50807	5.47743	0	0	0	AOX3	Ubiquinol oxidase 3, mitochondrial [Source:UniProtKB/Swiss-Prot;Acc:Q8LEE7]
AT1G32910	6.42247	6.04356e-13	6.74788e-12	1.00797	0.889531	0.806614	0	0.0367911	0		HXXXD-type acyl-transferase family protein [Source:TAIR;Acc:AT1G32910]	cytoplasm|transferase activity|transferase activity, transferring acyl groups other than amino-acyl groups
AT1G32960	8.67029	6.86232e-101	1.14821e-98	4.21189	4.69558	5.24434	0	0.0379454	0	SBT3.3	Subtilisin-like protease SBT3.3 [Source:UniProtKB/Swiss-Prot;Acc:Q9MAP5]	serine-type endopeptidase activity|extracellular region|proteinaceous extracellular matrix|proteolysis|metabolic process|apoplast|plant-type cell wall|induced systemic resistance|extracellular matrix
AT1G32970	3.22705	3.62383e-16	5.09839e-15	0.8601	0.906171	0.866375	0.0449786	0.0671172	0.180807		Subtilisin-like serine endopeptidase family protein [Source:TAIR;Acc:AT1G32970]	serine-type endopeptidase activity|extracellular region|cell wall|proteolysis|metabolic process
AT1G33030	7.00368	3.62113e-100	5.97359e-98	10.5887	12.2291	13.7894	0.143284	0.0964514	0.0968816		O-methyltransferase family protein [Source:TAIR;Acc:AT1G33030]	methylation|protein dimerization activity|cytosol|O-methyltransferase activity|lignin biosynthetic process
AT1G33055	1.60477	1.28026e-28	3.54494e-27	23.5706	24.2556	22.1075	5.79277	9.44545	9.45696		unknown protein; FUNCTIONS IN: molecular_function unknown; INVOLVED IN: anaerobic respiration; LOCATED IN: endomembrane system; EXPRESSED IN: 13 plant structures; EXPRESSED DURING: 6 growth stages; Has 20 Blast hits to 20 proteins in 8 species: Arch /.../; Bacteria - 0; Metazoa - 0; Fungi - 0; Plants - 20; Viruses - 0; Other Eukaryotes - 0 (source: NCBI BLink). [Source:TAIR;Acc:AT1G33055]	molecular_function|mitochondrion|anaerobic respiration
AT1G33265	1.22865	1.58495e-12	1.69997e-11	16.704	17.6489	18.6127	8.32985	6.94705	7.98722	FAX4	Protein FATTY ACID EXPORT 4, chloroplastic [Source:UniProtKB/Swiss-Prot;Acc:Q8LPG1]	chloroplast|integral component of membrane|chloroplast membrane
AT1G33560	1.61969	6.20637e-28	1.66153e-26	10.9528	13.7176	12.3452	3.9743	4.00474	4.86502	ADR1	Disease resistance protein ADR1 [Source:UniProtKB/Swiss-Prot;Acc:Q9FW44]	ATP binding|defense response|plant-type hypersensitive response|ADP binding|kinase activity|response to other organism|response to water deprivation|response to karrikin|defense response to bacterium
AT1G33590	1.69801	2.01419e-39	8.12088e-38	202.005	199.574	231.164	59.8221	68.1022	79.3628		Leucine-rich repeat (LRR) family protein [Source:TAIR;Acc:AT1G33590]	plasma membrane|defense response|signal transduction|cell wall|chloroplast|plant-type cell wall|response to karrikin|cytosol
AT1G33610	1.19923	3.89976e-16	5.48002e-15	28.9911	33.0513	36.9418	13.7653	14.3264	17.7316		Leucine-rich repeat (LRR) family protein [Source:TAIR;Acc:AT1G33610]	plasma membrane|signal transduction
AT1G33612	2.3576	1.298e-05	6.35704e-05	0.557906	0.734652	1.18013	0.25356	0.147396	0.149261		Leucine-rich repeat (LRR) family protein [Source:TAIR;Acc:AT1G33612]	plasma membrane
AT1G33720	4.34579	4.38403e-19	7.47423e-18	1.34379	1.9167	2.30793	0.0868348	0.0588734	0.148734	CYP76C6	cytochrome P450, family 76, subfamily C, polypeptide 6 [Source:TAIR;Acc:AT1G33720]	iron ion binding|membrane|oxidoreductase activity, acting on paired donors, with incorporation or reduction of molecular oxygen, NAD(P)H as one donor, and incorporation of one atom of oxygen|oxygen binding|heme binding|secondary metabolite biosynthetic process|oxidation-reduction process|endoplasmic reticulum
AT1G33730	Inf	1.66859e-05	7.98179e-05	0.26503	0.393226	0.136726	0	0	0	CYP76C5	cytochrome P450, family 76, subfamily C, polypeptide 5 [Source:TAIR;Acc:AT1G33730]	iron ion binding|membrane|oxidoreductase activity, acting on paired donors, with incorporation or reduction of molecular oxygen, NAD(P)H as one donor, and incorporation of one atom of oxygen|oxygen binding|heme binding|secondary metabolite biosynthetic process|oxidation-reduction process
AT1G33790	1.78717	1.99177e-38	7.80222e-37	40.4514	43.0353	45.058	8.49079	14.0209	16.3527	JAL4	Jacalin-related lectin 4 [Source:UniProtKB/Swiss-Prot;Acc:Q9LQ31]	cytoplasm|carbohydrate binding|chloroplast
AT1G33840	3.9763	0.0154183	0.0391558	0.248583	0.0822412	0	0	0	0		Protein of unknown function (DUF567) [Source:TAIR;Acc:AT1G33840]	molecular_function|biological_process|chloroplast
AT1G33910	2.61492	0.0124681	0.0325347	0.162725	0.109487	0.227495	0	0.0542897	0.108809		P-loop containing nucleoside triphosphate hydrolases superfamily protein [Source:TAIR;Acc:AT1G33910]	GTP binding|mitochondrion|response to bacterium
AT1G33940	Inf	5.38142e-05	0.000235274	0.136991	0.0273513	0.0854136	0	0	0		BEST Arabidopsis thaliana protein match is: Protein kinase family protein with ARM repeat domain (TAIR:AT5G18700.1); Has 128 Blast hits to 95 proteins in 44 species: Archae - 0; Bacteria - 0; Metazoa - 37; Fungi - 0; Plants - 78; Viruses - 0; Other /.../otes - 13 (source: NCBI BLink). [Source:TAIR;Acc:AT1G33940]	molecular_function|nucleus|biological_process
AT1G33950	6.473	3.61117e-109	6.55749e-107	8.43103	8.901	10.6219	0.0521202	0	0.317729		Avirulence induced gene (AIG1) family protein [Source:TAIR;Acc:AT1G33950]	GTP binding|response to bacterium
AT1G33960	10.997	2.31426e-235	1.69411e-232	243.427	257.696	306.681	0.0618746	0.0314574	0.221609	AIG1	Protein AIG1 [Source:UniProtKB/Swiss-Prot;Acc:P54120]	GTP binding|chloroplast|response to bacterium
AT1G34180	2.34249	5.72007e-35	2.00588e-33	4.35657	4.58005	5.29091	0.957329	0.872436	1.03712	NAC016	NAC domain-containing protein 16 [Source:UniProtKB/Swiss-Prot;Acc:A4FVP6]	DNA binding|nucleus|transcription, DNA-templated|multicellular organism development|integral component of membrane|transcription factor activity, sequence-specific DNA binding|response to chitin|positive regulation of transcription, DNA-templated|positive regulation of leaf senescence
AT1G34380	1.43133	2.64798e-07	1.65747e-06	2.04858	2.00367	2.00696	0.929239	0.529685	0.685088		5'-3' exonuclease family protein [Source:TAIR;Acc:AT1G34380]
AT1G34420	2.26588	5.54407e-47	2.81713e-45	5.09348	6.50196	6.36957	1.34326	1.12757	1.33314		leucine-rich repeat transmembrane protein kinase family protein [Source:TAIR;Acc:AT1G34420]	protein kinase activity|ATP binding|plasma membrane|protein phosphorylation|integral component of membrane
AT1G34440	Inf	0.0262827	0.0623087	0	0	0	0	0	0		unknown protein; BEST Arabidopsis thaliana protein match is: unknown protein (TAIR:AT4G05095.1); Has 28 Blast hits to 28 proteins in 2 species: Archae - 0; Bacteria - 0; Metazoa - 0; Fungi - 0; Plants - 28; Viruses - 0; Other Eukaryotes - 0 (source: /.../BLink). [Source:TAIR;Acc:AT1G34440]	molecular_function|mitochondrion|biological_process|integral component of membrane
AT1G34750	1.16821	1.30842e-19	2.30623e-18	14.047	13.0623	15.5041	7.16375	5.73085	7.75317		Probable protein phosphatase 2C 10 [Source:UniProtKB/Swiss-Prot;Acc:Q9S9Z7]	protein serine/threonine phosphatase activity|nucleus|protein dephosphorylation|metal ion binding|plasma membrane
AT1G35210	1.29385	3.25741e-06	1.7488e-05	7.1687	6.01376	7.40574	1.9746	2.3977	4.65766		unknown protein; FUNCTIONS IN: molecular_function unknown; INVOLVED IN: biological_process unknown; LOCATED IN: chloroplast; EXPRESSED IN: 14 plant structures; EXPRESSED DURING: 9 growth stages; CONTAINS InterPro DOMAIN/s: Protein of unknown functio /.../40 (InterPro:IPR008004); BEST Arabidopsis thaliana protein match is: unknown protein (TAIR:AT1G22470.1); Has 83 Blast hits to 83 proteins in 12 …	molecular_function|mitochondrion|response to UV-B
AT1G35230	3.90803	3.56102e-50	1.99086e-48	30.4079	27.1728	34.8632	2.76863	1.58525	1.92305	AGP5	Classical arabinogalactan protein 5 [Source:UniProtKB/Swiss-Prot;Acc:Q8LCE4]	plasma membrane|anchored component of membrane
AT1G35310	1.7355	1.12972e-07	7.43053e-07	6.2576	4.71334	4.52064	2.01172	1.17094	1.41916	MLP168	MLP-like protein 168 [Source:UniProtKB/Swiss-Prot;Acc:Q9C7I3]	molecular_function|nucleus|defense response|response to biotic stimulus
AT1G35350	1.20667	1.75766e-28	4.83254e-27	15.7653	16.282	16.4715	7.75702	7.62564	6.92348	PHO1-H8	Phosphate transporter PHO1 homolog 8 [Source:UniProtKB/Swiss-Prot;Acc:Q6R8G2]	plasma membrane|phosphate ion transport|integral component of membrane
AT1G35625	4.12859	1.33884e-17	2.09501e-16	1.66548	2.44415	1.84202	0	0.123763	0.185826		RING/U-box superfamily protein [Source:TAIR;Acc:AT1G35625]	peptidase activity|zinc ion binding|protein transport|integral component of membrane|late endosome membrane|protein storage vacuole membrane
AT1G35710	6.35897	1.79371e-145	4.82961e-143	29.8813	30.2909	36.5343	0.370692	0.337678	0.566621		Probable leucine-rich repeat receptor-like protein kinase At1g35710 [Source:UniProtKB/Swiss-Prot;Acc:Q9LP24]	protein serine/threonine kinase activity|ATP binding|plasma membrane|protein phosphorylation|transmembrane receptor protein tyrosine kinase signaling pathway|integral component of membrane
AT1G35910	1.94303	0.000117482	0.000482218	1.16646	1.77104	2.60531	0.698049	0.512721	0.389946	TPPD	Probable trehalose-phosphate phosphatase D [Source:UniProtKB/Swiss-Prot;Acc:Q67XC9]	trehalose-phosphatase activity|cytoplasm|trehalose biosynthetic process|response to osmotic stress|response to oxidative stress|chloroplast|response to salt stress|trehalase activity
AT1G36622	2.16131	4.36807e-19	7.45245e-18	15.2489	18.082	18.2575	2.23037	3.19784	4.33873		unknown protein; LOCATED IN: endomembrane system; BEST Arabidopsis thaliana protein match is: unknown protein (TAIR:AT1G36640.1); Has 12 Blast hits to 12 proteins in 2 species: Archae - 0; Bacteria - 0; Metazoa - 0; Fungi - 0; Plants - 12; Viruses - /.../her Eukaryotes - 0 (source: NCBI BLink). [Source:TAIR;Acc:AT1G36622]	extracellular region
AT1G43160	1.08124	7.8014e-18	1.23897e-16	42.0018	49.0306	43.1942	22.7307	18.4258	26.6241	RAP2-6	Ethylene-responsive transcription factor RAP2-6 [Source:UniProtKB/Swiss-Prot;Acc:Q7G1L2]
AT1G43800	1.14569	4.52212e-05	0.000200285	4.33677	3.34136	3.10906	1.38809	2.43604	1.46778	S-ACP-DES6	Acyl-[acyl-carrier-protein] desaturase 6, chloroplastic [Source:UniProtKB/Swiss-Prot;Acc:Q84VY3]
AT1G43910	4.35965	4.85161e-59	3.4755e-57	56.4476	57.4733	72.3023	3.57074	2.90794	3.08818		P-loop containing nucleoside triphosphate hydrolases superfamily protein [Source:TAIR;Acc:AT1G43910]	ATP binding|plasma membrane|integral component of membrane|ATPase activity|cellular response to potassium ion starvation|response to abscisic acid|plasmodesma|Golgi apparatus|endoplasmic reticulum
AT1G44010	2.88863	0.0485914	0.105257	0.382483	0.657052	0.295939	0	0.0961168	0		unknown protein; BEST Arabidopsis thaliana protein match is: unknown protein (TAIR:AT1G15640.1); Has 211 Blast hits to 210 proteins in 16 species: Archae - 0; Bacteria - 0; Metazoa - 0; Fungi - 0; Plants - 211; Viruses - 0; Other Eukaryotes - 0 (sou /.../CBI BLink). [Source:TAIR;Acc:AT1G44010]	molecular_function|nucleus|biological_process|integral component of membrane
AT1G44050	1.18717	0.00742293	0.0205583	0.506118	0.657921	0.572182	0.26326	0.372384	0.196376		Cysteine/Histidine-rich C1 domain family protein [Source:TAIR;Acc:AT1G44050]	extracellular region|intracellular signal transduction|protein-disulfide reductase activity|oxidation-reduction process
AT1G44130	2.75865	8.60697e-22	1.72176e-20	3.22754	3.33073	3.97067	0.29399	0.344965	0.648107		Eukaryotic aspartyl protease family protein [Source:TAIR;Acc:AT1G44130]	extracellular region|plant-type cell wall|Golgi apparatus
AT1G44350	1.03409	1.58161e-25	3.79993e-24	33.6045	35.0645	33.4156	14.9243	19.176	18.7967	ILL6	IAA-amino acid hydrolase ILR1-like 6 [Source:UniProtKB/Swiss-Prot;Acc:Q8VYX0]	extracellular region|proteolysis|metallopeptidase activity|auxin metabolic process|IAA-amino acid conjugate hydrolase activity|regulation of systemic acquired resistance|jasmonic acid metabolic process|response to jasmonic acid|jasmonyl-Ile conjugate hydrolase activity
AT1G44790	1.10656	1.2083e-19	2.13779e-18	29.7835	31.5054	28.5381	15.1767	13.8609	13.899		ChaC-like family protein [Source:TAIR;Acc:AT1G44790]	molecular_function|cytoplasm|biological_process|cytosol
AT1G45015	1.1994	7.87462e-11	7.19154e-10	6.78267	6.83047	6.57357	2.73629	4.43019	1.90986		MD-2-related lipid recognition domain-containing protein [Source:TAIR;Acc:AT1G45015]	molecular_function|extracellular region|biological_process
AT1G45201	1.01217	3.0151e-33	1.00183e-31	177.782	169.643	170.049	99.5155	78.6133	93.631	ATTLL1	triacylglycerol lipase-like 1 [Source:TAIR;Acc:AT1G45201]
AT1G45616	1.74383	4.42781e-08	3.05332e-07	1.22207	1.1495	1.0261	0.197753	0.483584	0.346006	AtRLP6	receptor like protein 6 [Source:TAIR;Acc:AT1G45616]
AT1G47510	2.58046	1.07029e-14	1.37228e-13	2.07414	1.85631	2.3616	0.315814	0.361056	0.436623	AT5PTASE11	Type I inositol 1,4,5-trisphosphate 5-phosphatase 11 [Source:UniProtKB/Swiss-Prot;Acc:Q5EAF2]
AT1G47840	1.16302	4.96856e-14	6.04616e-13	6.22566	6.98093	6.32831	3.18247	2.75031	3.10941	HXK3	Hexokinase-like 1 protein [Source:UniProtKB/Swiss-Prot;Acc:Q9FZG4]	cellular glucose homeostasis|hexokinase activity|ATP binding|glucose binding|cytosol|glycolytic process|chloroplast|mannokinase activity|carbohydrate phosphorylation|glucokinase activity|fructokinase activity
AT1G47890	2.52787	2.10454e-05	9.88943e-05	0.306756	0.339032	0.509691	0.129063	0.056524	0.0381397	AtRLP7	receptor like protein 7 [Source:TAIR;Acc:AT1G47890]
AT1G48320	1.10483	3.98883e-15	5.27006e-14	41.5294	40.5344	43.8271	16.6788	17.0795	25.5935	DHNAT1	1,4-dihydroxy-2-naphthoyl-CoA thioesterase 1 [Source:UniProtKB/Swiss-Prot;Acc:Q9SX65]	chloroplast|hydrolase activity|hydrolase activity, acting on ester bonds|phylloquinone biosynthetic process|acyl-CoA hydrolase activity|peroxisome|protein homotetramerization
AT1G48510	1.02268	0.00291323	0.00892526	0.829062	1.29237	0.975422	0.600213	0.64265	0.286312		Surfeit locus protein 1-like [Source:UniProtKB/Swiss-Prot;Acc:Q9LP74]	molecular_function|mitochondrial inner membrane|biological_process|chloroplast|membrane|integral component of membrane
AT1G48605	1.95015	1.59366e-12	1.70619e-11	6.15816	6.60647	7.84267	0.881104	1.20653	2.39355	HAL3B	Probable phosphopantothenoylcysteine decarboxylase [Source:UniProtKB/Swiss-Prot;Acc:P94063]
AT1G49050	1.11008	8.49985e-25	1.99308e-23	16.814	17.6333	18.7915	8.60241	7.77355	9.83359		Eukaryotic aspartyl protease family protein [Source:TAIR;Acc:AT1G49050]
AT1G49130	1.09598	1.94238e-19	3.37789e-18	16.9533	17.2825	18.9648	7.31309	9.98285	9.02121	COL8	Zinc finger protein CONSTANS-LIKE 8 [Source:UniProtKB/Swiss-Prot;Acc:Q9M9B3]
AT1G49570	3.49302	1.24691e-34	4.34009e-33	64.2881	85.4783	87.081	6.69926	6.0054	8.77189	PER10	Peroxidase 10 [Source:UniProtKB/Swiss-Prot;Acc:Q9FX85]	peroxidase activity|extracellular region|response to oxidative stress|heme binding|hydrogen peroxide catabolic process|metal ion binding|oxidation-reduction process
AT1G49700	1.3119	0.000434586	0.00160219	0.153086	0	0	0.0761043	0.152719	0.076602		Plant protein 1589 of unknown function [Source:TAIR;Acc:AT1G49700]	molecular_function|mitochondrion|biological_process
AT1G49750	1.53845	5.88729e-64	4.72294e-62	100.529	95.7627	101.479	38.1852	33.4346	36.2716		Leucine-rich repeat (LRR) family protein [Source:TAIR;Acc:AT1G49750]	plasma membrane|chloroplast
AT1G49860	4.19018	8.09224e-13	8.91211e-12	10.8604	7.16548	6.7686	0.578259	0.291814	0.531191	GSTF14	Glutathione S-transferase F14 [Source:UniProtKB/Swiss-Prot;Acc:Q9C6C8]	glutathione transferase activity|cytoplasm|cytosol|glutathione metabolic process|response to toxic substance|toxin catabolic process
AT1G50090	Inf	3.88868e-09	3.02231e-08	0.687346	2.02485	1.81057	0	0	0	BCAT7	Putative branched-chain-amino-acid aminotransferase 7 [Source:UniProtKB/Swiss-Prot;Acc:Q9LPM8]	catalytic activity|branched-chain-amino-acid transaminase activity|cytoplasm|branched-chain amino acid metabolic process
AT1G50180	1.37004	1.21932e-10	1.09309e-09	1.58202	1.82915	1.47116	0.875711	0.721792	0.422241		Putative disease resistance protein At1g50180 [Source:UniProtKB/Swiss-Prot;Acc:Q9SX38]	ATP binding|defense response|ADP binding|plasmodesma
AT1G50480	1.38569	1.57379e-60	1.17035e-58	161.347	156.595	164.338	61.9615	67.6638	66.5079	THFS	Formate--tetrahydrofolate ligase [Source:UniProtKB/Swiss-Prot;Acc:Q9SPK5]	formate-tetrahydrofolate ligase activity|ATP binding|cytoplasm|folic acid-containing compound biosynthetic process|tetrahydrofolate interconversion|response to cadmium ion|copper ion binding|plasma membrane|chloroplast|apoplast|cytosol|response to cytokinin
AT1G50580	1.13844	0.000111364	0.000458955	2.18118	2.43654	3.22421	1.49053	1.03813	1.04444	UGT79B5	UDP-glycosyltransferase 79B5 [Source:UniProtKB/Swiss-Prot;Acc:Q9LPS8]	chloroplast|transferase activity, transferring glycosyl groups
AT1G50740	1.04886	3.65372e-15	4.84371e-14	35.0332	34.8428	35.6278	16.283	16	20.5533	FAX5	Protein FATTY ACID EXPORT 5 [Source:UniProtKB/Swiss-Prot;Acc:Q9C6T7]	molecular_function|mitochondrion|biological_process|integral component of membrane
AT1G51270	2.12381	1.58939e-17	2.47056e-16	2.03622	2.50111	2.75586	0.642012	0.594916	0.517206	PVA14	Vesicle-associated protein 1-4 [Source:UniProtKB/Swiss-Prot;Acc:Q9SYC9]	structural molecule activity|cytoplasm|signal transduction
AT1G51420	1.12277	2.39481e-05	0.000111506	7.60583	10.6171	10.2395	6.51751	3.42286	3.77003	SPP1	Probable sucrose-phosphatase 1 [Source:UniProtKB/Swiss-Prot;Acc:Q9C8J4]	magnesium ion binding|extracellular region|sucrose biosynthetic process|integral component of membrane|hydrolase activity|phosphoric ester hydrolase activity|sucrose-phosphate phosphatase activity|vacuolar membrane|response to abscisic acid|sphingosine-1-phosphate phosphatase activity|endoplasmic reticulum membrane|sphingolipid metabolic process|stomatal closure
AT1G51620	2.97637	2.56476e-36	9.32911e-35	7.05961	8.55909	8.60269	1.04343	0.845646	1.33066		Protein kinase superfamily protein [Source:TAIR;Acc:AT1G51620]	protein kinase activity|ATP binding|nucleus|plasma membrane|protein phosphorylation|kinase activity|phosphorylation
AT1G51760	2.52873	9.92106e-159	3.18357e-156	108.477	110.05	119.214	21.4662	20.1767	21.6098	ILL4	IAA-amino acid hydrolase ILR1-like 4 [Source:UniProtKB/Swiss-Prot;Acc:O04373]
AT1G51790	2.98544	1.23984e-42	5.5426e-41	8.63725	9.79582	11.7213	1.42952	1.03826	1.29848		Leucine-rich repeat protein kinase family protein [Source:TAIR;Acc:AT1G51790]	protein kinase activity|ATP binding|plasma membrane|protein phosphorylation|integral component of membrane|kinase activity|phosphorylation
AT1G51800	2.75449	7.71225e-41	3.2669e-39	39.4631	44.1989	51.1502	8.30262	6.29107	6.99149		Leucine-rich repeat protein kinase family protein [Source:TAIR;Acc:AT1G51800]
AT1G51810	Inf	0.0133941	0.0346578	0.0686123	0.0171024	0.0534213	0	0	0		Leucine-rich repeat protein kinase family protein [Source:TAIR;Acc:AT1G51810]	plasma membrane|kinase activity|phosphorylation
AT1G51820	3.21545	7.07659e-25	1.66602e-23	1.93725	2.70262	2.88703	0.414121	0.151722	0.237254		Probable LRR receptor-like serine/threonine-protein kinase At1g51820 [Source:UniProtKB/Swiss-Prot;Acc:C0LGG3]	protein serine/threonine kinase activity|ATP binding|plasma membrane|protein phosphorylation|integral component of membrane|kinase activity|phosphorylation
AT1G51850	1.23971	2.03297e-09	1.627e-08	6.5681	9.38306	9.37989	4.56937	3.48216	3.5798		Leucine-rich repeat protein kinase family protein [Source:TAIR;Acc:AT1G51850]	protein serine/threonine kinase activity|ATP binding|protein phosphorylation|integral component of membrane|kinase activity|plasma membrane|plasmodesma
AT1G51890	3.8672	2.63763e-118	5.37274e-116	7.16865	7.49502	7.73834	0.425839	0.497873	0.702388		Probable LRR receptor-like protein kinase At1g51890 [Source:UniProtKB/Swiss-Prot;Acc:C0LGG6]	protein serine/threonine kinase activity|ATP binding|extracellular region|plasma membrane|protein phosphorylation|integral component of membrane|kinase activity|defense response to bacterium
AT1G51913	3.66289	0.000102203	0.000423884	2.96602	4.6076	4.64452	0	0	1.15837		LOCATED IN: endomembrane system; BEST Arabidopsis thaliana protein match is: cryptdin protein-related (TAIR:AT1G51915.1); Has 22 Blast hits to 22 proteins in 3 species: Archae - 0; Bacteria - 0; Metazoa - 0; Fungi - 0; Plants - 22; Viruses - 0; Othe /.../ryotes - 0 (source: NCBI BLink). [Source:TAIR;Acc:AT1G51913]	extracellular region
AT1G51920	4.06817	4.05616e-05	0.000181154	0	3.10291	4.53992	0	0	0		unknown protein; FUNCTIONS IN: molecular_function unknown; INVOLVED IN: biological_process unknown; LOCATED IN: endomembrane system; EXPRESSED IN: stem, stamen; EXPRESSED DURING: 4 anthesis; Has 22 Blast hits to 22 proteins in 5 species: Archae - 0; /.../ria - 0; Metazoa - 0; Fungi - 0; Plants - 22; Viruses - 0; Other Eukaryotes - 0 (source: NCBI BLink). [Source:TAIR;Acc:AT1G51920]	molecular_function|extracellular region|biological_process
AT1G51960	2.9089	0.0116565	0.0306836	0.298788	0.101101	0.208158	0	0.099889	0	IQD27	IQ-domain 27 [Source:TAIR;Acc:AT1G51960]	calmodulin binding|nucleus|biological_process
AT1G52000	6.51041	0	0	76.2231	76.6021	74.4303	1.00895	0.921479	0.76249	JAL5	Jacalin-related lectin 5 [Source:UniProtKB/Swiss-Prot;Acc:Q9ZU23]	cellular_component|carbohydrate binding
AT1G52030	7.67377	9.53762e-56	6.31127e-54	12.2357	8.64481	8.99897	0.0186133	0.057135	0.0573299	F-ATMBP	Myrosinase-binding protein 2 [Source:UniProtKB/Swiss-Prot;Acc:Q9SAV1]
AT1G52040	6.03137	1.08262e-28	3.01193e-27	45.6217	29.921	31.1531	0.715067	0.484539	0.538966	MBP1	Myrosinase-binding protein 1 [Source:UniProtKB/Swiss-Prot;Acc:Q9SAV0]	extracellular region|carbohydrate binding|defense response|nucleus|vacuole
AT1G52110	4.33484	1.66621e-05	7.97203e-05	0.146592	0.193075	0.126018	0	0	0.0243569		Mannose-binding lectin superfamily protein [Source:TAIR;Acc:AT1G52110]	mitochondrion|carbohydrate binding
AT1G52120	5.62557	4.12556e-70	3.85025e-68	4.10237	4.73887	4.68371	0.131243	0.0538847	0.0813631	JAL12	Jacalin-related lectin 12 [Source:UniProtKB/Swiss-Prot;Acc:Q0WMR0]	nucleus|carbohydrate binding
AT1G52130	5.10839	3.52579e-13	4.01711e-12	1.10754	1.95507	2.18282	0.0330543	0	0.100443	JAL13	Jacalin-related lectin 13 [Source:UniProtKB/Swiss-Prot;Acc:Q9ZU13]	cytoplasm|carbohydrate binding
AT1G52200	2.72036	2.83574e-45	1.37531e-43	95.4482	103.955	121.71	18.7517	13.9858	19.4274	PCR8	Protein PLANT CADMIUM RESISTANCE 8 [Source:UniProtKB/Swiss-Prot;Acc:Q9M815]	molecular_function|plasma membrane|integral component of membrane|response to oxidative stress
AT1G52270	1.42915	0.000603669	0.00215826	3.40281	3.54051	1.99668	1.41358	1.17988	0.916022		unknown protein; BEST Arabidopsis thaliana protein match is: unknown protein (TAIR:AT4G28310.1); Has 29 Blast hits to 28 proteins in 9 species: Archae - 0; Bacteria - 0; Metazoa - 0; Fungi - 0; Plants - 29; Viruses - 0; Other Eukaryotes - 0 (source: /.../BLink). [Source:TAIR;Acc:AT1G52270]	molecular_function|nucleus|biological_process
AT1G52400	5.33438	2.3819e-87	3.1171e-85	340.328	269.816	281.255	9.8054	7.43328	6.50722	BGLU18	Beta-D-glucopyranosyl abscisate beta-glucosidase [Source:UniProtKB/Swiss-Prot;Acc:Q9SE50]	hydrolase activity, hydrolyzing O-glycosyl compounds|extracellular region|endoplasmic reticulum lumen|carbohydrate metabolic process|abscisic acid-activated signaling pathway|glucosinolate catabolic process|nucleus|vacuole|endoplasmic reticulum|beta-glucosidase activity|response to water deprivation|response to abiotic stimulus|response to salt stress|abscisic acid metabolic process|response to a…
AT1G52410	3.77957	2.27664e-187	8.8884e-185	66.5335	58.0473	62.1407	4.98635	4.81423	4.41722	TSA1	TSK-associating protein 1 [Source:UniProtKB/Swiss-Prot;Acc:F4ICX9]	tryptophan biosynthetic process|nucleus|nuclear envelope|endoplasmic reticulum lumen|chloroplast|auxin biosynthetic process|pyridoxal phosphate binding|indole-3-glycerol-phosphate lyase activity|chloroplast thylakoid membrane|vacuole|calcium ion binding|protein binding|chloroplast stroma|peroxisome|defense response to bacterium|defense response by callose deposition in cell wall|defense response …
AT1G52770	3.18718	1.92487e-05	9.10729e-05	0.532144	0.324714	0.611333	0.0884995	0.0294525	0.0595022		Phototropic-responsive NPH3 family protein [Source:TAIR;Acc:AT1G52770]	signal transducer activity|plasma membrane|response to light stimulus
AT1G52890	2.98596	3.33414e-45	1.61035e-43	7.97761	8.36139	9.18141	0.95266	0.887159	1.65228	NAC019	NAC domain-containing protein 19 [Source:UniProtKB/Swiss-Prot;Acc:Q9C932]	DNA binding|nucleus|transcription, DNA-templated|regulation of transcription, DNA-templated|multicellular organism development|transcription factor activity, sequence-specific DNA binding|protein binding|response to water deprivation
AT1G52900	Inf	0.0293743	0.0685693	0.239117	0.345731	0.361233	0	0	0		Toll-Interleukin-Resistance (TIR) domain family protein [Source:TAIR;Acc:AT1G52900]	cytoplasm|defense response|signal transduction
AT1G53080	1.51518	5.12137e-07	3.08401e-06	2.98665	3.95435	3.46114	1.25968	0.93053	2.33757		Lectin-like protein At1g53080 [Source:UniProtKB/Swiss-Prot;Acc:Q9LNN3]	plasma membrane|biological_process|carbohydrate binding|apoplast|plant-type cell wall
AT1G53160	1.38091	0.00138017	0.00456258	0.669783	1.05747	1.10349	0.42349	0.428048	0.478737	SPL4	Squamosa promoter-binding-like protein 4 [Source:UniProtKB/Swiss-Prot;Acc:Q9S7A9]	DNA binding|nucleus|cytoplasm|transcription, DNA-templated|flower development|metal ion binding|transcription factor activity, sequence-specific DNA binding|regulation of transcription, DNA-templated|regulation of vegetative phase change
AT1G53430	1.07331	1.24708e-31	3.86413e-30	25.3509	25.3406	28.0976	12.7743	12.539	14.1583		Leucine-rich repeat transmembrane protein kinase [Source:TAIR;Acc:AT1G53430]	protein kinase activity|ATP binding|plasma membrane|protein phosphorylation|integral component of membrane|kinase activity
AT1G53440	2.25307	3.47512e-73	3.50882e-71	42.0272	43.006	48.122	8.16296	9.23888	11.6565		Probable LRR receptor-like serine/threonine-protein kinase At1g53440 [Source:UniProtKB/Swiss-Prot;Acc:C0LGG9]	ATP binding|plasma membrane|protein phosphorylation|integral component of membrane|kinase activity
AT1G53625	2.05532	3.8225e-08	2.65389e-07	15.9024	20.0865	25.945	6.55526	3.0275	6.5872		unknown protein; Has 29996 Blast hits to 6987 proteins in 655 species: Archae - 23; Bacteria - 6686; Metazoa - 10521; Fungi - 1178; Plants - 7439; Viruses - 681; Other Eukaryotes - 3468 (source: NCBI BLink). [Source:TAIR;Acc:AT1G53625]	molecular_function|cellular_component|biological_process
AT1G53887	1.36256	0.00107919	0.00365425	6.66192	6.20495	6.8048	2.6186	2.88446	2.70584		unknown protein; FUNCTIONS IN: molecular_function unknown; INVOLVED IN: biological_process unknown; LOCATED IN: cellular_component unknown; Has 30201 Blast hits to 17322 proteins in 780 species: Archae - 12; Bacteria - 1396; Metazoa - 17338; Fungi - /.../ Plants - 5037; Viruses - 0; Other Eukaryotes - 2996 (source: NCBI BLink). [Source:TAIR;Acc:AT1G53887]	molecular_function|cellular_component|biological_process
AT1G53950	2.17394	7.16012e-05	0.000305607	0.774588	0.786294	0.721463	0.349964	0.256825	0		Ubiquitin-like superfamily protein [Source:TAIR;Acc:AT1G53950]	molecular_function|nucleus|cellular protein modification process
AT1G53980	3.91765	8.0764e-10	6.76402e-09	2.1533	3.62354	1.79572	0	0.564678	0		Ubiquitin-like superfamily protein [Source:TAIR;Acc:AT1G53980]	molecular_function|cellular_component|biological_process
AT1G53990	1.67404	9.49815e-10	7.89267e-09	2.64707	1.52164	2.3929	0.483621	0.991159	1.05913	GLIP3	GDSL esterase/lipase 3 [Source:UniProtKB/Swiss-Prot;Acc:Q9SYF5]	extracellular region|lipid catabolic process|lipase activity|carboxylic ester hydrolase activity
AT1G54000	1.50077	8.45461e-24	1.87903e-22	186.333	223.749	220.229	93.9976	82.0974	61.5	GLL22	GDSL esterase/lipase 22 [Source:UniProtKB/Swiss-Prot;Acc:Q1H583]	extracellular region|lipid catabolic process|lipase activity|hydrolase activity, acting on ester bonds|carboxylic ester hydrolase activity|vacuole|plant-type vacuole|vacuolar membrane|plant-type cell wall|plasmodesma
AT1G54010	1.87807	6.04338e-111	1.12354e-108	590.051	575.534	602.018	170.2	165.837	172.375	GLL23	Inactive GDSL esterase/lipase-like protein 23 [Source:UniProtKB/Swiss-Prot;Acc:Q8W4H8]	extracellular region|endoplasmic reticulum|hydrolase activity, acting on ester bonds|carboxylic ester hydrolase activity|vacuole|vacuolar membrane|membrane|plasmodesma
AT1G54020	6.20668	5.27562e-47	2.69241e-45	14.618	9.46773	10.595	0.275418	0.0801108	0.121448		GDSL esterase/lipase At1g54020 [Source:UniProtKB/Swiss-Prot;Acc:Q9C5N8]	extracellular region|lipid catabolic process|hydrolase activity, acting on ester bonds|carboxylic ester hydrolase activity|vacuole
AT1G54030	1.2471	9.66371e-46	4.77579e-44	135.919	147.527	150.235	63.8885	64.6434	65.3785	MVP1	Inactive GDSL esterase/lipase-like protein 25 [Source:UniProtKB/Swiss-Prot;Acc:Q7XA74]	extracellular region|lipase activity|hydrolase activity, acting on ester bonds|carboxylic ester hydrolase activity|vacuole|endoplasmic reticulum|intracellular protein transport|plant-type vacuole membrane|ER body|endoplasmic reticulum organization|protein exit from endoplasmic reticulum|plasmodesma|intracellular|cell
AT1G54040	2.52932	0.000133479	0.00054246	0.704044	0.642115	0.299056	0.160075	0.128005	0.0321929	ESP	Epithiospecifier protein [Source:UniProtKB/Swiss-Prot;Acc:Q8RY71]	molecular_function|cysteine-type endopeptidase activity|cellular_component|nucleus|cytoplasm|centrosome|proteolysis|mitotic nuclear division|peptidase activity|mitotic spindle|positive regulation of mitotic sister chromatid separation|circadian rhythm|response to jasmonic acid|glucosinolate catabolic process|enzyme regulator activity|unidimensional cell growth|embryo development ending in seed do…
AT1G55010	1.13682	0.0185852	0.0460598	8.33448	1.82398	5.29747	0	1.76321	1.89827	PDF1.5	Defensin-like protein 18 [Source:UniProtKB/Swiss-Prot;Acc:Q9FZ31]	molecular_function|extracellular region|defense response|killing of cells of other organism|defense response to fungus
AT1G55120	1.14024	5.78631e-09	4.41369e-08	4.83524	6.25352	6.02145	2.27099	2.78591	2.82559	CWINV3	Beta-fructofuranosidase, insoluble isoenzyme CWINV3 [Source:UniProtKB/Swiss-Prot;Acc:Q67XZ3]
AT1G55450	1.58332	5.80286e-26	1.42337e-24	82.6358	83.9159	95.2188	26.446	24.4166	37.745		S-adenosyl-L-methionine-dependent methyltransferases superfamily protein [Source:TAIR;Acc:AT1G55450]	cytoplasm|response to salt stress
AT1G55650	Inf	0.0438456	0.096485	0.322266	0.0532352	0.110807	0	0	0	HMGB11	Putative high mobility group B protein 11 [Source:UniProtKB/Swiss-Prot;Acc:Q9LG02]	DNA binding|nucleus|transcription, DNA-templated|regulation of transcription, DNA-templated|transcription factor activity, sequence-specific DNA binding|chloroplast
AT1G55850	1.05134	1.81057e-29	5.19763e-28	38.539	38.8063	42.4719	22.0466	19.3512	19.1724	CSLE1	Cellulose synthase-like protein E1 [Source:UniProtKB/Swiss-Prot;Acc:Q8VZK9]	Golgi membrane|polysaccharide biosynthetic process|endoplasmic reticulum membrane|Golgi apparatus|plant-type cell wall biogenesis|integral component of membrane|transferase activity, transferring glycosyl groups|cellulose synthase activity|cellulose synthase (UDP-forming) activity|cellulose biosynthetic process|cell wall organization|endoplasmic reticulum|plasma membrane
AT1G55910	1.0422	8.44072e-16	1.16035e-14	25.4325	25.2417	23.4982	15.3379	11.4041	11.3955	ZIP11	Zinc transporter 11 [Source:UniProtKB/Swiss-Prot;Acc:Q94EG9]	zinc ion transmembrane transporter activity|plasma membrane|cation transport|cation transmembrane transporter activity|membrane|integral component of membrane|metal ion transmembrane transporter activity|zinc II ion transmembrane transport
AT1G56060	4.18627	5.41878e-45	2.59051e-43	7.19767	10.6429	10.6559	0	0.58646	0.590108		unknown protein; BEST Arabidopsis thaliana protein match is: unknown protein (TAIR:AT2G32210.1); Has 180 Blast hits to 180 proteins in 22 species: Archae - 0; Bacteria - 0; Metazoa - 0; Fungi - 10; Plants - 170; Viruses - 0; Other Eukaryotes - 0 (so /.../NCBI BLink). [Source:TAIR;Acc:AT1G56060]	molecular_function|cellular_component|biological_process
AT1G56120	2.31555	1.28582e-31	3.97891e-30	1.91394	2.36907	2.37679	0.439555	0.357785	0.545157		Leucine-rich repeat transmembrane protein kinase [Source:TAIR;Acc:AT1G56120]	ATP binding|plasma membrane|protein phosphorylation|integral component of membrane|kinase activity|phosphorylation
AT1G56240	4.35735	2.08102e-19	3.61362e-18	11.961	13.014	18.5151	0.690478	0.61614	1.02809	PP2B13	F-box protein PP2-B13 [Source:UniProtKB/Swiss-Prot;Acc:Q9C7J9]
AT1G56250	4.26359	8.0228e-54	4.99825e-52	7.13663	6.56977	7.79052	0.612416	0.404037	0.273862	VBF	F-box protein VBF [Source:UniProtKB/Swiss-Prot;Acc:Q9C7K0]
AT1G56650	1.71612	0.0143184	0.036713	0.831536	0.778993	0.684706	0.352198	0.117857	0.177935	MYB75	Transcription factor MYB75 [Source:UniProtKB/Swiss-Prot;Acc:Q9FE25]
AT1G56680	1.22831	3.26425e-05	0.000148245	3.43344	4.39241	4.89745	2.93363	1.34921	1.44633		Chitinase family protein [Source:TAIR;Acc:AT1G56680]	chitinase activity|extracellular region|carbohydrate metabolic process|chitin catabolic process|chitin binding|cell wall macromolecule catabolic process
AT1G57630	8.05021	8.62234e-209	4.59042e-206	60.6237	54.7966	64.1045	0.311509	0.149718	0.459256		Toll-Interleukin-Resistance (TIR) domain family protein [Source:TAIR;Acc:AT1G57630]	defense response|signal transduction|chloroplast|cellular response to hypoxia
AT1G57650	Inf	6.5303e-09	4.94896e-08	0.283044	0.555801	0.435623	0	0	0		ATP binding [Source:TAIR;Acc:AT1G57650]	nucleus|defense response
AT1G58225	4.75242	4.88262e-07	2.9501e-06	1.25687	1.56047	1.85142	0.206699	0	0		unknown protein; FUNCTIONS IN: molecular_function unknown; INVOLVED IN: biological_process unknown; LOCATED IN: endomembrane system; Has 4 Blast hits to 4 proteins in 2 species: Archae - 0; Bacteria - 0; Metazoa - 0; Fungi - 0; Plants - 4; Viruses - /.../her Eukaryotes - 0 (source: NCBI BLink). [Source:TAIR;Acc:AT1G58225]	molecular_function|mitochondrion|biological_process
AT1G58300	3.7914	1.09689e-16	1.60291e-15	1.52148	2.0894	2.10833	0.0560484	0.168882	0.113839	HO4	Heme oxygenase 4, chloroplastic [Source:UniProtKB/Swiss-Prot;Acc:Q9LQC0]	heme oxidation|chloroplast|photosynthesis|oxidoreductase activity|metal ion binding|heme oxygenase (decyclizing) activity|heme binding
AT1G58390	2.5032	0.0383373	0.0860779	0.0983548	0.0162262	0.169761	0	0.0654148	0		Probable disease resistance protein At1g58390 [Source:UniProtKB/Swiss-Prot;Acc:Q8W474]	ATP binding|cellular_component|defense response|ADP binding
AT1G58420	2.20493	1.71434e-07	1.10355e-06	3.51563	3.44169	3.398	0.519435	0.350578	1.40969		Uncharacterised conserved protein UCP031279 [Source:TAIR;Acc:AT1G58420]	molecular_function|mitochondrion|biological_process
AT1G58602	1.575	4.20742e-70	3.91107e-68	28.0991	28.6395	30.8759	10.6468	11.1004	9.71763		Probable disease resistance protein At1g58602 [Source:UniProtKB/Swiss-Prot;Acc:Q8W3K0]	ATP binding|defense response|ADP binding
AT1G59730	1.54119	0.0113369	0.0299466	2.12171	4.35668	2.14645	1.02478	0.685491	1.02518	TRX7	Thioredoxin H7 [Source:UniProtKB/Swiss-Prot;Acc:Q9XIF4]
AT1G59740	1.14899	3.40313e-19	5.83163e-18	12.4641	13.4223	14.3104	5.83355	6.30366	6.68065	NPF4.3	Protein NRT1/ PTR FAMILY 4.3 [Source:UniProtKB/Swiss-Prot;Acc:Q93VV5]	transporter activity|plasma membrane|oligopeptide transport|membrane|integral component of membrane|response to nematode
AT1G59865	4.08797	0.036924	0.083312	0.322994	0	0.656661	0	0	0		unknown protein; Has 35333 Blast hits to 34131 proteins in 2444 species: Archae - 798; Bacteria - 22429; Metazoa - 974; Fungi - 991; Plants - 531; Viruses - 0; Other Eukaryotes - 9610 (source: NCBI BLink). [Source:TAIR;Acc:AT1G59865]	molecular_function|mitochondrion|biological_process|integral component of membrane
AT1G59870	2.15613	3.05911e-55	2.00167e-53	326.454	339.872	392.193	78.1779	78.7201	95.3769	ABCG36	ABC transporter G family member 36 [Source:UniProtKB/Swiss-Prot;Acc:Q9XIE2]
AT1G59950	7.04662	2.97316e-37	1.11792e-35	1.87364	1.97682	2.10798	0	0	0		NAD(P)-linked oxidoreductase superfamily protein [Source:TAIR;Acc:AT1G59950]	chloroplast|oxidoreductase activity|oxidation-reduction process
AT1G59960	2.36389	1.7439e-102	2.98181e-100	52.8379	60.5975	60.1659	12.2486	12.812	11.5567		NAD(P)-linked oxidoreductase superfamily protein [Source:TAIR;Acc:AT1G59960]	chloroplast|oxidoreductase activity|oxidation-reduction process|response to salt stress|cytosol
AT1G60095	1.62421	9.48452e-15	1.22007e-13	2.86024	3.26479	3.5872	1.27339	1.14689	1.02612	JAL16	Jacalin-related lectin 16 [Source:UniProtKB/Swiss-Prot;Acc:O80735]	cellular_component|carbohydrate binding
AT1G60110	2.87819	5.1392e-30	1.50482e-28	2.49335	3.07929	2.83357	0.359772	0.414516	0.538398	JAL17	Jacalin-related lectin 17 [Source:UniProtKB/Swiss-Prot;Acc:O80736]	nucleus|carbohydrate binding
AT1G60130	2.74155	2.39352e-08	1.70784e-07	0.637712	1.18555	0.983419	0.216151	0.220367	0.0985392	JAL18	Jacalin-related lectin 18 [Source:UniProtKB/Swiss-Prot;Acc:O80737]	cellular_component|carbohydrate binding
AT1G60730	2.57473	3.43837e-130	8.38997e-128	36.8063	40.0793	39.785	8.12558	5.29996	6.41133		Probable aldo-keto reductase 5 [Source:UniProtKB/Swiss-Prot;Acc:Q9ASZ9]	aldo-keto reductase (NADP) activity|cytoplasm|oxidoreductase activity|oxidation-reduction process|cytosol
AT1G60740	1.59782	3.35999e-05	0.000152328	4.15741	3.58003	3.07045	1.26375	1.37099	1.56899	PRXIID	Peroxiredoxin-2D [Source:UniProtKB/Swiss-Prot;Acc:O22711]	peroxidase activity|cytoplasm|antioxidant activity|peroxiredoxin activity|oxidation-reduction process|plasma membrane
AT1G61120	Inf	4.07559e-110	7.45864e-108	12.0127	9.4482	12.2403	0	0	0	GES	(E,E)-geranyllinalool synthase [Source:UniProtKB/Swiss-Prot;Acc:Q93YV0]
AT1G61340	1.58025	8.94832e-06	4.48853e-05	8.17016	8.74102	12.5036	3.02439	2.51841	4.96391		F-box protein At1g61340 [Source:UniProtKB/Swiss-Prot;Acc:Q8GX77]
AT1G61360	2.0064	2.97379e-47	1.52765e-45	21.8322	24.4945	26.214	6.48687	5.66526	6.94729		G-type lectin S-receptor-like serine/threonine-protein kinase At1g61360 [Source:UniProtKB/Swiss-Prot;Acc:O64784]	ATP binding|plasma membrane|integral component of membrane|kinase activity|carbohydrate binding|recognition of pollen
AT1G61370	2.03312	1.07407e-20	2.01281e-19	7.86326	8.42006	11.0073	1.95501	2.25471	2.71018		G-type lectin S-receptor-like serine/threonine-protein kinase At1g61370 [Source:UniProtKB/Swiss-Prot;Acc:O64783]	ATP binding|plasma membrane|integral component of membrane|kinase activity|carbohydrate binding|recognition of pollen
AT1G61380	1.78068	7.09279e-48	3.684e-46	21.3226	20.9629	24.7543	6.02913	7.23828	7.37009	SD129	G-type lectin S-receptor-like serine/threonine-protein kinase SD1-29 [Source:UniProtKB/Swiss-Prot;Acc:O64782]
AT1G61390	1.1394	0.0153833	0.0390755	0.273565	0.257533	0.368104	0.143076	0.128034	0.128493		G-type lectin S-receptor-like serine/threonine-protein kinase At1g61390 [Source:UniProtKB/Swiss-Prot;Acc:O64781]	ATP binding|plasma membrane|integral component of membrane|kinase activity|carbohydrate binding|recognition of pollen
AT1G61420	1.72247	2.94184e-17	4.47775e-16	2.1337	2.51574	2.30887	0.965102	0.78615	0.560095		G-type lectin S-receptor-like serine/threonine-protein kinase At1g61420 [Source:UniProtKB/Swiss-Prot;Acc:O64778]	ATP binding|plasma membrane|integral component of membrane|kinase activity|carbohydrate binding|recognition of pollen
AT1G61430	1.13655	6.96362e-13	7.73094e-12	2.56203	3.19784	3.35026	1.62215	1.33023	1.49393		G-type lectin S-receptor-like serine/threonine-protein kinase At1g61430 [Source:UniProtKB/Swiss-Prot;Acc:O64777]	ATP binding|plasma membrane|integral component of membrane|kinase activity|carbohydrate binding|recognition of pollen
AT1G61550	1.63491	0.00917434	0.0248622	0.228057	0.177299	0.218537	0.0480408	0.09736	0.0974549		G-type lectin S-receptor-like serine/threonine-protein kinase At1g61550 [Source:UniProtKB/Swiss-Prot;Acc:Q9SY95]	ATP binding|plasma membrane|integral component of membrane|kinase activity|carbohydrate binding|recognition of pollen
AT1G61610	4.03752	7.27522e-19	1.21904e-17	1.02881	0.92245	1.39362	0.0627889	0.0641218	0.0805472		Putative G-type lectin S-receptor-like serine/threonine-protein kinase At1g61610 [Source:UniProtKB/Swiss-Prot;Acc:Q9SY89]	ATP binding|plasma membrane|integral component of membrane|kinase activity|carbohydrate binding|recognition of pollen
AT1G61640	1.12065	2.12499e-14	2.65482e-13	5.70219	6.31708	6.80549	3.5369	2.6446	2.67248		Protein kinase superfamily protein [Source:TAIR;Acc:AT1G61640]	plasma membrane|integral component of membrane|kinase activity|phosphorylation
AT1G61800	4.36218	1.10896e-34	3.87145e-33	17.2423	19.4953	24.9561	0.818197	1.60489	0.791552	GPT2	Glucose-6-phosphate/phosphate translocator 2, chloroplastic [Source:UniProtKB/Swiss-Prot;Acc:Q94B38]	chloroplast|glucose-6-phosphate transmembrane transporter activity|antiporter activity|hexose phosphate transport|integral component of membrane|chloroplast membrane|inorganic phosphate transmembrane transporter activity|gamete generation|phosphoglycerate transmembrane transporter activity|phosphoglycerate transport|phosphoenolpyruvate transport|glucose-6-phosphate transport|triose phosphate tran…
AT1G62290	1.63805	1.21748e-12	1.32035e-11	19.426	25.7938	28.4885	7.17087	9.23145	9.31016	APA2	Aspartic proteinase A2 [Source:UniProtKB/Swiss-Prot;Acc:Q8VYL3]
AT1G62410	1.96382	0.0334549	0.0765612	0.20017	0.198315	0.51683	0.0975425	0	0		MIF4G domain-containing protein [Source:TAIR;Acc:AT1G62410]	RNA binding|translation initiation factor activity|cytoplasm|translation
AT1G62420	2.23054	1.25068e-33	4.2215e-32	9.66943	11.8787	13.0637	3.17321	2.28164	2.6372		Protein of unknown function (DUF506) [Source:TAIR;Acc:AT1G62420]	molecular_function|cellular_component|biological_process
AT1G62560	1.94324	8.0914e-06	4.08758e-05	7.11029	4.79073	3.8919	1.81339	0.939257	1.44415	FMOGS-OX3	Flavin-containing monooxygenase FMO GS-OX3 [Source:UniProtKB/Swiss-Prot;Acc:Q9SXE1]
AT1G62580	1.79525	0.00041823	0.00154674	0.431771	0.264718	0.478372	0.163864	0.264607	0.0333495		Flavin-binding monooxygenase family protein [Source:TAIR;Acc:AT1G62580]
AT1G62810	1.19474	1.74457e-30	5.18612e-29	15.9886	18.2267	18.5404	8.53038	8.2818	7.88046		Primary amine oxidase [Source:UniProtKB/Swiss-Prot;Acc:Q8H1H9]
AT1G63140	3.81644	0.00140467	0.00463574	0.26539	0.149695	0.312157	0.0740788	0	0		O-methyltransferase family protein [Source:TAIR;Acc:AT1G63140]	cytoplasm|methylation|protein dimerization activity|cytosol
AT1G63350	2.37979	1.97556e-49	1.07622e-47	4.99917	5.1802	5.91523	1.01301	0.735612	1.38895		Putative disease resistance protein At1g63350 [Source:UniProtKB/Swiss-Prot;Acc:Q9C8T9]	ATP binding|cellular_component|defense response|ADP binding
AT1G63750	1.18695	2.703e-19	4.65914e-18	4.7931	4.96885	5.49032	1.96376	2.48772	2.68571		Disease resistance protein (TIR-NBS-LRR class) family [Source:TAIR;Acc:AT1G63750]	ATP binding|nucleus|defense response|signal transduction|integral component of membrane|ADP binding
AT1G63860	1.7886	6.57641e-47	3.32727e-45	5.95702	5.889	6.29411	1.52955	1.65463	2.22433		Disease resistance protein (TIR-NBS-LRR class) family [Source:TAIR;Acc:AT1G63860]	ATP binding|signal transduction|chloroplast|ADP binding
AT1G64160	Inf	1.19852e-16	1.74924e-15	18.5833	28.2059	45.3216	0	0	0	DIR5	Dirigent protein 5 [Source:UniProtKB/Swiss-Prot;Acc:Q9SH66]	extracellular region|defense response|lignan biosynthetic process|apoplast|guiding stereospecific synthesis activity|(-)-pinoresinol biosynthetic process
AT1G64170	1.19509	1.4731e-07	9.55139e-07	5.29071	6.00686	7.19473	3.60171	2.55341	2.60613	CHX16	Cation/H(+) antiporter 16 [Source:UniProtKB/Swiss-Prot;Acc:Q1HDT3]	monovalent cation:proton antiporter activity|potassium ion transport|sodium:proton antiporter activity|integral component of membrane|cation transport|endoplasmic reticulum|regulation of pH
AT1G64280	1.11525	1.01262e-28	2.82052e-27	24.2623	25.3209	26.7547	12.179	11.8044	13.6972	NPR1	Regulatory protein NPR1 [Source:UniProtKB/Swiss-Prot;Acc:P93002]	nucleus|cytoplasm|plant-type hypersensitive response|protein ubiquitination|protein binding|cell death|response to bacterium|systemic acquired resistance|systemic acquired resistance, salicylic acid mediated signaling pathway|response to wounding|regulation of jasmonic acid mediated signaling pathway|regulation of salicylic acid mediated signaling pathway|response to heat|response to insect|negat…
AT1G64405	1.26188	0.00665342	0.0186431	2.18373	2.38761	3.59595	1.39625	1.05888	1.16602		unknown protein; Has 13 Blast hits to 13 proteins in 7 species: Archae - 0; Bacteria - 0; Metazoa - 0; Fungi - 0; Plants - 13; Viruses - 0; Other Eukaryotes - 0 (source: NCBI BLink). [Source:TAIR;Acc:AT1G64405]	molecular_function|nucleus|floral organ abscission
AT1G64710	1.43663	2.72221e-25	6.48705e-24	56.2616	45.1093	50.867	19.2433	19.169	21.0405		GroES-like zinc-binding dehydrogenase family protein [Source:TAIR;Acc:AT1G64710]	cytoplasm|zinc ion binding|oxidoreductase activity|oxidation-reduction process
AT1G64910	1.34762	0.0349345	0.0794814	0.443245	0.272017	0.672774	0.202265	0.272105	0.068275	UGT79B10	UDP-glycosyltransferase 79B10 [Source:UniProtKB/Swiss-Prot;Acc:Q9XIQ5]	chloroplast|transferase activity, transferring glycosyl groups
AT1G65240	2.27473	6.71548e-12	6.74861e-11	1.79421	1.86265	2.11959	0.214247	0.433066	0.577184		Aspartic proteinase-like protein 2 [Source:UniProtKB/Swiss-Prot;Acc:Q9S9K4]	plasma membrane|proteolysis|anchored component of membrane|anchored component of plasma membrane
AT1G65250	1.10072	3.29816e-05	0.000149699	2.20207	2.77709	3.02258	1.47357	1.38096	0.983305		Probable inactive receptor-like protein kinase At1g65250 [Source:UniProtKB/Swiss-Prot;Acc:O80795]	ATP binding|nucleus|protein phosphorylation|kinase activity|phosphorylation
AT1G65390	1.95762	2.12803e-48	1.12526e-46	18.5607	17.4647	19.2765	4.66579	4.73803	5.07778	PP2A5	Protein PHLOEM PROTEIN 2-LIKE A5 [Source:UniProtKB/Swiss-Prot;Acc:Q9C5Q9]
AT1G65481	5.14757	1.4748e-18	2.43461e-17	3.81702	2.94989	3.20058	0.26035	0	0		unknown protein; FUNCTIONS IN: molecular_function unknown; INVOLVED IN: biological_process unknown; LOCATED IN: endomembrane system. [Source:TAIR;Acc:AT1G65481]	molecular_function|biological_process|chloroplast
AT1G65483	Inf	0.0437522	0.0963247	0	0	0	0	0	0		unknown protein; Has 5 Blast hits to 5 proteins in 2 species: Archae - 0; Bacteria - 0; Metazoa - 0; Fungi - 0; Plants - 5; Viruses - 0; Other Eukaryotes - 0 (source: NCBI BLink). [Source:TAIR;Acc:AT1G65483]	cytoplasm
AT1G65484	2.60645	0.00576956	0.0164659	0.90014	0.902037	0.467575	0.110645	0	0.227009		unknown protein; FUNCTIONS IN: molecular_function unknown; INVOLVED IN: biological_process unknown; LOCATED IN: endomembrane system; Has 30201 Blast hits to 17322 proteins in 780 species: Archae - 12; Bacteria - 1396; Metazoa - 17338; Fungi - 3422; /.../ - 5037; Viruses - 0; Other Eukaryotes - 2996 (source: NCBI BLink). [Source:TAIR;Acc:AT1G65484]	molecular_function|extracellular region|mitochondrion|biological_process
AT1G65486	1.96021	3.20576e-23	6.90211e-22	2.11421	4.52472	2.71793	1.1208	1.12317	1.52289		unknown protein; FUNCTIONS IN: molecular_function unknown; INVOLVED IN: biological_process unknown; LOCATED IN: endomembrane system; BEST Arabidopsis thaliana protein match is: unknown protein (TAIR:AT1G65490.1); Has 30201 Blast hits to 17322 protei /.../780 species: Archae - 12; Bacteria - 1396; Metazoa - 17338; Fungi - 3422; Plants - 5037; Viruses - 0; Other Eukaryotes - 2996 (source: NCBI BLin…	molecular_function|extracellular region|nucleus|biological_process
AT1G65500	5.73148	7.63265e-63	5.97976e-61	23.9993	28.9057	32.0354	0.645154	0.638487	0.643718		unknown protein; FUNCTIONS IN: molecular_function unknown; INVOLVED IN: biological_process unknown; LOCATED IN: endomembrane system; EXPRESSED IN: 14 plant structures; EXPRESSED DURING: 9 growth stages; BEST Arabidopsis thaliana protein match is: un /.../protein (TAIR:AT1G65486.1); Has 23 Blast hits to 23 proteins in 2 species: Archae - 0; Bacteria - 0; Metazoa - 0; Fungi - 0; Plants - 23; Viruse…	molecular_function|mitochondrion|biological_process
AT1G65620	1.35792	0.000144345	0.000583685	1.38712	1.04084	0.939741	0.522283	0.466014	0.202488	LBD6	LOB domain-containing protein 6 [Source:UniProtKB/Swiss-Prot;Acc:O04479]
AT1G65790	5.4785	1.62042e-12	1.73326e-11	0.365113	0.374762	0.532869	0	0.0345362	0	SD17	Receptor-like serine/threonine-protein kinase SD1-7 [Source:UniProtKB/Swiss-Prot;Acc:Q39086]
AT1G65800	1.14923	7.15395e-12	7.16466e-11	5.49927	4.72743	5.68403	3.28879	2.17646	2.20902	SD16	Receptor-like serine/threonine-protein kinase SD1-6 [Source:UniProtKB/Swiss-Prot;Acc:Q9S972]
AT1G65845	2.00447	1.21221e-24	2.81428e-23	141.541	158.636	183.585	38.1811	37.4588	51.6775		unknown protein; FUNCTIONS IN: molecular_function unknown; INVOLVED IN: biological_process unknown; LOCATED IN: endomembrane system; Has 9 Blast hits to 9 proteins in 2 species: Archae - 0; Bacteria - 0; Metazoa - 0; Fungi - 0; Plants - 9; Viruses - /.../her Eukaryotes - 0 (source: NCBI BLink). [Source:TAIR;Acc:AT1G65845]	molecular_function|biological_process
AT1G65860	3.5296	9.31686e-51	5.27601e-49	8.74022	7.44117	7.05055	0.772897	0.498514	0.752769	FMOGS-OX1	Flavin-containing monooxygenase FMO GS-OX1 [Source:UniProtKB/Swiss-Prot;Acc:Q9SS04]
AT1G65870	1.71207	1.06195e-10	9.57516e-10	8.7823	8.5664	8.05672	3.77643	1.3164	2.01764	DIR21	Dirigent protein 21 [Source:UniProtKB/Swiss-Prot;Acc:Q9SS03]	molecular_function|extracellular region|defense response|lignan biosynthetic process|apoplast|cell wall
AT1G65890	5.45624	1.30839e-49	7.1946e-48	3.62869	4.79401	3.58978	0.0930791	0.116851	0.0939468	AAE12	Probable acyl-activating enzyme 12, peroxisomal [Source:UniProtKB/Swiss-Prot;Acc:Q9SS00]	mitochondrion|peroxisome|fatty acid metabolic process|ligase activity
AT1G66090	2.0722	1.94254e-27	5.07858e-26	13.058	12.679	14.7025	2.32819	2.67247	4.85106		Disease resistance protein (TIR-NBS class) [Source:TAIR;Acc:AT1G66090]	ATP binding|defense response|signal transduction|chloroplast|ADP binding
AT1G66100	2.27748	3.10063e-06	1.67009e-05	60.9383	43.338	31.1389	13.5546	7.90796	7.96936		Probable thionin-2.4 [Source:UniProtKB/Swiss-Prot;Acc:Q9C8D6]	extracellular region|defense response|toxin receptor binding
AT1G66270	1.07959	5.573e-12	5.64896e-11	208.275	255.274	240.464	139.848	128.705	92.4415	BGLU21	Beta-glucosidase 21 [Source:UniProtKB/Swiss-Prot;Acc:Q9C525]	hydrolase activity, hydrolyzing O-glycosyl compounds|extracellular region|endoplasmic reticulum lumen|carbohydrate metabolic process|glucosinolate catabolic process|vacuole|membrane|response to salt stress|response to osmotic stress|beta-glucosidase activity|coumarin metabolic process|cellular response to cold|cellular response to salt stress|plasmodesma|endoplasmic reticulum|response to cytokini…
AT1G66280	1.2821	1.81629e-11	1.75522e-10	196.405	266.94	254.224	114.44	111.876	89.2289	BGLU22	Beta-glucosidase 22 [Source:UniProtKB/Swiss-Prot;Acc:Q9C8Y9]	hydrolase activity, hydrolyzing O-glycosyl compounds|endoplasmic reticulum lumen|carbohydrate metabolic process|chloroplast|response to hormone|glucosinolate catabolic process|membrane|response to salt stress|beta-glucosidase activity|cellular response to cold|cellular response to salt stress|plasmodesma|endoplasmic reticulum
AT1G66360	4.3279	0.00374286	0.0112118	0.310705	0.310873	0.452368	0	0	0.0626484		Calcium-dependent lipid-binding (CaLB domain) family protein [Source:TAIR;Acc:AT1G66360]
AT1G66370	Inf	2.27901e-09	1.81337e-08	1.87472	0.803437	0.927532	0	0	0	MYB113	Transcription factor MYB113 [Source:UniProtKB/Swiss-Prot;Acc:Q9FNV9]	DNA binding|transcription factor activity, sequence-specific DNA binding|nucleus|transcription, DNA-templated|multicellular organism development|regulation of transcription, DNA-templated|response to jasmonic acid|regulation of anthocyanin biosynthetic process
AT1G66450	1.58035	7.45871e-05	0.000317097	0.645887	0.684238	0.984495	0.492222	0.214113	0.142871		Cysteine/Histidine-rich C1 domain family protein [Source:TAIR;Acc:AT1G66450]	cellular_component|metal ion binding|protein-disulfide reductase activity|oxidation-reduction process
AT1G66480	1.54287	7.97956e-16	1.09954e-14	8.59606	9.64026	9.7254	3.99653	2.89839	3.48804		Uncharacterized protein At1g66480 [Source:UniProtKB/Swiss-Prot;Acc:Q6NLC8]	molecular_function|plasma membrane
AT1G66590	1.68787	2.99719e-16	4.24224e-15	9.20005	6.41693	8.18785	2.70557	2.29178	3.01601	ATCOX19-1	cytochrome c oxidase 19-1 [Source:TAIR;Acc:AT1G66590]
AT1G66600	Inf	7.66556e-31	2.31399e-29	3.44482	4.38285	3.54017	0	0	0	WRKY63	Probable WRKY transcription factor 63 [Source:UniProtKB/Swiss-Prot;Acc:Q9C6H5]
AT1G66700	3.14982	2.57134e-33	8.59254e-32	8.96607	7.67199	10.372	1.32622	0.844033	1.20416	PXMT1	S-adenosyl-L-methionine-dependent methyltransferases superfamily protein [Source:TAIR;Acc:AT1G66700]	nucleus|methyltransferase activity|S-adenosylmethionine-dependent methyltransferase activity|methylation
AT1G66780	4.99012	4.583e-27	1.17975e-25	2.43411	2.55098	2.76593	0.0905138	0.0448323	0.0903534		MATE efflux family protein [Source:TAIR;Acc:AT1G66780]	transporter activity|plasma membrane|antiporter activity|membrane|integral component of membrane
AT1G66830	1.57978	0.00117571	0.00394682	0.583934	0.55458	0.657123	0.395517	0.176407	0.101802		Probable inactive leucine-rich repeat receptor-like protein kinase At1g66830 [Source:UniProtKB/Swiss-Prot;Acc:Q9C9N5]	protein kinase activity|protein serine/threonine kinase activity|ATP binding|plasma membrane|protein phosphorylation|transmembrane receptor protein tyrosine kinase signaling pathway|integral component of membrane|kinase activity
AT1G66860	Inf	3.14255e-07	1.95108e-06	0.294098	0.262386	0.514449	0	0	0		Class I glutamine amidotransferase-like superfamily protein [Source:TAIR;Acc:AT1G66860]	nucleus|glutamine metabolic process|transferase activity
AT1G66880	1.98658	5.68527e-37	2.11393e-35	9.67751	10.4258	12.577	3.26043	2.49198	3.27816		Protein kinase superfamily protein [Source:TAIR;Acc:AT1G66880]	protein serine/threonine kinase activity|ATP binding|plasma membrane|protein phosphorylation|integral component of membrane
AT1G66920	4.5016	3.08383e-176	1.09453e-173	19.6189	20.562	23.1359	0.839791	1.12153	1.03091		Protein kinase superfamily protein [Source:TAIR;Acc:AT1G66920]	protein serine/threonine kinase activity|ATP binding|plasma membrane|protein phosphorylation|integral component of membrane|kinase activity|phosphorylation
AT1G66930	6.0871	5.0727e-05	0.000222358	0.224688	0.617016	0.335165	0	0	0		Protein kinase superfamily protein [Source:TAIR;Acc:AT1G66930]
AT1G66950	1.62165	0.0232973	0.0560767	0.122467	0.283269	0.126489	0.110237	0.0406325	0.0101864	ABCG39	ABC transporter G family member 39 [Source:UniProtKB/Swiss-Prot;Acc:Q7PC84]	ATP binding|integral component of membrane|ATPase activity, coupled to transmembrane movement of substances|drug transmembrane transport|response to reactive oxygen species|plasma membrane
AT1G66960	5.4165	3.73745e-06	1.98481e-05	0.105203	0.15817	0.25456	0.0173616	0	0	LUP5	Lupeol synthase 5 [Source:UniProtKB/Swiss-Prot;Acc:Q9FZI2]	nucleus|intramolecular transferase activity|pentacyclic triterpenoid biosynthetic process|lupeol synthase activity
AT1G67000	5.56536	1.04201e-24	2.43118e-23	0.875278	0.940877	0.887227	0.0172902	0.0174599	0		Probable receptor-like protein kinase At1g67000 [Source:UniProtKB/Swiss-Prot;Acc:Q3ECH2]	protein serine/threonine kinase activity|ATP binding|extracellular region|protein phosphorylation|integral component of membrane|kinase activity|phosphorylation
AT1G67150	1.59811	0.000307185	0.00116834	0.752631	1.11786	1.28145	0.446009	0.414013	0.187952		Plant protein of unknown function (DUF247) [Source:TAIR;Acc:AT1G67150]	molecular_function|plasma membrane|biological_process|integral component of membrane
AT1G67520	1.37081	3.40298e-11	3.22602e-10	1.69525	1.97635	1.94048	0.68105	0.815286	0.814162		lectin protein kinase family protein [Source:TAIR;Acc:AT1G67520]	plasma membrane|kinase activity|carbohydrate binding
AT1G67550	1.11761	2.50132e-21	4.87062e-20	9.35285	10.317	11.2874	5.35367	5.38194	4.27132	URE	Urease [Source:UniProtKB/Swiss-Prot;Acc:Q9SR52]	cytoplasm|urease activity|nickel cation binding|urea catabolic process|nitrogen compound metabolic process
AT1G67560	1.36763	6.06563e-48	3.16453e-46	34.4326	31.5846	32.4382	13.8335	13.4107	12.9261	LOX6	Lipoxygenase 6, chloroplastic [Source:UniProtKB/Swiss-Prot;Acc:Q9CAG3]	chloroplast|oxylipin biosynthetic process|growth|metal ion binding|linoleate 13S-lipoxygenase activity|lipid oxidation|plasma membrane|jasmonic acid biosynthetic process
AT1G67800	1.13987	3.39984e-19	5.83026e-18	10.6247	10.5204	11.6272	5.24129	4.80374	5.3328		Copine (Calcium-dependent phospholipid-binding protein) family [Source:TAIR;Acc:AT1G67800]	plasma membrane|zinc ion binding
AT1G67810	3.06057	1.2398e-113	2.36115e-111	37.5232	39.8606	44.1129	4.51831	5.48231	4.90229	SUFE2	SufE-like protein 2, chloroplastic [Source:UniProtKB/Swiss-Prot;Acc:Q9FXE3]	chloroplast|enzyme activator activity|iron-sulfur cluster assembly|positive regulation of sulfur metabolic process
AT1G67970	1.46116	3.01277e-10	2.60517e-09	2.8235	3.4182	3.75886	1.01041	1.31001	1.32199	HSFA8	Heat stress transcription factor A-8 [Source:UniProtKB/Swiss-Prot;Acc:Q9S7U5]	DNA binding|transcription factor activity, sequence-specific DNA binding|nucleus|cytoplasm|transcription, DNA-templated|regulation of transcription, DNA-templated|sequence-specific DNA binding
AT1G67980	5.3641	3.65792e-41	1.57223e-39	4.45082	4.38524	4.24027	0.110731	0	0.225842	CCOAMT	Putative caffeoyl-CoA O-methyltransferase At1g67980 [Source:UniProtKB/Swiss-Prot;Acc:Q9C9W3]	cytoplasm|O-methyltransferase activity|methylation|caffeoyl-CoA O-methyltransferase activity|metal ion binding|cytosol|lignin biosynthetic process
AT1G68290	3.77416	1.3934e-22	2.92476e-21	5.42043	3.94815	6.32504	0.166364	0.665807	0.421406	ENDO2	Endonuclease 2 [Source:UniProtKB/Swiss-Prot;Acc:Q9C9G4]	nucleic acid binding|endonuclease activity|extracellular region|DNA catabolic process|metal ion binding|single-stranded DNA endodeoxyribonuclease activity|T/G mismatch-specific endonuclease activity|nucleic acid phosphodiester bond hydrolysis
AT1G68340	1.10261	3.5078e-07	2.1584e-06	5.32581	5.36988	5.12613	3.17759	2.74514	1.99732		Protein of unknown function (DUF1639) [Source:TAIR;Acc:AT1G68340]	molecular_function|nucleus|biological_process
AT1G68390	1.52942	0.00621269	0.0175509	0.453381	0.991378	0.89919	0.242848	0.203237	0.329439		Core-2/I-branching beta-1,6-N-acetylglucosaminyltransferase family protein [Source:TAIR;Acc:AT1G68390]	acetylglucosaminyltransferase activity|integral component of membrane|transferase activity, transferring glycosyl groups
AT1G68585	1.7957	1.2188e-16	1.77773e-15	10.1496	11.6932	8.67289	2.4317	3.08673	3.50507		unknown protein; Has 23 Blast hits to 23 proteins in 6 species: Archae - 0; Bacteria - 0; Metazoa - 0; Fungi - 0; Plants - 23; Viruses - 0; Other Eukaryotes - 0 (source: NCBI BLink). [Source:TAIR;Acc:AT1G68585]	molecular_function|cellular_component|biological_process
AT1G68630	Inf	0.00622193	0.0175707	0.43919	0.176713	0.0920209	0	0	0	PCR12	Protein PLANT CADMIUM RESISTANCE 12 [Source:UniProtKB/Swiss-Prot;Acc:Q9SX26]	molecular_function|plasma membrane|biological_process|integral component of membrane
AT1G68650	1.02119	2.53473e-07	1.59271e-06	13.4739	15.4676	19.0936	9.11473	7.55139	8.07797		GDT1-like protein 5 [Source:UniProtKB/Swiss-Prot;Acc:Q9SX28]	molecular_function|biological_process|chloroplast|integral component of membrane
AT1G69520	3.14322	5.81288e-69	5.36089e-67	25.3281	24.9752	26.6214	3.29023	2.22091	2.49719		S-adenosyl-L-methionine-dependent methyltransferases superfamily protein [Source:TAIR;Acc:AT1G69520]	mitochondrion
AT1G69720	3.59176	8.52925e-09	6.38943e-08	0.905689	0.771795	0.849665	0.119113	0	0.166137	HO3	Heme oxygenase 3, chloroplastic [Source:UniProtKB/Swiss-Prot;Acc:Q9C9L4]	heme oxygenase (decyclizing) activity|heme oxidation|chloroplast|photosynthesis|metal ion binding|heme binding
AT1G69730	1.78445	9.9068e-21	1.86249e-19	8.49378	7.47175	8.1887	3.64316	1.86573	2.0453	WAKL9	Wall-associated receptor kinase-like 9 [Source:UniProtKB/Swiss-Prot;Acc:Q9C9L5]	calcium ion binding|ATP binding|extracellular region|protein phosphorylation|integral component of membrane|kinase activity|polysaccharide binding
AT1G69840	1.30504	2.11327e-26	5.27192e-25	37.5434	36.213	40.942	14.9075	15.4526	19.5934	HIR2	Hypersensitive-induced response protein 2 [Source:UniProtKB/Swiss-Prot;Acc:Q9CAR7]	plasma membrane|biological_process|chloroplast|vacuole|vacuolar membrane|protein binding|protein histidine kinase binding|plasmodesma
AT1G69870	1.96578	7.12752e-92	9.99773e-90	52.7497	54.4067	59.6308	15.5175	14.0138	16.4895	NPF2.13	Protein NRT1/ PTR FAMILY 2.13 [Source:UniProtKB/Swiss-Prot;Acc:Q8RX77]	transporter activity|plasma membrane|oligopeptide transport|symporter activity|membrane|integral component of membrane|nitrate assimilation|nitrate transport|low-affinity nitrate transmembrane transporter activity|low-affinity nitrate transport
AT1G69880	4.13773	3.39876e-20	6.17657e-19	8.86049	6.92205	11.0466	0.76892	0.154275	0.69829	TRX8	Thioredoxin H8 [Source:UniProtKB/Swiss-Prot;Acc:Q9CAS1]
AT1G69890	1.95488	1.42834e-12	1.53905e-11	16.1739	19.099	23.8346	3.29745	5.57353	7.07554		Protein of unknown function (DUF569) [Source:TAIR;Acc:AT1G69890]	molecular_function|nucleus|biological_process
AT1G69920	8.90597	1.33787e-18	2.21482e-17	5.32581	7.21121	10.2739	0.0563277	0	0	GSTU12	Glutathione S-transferase U12 [Source:UniProtKB/Swiss-Prot;Acc:Q6NMS0]	glutathione transferase activity|nucleus|cytoplasm|response to toxic substance|toxin catabolic process|glutathione metabolic process
AT1G69930	5.46886	8.11629e-53	4.93829e-51	6.81701	6.57814	6.90209	0.256717	0.155446	0.0525325	GSTU11	Glutathione S-transferase U11 [Source:UniProtKB/Swiss-Prot;Acc:Q9CAS6]	glutathione transferase activity|cytoplasm|cytosol|glutathione metabolic process|response to toxic substance|toxin catabolic process
AT1G70130	5.91269	6.47719e-44	2.98091e-42	2.19454	2.69536	3.0285	0.106945	0	0	LECRK52	Putative L-type lectin-domain containing receptor kinase V.2 [Source:UniProtKB/Swiss-Prot;Acc:O04533]
AT1G70260	2.34603	4.63602e-09	3.56646e-08	5.63332	4.73253	3.24229	0.428317	1.22882	0.909597		WAT1-related protein At1g70260 [Source:UniProtKB/Swiss-Prot;Acc:F4I5D5]
AT1G70700	2.67531	4.41804e-80	5.14889e-78	181.53	169.626	152.207	27.5333	30.3239	26.5656	TIFY7	Protein TIFY 7 [Source:UniProtKB/Swiss-Prot;Acc:Q8W4J8]	transcription corepressor activity|nucleus|transcription, DNA-templated|regulation of transcription, DNA-templated|defense response|response to wounding|regulation of defense response|negative regulation of nucleic acid-templated transcription|regulation of jasmonic acid mediated signaling pathway|response to jasmonic acid|protein binding
AT1G70720	2.84618	0.0013811	0.00456437	1.15217	0.69967	1.08778	0.172138	0.173756	0.0890715		Plant invertase/pectin methylesterase inhibitor superfamily protein [Source:TAIR;Acc:AT1G70720]	negative regulation of catalytic activity|pectinesterase inhibitor activity
AT1G70810	2.46654	1.96192e-54	1.24211e-52	22.7173	26.9806	25.2432	4.80993	3.46355	6.26304		Calcium-dependent lipid-binding (CaLB domain) family protein [Source:TAIR;Acc:AT1G70810]
AT1G71040	1.09567	7.88715e-30	2.29226e-28	34.5157	34.1433	38.5438	17.9517	17.3009	17.1435	LPR2	Multicopper oxidase LPR2 [Source:UniProtKB/Swiss-Prot;Acc:Q949X9]	copper ion binding|extracellular region|endoplasmic reticulum membrane|oxidoreductase activity, oxidizing metal ions|oxidation-reduction process|cell wall|membrane|cellular response to phosphate starvation|meristem maintenance|cytosol|Golgi apparatus
AT1G71050	1.05204	0.00759146	0.0209705	1.89752	1.01695	1.48068	0.660671	0.870428	0.570589	HIPP20	Heavy metal transport/detoxification superfamily protein [Source:TAIR;Acc:AT1G71050]	nucleus|cytoplasm|membrane|metal ion transport|metal ion binding|transition metal ion binding|cellular transition metal ion homeostasis
AT1G71140	2.49393	3.97779e-33	1.3161e-31	8.62506	9.31235	11.353	1.58673	1.71896	2.042		MATE efflux family protein [Source:TAIR;Acc:AT1G71140]	transporter activity|plasma membrane|antiporter activity|membrane|integral component of membrane|vacuolar membrane
AT1G71170	1.02487	4.84746e-15	6.36144e-14	14.882	12.7503	13.5787	7.34285	6.68763	7.60714		Probable 3-hydroxyisobutyrate dehydrogenase-like 2, mitochondrial [Source:UniProtKB/Swiss-Prot;Acc:Q9C991]	phosphogluconate dehydrogenase (decarboxylating) activity|mitochondrion|pentose-phosphate shunt|valine catabolic process|3-hydroxyisobutyrate dehydrogenase activity|NAD binding|oxidation-reduction process
AT1G71390	Inf	0.025023	0.0597273	0	0.126144	0.184011	0	0	0	AtRLP11	receptor like protein 11 [Source:TAIR;Acc:AT1G71390]
AT1G71400	1.21108	1.37719e-22	2.89854e-21	10.1173	10.9697	11.4167	5.42948	4.98865	4.57609	RLP12	Receptor-like protein 12 [Source:UniProtKB/Swiss-Prot;Acc:Q9C9H7]	plasma membrane|defense response|integral component of membrane|signal transduction
AT1G71520	2.47267	0.00447338	0.0131364	1.22763	1.08788	1.68255	0	0.133094	0.404255	ERF020	Ethylene-responsive transcription factor ERF020 [Source:UniProtKB/Swiss-Prot;Acc:Q9C9I8]	DNA binding|transcription factor activity, sequence-specific DNA binding|nucleus|transcription, DNA-templated|regulation of transcription, DNA-templated|ethylene-activated signaling pathway|response to chitin
AT1G71880	1.94236	1.06586e-32	3.44858e-31	83.3005	90.4371	104.75	25.1802	27.7075	23.8717	SUC1	Sucrose transport protein SUC1 [Source:UniProtKB/Swiss-Prot;Acc:Q39232]	sugar:proton symporter activity|vacuolar membrane|plasma membrane|integral component of plasma membrane|sucrose metabolic process|sucrose:proton symporter activity|carbohydrate transmembrane transporter activity|sucrose transport|membrane|vacuole|response to nematode|pollen germination|plasmodesma|proton transport|carbohydrate transmembrane transport|cation transmembrane transport
AT1G71890	2.50221	3.9069e-21	7.52625e-20	6.15334	6.28116	7.90534	1.17134	1.11172	1.5951	SUC5	Sucrose transport protein SUC5 [Source:UniProtKB/Swiss-Prot;Acc:Q9C8X2]	sugar:proton symporter activity|plasma membrane|integral component of plasma membrane|sucrose metabolic process|sucrose:proton symporter activity|sucrose transmembrane transporter activity|carbohydrate transmembrane transporter activity|symporter activity|sucrose transport|membrane|seed development|plasmodesma|biotin transporter activity
AT1G72000	Inf	0.00186423	0.00597639	0.0355534	0.0356408	0.1104	0	0	0	INVF	Probable alkaline/neutral invertase F [Source:UniProtKB/Swiss-Prot;Acc:Q9C560]
AT1G72060	2.81935	1.69952e-33	5.69546e-32	88.2639	80.1765	98.8869	9.4793	14.4266	12.0044		serine-type endopeptidase inhibitors [Source:TAIR;Acc:AT1G72060]	serine-type endopeptidase inhibitor activity|extracellular region|integral component of membrane|response to oxidative stress
AT1G72260	Inf	3.2925e-07	2.03716e-06	0.774573	1.31162	0.517893	0	0	0	THI2.1	Thionin-2.1 [Source:UniProtKB/Swiss-Prot;Acc:Q42596]	extracellular region|response to salicylic acid|defense response|toxin receptor binding|jasmonic acid mediated signaling pathway
AT1G72280	1.45973	1.24021e-21	2.44957e-20	7.04691	7.42148	8.2734	3.25031	2.44704	3.33465	AERO1	Endoplasmic reticulum oxidoreductin-1 [Source:UniProtKB/Swiss-Prot;Acc:Q9C7S7]
AT1G72360	1.81991	2.17947e-20	4.02e-19	6.42654	6.87014	7.30845	1.70039	2.37898	2.05622	ERF073	Ethylene-responsive transcription factor ERF073 [Source:UniProtKB/Swiss-Prot;Acc:Q8H0T5]
AT1G72450	2.31433	1.06832e-126	2.47775e-124	100.806	94.7323	90.9401	23.2537	20.5217	18.6507	TIFY11B	Protein TIFY 11B [Source:UniProtKB/Swiss-Prot;Acc:Q9C9E3]
AT1G72520	4.7524	2.76021e-121	6.04279e-119	15.4593	15.5376	18.2855	0.463955	0.436263	1.0606	LOX4	Lipoxygenase 4, chloroplastic [Source:UniProtKB/Swiss-Prot;Acc:Q9FNX8]	chloroplast|oxylipin biosynthetic process|metal ion binding|response to wounding|response to bacterium|linoleate 13S-lipoxygenase activity|response to ozone|pollen development|anther dehiscence|anther development|stamen filament development|lipid oxidation|jasmonic acid biosynthetic process|defense response|growth
AT1G72540	4.7672	1.61467e-10	1.43e-09	0.442508	0.643168	0.740899	0.0332022	0.0670758	0		Putative receptor-like protein kinase At1g72540 [Source:UniProtKB/Swiss-Prot;Acc:Q9CAH1]	protein serine/threonine kinase activity|ATP binding|plasma membrane|protein phosphorylation|kinase activity|phosphorylation
AT1G72680	1.86998	5.96246e-66	5.04226e-64	39.7991	43.3177	41.896	11.825	12.4235	11.7891	CAD1	Probable cinnamyl alcohol dehydrogenase 1 [Source:UniProtKB/Swiss-Prot;Acc:Q9CAI3]	cytoplasm|zinc ion binding|chloroplast|cinnamyl-alcohol dehydrogenase activity|phytochelatin biosynthetic process|sinapyl alcohol dehydrogenase activity|oxidation-reduction process|glutathione gamma-glutamylcysteinyltransferase activity|immune response|cell death|plant-type hypersensitive response|regulation of salicylic acid metabolic process|response to arsenic-containing substance|response to …
AT1G72900	2.89072	1.97201e-53	1.21885e-51	51.7283	52.1731	63.7579	6.76973	5.92238	9.05923		Toll-Interleukin-Resistance (TIR) domain-containing protein [Source:TAIR;Acc:AT1G72900]	cytoplasm|defense response|signal transduction|ADP binding
AT1G72920	1.40869	4.86445e-28	1.30826e-26	24.0497	23.6955	25.9706	10.4699	7.15028	10.5909		Toll-Interleukin-Resistance (TIR) domain family protein [Source:TAIR;Acc:AT1G72920]	cytoplasm|defense response|signal transduction|response to wounding
AT1G72930	2.09321	4.6728e-93	6.71536e-91	68.4033	67.3574	77.8076	19.5481	14.6532	20.5405	TIR	Toll/interleukin-1 receptor-like protein [Source:UniProtKB/Swiss-Prot;Acc:Q9SSN3]	cytoplasm|defense response|signal transduction|plasmodesma
AT1G72940	1.08616	3.04122e-15	4.05698e-14	36.1223	38.3291	43.4383	18.4847	15.9934	22.4402		Toll-Interleukin-Resistance (TIR) domain-containing protein [Source:TAIR;Acc:AT1G72940]	cytoplasm|defense response|signal transduction|ADP binding
AT1G73325	Inf	3.39423e-06	1.81695e-05	1.06134	0.485382	0.805462	0	0	0		Kunitz family trypsin and protease inhibitor protein [Source:TAIR;Acc:AT1G73325]	endopeptidase inhibitor activity|extracellular region|proteolysis|peptidase activity
AT1G73500	1.65142	2.14193e-56	1.45857e-54	56.2208	53.6614	52.6852	15.8915	18.6998	21.5208	MKK9	Mitogen-activated protein kinase kinase 9 [Source:UniProtKB/Swiss-Prot;Acc:Q9FX43]	receptor signaling protein serine/threonine kinase activity|ATP binding|nucleus|cytoplasm|mitochondrion|kinase activity|MAP kinase kinase activity|response to wounding|ethylene-activated signaling pathway|response to salt stress|ethylene biosynthetic process|camalexin biosynthetic process|protein kinase activator activity|positive regulation of transcription, DNA-templated|protein autophosphoryla…
AT1G73805	6.12124	1.62272e-156	4.93666e-154	19.5802	19.2147	23.472	0.237114	0.29621	0.298445	SARD1	Protein SAR DEFICIENT 1 [Source:UniProtKB/Swiss-Prot;Acc:Q9C9T2]	calmodulin binding|nucleus|defense response to oomycetes|transcription factor activity, sequence-specific DNA binding|response to bacterium|regulation of systemic acquired resistance|response to UV-B|defense response to bacterium|sequence-specific DNA binding|regulation of salicylic acid biosynthetic process|cellular response to molecule of bacterial origin|positive regulation of defense response…
AT1G73810	2.45868	6.18442e-18	9.85511e-17	3.25999	4.57976	4.53928	0.546691	0.924512	0.86882		Core-2/I-branching beta-1,6-N-acetylglucosaminyltransferase family protein [Source:TAIR;Acc:AT1G73810]	mitochondrion|acetylglucosaminyltransferase activity|integral component of membrane|transferase activity, transferring glycosyl groups
AT1G74010	1.42239	8.3796e-12	8.33512e-11	7.54934	9.3031	10.2029	3.00163	4.10181	3.55791		Calcium-dependent phosphotriesterase superfamily protein [Source:TAIR;Acc:AT1G74010]	extracellular region|biosynthetic process|strictosidine synthase activity|plant-type cell wall|cytosol|plasma membrane
AT1G74090	1.481	2.13984e-44	9.96534e-43	45.9438	45.8756	44.4186	21.2299	13.7556	16.5571	SOT18	Cytosolic sulfotransferase 18 [Source:UniProtKB/Swiss-Prot;Acc:Q9C9C9]	cytoplasm|sulfotransferase activity|glucosinolate biosynthetic process|desulfoglucosinolate sulfotransferase activity|3-methylthiopropyl-desulfoglucosinolate sulfotransferase activity|4-methylthiobutyl-desulfoglucosinolate sulfotransferase activity|5-methylthiopentyl-desulfoglucosinolate sulfotransferase activity|7-methylthioheptyl-desulfoglucosinolate sulfotransferase activity|8-methylthiooctyl-…
AT1G74100	1.50934	1.00932e-65	8.44401e-64	167.344	170.557	184.229	75.347	58.6014	60.221	SOT16	Cytosolic sulfotransferase 16 [Source:UniProtKB/Swiss-Prot;Acc:Q9C9D0]	cytoplasm|sulfotransferase activity|glucosinolate biosynthetic process|response to jasmonic acid stimulus involved in jasmonic acid and ethylene-dependent systemic resistance|desulfoglucosinolate sulfotransferase activity
AT1G74140	Inf	0.00602499	0.0170928	0.202609	0.0508876	0.156899	0	0	0		Rhomboid-related intramembrane serine protease family protein [Source:TAIR;Acc:AT1G74140]	mitochondrion|integral component of membrane|chloroplast membrane
AT1G74360	1.3568	1.0882e-12	1.18508e-11	4.23728	4.61875	5.62483	2.07379	1.66617	2.17158		Probable LRR receptor-like serine/threonine-protein kinase At1g74360 [Source:UniProtKB/Swiss-Prot;Acc:C0LGJ1]	protein serine/threonine kinase activity|ATP binding|plasma membrane|protein phosphorylation|transmembrane receptor protein tyrosine kinase signaling pathway|integral component of membrane|mitochondrial membrane|mitochondrion
AT1G74430	2.58748	9.84292e-66	8.26417e-64	16.4009	14.7785	14.6697	2.56346	2.25162	3.09134	MYB95	myb domain protein 95 [Source:TAIR;Acc:AT1G74430]	DNA binding|transcription factor activity, sequence-specific DNA binding|nucleus|regulation of transcription, DNA-templated|response to salicylic acid|response to jasmonic acid
AT1G74440	2.65527	1.7908e-36	6.54438e-35	7.01358	6.21925	7.99184	0.974693	0.654821	1.22783		Protein of unknown function (DUF962) [Source:TAIR;Acc:AT1G74440]	molecular_function|biological_process|chloroplast|integral component of membrane
AT1G74590	1.44191	1.08702e-13	1.28929e-12	7.10903	7.56896	8.87867	3.53234	2.54796	3.21056	GSTU10	Glutathione S-transferase U10 [Source:UniProtKB/Swiss-Prot;Acc:Q9CA57]	glutathione transferase activity|cytoplasm|cytosol|glutathione metabolic process|response to toxic substance|toxin catabolic process
AT1G74710	2.7397	1.18063e-33	3.9908e-32	41.3189	44.3462	53.9575	7.72737	8.04517	6.71496	ICS1	Isochorismate synthase 1, chloroplastic [Source:UniProtKB/Swiss-Prot;Acc:Q9S7H8]
AT1G74930	1.25088	1.57399e-06	8.86526e-06	4.5109	4.99576	5.28468	2.03158	1.26512	3.33322	ERF018	Ethylene-responsive transcription factor ERF018 [Source:UniProtKB/Swiss-Prot;Acc:Q9S7L5]
AT1G74950	1.63769	5.49343e-54	3.44074e-52	52.1013	52.8482	49.9256	17.5564	18.3654	18.1887	TIFY10B	Protein TIFY 10B [Source:UniProtKB/Swiss-Prot;Acc:Q9S7M2]	transcription corepressor activity|nucleus|transcription, DNA-templated|regulation of transcription, DNA-templated|defense response|regulation of defense response|negative regulation of nucleic acid-templated transcription|regulation of jasmonic acid mediated signaling pathway|response to jasmonic acid|response to wounding|protein binding
AT1G75040	2.47104	4.27208e-05	0.000189893	3.48475	1.61229	2.37895	0.536722	0.42609	0.37673	PR5	Pathogenesis-related protein 5 [Source:UniProtKB/Swiss-Prot;Acc:P28493]	molecular_function|extracellular region|response to other organism|systemic acquired resistance|response to UV-B|vacuole|cell wall|regulation of anthocyanin biosynthetic process|apoplast|response to cadmium ion|response to virus
AT1G75830	3.93226	1.16419e-09	9.58897e-09	6.90893	15.3521	10.6735	0.638717	1.04144	0.422647	PDF1.1	Defensin-like protein 13 [Source:UniProtKB/Swiss-Prot;Acc:P30224]
AT1G75890	1.88617	0.0420975	0.0933044	0.136485	0.0899847	0.233991	0	0.0454274	0.0456199	EXL2	GDSL esterase/lipase EXL2 [Source:UniProtKB/Swiss-Prot;Acc:Q94CH7]	extracellular region|lipid catabolic process|lipase activity|carboxylic ester hydrolase activity|sexual reproduction|transferase activity, transferring acyl groups
AT1G75960	1.32804	2.97049e-14	3.67585e-13	5.19147	6.07907	5.1837	3.03853	1.82358	2.17295	AAE8	Probable acyl-activating enzyme 8 [Source:UniProtKB/Swiss-Prot;Acc:Q9LQS1]	mitochondrion|fatty acid metabolic process|ligase activity
AT1G76040	1.68089	4.79373e-42	2.11475e-40	17.1125	17.1934	19.3926	5.7911	6.36691	5.04867	CPK29	calcium-dependent protein kinase 29 [Source:TAIR;Acc:AT1G76040]	calmodulin-dependent protein kinase activity|calcium ion binding|calmodulin binding|ATP binding|plasma membrane|protein phosphorylation|abscisic acid-activated signaling pathway|calcium-dependent protein serine/threonine kinase activity|kinase activity|peptidyl-serine phosphorylation|intracellular signal transduction|protein autophosphorylation|nucleus|cytoplasm
AT1G76600	1.07048	3.31474e-08	2.31992e-07	28.3077	29.071	33.361	11.2646	14.7669	20.3428		unknown protein; FUNCTIONS IN: molecular_function unknown; INVOLVED IN: N-terminal protein myristoylation; LOCATED IN: nucleolus, nucleus; EXPRESSED IN: 24 plant structures; EXPRESSED DURING: 15 growth stages; BEST Arabidopsis thaliana protein match /.../nknown protein (TAIR:AT1G21010.1); Has 220 Blast hits to 220 proteins in 14 species: Archae - 0; Bacteria - 0; Metazoa - 0; Fungi - 0; Plants - …	molecular_function|nucleus|nucleolus
AT1G76640	5.99972	3.27076e-98	5.17686e-96	21.136	21.0918	20.9655	0.298493	0.286039	0.577192	CML39	Calcium-binding protein CML39 [Source:UniProtKB/Swiss-Prot;Acc:Q9SRE7]	calcium ion binding|biological_process|cytoplasm
AT1G76650	1.55506	1.02282e-21	2.03565e-20	21.3931	18.8867	22.2125	5.73572	6.84783	9.54353	CML38	Calcium-binding protein CML38 [Source:UniProtKB/Swiss-Prot;Acc:Q9SRE6]	calcium ion binding|nucleus|plasma membrane|response to wounding
AT1G76930	2.7351	5.54851e-45	2.64712e-43	2126.95	2224	2560.96	259.429	404.357	452.377	ATEXT4	extensin 4 [Source:TAIR;Acc:AT1G76930]
AT1G76960	4.50136	7.0777e-28	1.88833e-26	19.2555	18.0194	15.7172	0.265192	1.83485	0.267546		unknown protein; FUNCTIONS IN: molecular_function unknown; INVOLVED IN: biological_process unknown; LOCATED IN: endomembrane system; EXPRESSED IN: 9 plant structures; EXPRESSED DURING: 8 growth stages; Has 8 Blast hits to 8 proteins in 2 species: Ar /.../ 0; Bacteria - 0; Metazoa - 0; Fungi - 0; Plants - 8; Viruses - 0; Other Eukaryotes - 0 (source: NCBI BLink). [Source:TAIR;Acc:AT1G76960]	molecular_function|mitochondrion|biological_process
AT1G76970	1.1018	2.17558e-15	2.92554e-14	8.59898	8.48839	9.3282	4.44856	4.65299	3.83648		Target of Myb protein 1 [Source:TAIR;Acc:AT1G76970]	intracellular|Golgi stack|intracellular protein transport|intra-Golgi vesicle-mediated transport|protein transporter activity|protein transport
AT1G77360	1.08214	0.000466896	0.00170998	1.38638	1.2156	1.7607	0.759614	0.710212	0.739441		Pentatricopeptide repeat-containing protein At1g77360, mitochondrial [Source:UniProtKB/Swiss-Prot;Acc:Q9FVX2]
AT1G77510	1.19123	1.99139e-17	3.06896e-16	46.2803	50.9516	60.0537	26.8969	24.0179	22.4734	PDIL1-2	Protein disulfide isomerase-like 1-2 [Source:UniProtKB/Swiss-Prot;Acc:Q9SRG3]	protein disulfide isomerase activity|endoplasmic reticulum lumen|chloroplast|cell redox homeostasis|response to cadmium ion|endoplasmic reticulum|vacuolar membrane|plasma membrane|response to salt stress|response to endoplasmic reticulum stress|Golgi apparatus|chloroplast stroma|response to high light intensity|photoinhibition
AT1G78270	2.03321	3.24501e-53	2.00038e-51	15.7519	13.9438	13.5848	3.59593	3.84599	3.65343	UGT85A4	UDP-glycosyltransferase 85A4 [Source:UniProtKB/Swiss-Prot;Acc:Q9M9E7]	UDP-glycosyltransferase activity|flavonoid biosynthetic process|transferase activity, transferring hexosyl groups|intracellular membrane-bounded organelle|flavonoid glucuronidation|quercetin 3-O-glucosyltransferase activity|quercetin 7-O-glucosyltransferase activity|glucuronosyltransferase activity
AT1G78360	Inf	0.0016381	0.00532434	0.0844521	0.171284	0.874685	0	0	0	GSTU21	Glutathione S-transferase U21 [Source:UniProtKB/Swiss-Prot;Acc:F4IA73]	glutathione transferase activity|cytoplasm|cytosol|glutathione metabolic process|response to toxic substance|toxin catabolic process
AT1G78370	1.67634	6.01734e-33	1.97418e-31	207.051	178.533	190.457	77.059	46.5624	69.227	GSTU20	Glutathione S-transferase U20 [Source:UniProtKB/Swiss-Prot;Acc:Q8L7C9]	glutathione transferase activity|cytoplasm|cytosol|response to toxic substance|regulation of growth|toxin catabolic process|nucleus|enzyme binding|regulation of response to red or far red light|chloroplast|apoplast|response to cytokinin
AT1G78410	4.74666	7.42461e-22	1.48905e-20	8.27276	9.81071	13.1724	0.177143	0.611458	0.532428	VQ10	VQ motif-containing protein 10 [Source:UniProtKB/Swiss-Prot;Acc:Q8VYI5]	nucleus|response to oxidative stress|protein binding
AT1G78460	1.63215	9.21543e-66	7.76516e-64	126.76	118.409	122.256	37.6335	41.8458	44.9658		SOUL heme-binding family protein [Source:TAIR;Acc:AT1G78460]	cytoplasm|biological_process
AT1G78490	1.92817	3.20797e-41	1.38392e-39	32.1688	29.3881	26.7685	7.65089	6.91993	9.31646	CYP708A3	cytochrome P450, family 708, subfamily A, polypeptide 3 [Source:TAIR;Acc:AT1G78490]	monooxygenase activity|iron ion binding|endoplasmic reticulum|multicellular organism development|brassinosteroid homeostasis|sterol metabolic process|brassinosteroid biosynthetic process|oxidoreductase activity, acting on paired donors, with incorporation or reduction of molecular oxygen|oxygen binding|heme binding|oxidation-reduction process
AT1G78850	1.1383	3.49471e-44	1.61786e-42	510.405	509.833	542.495	244.72	244.846	268.705		D-mannose binding lectin protein with Apple-like carbohydrate-binding domain [Source:TAIR;Acc:AT1G78850]	plasma membrane|carbohydrate binding|cell wall|vacuolar membrane|plant-type cell wall|apoplast|cytosol|Golgi apparatus
AT1G78860	2.59103	2.23342e-34	7.6938e-33	9.40982	10.4577	11.5069	2.55234	1.8324	1.32857		D-mannose binding lectin protein with Apple-like carbohydrate-binding domain [Source:TAIR;Acc:AT1G78860]	plasma membrane|carbohydrate binding|cell wall|plant-type cell wall
AT1G79310	1.21509	5.31245e-11	4.94218e-10	5.42464	7.15397	5.86781	2.66917	2.89892	2.45822	AMC7	Metacaspase-7 [Source:UniProtKB/Swiss-Prot;Acc:Q6XPT5]
AT1G79400	6.54562	4.34615e-14	5.31916e-13	0.608128	0.624687	0.767197	0	0.0232486	0	CHX2	Cation/H(+) antiporter 2 [Source:UniProtKB/Swiss-Prot;Acc:Q9SAK8]	monovalent cation:proton antiporter activity|potassium ion transport|regulation of pH|endomembrane system|sodium:proton antiporter activity|integral component of membrane|cation transport
AT1G79680	5.38472	3.4122e-59	2.45187e-57	2.61545	2.49317	2.99363	0.0887145	0.0179755	0.0721456	WAKL10	Wall-associated receptor kinase-like 10 [Source:UniProtKB/Swiss-Prot;Acc:Q8VYA3]	protein serine/threonine kinase activity|calcium ion binding|ATP binding|extracellular region|plasma membrane|protein phosphorylation|cell surface receptor signaling pathway|integral component of membrane|kinase activity|polysaccharide binding|guanylate cyclase activity|cGMP biosynthetic process|defense response|response to bacterium|response to fungus|response to salicylic acid
AT1G80130	2.71225	1.35103e-127	3.19675e-125	42.7497	42.8331	43.2562	6.60674	6.81825	7.22211		Tetratricopeptide repeat (TPR)-like superfamily protein [Source:TAIR;Acc:AT1G80130]	membrane|response to oxidative stress
AT1G80590	Inf	0.000388538	0.00144698	0.522287	0.374036	0.23221	0	0	0	WRKY66	Probable WRKY transcription factor 66 [Source:UniProtKB/Swiss-Prot;Acc:Q9M8M6]	transcription factor activity, sequence-specific DNA binding|nucleus|transcription, DNA-templated|regulation of transcription, DNA-templated|sequence-specific DNA binding
AT1G80820	1.00671	2.77184e-06	1.50403e-05	16.9696	18.1914	23.3654	8.97737	10.6075	11.0165	CCR2	Cinnamoyl-CoA reductase 2 [Source:UniProtKB/Swiss-Prot;Acc:Q9SAH9]	protein serine/threonine kinase activity|ATP binding|cellular_component|protein phosphorylation|defense response|phenylpropanoid biosynthetic process|lignin biosynthetic process|integral component of membrane|kinase activity|coenzyme binding|oxidation-reduction process|cinnamoyl-CoA reductase activity|protein kinase activity|protein homodimerization activity|circadian rhythm|response to cold|nega…
AT2G01610	1.42225	0.000308957	0.00117432	2.52355	1.8514	2.0305	0.497748	0.611202	1.24159		Plant invertase/pectin methylesterase inhibitor superfamily protein [Source:TAIR;Acc:AT2G01610]	extracellular region|negative regulation of catalytic activity|pectinesterase inhibitor activity
AT2G01670	1.05352	5.68821e-33	1.87144e-31	132.306	145.276	147.166	70.6313	67.4358	78.6083	NUDT17	Nudix hydrolase 17, mitochondrial [Source:UniProtKB/Swiss-Prot;Acc:Q9ZU95]	mitochondrion|hydrolase activity|metal ion binding
AT2G02010	4.91565	4.51862e-75	4.8113e-73	10.5647	11.8914	13.402	0.683356	0.211286	0.29263	GAD4	Glutamate decarboxylase 4 [Source:UniProtKB/Swiss-Prot;Acc:Q9ZPS3]	glutamate decarboxylase activity|calmodulin binding|glutamate metabolic process|pyridoxal phosphate binding|nucleus|cytosol
AT2G02250	2.21886	0.00277661	0.00854918	0.842647	0.506076	0.350798	0.0556024	0.168543	0.168733	PP2B2	Putative F-box protein PP2-B2 [Source:UniProtKB/Swiss-Prot;Acc:Q9ZVR5]
AT2G02310	4.201	9.63128e-05	0.000401375	0.425333	0.544705	0.251371	0.0601936	0	0	PP2B6	Putative F-box protein PP2-B6 [Source:UniProtKB/Swiss-Prot;Acc:Q9ZVR0]
AT2G02320	Inf	1.03986e-06	6.01007e-06	0.555874	0.500452	0.626295	0	0	0	PP2B7	F-box protein PP2-B7 [Source:UniProtKB/Swiss-Prot;Acc:Q9ZVQ9]
AT2G02340	5.18357	1.67412e-05	8.00495e-05	0.64891	0.714139	0.201393	0	0	0	PP2B8	Putative F-box protein PP2-B8 [Source:UniProtKB/Swiss-Prot;Acc:Q9ZVQ8]
AT2G02580	4.88298	1.11358e-14	1.42544e-13	0.692636	1.17004	1.18715	0.0588511	0	0.0301447	CYP71B9	Cytochrome P450 71B9 [Source:UniProtKB/Swiss-Prot;Acc:O64718]	iron ion binding|membrane|integral component of membrane|oxidoreductase activity, acting on paired donors, with incorporation or reduction of molecular oxygen, NAD(P)H as one donor, and incorporation of one atom of oxygen|oxygen binding|heme binding|secondary metabolite biosynthetic process|oxidation-reduction process
AT2G02810	1.29895	2.9924e-18	4.82762e-17	17.3226	18.3346	20.9825	7.22665	7.71008	9.19042	UTR1	UDP-galactose/UDP-glucose transporter 1 [Source:UniProtKB/Swiss-Prot;Acc:O64503]	chloroplast|pyrimidine nucleotide-sugar transmembrane transporter activity|integral component of Golgi membrane|UDP-galactose transmembrane transporter activity|UDP-glucose transmembrane transporter activity|nucleotide-sugar transport|Golgi membrane|endoplasmic reticulum membrane|endoplasmic reticulum unfolded protein response|embryo sac development|pollen development|integral component of endopl…
AT2G02930	5.17035	8.06805e-36	2.89868e-34	7.76906	11.0029	11.0486	0.251275	0.438735	0.256005	GSTF3	Glutathione S-transferase F3 [Source:UniProtKB/Swiss-Prot;Acc:Q9SLM6]	glutathione transferase activity|cytoplasm|cytosol|glutathione metabolic process|response to toxic substance|toxin catabolic process|plasma membrane|defense response to fungus
AT2G02990	3.16609	1.4621e-151	4.17678e-149	76.0918	76.0617	69.0309	7.49854	10.4889	8.4771	RNS1	Ribonuclease 1 [Source:UniProtKB/Swiss-Prot;Acc:P42813]	RNA binding|endoribonuclease activity|extracellular region|ribonuclease T2 activity|response to wounding|jasmonic acid mediated signaling pathway|cell wall|plasma membrane|ribonuclease activity|aging|cellular response to phosphate starvation|anthocyanin-containing compound biosynthetic process
AT2G03290	Inf	0.00898274	0.0243853	0.139101	0.206861	0.4312	0	0	0		Transmembrane emp24 domain-containing protein p24delta8 [Source:UniProtKB/Swiss-Prot;Acc:O81045]	endoplasmic reticulum membrane|intracellular protein transport|protein transmembrane transporter activity|protein transport|membrane|integral component of membrane|vesicle-mediated transport|Golgi cisterna membrane|endoplasmic reticulum-Golgi intermediate compartment membrane
AT2G04040	3.01705	1.00508e-30	3.01458e-29	20.494	25.0523	29.2871	2.44884	3.67649	3.4146	DTX1	MATE efflux family protein DTX1 [Source:UniProtKB/Swiss-Prot;Acc:Q9SIA5]	transporter activity|plasma membrane|drug transmembrane transport|antiporter activity|membrane|integral component of membrane|drug transmembrane transporter activity|cadmium ion transport|sequestering of metal ion
AT2G04070	Inf	2.92648e-10	2.53336e-09	0.977453	0.43339	1.0566	0	0	0	DTXL2	MATE efflux family protein 6 [Source:UniProtKB/Swiss-Prot;Acc:Q9SIA3]	transporter activity|plasma membrane|transport|antiporter activity|integral component of membrane
AT2G04080	1.63769	3.5329e-22	7.22148e-21	9.46866	8.68727	8.87237	2.82273	2.79337	3.43847	DTXL3	MATE efflux family protein 7 [Source:UniProtKB/Swiss-Prot;Acc:Q8GXM8]	transporter activity|plasma membrane|antiporter activity|membrane|integral component of membrane
AT2G04090	1.00116	4.73965e-05	0.000209128	2.86403	2.93015	3.09169	1.85707	1.49973	1.12915	DTXL4	MATE efflux family protein 8 [Source:UniProtKB/Swiss-Prot;Acc:Q9SIA1]	transporter activity|plasma membrane|antiporter activity|integral component of membrane|membrane
AT2G04400	1.90309	7.18453e-60	5.2593e-58	63.5317	65.3389	74.5164	21.8437	17.2113	19.4929		Indole-3-glycerol phosphate synthase, chloroplastic [Source:UniProtKB/Swiss-Prot;Acc:P49572]	tryptophan biosynthetic process|chloroplast|copper ion binding|chloroplast stroma|cytosol|indole-3-glycerol-phosphate synthase activity
AT2G04450	4.27085	3.72323e-31	1.13268e-29	8.0752	7.54772	10.7145	0.62812	0.338895	0.267594	NUDT6	Nudix hydrolase 6 [Source:UniProtKB/Swiss-Prot;Acc:Q9SJC4]	NAD+ diphosphatase activity|hydrolase activity|metal ion binding|cytosol|ADP-ribose diphosphatase activity|NAD binding|response to other organism|NADH pyrophosphatase activity|positive regulation of salicylic acid mediated signaling pathway
AT2G04495	6.71945	1.32279e-30	3.94228e-29	3.24819	2.75133	3.74209	0	0.0544175	0.0548493		unknown protein; FUNCTIONS IN: molecular_function unknown; INVOLVED IN: biological_process unknown; LOCATED IN: endomembrane system; BEST Arabidopsis thaliana protein match is: unknown protein (TAIR:AT2G04515.1); Has 30201 Blast hits to 17322 protei /.../780 species: Archae - 12; Bacteria - 1396; Metazoa - 17338; Fungi - 3422; Plants - 5037; Viruses - 0; Other Eukaryotes - 2996 (source: NCBI BLin…	molecular_function|biological_process|integral component of membrane
AT2G04515	Inf	1.46413e-10	1.30309e-09	1.69872	1.44854	2.86384	0	0	0		unknown protein; FUNCTIONS IN: molecular_function unknown; INVOLVED IN: biological_process unknown; LOCATED IN: endomembrane system; BEST Arabidopsis thaliana protein match is: unknown protein (TAIR:AT2G04495.1); Has 30201 Blast hits to 17322 protei /.../780 species: Archae - 12; Bacteria - 1396; Metazoa - 17338; Fungi - 3422; Plants - 5037; Viruses - 0; Other Eukaryotes - 2996 (source: NCBI BLin…	molecular_function|biological_process|chloroplast|integral component of membrane
AT2G05380	2.57655	2.79552e-49	1.51586e-47	3600.01	4293.82	4623.16	656.308	795.292	801.78	GRP3S	Glycine-rich protein 3 short isoform [Source:UniProtKB/Swiss-Prot;Acc:Q9ZSJ6]	molecular_function|extracellular region|proteinaceous extracellular matrix|biological_process|protein binding
AT2G05520	2.51245	9.14784e-104	1.58732e-101	1452.44	1653.19	1695.46	289.819	299.335	326.244	GRP3	Glycine-rich protein 3 [Source:UniProtKB/Swiss-Prot;Acc:Q9SL15]
AT2G05530	Inf	0.00161039	0.00524227	0	1.35448	2.80142	0	0	0		Glycine-rich protein family [Source:TAIR;Acc:AT2G05530]	molecular_function|extracellular region|biological_process
AT2G06050	2.71699	3.77218e-163	1.28063e-160	68.3628	68.6951	76.3278	11.8076	12.0249	11.4177	OPR3	12-oxophytodienoate reductase 3 [Source:UniProtKB/Swiss-Prot;Acc:Q9FUP0]	NADPH dehydrogenase activity|FMN binding|oxylipin biosynthetic process|oxidation-reduction process|jasmonic acid biosynthetic process|12-oxophytodienoate reductase activity|response to ozone|peroxisome|response to fungus
AT2G06255	1.1028	1.09065e-05	5.40708e-05	5.81462	6.11617	5.92696	2.97463	2.79736	3.24755	EFL3	Protein ELF4-LIKE 3 [Source:UniProtKB/Swiss-Prot;Acc:Q8S8F5]
AT2G11810	1.45693	0.00792992	0.0218077	1.27744	0.987934	0.544333	0.345764	0.436357	0.263003	MGD3	Monogalactosyldiacylglycerol synthase 3, chloroplastic [Source:UniProtKB/Swiss-Prot;Acc:Q9SI93]
AT2G13790	2.03053	2.67683e-32	8.53125e-31	27.2496	30.1924	34.8066	9.00974	6.95693	7.12304	SERK4	Somatic embryogenesis receptor kinase 4 [Source:UniProtKB/Swiss-Prot;Acc:Q9SKG5]	protein kinase activity|transmembrane receptor protein tyrosine kinase activity|ATP binding|plasma membrane|integral component of membrane|transmembrane receptor protein serine/threonine kinase activity|protein phosphorylation|negative regulation of cell death|regulation of seedling development|response to chitin|cell death|receptor serine/threonine kinase binding|brassinosteroid mediated signali…
AT2G13810	5.34871	1.60032e-21	3.14229e-20	1.84214	1.73452	1.68607	0	0.143925	0	ALD1	Aminotransferase ALD1 [Source:UniProtKB/Swiss-Prot;Acc:Q9ZQI7]	transaminase activity|lysine biosynthetic process via diaminopimelate|chloroplast|L,L-diaminopimelate aminotransferase activity|pyridoxal phosphate binding|systemic acquired resistance, salicylic acid mediated signaling pathway|defense response to bacterium|leaf senescence
AT2G14210	1.22706	0.000257087	0.000990736	1.58243	2.49239	1.79596	0.877615	0.802099	1.08491	ANR1	MADS-box transcription factor ANR1 [Source:UniProtKB/Swiss-Prot;Acc:Q9SI38]
AT2G14290	6.37043	5.80271e-12	5.86911e-11	0.882387	1.42035	1.05141	0.0449958	0	0		F-box protein At2g14290 [Source:UniProtKB/Swiss-Prot;Acc:Q9ZQ60]	molecular_function|biological_process|chloroplast
AT2G14510	1.14226	0.000746212	0.00261364	0.927328	0.711412	0.527217	0.315984	0.244263	0.414809		Leucine-rich repeat receptor-like serine/threonine-protein kinase At2g14510 [Source:UniProtKB/Swiss-Prot;Acc:Q9ZQR3]	protein serine/threonine kinase activity|ATP binding|plasma membrane|protein phosphorylation|integral component of membrane|kinase activity|phosphorylation
AT2G14560	Inf	2.33235e-194	1.01176e-191	26.4988	32.4579	33.1967	0	0	0	LURP1	Protein LURP1 [Source:UniProtKB/Swiss-Prot;Acc:Q9ZQR8]	molecular_function|response to salicylic acid|defense response to fungus
AT2G14580	2.73447	8.7225e-05	0.000366567	3.30706	1.6162	3.89625	0.846767	0.229462	0.387192	PRB1	Pathogenesis-related protein 1 [Source:UniProtKB/Swiss-Prot;Acc:Q9ZNS4]	molecular_function|extracellular region|response to ethylene|response to salicylic acid|response to jasmonic acid|response to wounding|response to bacterium|defense response, incompatible interaction|response to herbivore
AT2G14610	7.41982	0	0	107.92	98.9273	110.083	0.140951	1.1193	0.705268	PR1	Pathogenesis-related protein 1 [Source:UniProtKB/Swiss-Prot;Acc:P33154]	molecular_function|extracellular region|apoplast|systemic acquired resistance|cell wall|response to vitamin B1|response to water deprivation|defense response
AT2G15042	8.04307	2.87446e-73	2.94036e-71	2.41676	2.56058	2.74446	0.026098	0	0.0266291		Leucine-rich repeat (LRR) family protein [Source:TAIR;Acc:AT2G15042]	plasma membrane|integral component of membrane
AT2G15080	2.64637	1.62966e-118	3.34866e-116	20.0407	21.3784	22.0901	3.72038	3.69146	3.30928	AtRLP19	receptor like protein 19 [Source:TAIR;Acc:AT2G15080]
AT2G15390	1.45858	3.4741e-38	1.3496e-36	20.4635	21.4958	22.0464	9.99122	7.13677	8.57774	FUT4	Probable fucosyltransferase 4 [Source:UniProtKB/Swiss-Prot;Acc:Q9SJP2]	Golgi apparatus|protein glycosylation|galactoside 2-alpha-L-fucosyltransferase activity|fucosyltransferase activity|plant-type cell wall biogenesis|xyloglucan biosynthetic process|integral component of membrane|transferase activity, transferring glycosyl groups|Golgi cisterna membrane|cell wall organization|response to salt stress|alpha-(1,2)-fucosyltransferase activity
AT2G15490	1.47831	1.38614e-18	2.29301e-17	16.8216	17.997	21.0015	9.23647	6.72124	5.20611	UGT73B4	UDP-glycosyltransferase 73B4 [Source:UniProtKB/Swiss-Prot;Acc:Q7Y232]	metabolic process|UDP-glycosyltransferase activity|response to toxic substance|flavonoid biosynthetic process|transferase activity, transferring glycosyl groups|transferase activity, transferring hexosyl groups|intracellular membrane-bounded organelle|flavonol 3-O-glucosyltransferase activity|flavonoid glucuronidation|UDP-glucosyltransferase activity|quercetin 3-O-glucosyltransferase activity|que…
AT2G15760	1.71875	8.9372e-12	8.86717e-11	3.48134	4.42252	4.23936	1.57524	1.16334	1.17745		Protein of unknown function (DUF1645) [Source:TAIR;Acc:AT2G15760]	nucleus|biological_process|calmodulin binding|plasma membrane
AT2G15780	5.54248	1.61954e-12	1.73311e-11	1.30964	1.14442	1.9278	0.11853	0	0		Cupredoxin superfamily protein [Source:TAIR;Acc:AT2G15780]	extracellular region|electron carrier activity
AT2G16060	1.80901	1.15168e-66	9.99187e-65	68.9253	67.8679	68.5544	18.2078	19.9896	25.6932	AHB1	Non-symbiotic hemoglobin 1 [Source:UniProtKB/Swiss-Prot;Acc:O24520]
AT2G16430	1.15416	5.70555e-22	1.15516e-20	31.8956	36.3863	40.7857	19.4183	16.5577	16.1763	PAP10	Purple acid phosphatase 10 [Source:UniProtKB/Swiss-Prot;Acc:Q9SIV9]	protein serine/threonine phosphatase activity|extracellular region|metal ion binding|acid phosphatase activity|cell wall|plant-type cell wall|cytosol|plasmodesma|cellular response to phosphate starvation
AT2G16600	1.14065	4.34191e-43	1.97494e-41	711.9	771.62	813.423	395.613	351.825	369.062	CYP19-1	Peptidyl-prolyl cis-trans isomerase CYP19-1 [Source:UniProtKB/Swiss-Prot;Acc:Q38900]
AT2G16660	2.52632	3.84312e-51	2.2065e-49	8.98211	9.60286	10.8228	1.49093	2.15792	1.74579		Major facilitator superfamily protein [Source:TAIR;Acc:AT2G16660]	chloroplast|integral component of membrane|response to karrikin
AT2G16870	1.49334	1.06718e-11	1.05214e-10	1.99937	2.10379	2.30366	0.684982	0.526195	1.08473		Disease resistance protein (TIR-NBS-LRR class) family [Source:TAIR;Acc:AT2G16870]	ATP binding|defense response|signal transduction|ADP binding
AT2G17040	3.39296	5.04107e-37	1.88336e-35	7.50259	8.71064	9.85822	0.593407	0.804332	1.30512	anac036	NAC domain containing protein 36 [Source:TAIR;Acc:AT2G17040]
AT2G17050	2.44802	0.000983033	0.00336021	0.141205	0.174977	0.0974363	0	0.0700351	0.0117254		disease resistance protein (TIR-NBS-LRR class), putative [Source:TAIR;Acc:AT2G17050]	nucleus|defense response|signal transduction|integral component of membrane|ADP binding
AT2G17120	1.03396	2.14663e-20	3.96255e-19	43.7277	43.7624	50.7655	25.4062	24.8822	20.2981	LYM2	LysM domain-containing GPI-anchored protein 2 [Source:UniProtKB/Swiss-Prot;Acc:O23006]
AT2G17660	1.67075	0.00435844	0.0128343	3.36498	2.27759	2.15996	0.658711	0.956452	0.80312		RPM1-interacting protein 4 (RIN4) family protein [Source:TAIR;Acc:AT2G17660]	molecular_function|response to nitrate
AT2G17690	1.60598	0.000667484	0.00236584	0.941935	0.791881	0.57037	0.117432	0.314329	0.198365	SDC	F-box protein At2g17690 [Source:UniProtKB/Swiss-Prot;Acc:Q3EBY8]	double-strand break repair via homologous recombination|molecular_function|DNA binding|nucleus|chromosome|cytoplasm|biological_process|four-way junction helicase activity|ATP-dependent 3'-5' DNA helicase activity
AT2G17720	1.1681	1.83683e-37	6.97372e-36	78.5575	89.7703	91.555	44.6722	38.2735	40.3796	P4H5	Prolyl 4-hydroxylase 5 [Source:UniProtKB/Swiss-Prot;Acc:Q24JN5]	Golgi membrane|procollagen-proline 4-dioxygenase activity|iron ion binding|endoplasmic reticulum membrane|integral component of membrane|oxidoreductase activity, acting on paired donors, with incorporation or reduction of molecular oxygen, 2-oxoglutarate as one donor, and incorporation of one atom each of oxygen into both donors|peptidyl-proline hydroxylation to 4-hydroxy-L-proline|L-ascorbic aci…
AT2G17740	5.38065	2.70753e-32	8.6057e-31	5.4241	6.874	8.28345	0.155832	0.0517875	0.312727		Cysteine/Histidine-rich C1 domain family protein [Source:TAIR;Acc:AT2G17740]	nucleus
AT2G18150	4.05348	9.71887e-28	2.56958e-26	5.80868	7.27786	8.66244	0.436015	0.515886	0.444522	PER15	Peroxidase 15 [Source:UniProtKB/Swiss-Prot;Acc:Q9SI16]	peroxidase activity|extracellular region|response to oxidative stress|response to nematode|heme binding|hydrogen peroxide catabolic process|metal ion binding|oxidation-reduction process|cell wall
AT2G18193	1.37832	2.6158e-15	3.49744e-14	7.18027	5.84196	6.29728	2.53374	3.40559	1.9984		P-loop containing nucleoside triphosphate hydrolases superfamily protein [Source:TAIR;Acc:AT2G18193]	ATP binding|integral component of membrane|ATPase activity|endoplasmic reticulum
AT2G18660	8.29135	5.27477e-121	1.13359e-118	21.0559	20.491	21.7418	0.0824752	0	0.0825188	EGC2	EG45-like domain containing protein 2 [Source:UniProtKB/Swiss-Prot;Acc:Q9ZV52]
AT2G18670	1.29554	8.06597e-17	1.18983e-15	8.7186	8.62456	9.37887	3.03825	4.30947	4.38044	ATL56	RING-H2 finger protein ATL56 [Source:UniProtKB/Swiss-Prot;Acc:Q9ZV51]	nucleus|zinc ion binding|integral component of membrane|protein ubiquitination
AT2G18690	2.52445	4.44627e-45	2.12993e-43	253.177	275.131	314.692	45.1171	44.2249	66.5568		unknown protein; FUNCTIONS IN: molecular_function unknown; INVOLVED IN: biological_process unknown; LOCATED IN: membrane; EXPRESSED IN: 17 plant structures; EXPRESSED DURING: 9 growth stages; CONTAINS InterPro DOMAIN/s: Protein of unknown function D /.../(InterPro:IPR010380); BEST Arabidopsis thaliana protein match is: unknown protein (TAIR:AT2G18680.1); Has 213 Blast hits to 211 proteins in 20 s…	molecular_function|biological_process|chloroplast|integral component of membrane|membrane
AT2G19190	5.75808	3.76837e-49	2.03397e-47	10.6575	12.5728	15.2408	0.320594	0.154488	0.293698	SIRK	Senescence-induced receptor-like serine/threonine-protein kinase [Source:UniProtKB/Swiss-Prot;Acc:O64483]
AT2G19590	1.32095	4.77912e-13	5.38484e-12	10.8364	13.3322	10.5493	5.54026	4.54009	4.77657	ACO1	1-aminocyclopropane-1-carboxylate oxidase 1 [Source:UniProtKB/Swiss-Prot;Acc:Q9ZUN4]	aconitate hydratase activity|cytoplasm|tricarboxylic acid cycle|defense response|metabolic process|ethylene biosynthetic process|1-aminocyclopropane-1-carboxylate oxidase activity|L-ascorbic acid binding|metal ion binding|4 iron, 4 sulfur cluster binding|oxidation-reduction process|mitochondrion|cellular response to potassium ion starvation|vacuole|cytosol|citrate metabolic process|isocitrate met…
AT2G19800	1.36032	2.65054e-08	1.88148e-07	182.251	237.662	263.643	68.6672	100.895	111.066	MIOX2	Inositol oxygenase 2 [Source:UniProtKB/Swiss-Prot;Acc:O82200]	iron ion binding|cytoplasm|inositol catabolic process|L-ascorbic acid biosynthetic process|oxidation-reduction process|inositol oxygenase activity|syncytium formation
AT2G19970	1.16082	0.000248145	0.000959366	11.0477	17.9139	11.8227	6.19048	6.70509	6.11322		CAP (Cysteine-rich secretory proteins, Antigen 5, and Pathogenesis-related 1 protein) superfamily protein [Source:TAIR;Acc:AT2G19970]	molecular_function|extracellular region|biological_process
AT2G19990	2.01131	3.92672e-09	3.04884e-08	4.01328	3.84516	5.35113	1.36117	0.947432	1.36502	PR-1-LIKE	pathogenesis-related protein-1-like [Source:TAIR;Acc:AT2G19990]	molecular_function|extracellular region|defense response to bacterium
AT2G20142	4.14284	2.1582e-80	2.52779e-78	18.3653	18.4129	21.9196	0.485204	0.767938	1.48244		Toll-Interleukin-Resistance (TIR) domain family protein [Source:TAIR;Acc:AT2G20142]	cytoplasm|signal transduction|integral component of membrane
AT2G20150	3.43666	0.00738157	0.0204558	0	0.0415754	0	0	0	0		unknown protein; Has 5 Blast hits to 5 proteins in 1 species: Archae - 0; Bacteria - 0; Metazoa - 0; Fungi - 0; Plants - 5; Viruses - 0; Other Eukaryotes - 0 (source: NCBI BLink). [Source:TAIR;Acc:AT2G20150]	molecular_function|mitochondrion|biological_process
AT2G20570	1.59452	3.60535e-65	2.98429e-63	52.5353	52.5903	54.7185	20.0538	18.0774	18.7605	GLK1	Transcription activator GLK1 [Source:UniProtKB/Swiss-Prot;Acc:Q9SIV3]
AT2G20610	1.2517	7.29407e-34	2.48348e-32	47.0752	45.8462	45.2425	25.0738	17.7386	19.673	SUR1	S-alkyl-thiohydroximate lyase SUR1 [Source:UniProtKB/Swiss-Prot;Acc:Q9SIV0]	cytoplasm|cellular amino acid metabolic process|transaminase activity|pyridoxal phosphate binding|carbon-sulfur lyase activity|glucosinolate biosynthetic process|S-alkylthiohydroximate lyase activity|regulation of cell growth by extracellular stimulus|adventitious root development|membrane|indoleacetic acid biosynthetic process
AT2G21350	1.28059	7.05872e-05	0.000301734	3.12562	4.85682	4.53729	2.5249	1.19031	1.82616		RNA-binding CRS1 / YhbY (CRM) domain protein [Source:TAIR;Acc:AT2G21350]	RNA binding|biological_process|chloroplast
AT2G21550	1.33067	6.84891e-16	9.47082e-15	5.39859	6.13901	5.12514	2.28497	1.78332	2.52003		Bifunctional dihydrofolate reductase/thymidylate synthase [Source:TAIR;Acc:AT2G21550]	dihydrofolate reductase activity|thymidylate synthase activity|cytoplasm|dTMP biosynthetic process|glycine biosynthetic process|one-carbon metabolic process|methylation|tetrahydrofolate biosynthetic process|oxidation-reduction process
AT2G21650	1.40994	0.0391715	0.0876987	1.07882	1.63117	0.728735	0.400045	0.490491	0.202019	RL2	Protein RADIALIS-like 2 [Source:UniProtKB/Swiss-Prot;Acc:Q9SIJ5]	GTPase activity|GTP binding|nucleus|endoplasmic reticulum membrane|integral component of membrane|endoplasmic reticulum
AT2G21900	4.00791	0.000262193	0.00100836	0.471	0.284326	0.680444	0	0	0	WRKY59	Probable WRKY transcription factor 59 [Source:UniProtKB/Swiss-Prot;Acc:Q9SJ09]	transcription factor activity, sequence-specific DNA binding|nucleus|transcription, DNA-templated|regulation of transcription, DNA-templated|sequence-specific DNA binding
AT2G21910	1.79283	7.43938e-23	1.58569e-21	5.9001	6.2619	6.18784	1.2048	1.75662	2.60736	CYP96A5	cytochrome P450, family 96, subfamily A, polypeptide 5 [Source:TAIR;Acc:AT2G21910]	monooxygenase activity|iron ion binding|extracellular region|integral component of membrane|oxidoreductase activity, acting on paired donors, with incorporation or reduction of molecular oxygen|oxygen binding|heme binding|oxidation-reduction process
AT2G22500	1.14575	8.07031e-11	7.35591e-10	39.3739	41.2754	44.7424	18.7387	15.3011	26.6776	PUMP5	Mitochondrial uncoupling protein 5 [Source:UniProtKB/Swiss-Prot;Acc:Q9SJY5]
AT2G22760	4.08165	1.4072e-07	9.15147e-07	1.97878	2.67745	1.15522	0.098721	0.0503924	0.10272	BHLH19	Transcription factor bHLH19 [Source:UniProtKB/Swiss-Prot;Acc:Q1PF16]	DNA binding|nucleus|transcription, DNA-templated|protein dimerization activity|transcription factor activity, sequence-specific DNA binding|regulation of transcription, DNA-templated
AT2G22860	1.03388	0.000515287	0.0018717	22.5035	24.9754	34.0424	11.0883	14.2339	17.9757	PSK2	Phytosulfokines 2 [Source:UniProtKB/Swiss-Prot;Acc:O81003]	extracellular region|growth factor activity|cell proliferation|organ morphogenesis|cell differentiation|extracellular matrix
AT2G22880	2.2264	5.59206e-45	2.66248e-43	50.1308	60.0389	57.1799	8.47	6.84554	16.7526		VQ motif-containing protein [Source:TAIR;Acc:AT2G22880]
AT2G22890	1.40142	3.52346e-12	3.64886e-11	9.47882	10.3175	10.9736	3.76948	4.8081	4.33688	FAD4L2	Fatty acid desaturase 4-like 2, chloroplastic [Source:UniProtKB/Swiss-Prot;Acc:O81006]	fatty acid metabolic process|chloroplast|integral component of membrane|oxidoreductase activity|chloroplast membrane|oxidation-reduction process
AT2G23010	1.49274	6.1588e-09	4.68105e-08	3.57572	3.47268	2.62975	1.27315	1.39857	0.926656	SCPL9	Serine carboxypeptidase-like 9 [Source:UniProtKB/Swiss-Prot;Acc:O64811]	serine-type carboxypeptidase activity|extracellular region|proteolysis|transferase activity, transferring acyl groups other than amino-acyl groups|secondary metabolic process|sinapoylglucose-sinapoylglucose O-sinapoyltransferase activity|proteolysis involved in cellular protein catabolic process
AT2G23170	1.53599	1.62836e-29	4.68604e-28	38.0514	34.0982	34.7697	9.79059	15.4088	14.08	GH3.3	Indole-3-acetic acid-amido synthetase GH3.3 [Source:UniProtKB/Swiss-Prot;Acc:O22190]	cytoplasm|response to auxin|auxin homeostasis|indole-3-acetic acid amido synthetase activity
AT2G23200	2.16536	7.69226e-61	5.73857e-59	11.3495	10.6073	11.9828	2.92748	2.73829	2.51925		Probable receptor-like protein kinase At2g23200 [Source:UniProtKB/Swiss-Prot;Acc:O22187]	protein serine/threonine kinase activity|ATP binding|extracellular region|protein phosphorylation|integral component of membrane|kinase activity|phosphorylation
AT2G23270	Inf	0.000258304	0.000994867	0.776015	0.881429	0.804374	0	0	0		unknown protein; FUNCTIONS IN: molecular_function unknown; INVOLVED IN: biological_process unknown; LOCATED IN: endomembrane system; EXPRESSED IN: stem, sperm cell, root, stamen; EXPRESSED DURING: 4 anthesis; BEST Arabidopsis thaliana protein match /.../known protein (TAIR:AT4G37290.1); Has 36 Blast hits to 35 proteins in 6 species: Archae - 0; Bacteria - 0; Metazoa - 0; Fungi - 0; Plants - 36; V…	molecular_function|extracellular region|cellular response to hypoxia
AT2G23680	3.01855	1.6116e-56	1.10385e-54	13.8414	12.8133	15.7237	2.44033	1.69633	1.78208		Cold-regulated 413 plasma membrane protein 3 [Source:UniProtKB/Swiss-Prot;Acc:O64834]	molecular_function|mitochondrion|plasma membrane|integral component of membrane|membrane
AT2G23830	Inf	0.0326671	0.0750148	0.596904	0.199278	0.205048	0	0	0	PVA31	Vesicle-associated protein 3-1 [Source:UniProtKB/Swiss-Prot;Acc:O82213]	structural molecule activity|endoplasmic reticulum membrane|biological_process
AT2G24180	1.21635	3.24283e-24	7.41106e-23	43.0592	46.2455	52.0402	21.3784	20.8987	23.9194	CYP71B6	Cytochrome P450 71B6 [Source:UniProtKB/Swiss-Prot;Acc:O65787]	iron ion binding|integral component of membrane|oxidoreductase activity, acting on paired donors, with incorporation or reduction of molecular oxygen, NAD(P)H as one donor, and incorporation of one atom of oxygen|oxygen binding|heme binding|secondary metabolite biosynthetic process|oxidation-reduction process|mitochondrion|endoplasmic reticulum|plasma membrane|membrane|Golgi apparatus|monooxygena…
AT2G24200	1.01977	1.69538e-33	5.68973e-32	144.26	151.279	153.099	84.1608	75.6783	77.2924	PM25	Leucine aminopeptidase 1 [Source:UniProtKB/Swiss-Prot;Acc:P30184]
AT2G24600	2.88256	5.66422e-50	3.15165e-48	27.5042	29.5436	34.4681	4.25321	3.04935	6.11894		Ankyrin repeat family protein [Source:TAIR;Acc:AT2G24600]	biological_process|integral component of membrane
AT2G24850	7.13784	0	0	327.511	327.176	352.43	2.80931	2.78835	1.9869	TAT3	Probable aminotransferase TAT3 [Source:UniProtKB/Swiss-Prot;Acc:Q9SK47]	cytoplasm|cellular amino acid metabolic process|transaminase activity|biosynthetic process|pyridoxal phosphate binding|response to wounding|L-tyrosine:2-oxoglutarate aminotransferase activity|response to jasmonic acid
AT2G25000	2.11748	1.63319e-20	3.03631e-19	12.3478	10.9926	15.122	3.90401	3.32218	2.49675	WRKY60	Probable WRKY transcription factor 60 [Source:UniProtKB/Swiss-Prot;Acc:Q9SK33]	transcription factor activity, sequence-specific DNA binding|nucleus|transcription, DNA-templated|regulation of transcription, DNA-templated|sequence-specific DNA binding|regulation of defense response|response to salicylic acid|defense response to bacterium|protein binding|defense response to fungus|response to molecule of bacterial origin
AT2G25130	1.4348	0.00591752	0.0168328	0.728001	0.62419	0.71865	0.512109	0.104238	0.175667		ARM repeat superfamily protein [Source:TAIR;Acc:AT2G25130]
AT2G25200	1.08138	3.61674e-16	5.09147e-15	18.458	17.5193	15.5995	7.9623	9.73081	8.25207		Plant protein of unknown function (DUF868) [Source:TAIR;Acc:AT2G25200]	molecular_function|biological_process|chloroplast
AT2G25460	1.16991	2.51634e-08	1.79111e-07	2.99202	3.31042	3.00047	1.01852	1.27073	1.78183		CONTAINS InterPro DOMAIN/s: C2 calcium-dependent membrane targeting (InterPro:IPR000008); BEST Arabidopsis thaliana protein match is: unknown protein (TAIR:AT5G04860.1); Has 108 Blast hits to 69 proteins in 11 species: Archae - 0; Bacteria - 0; Meta /.../0; Fungi - 0; Plants - 108; Viruses - 0; Other Eukaryotes - 0 (source: NCBI BLink). [Source:TAIR;Acc:AT2G25460]	molecular_function|nucleus|biological_process
AT2G25470	4.75177	1.26827e-41	5.52218e-40	4.36125	5.31282	6.38583	0.19565	0.319593	0.180427	AtRLP21	receptor like protein 21 [Source:TAIR;Acc:AT2G25470]
AT2G25510	5.80641	1.68843e-140	4.4945e-138	820.462	829.712	970.214	20.3027	15.6718	16.8309		unknown protein; Has 2 Blast hits to 2 proteins in 1 species: Archae - 0; Bacteria - 0; Metazoa - 0; Fungi - 0; Plants - 2; Viruses - 0; Other Eukaryotes - 0 (source: NCBI BLink). [Source:TAIR;Acc:AT2G25510]	molecular_function|mitochondrion|biological_process|integral component of membrane
AT2G25680	1.05741	5.79207e-06	2.98458e-05	2.73429	3.36481	3.17638	2.01908	1.39316	1.44447	MOT1	Molybdate transporter 1 [Source:UniProtKB/Swiss-Prot;Acc:Q9SL95]	chloroplast|sulfate transmembrane transporter activity|integral component of membrane|mitochondrial membrane|vacuole|molybdate ion transmembrane transporter activity|molybdate ion transport|mitochondrion|plasma membrane|endomembrane system
AT2G25735	1.69609	5.508e-27	1.41475e-25	34.1655	35.3682	41.0756	12.3146	9.00184	15.1139		unknown protein; Has 31 Blast hits to 31 proteins in 9 species: Archae - 0; Bacteria - 0; Metazoa - 0; Fungi - 0; Plants - 31; Viruses - 0; Other Eukaryotes - 0 (source: NCBI BLink). [Source:TAIR;Acc:AT2G25735]	molecular_function|mitochondrion|biological_process|plasma membrane
AT2G26010	11.3542	7.48265e-119	1.56501e-116	136.831	113.993	117.08	0	0.152996	0	PDF1.3	Defensin-like protein 14 [Source:UniProtKB/Swiss-Prot;Acc:O80995]	molecular_function|extracellular region|cell wall|defense response|killing of cells of other organism|defense response to fungus
AT2G26020	Inf	1.45951e-37	5.57731e-36	172.717	116.841	105.944	0	0	0	PDF1.2B	Putative defensin-like protein 15 [Source:UniProtKB/Swiss-Prot;Acc:O80994]
AT2G26370	1.97649	2.60866e-08	1.85344e-07	14.9771	18.0474	11.0189	4.13332	2.74132	5.33649		MD-2-related lipid recognition domain-containing protein [Source:TAIR;Acc:AT2G26370]	molecular_function|biological_process
AT2G26380	3.90764	3.65804e-13	4.15968e-12	1.40457	1.43704	1.05277	0.0403167	0.0407464	0.249736		Leucine-rich repeat (LRR) family protein [Source:TAIR;Acc:AT2G26380]	extracellular region|defense response|signal transduction
AT2G26390	3.37049	1.9567e-15	2.6403e-14	1.91895	2.19494	2.50053	0.425392	0.214281	0.0537693		Serpin-Z3 [Source:UniProtKB/Swiss-Prot;Acc:O48706]	serine-type endopeptidase inhibitor activity|extracellular region|negative regulation of endopeptidase activity|regulation of proteolysis
AT2G26400	6.70264	1.73192e-46	8.70604e-45	15.862	11.9344	13.9574	0.181714	0.0610414	0	ARD1	1,2-dihydroxy-3-keto-5-methylthiopentene dioxygenase 1 [Source:UniProtKB/Swiss-Prot;Acc:O48707]	nucleus|plasma membrane|L-methionine biosynthetic process from methylthioadenosine|metal ion binding|oxidation-reduction process|acireductone dioxygenase [iron(II)-requiring] activity|cytosol|iron ion binding|regulation of cell division
AT2G26440	3.44016	4.58783e-50	2.55881e-48	42.1344	42.3338	52.4986	3.94199	4.38905	4.86073	PME12	Probable pectinesterase/pectinesterase inhibitor 12 [Source:UniProtKB/Swiss-Prot;Acc:O48711]	extracellular region|cell wall|plant-type cell wall|pectinesterase activity|cell wall modification|aspartyl esterase activity|pectin catabolic process|pectinesterase inhibitor activity|cell periphery|response to bacterium
AT2G26530	1.69895	6.76522e-28	1.80701e-26	47.029	53.6567	57.3885	15.5458	14.3033	21.4471	AR781	Protein of unknown function (DUF1645) [Source:TAIR;Acc:AT2G26530]	molecular_function|biological_process|chloroplast|plasma membrane
AT2G26560	5.08439	2.667e-91	3.65347e-89	57.2387	63.1935	74.962	1.46774	2.0348	2.42855	PLP2	Patatin-like protein 2 [Source:UniProtKB/Swiss-Prot;Acc:O48723]
AT2G26740	1.70873	3.73642e-79	4.26954e-77	151.143	147	160.746	48.496	50.8251	51.2398	ATSEH	soluble epoxide hydrolase [Source:TAIR;Acc:AT2G26740]
AT2G27150	1.206	6.2397e-33	2.04141e-31	9.90135	11.2658	11.7301	4.86009	4.98446	5.2096	AAO3	Abscisic-aldehyde oxidase [Source:UniProtKB/Swiss-Prot;Acc:Q7G9P4]	xanthine dehydrogenase activity|iron ion binding|electron carrier activity|xanthine catabolic process|auxin biosynthetic process|oxidoreductase activity, acting on CH-OH group of donors|flavin adenine dinucleotide binding|2 iron, 2 sulfur cluster binding|oxidation-reduction process|aldehyde oxidase activity|indole-3-acetaldehyde oxidase activity|abscisic acid biosynthetic process|abscisic aldehyd…
AT2G27310	1.68108	1.6265e-41	7.06879e-40	21.9664	21.6803	20.9809	6.65962	6.01399	8.03207		F-box protein At2g27310 [Source:UniProtKB/Swiss-Prot;Acc:Q9XIN8]	molecular_function|biological_process
AT2G27380	1.59853	0.0482551	0.104664	0.277169	0.248528	0.621259	0.0200459	0.208222	0.0971263	EPR1	Proline-rich extensin-like protein EPR1 [Source:UniProtKB/Swiss-Prot;Acc:Q9ZQI0]	DNA binding|extracellular region|nucleus|transcription, DNA-templated|primary cell wall|structural constituent of cell wall|plant-type cell wall modification|seed germination|transcription factor activity, sequence-specific DNA binding|regulation of transcription, DNA-templated|response to salt stress|response to ethylene|response to cadmium ion|circadian rhythm
AT2G27660	2.7574	1.03611e-22	2.19646e-21	10.902	10.6634	14.683	2.10329	2.30286	1.53655		Cysteine/Histidine-rich C1 domain family protein [Source:TAIR;Acc:AT2G27660]
AT2G27690	3.93676	2.71087e-93	3.91988e-91	13.0324	15.2995	15.5741	0.850554	0.865162	1.35851	CYP94C1	Cytochrome P450 94C1 [Source:UniProtKB/Swiss-Prot;Acc:Q9ZUX1]	iron ion binding|extracellular region|integral component of membrane|oxygen binding|heme binding|oxidation-reduction process|alkane 1-monooxygenase activity|intracellular membrane-bounded organelle|response to wounding
AT2G28120	1.74138	3.18886e-56	2.16519e-54	27.8703	30.4854	31.1881	7.63344	9.83512	10.8769		Major facilitator superfamily protein [Source:TAIR;Acc:AT2G28120]
AT2G28140	2.26399	3.18542e-21	6.16682e-20	7.10048	7.00604	5.39176	1.165	1.64709	1.73412		Protein of unknown function (DUF1635) [Source:TAIR;Acc:AT2G28140]	molecular_function|mitochondrion|biological_process
AT2G28210	5.43712	4.71255e-12	4.81848e-11	1.67263	1.65812	2.00994	0.0749146	0	0	ATACA2	alpha carbonic anhydrase 2 [Source:TAIR;Acc:AT2G28210]
AT2G28400	1.17502	5.68883e-12	5.7589e-11	24.3096	27.9528	27.7741	9.37463	12.9758	16.6366		Protein of unknown function, DUF584 [Source:TAIR;Acc:AT2G28400]	molecular_function|biological_process
AT2G28500	1.89348	1.39807e-05	6.80443e-05	1.70176	1.91863	1.88048	0.474875	0.472651	0.475629	LBD11	LOB domain-containing protein 11 [Source:UniProtKB/Swiss-Prot;Acc:Q9SK08]	nucleus|biological_process
AT2G28570	1.77045	4.09604e-28	1.10669e-26	29.3209	33.4644	36.7323	9.51244	8.84033	12.0737		unknown protein; Has 13 Blast hits to 13 proteins in 6 species: Archae - 0; Bacteria - 0; Metazoa - 0; Fungi - 0; Plants - 13; Viruses - 0; Other Eukaryotes - 0 (source: NCBI BLink). [Source:TAIR;Acc:AT2G28570]	molecular_function|biological_process
AT2G28630	1.11076	9.02706e-25	2.11248e-23	34.9752	34.4488	38.2569	16.5576	15.4931	20.6154	KCS12	3-ketoacyl-CoA synthase 12 [Source:UniProtKB/Swiss-Prot;Acc:Q9SIB2]	extracellular region|fatty acid biosynthetic process|membrane|transferase activity, transferring acyl groups|transferase activity, transferring acyl groups other than amino-acyl groups|endoplasmic reticulum
AT2G28690	2.85157	4.33177e-11	4.06538e-10	1.89862	2.77117	2.17793	0.413633	0.264933	0.323183		Protein of unknown function (DUF1635) [Source:TAIR;Acc:AT2G28690]	molecular_function|mitochondrion|biological_process
AT2G28755	3.31662	0.00019325	0.000763901	0	0	0	0	0	0		UDP-D-glucuronate carboxy-lyase-related [Source:TAIR;Acc:AT2G28755]	plasma membrane|biological_process|lyase activity
AT2G28780	1.08134	0.00949232	0.025632	6.23167	4.38546	3.04074	2.24026	2.14929	2.50119		unknown protein; INVOLVED IN: biological_process unknown; LOCATED IN: mitochondrion; EXPRESSED IN: inflorescence meristem, root, flower; EXPRESSED DURING: petal differentiation and expansion stage; CONTAINS InterPro DOMAIN/s: Protein of unknown func /.../UF939, bacterial (InterPro:IPR010343); BEST Arabidopsis thaliana protein match is: unknown protein (TAIR:AT3G09450.1); Has 671 Blast hits to 667…	plasma membrane|integral component of membrane
AT2G28860	4.17188	3.05702e-12	3.18694e-11	0.757799	1.14837	1.1827	0.10286	0.0340976	0.0345555	CYP710A4	Cytochrome P450 710A1 [Source:UniProtKB/Swiss-Prot;Acc:Q9ZV28]	monooxygenase activity|iron ion binding|extracellular region|integral component of membrane|sterol biosynthetic process|oxygen binding|heme binding|oxidation-reduction process|C-22 sterol desaturase activity
AT2G28940	1.16063	8.42167e-22	1.68613e-20	12.9295	14.628	14.6597	7.46409	6.15983	6.31356		Protein kinase superfamily protein [Source:TAIR;Acc:AT2G28940]	protein kinase activity|ATP binding|plasma membrane|protein phosphorylation|kinase activity|phosphorylation
AT2G29120	2.4519	5.37056e-66	4.55817e-64	7.57076	7.36678	8.15602	1.75766	1.20221	1.53582	GLR2.7	Glutamate receptor 2.7 [Source:UniProtKB/Swiss-Prot;Acc:Q8LGN0]	ionotropic glutamate receptor activity|intracellular ligand-gated ion channel activity|nucleus|integral component of membrane|cellular calcium ion homeostasis|response to light stimulus|vacuole
AT2G29340	1.38638	8.14154e-52	4.82824e-50	91.8086	92.0365	89.4152	33.111	35.4133	40.7587		Tropinone reductase homolog At2g29340 [Source:UniProtKB/Swiss-Prot;Acc:F4IKM1]	oxidoreductase activity|oxidation-reduction process
AT2G29350	6.26058	7.91823e-19	1.32206e-17	2.21977	1.55771	2.48854	0.0396291	0.0788652	0	SAG13	Senescence-associated protein 13 [Source:UniProtKB/Swiss-Prot;Acc:Q9ZW18]	chloroplast|oxidoreductase activity|oxidation-reduction process|aging|alcohol dehydrogenase (NAD) activity|defense response to insect
AT2G29440	1.57291	1.15674e-24	2.69082e-23	43.0767	52.396	47.5652	23.4914	14.9833	12.9895	GSTU6	Glutathione S-transferase U6 [Source:UniProtKB/Swiss-Prot;Acc:Q9ZW26]	glutathione transferase activity|cytoplasm|glutathione metabolic process|response to toxic substance|toxin catabolic process|cytosol
AT2G29460	3.32491	5.62604e-157	1.73408e-154	60.7877	65.4086	69.6309	7.25874	5.26291	8.50082	GSTU4	Glutathione S-transferase U4 [Source:UniProtKB/Swiss-Prot;Acc:Q9ZW27]	glutathione transferase activity|cytoplasm|cytosol|glutathione metabolic process|response to toxic substance|toxin catabolic process
AT2G29470	3.39202	1.62389e-22	3.39639e-21	4.78838	3.95943	5.12286	0.636623	0.256922	0.518306	GSTU3	Glutathione S-transferase U3 [Source:UniProtKB/Swiss-Prot;Acc:Q9ZW28]	glutathione transferase activity|cytoplasm|cytosol|glutathione metabolic process|response to toxic substance|toxin catabolic process
AT2G29720	2.93702	1.03812e-72	1.04369e-70	13.6959	13.9416	14.5969	1.87821	1.63453	2.28169	CTF2B	FAD/NAD(P)-binding oxidoreductase family protein [Source:TAIR;Acc:AT2G29720]	monooxygenase activity|secondary metabolite biosynthetic process|oxidation-reduction process|FAD binding
AT2G29990	1.45375	6.01588e-28	1.61238e-26	9.4875	10.8219	10.4825	3.60062	3.64595	4.36827	NDA2	Internal alternative NAD(P)H-ubiquinone oxidoreductase A2, mitochondrial [Source:UniProtKB/Swiss-Prot;Acc:O80874]	NADH dehydrogenase activity|mitochondrion|intrinsic component of mitochondrial inner membrane|peroxisome
AT2G30140	1.6597	5.93037e-40	2.43291e-38	36.01	36.2919	42.2827	14.0119	12.5975	12.2958	UGT87A2	UDP-glycosyltransferase 87A2 [Source:UniProtKB/Swiss-Prot;Acc:O64733]	nucleus|UDP-glycosyltransferase activity|flavonoid biosynthetic process|transferase activity, transferring glycosyl groups|transferase activity, transferring hexosyl groups|flavonoid glucuronidation|quercetin 3-O-glucosyltransferase activity|quercetin 7-O-glucosyltransferase activity|cytosol|cytoplasm|regulation of flower development
AT2G30490	1.00937	1.54838e-29	4.46134e-28	310.899	327.411	362.673	190.819	168.668	172.968	CYP73A5	Trans-cinnamate 4-monooxygenase [Source:UniProtKB/Swiss-Prot;Acc:P92994]
AT2G30550	1.39832	7.04561e-42	3.07917e-40	25.6431	24.5518	24.3828	8.6867	9.78149	11.0392		Phospholipase A1-Igamma2, chloroplastic [Source:UniProtKB/Swiss-Prot;Acc:Q3EBR6]
AT2G30660	5.92517	2.01074e-17	3.09675e-16	0.898702	0.932873	1.50067	0	0.0359249	0.0360551		Probable 3-hydroxyisobutyryl-CoA hydrolase 3 [Source:UniProtKB/Swiss-Prot;Acc:Q6NMB0]	3-hydroxyisobutyryl-CoA hydrolase activity|peroxisome|valine catabolic process|hydro-lyase activity
AT2G30670	4.90806	5.73203e-13	6.41226e-12	1.976	5.45951	6.15681	0	0.628055	0		Tropinone reductase homolog At2g30670 [Source:UniProtKB/Swiss-Prot;Acc:O49332]	cellular_component|oxidoreductase activity|oxidation-reduction process
AT2G30720	1.09982	2.86077e-20	5.23135e-19	16.8408	16.4669	17.436	8.7737	8.11762	8.60728		Thioesterase/thiol ester dehydrase-isomerase superfamily protein [Source:TAIR;Acc:AT2G30720]	mitochondrion|biological_process|hydrolase activity, acting on ester bonds|isomerase activity|acyl-CoA hydrolase activity
AT2G30750	7.33257	3.76001e-81	4.47098e-79	15.0402	14.2567	19.4903	0.127302	0.0520402	0.10528	CYP71A12	cytochrome P450, family 71, subfamily A, polypeptide 12 [Source:TAIR;Acc:AT2G30750]	membrane|oxidoreductase activity, acting on paired donors, with incorporation or reduction of molecular oxygen, NAD(P)H as one donor, and incorporation of one atom of oxygen|oxygen binding|secondary metabolite biosynthetic process|response to bacterium|induced systemic resistance
AT2G30770	8.22975	2.80745e-51	1.61982e-49	12.99	9.26105	9.50596	0.101557	0	0.0260719	CYP71A13	cytochrome P450, family 71, subfamily A, polypeptide 13 [Source:TAIR;Acc:AT2G30770]	membrane|oxidoreductase activity, acting on paired donors, with incorporation or reduction of molecular oxygen, NAD(P)H as one donor, and incorporation of one atom of oxygen|oxygen binding|response to bacterium|camalexin biosynthetic process|defense response to bacterium|indoleacetaldoxime dehydratase activity|defense response to fungus|protein binding|induced systemic resistance
AT2G30860	1.10921	3.29823e-41	1.42024e-39	701.033	691.45	696.593	385.965	308.568	332.32	GSTF9	Glutathione S-transferase F9 [Source:UniProtKB/Swiss-Prot;Acc:O80852]	glutathione transferase activity|cytoplasm|glutathione metabolic process|oxidation-reduction process|thylakoid|toxin catabolic process|glutathione binding|vacuole|copper ion binding|glutathione peroxidase activity|defense response|defense response to bacterium|plasma membrane|chloroplast|apoplast|chloroplast stroma|response to zinc ion|response to cadmium ion|cytosol|plasmodesma
AT2G30870	1.93354	2.85297e-117	5.71205e-115	948.169	951.532	973.516	290.374	234.583	270.887	GSTF10	Glutathione S-transferase F10 [Source:UniProtKB/Swiss-Prot;Acc:P42761]	glutathione transferase activity|cytoplasm|glutathione metabolic process|response to toxic substance|toxin catabolic process|glutathione binding|vacuole|cell wall|response to cadmium ion|copper ion binding|plasma membrane|chloroplast|apoplast|cytosol|response to water deprivation
AT2G30942	1.61408	4.87805e-05	0.00021475	2.18071	4.08762	3.54972	0.642759	0.651602	1.76124		Protein of unknown function (DUF3317) [Source:TAIR;Acc:AT2G30942]
AT2G30990	1.45277	7.94388e-45	3.74417e-43	24.0719	25.9963	26.2667	9.87421	9.58341	9.71621		Protein of unknown function (DUF688) [Source:TAIR;Acc:AT2G30990]	molecular_function|nucleus|biological_process
AT2G31141	1.82568	0.0016385	0.0053249	1.97799	1.20947	1.43416	0.256679	0.430613	0.519392		unknown protein; Has 30201 Blast hits to 17322 proteins in 780 species: Archae - 12; Bacteria - 1396; Metazoa - 17338; Fungi - 3422; Plants - 5037; Viruses - 0; Other Eukaryotes - 2996 (source: NCBI BLink). [Source:TAIR;Acc:AT2G31141]	mitochondrion
AT2G31180	1.41909	1.2316e-08	9.0724e-08	3.48622	3.86539	4.55602	1.42689	1.62313	1.8416	ATMYB14	myb domain protein 14 [Source:TAIR;Acc:AT2G31180]
AT2G31230	2.55796	1.92576e-35	6.87665e-34	12.1666	11.3957	13.079	2.33324	1.76765	2.35106	ERF15	Ethylene-responsive transcription factor 15 [Source:UniProtKB/Swiss-Prot;Acc:Q8VYM0]	DNA binding|nucleus|transcription, DNA-templated|regulation of transcription, DNA-templated|defense response|transcription factor activity, sequence-specific DNA binding|chloroplast|response to chitin|intracellular|ethylene-activated signaling pathway
AT2G31865	2.44803	2.76852e-39	1.10481e-37	8.84348	8.22955	10.3232	1.58535	1.55279	2.03989	PARG2	Probable poly(ADP-ribose) glycohydrolase 2 [Source:UniProtKB/Swiss-Prot;Acc:Q8VYA1]	poly(ADP-ribose) glycohydrolase activity|nucleus|carbohydrate metabolic process|defense response to fungus|cellular response to DNA damage stimulus
AT2G31880	1.78341	4.93171e-21	9.43835e-20	88.5135	98.5829	114.767	27.795	27.0791	38.0924	SOBIR1	Leucine-rich repeat receptor-like serine/threonine/tyrosine-protein kinase SOBIR1 [Source:UniProtKB/Swiss-Prot;Acc:Q9SKB2]	protein serine/threonine kinase activity|transmembrane receptor protein tyrosine kinase activity|ATP binding|plasma membrane|protein phosphorylation|defense response|transmembrane receptor protein tyrosine kinase signaling pathway|integral component of membrane|kinase activity|positive regulation of cell death|positive regulation of defense response|protein tyrosine kinase activity|negative regul…
AT2G32030	1.51036	1.77304e-13	2.0684e-12	9.13071	11.2956	11.8047	3.60242	3.18676	4.9518		Acyl-CoA N-acyltransferases (NAT) superfamily protein [Source:TAIR;Acc:AT2G32030]	cytoplasm|N-acetyltransferase activity
AT2G32130	Inf	0.0200145	0.0490418	0.459666	0.365031	0.188457	0	0	0		Plant protein of unknown function (DUF641) [Source:TAIR;Acc:AT2G32130]	molecular_function|nucleus|biological_process
AT2G32140	4.39819	5.74147e-45	2.72807e-43	7.56925	8.07598	9.474	0.425545	0.397818	0.36843		transmembrane receptors [Source:TAIR;Acc:AT2G32140]	defense response|signal transduction|chloroplast|integral component of membrane
AT2G32160	2.58574	1.59784e-24	3.69855e-23	3.0134	3.33877	3.54417	0.668076	0.481464	0.481653		S-adenosyl-L-methionine-dependent methyltransferases superfamily protein [Source:TAIR;Acc:AT2G32160]	molecular_function|nucleus|biological_process
AT2G32210	1.89019	3.35297e-16	4.72868e-15	14.5678	18.4128	17.9575	4.93218	3.94886	4.85612		unknown protein; BEST Arabidopsis thaliana protein match is: unknown protein (TAIR:AT2G32190.1); Has 214 Blast hits to 214 proteins in 21 species: Archae - 0; Bacteria - 0; Metazoa - 1; Fungi - 10; Plants - 203; Viruses - 0; Other Eukaryotes - 0 (so /.../NCBI BLink). [Source:TAIR;Acc:AT2G32210]	molecular_function|biological_process
AT2G32400	1.12788	2.465e-15	3.30146e-14	5.77767	5.20875	5.47291	3.2225	2.5433	2.19167	GLR3.7	Glutamate receptor 3.7 [Source:UniProtKB/Swiss-Prot;Acc:Q9SDQ4]
AT2G32487	2.51479	1.19873e-09	9.84584e-09	9.23237	10.9191	7.88761	3.13642	0.428978	1.45616		unknown protein; FUNCTIONS IN: molecular_function unknown; INVOLVED IN: biological_process unknown; LOCATED IN: endomembrane system; Has 1 Blast hits to 1 proteins in 1 species: Archae - 0; Bacteria - 0; Metazoa - 0; Fungi - 0; Plants - 1; Viruses - /.../her Eukaryotes - 0 (source: NCBI BLink). [Source:TAIR;Acc:AT2G32487]	molecular_function|extracellular region|biological_process
AT2G32520	1.16265	1.38242e-28	3.81876e-27	43.5276	42.9101	41.622	20.6478	18.7548	21.831		alpha/beta-Hydrolases superfamily protein [Source:TAIR;Acc:AT2G32520]	cytoplasm|metabolic process|transferase activity, transferring acyl groups other than amino-acyl groups|hydrolase activity|chloroplast|response to zinc ion|cytosol
AT2G32660	1.53577	2.79143e-05	0.000128416	1.30086	2.27318	2.44408	0.538861	1.01332	0.651429	AtRLP22	receptor like protein 22 [Source:TAIR;Acc:AT2G32660]
AT2G32680	7.41168	1.3953e-37	5.34066e-36	4.80145	4.23946	6.41211	0.0594454	0	0.0406256	AtRLP23	receptor like protein 23 [Source:TAIR;Acc:AT2G32680]
AT2G32830	2.74422	0.000863835	0.00299049	0.254197	0.512449	0.60273	0.0730193	0.108798	0.0362148	PHT1-5	Probable inorganic phosphate transporter 1-5 [Source:UniProtKB/Swiss-Prot;Acc:Q8GYF4]
AT2G32960	1.0973	1.03613e-07	6.8447e-07	6.07351	6.5491	7.32299	4.05462	2.58957	2.39375		Phosphotyrosine protein phosphatases superfamily protein [Source:TAIR;Acc:AT2G32960]
AT2G33020	4.01524	1.85281e-24	4.27607e-23	1.81171	1.5663	1.34696	0.168367	0.0980297	0.0742302	AtRLP24	receptor like protein 24 [Source:TAIR;Acc:AT2G33020]
AT2G33080	Inf	0.0296542	0.0690851	0.0851268	0.0834466	0.0579832	0	0	0	AtRLP28	receptor like protein 28 [Source:TAIR;Acc:AT2G33080]
AT2G33175	5.13312	1.59721e-09	1.29442e-08	0.964607	2.05186	1.84624	0	0.137743	0		unknown protein; FUNCTIONS IN: molecular_function unknown; INVOLVED IN: biological_process unknown; LOCATED IN: endomembrane system; Has 10 Blast hits to 10 proteins in 1 species: Archae - 0; Bacteria - 0; Metazoa - 0; Fungi - 0; Plants - 10; Viruse /.../ Other Eukaryotes - 0 (source: NCBI BLink). [Source:TAIR;Acc:AT2G33175]	molecular_function|biological_process
AT2G33380	2.60543	1.10751e-48	5.93673e-47	15.6639	19.189	19.959	3.4676	3.4412	2.59142	PXG3	Probable peroxygenase 3 [Source:UniProtKB/Swiss-Prot;Acc:O22788]
AT2G34020	1.17613	6.34668e-07	3.76573e-06	7.36397	9.65935	9.48896	3.90238	5.50361	3.4015		Calcium-binding EF-hand family protein [Source:TAIR;Acc:AT2G34020]	calcium ion binding|chloroplast|integral component of membrane
AT2G34360	1.79978	0.0217882	0.0528901	0.131598	0.264965	0.366673	0.131562	0.0436717	0		MATE efflux family protein [Source:TAIR;Acc:AT2G34360]	transporter activity|antiporter activity|membrane|integral component of membrane
AT2G34390	Inf	0.00124009	0.0041404	0.0538782	0.376682	0.504511	0	0	0	NIP2-1	Aquaporin NIP2-1 [Source:UniProtKB/Swiss-Prot;Acc:Q8W037]
AT2G34600	2.07167	4.13873e-17	6.25079e-16	10.5161	11.1759	9.0791	1.94607	1.95428	3.21408	TIFY 5B	Protein TIFY 5B [Source:UniProtKB/Swiss-Prot;Acc:O64687]
AT2G34810	1.53445	1.92205e-16	2.75714e-15	23.8846	20.6403	17.8955	8.43907	7.35427	7.11544		FAD-binding Berberine family protein [Source:TAIR;Acc:AT2G34810]	cytoplasm|electron carrier activity|oxidoreductase activity, acting on CH-OH group of donors|flavin adenine dinucleotide binding|oxidation-reduction process|response to wounding|response to jasmonic acid
AT2G34820	Inf	0.0220037	0.0533357	0.146906	0.336085	0.0499172	0	0	0	BHLH53	Transcription factor bHLH53 [Source:UniProtKB/Swiss-Prot;Acc:Q84RD0]	DNA binding|transcription factor activity, sequence-specific DNA binding|nucleus|protein dimerization activity|regulation of transcription, DNA-templated
AT2G34930	3.80301	6.19758e-283	8.5399e-280	58.9972	62.661	64.7825	3.72545	4.3947	6.05172		disease resistance family protein / LRR family protein [Source:TAIR;Acc:AT2G34930]	defense response|signal transduction|cell wall|defense response to fungus
AT2G35290	1.09269	0.00248554	0.00775386	4.21849	3.08191	3.88915	1.54259	1.85063	1.42028		unknown protein; Has 39 Blast hits to 39 proteins in 10 species: Archae - 0; Bacteria - 0; Metazoa - 0; Fungi - 0; Plants - 39; Viruses - 0; Other Eukaryotes - 0 (source: NCBI BLink). [Source:TAIR;Acc:AT2G35290]
AT2G35930	1.03329	7.66071e-11	7.00711e-10	21.5904	23.018	26.474	12.282	9.81825	14.555	PUB23	E3 ubiquitin-protein ligase PUB23 [Source:UniProtKB/Swiss-Prot;Acc:Q84TG3]	cytoplasm|defense response|ligase activity|response to chitin|ubiquitin-protein transferase activity|cytosol|response to water deprivation|protein ubiquitination|respiratory burst involved in defense response|protein autoubiquitination
AT2G36110	Inf	1.47318e-07	9.55139e-07	0.754421	0.872998	0.906895	0	0	0		Polynucleotidyl transferase, ribonuclease H-like superfamily protein [Source:TAIR;Acc:AT2G36110]	nucleic acid binding|intracellular|nucleus|3'-5' exonuclease activity|transferase activity
AT2G36325	5.53721	4.07848e-07	2.48798e-06	0.674665	0.62382	0.745644	0	0	0		GDSL esterase/lipase At2g36325 [Source:UniProtKB/Swiss-Prot;Acc:Q8RWJ4]	extracellular region|lipid catabolic process|hydrolase activity, acting on ester bonds
AT2G36330	1.21556	7.00112e-14	8.42328e-13	15.2453	20.0761	17.0258	8.28106	6.90102	8.41009		CASP-like protein 4A3 [Source:UniProtKB/Swiss-Prot;Acc:Q84WP5]
AT2G36470	1.3949	2.30578e-16	3.28746e-15	7.63494	7.27108	7.86954	3.19913	2.92514	3.04918		Plant protein of unknown function (DUF868) [Source:TAIR;Acc:AT2G36470]	molecular_function|nucleus|biological_process
AT2G36690	1.22895	2.26253e-11	2.16768e-10	13.9729	15.9894	18.2409	5.14804	7.81504	8.57086		2-oxoglutarate (2OG) and Fe(II)-dependent oxygenase superfamily protein [Source:TAIR;Acc:AT2G36690]	cytoplasm|biosynthetic process|oxidoreductase activity, acting on paired donors, with incorporation or reduction of molecular oxygen, 2-oxoglutarate as one donor, and incorporation of one atom each of oxygen into both donors|metal ion binding|oxidation-reduction process
AT2G36770	1.64574	9.80362e-11	8.85994e-10	2.57673	3.08624	2.73438	1.02708	0.925722	0.871903	UGT73C4	UDP-glycosyltransferase 73C4 [Source:UniProtKB/Swiss-Prot;Acc:Q9ZQ97]	UDP-glycosyltransferase activity|chloroplast|transferase activity, transferring glycosyl groups|transferase activity, transferring hexosyl groups
AT2G36780	2.34299	5.40546e-09	4.1353e-08	1.10441	1.23838	1.53231	0.33272	0.339423	0.142066	UGT73C3	UDP-glycosyltransferase 73C3 [Source:UniProtKB/Swiss-Prot;Acc:Q9ZQ96]	UDP-glycosyltransferase activity|chloroplast|transferase activity, transferring glycosyl groups
AT2G36970	1.61606	1.52973e-09	1.24122e-08	5.7797	4.87054	4.06098	2.23373	1.28204	1.56966	UGT86A1	UDP-glycosyltransferase 86A1 [Source:UniProtKB/Swiss-Prot;Acc:Q9SJL0]	UDP-glycosyltransferase activity|transferase activity, transferring glycosyl groups
AT2G36985	2.97955	0.0243931	0.0583546	0.883524	0.228728	2.10073	0	0	0	ROT4	DVL family protein [Source:TAIR;Acc:AT2G36985]	molecular_function|shoot system development|plasma membrane|regulation of cell proliferation
AT2G37110	1.081	2.70536e-33	9.02749e-32	132.449	138.467	135.545	62.948	63.0183	78.3536		PLAC8 family protein [Source:TAIR;Acc:AT2G37110]	molecular_function|cytoplasm|biological_process
AT2G37430	1.41649	4.72033e-05	0.000208394	2.9949	4.25867	3.25874	1.87674	0.988376	1.14788	ZAT11	Zinc finger protein ZAT11 [Source:UniProtKB/Swiss-Prot;Acc:Q9SLD4]	nucleic acid binding|transcription factor activity, sequence-specific DNA binding|nucleus|transcription, DNA-templated|zinc ion binding|sequence-specific DNA binding|transcription regulatory region DNA binding|metal ion binding|regulation of transcription, DNA-templated|response to chitin|cellular response to nickel ion|regulation of root development
AT2G37710	1.59876	4.87967e-52	2.91597e-50	45.4075	46.6597	51.6599	19.7561	15.2868	15.69	LECRK41	L-type lectin-domain containing receptor kinase IV.1 [Source:UniProtKB/Swiss-Prot;Acc:O80939]
AT2G37760	1.37562	1.95151e-23	4.24458e-22	31.8432	38.0215	41.4746	15.1549	14.8488	14.791	AKR4C8	Aldo-keto reductase family 4 member C8 [Source:UniProtKB/Swiss-Prot;Acc:O80944]	cytoplasm|response to toxic substance|response to cadmium ion|aldo-keto reductase (NADP) activity|response to cold|response to water deprivation|response to salt stress|steroid dehydrogenase activity|oxidation-reduction process|NADP+ binding|cytosol
AT2G37770	3.94164	5.53012e-22	1.12061e-20	3.01244	4.03784	5.29872	0.508092	0.128693	0.215763	AKR4C9	Aldo-keto reductase family 4 member C9 [Source:UniProtKB/Swiss-Prot;Acc:Q0PGJ6]
AT2G38240	7.569	1.10187e-99	1.79245e-97	8.32445	8.00082	7.89479	0.035901	0.10898	0		2-oxoglutarate (2OG) and Fe(II)-dependent oxygenase superfamily protein [Source:TAIR;Acc:AT2G38240]	cytoplasm|metal ion binding|oxidation-reduction process
AT2G38250	1.39683	0.000338172	0.00127584	2.3983	2.39187	3.80713	1.03625	1.53287	1.38088	GT-3B	Trihelix transcription factor GT-3b [Source:UniProtKB/Swiss-Prot;Acc:O80450]	nucleus|transcription, DNA-templated|sequence-specific DNA binding|transcription factor activity, sequence-specific DNA binding|regulation of transcription, DNA-templated|protein binding|nucleolus|mediator complex
AT2G38290	2.69261	9.94199e-60	7.188e-58	29.9555	29.0611	35.4954	5.69761	5.07672	5.15504	AMT2	Ammonium transporter 2 [Source:UniProtKB/Swiss-Prot;Acc:Q9M6N7]	cytoplasm|integral component of plasma membrane|ammonium transmembrane transporter activity|organic cation transport|nitrogen utilization|ammonium transmembrane transport|plasma membrane|high-affinity secondary active ammonium transmembrane transporter activity|ammonium transport|response to nematode|plasmodesma
AT2G38530	2.94788	2.95115e-254	2.76523e-251	2950.85	3256.27	3186.23	274.049	490.651	517.299	LTP2	Non-specific lipid-transfer protein 2 [Source:UniProtKB/Swiss-Prot;Acc:Q9S7I3]	extracellular region|lipid binding|phospholipid transfer to membrane|plasma membrane|programmed cell death|response to water deprivation|endosome|Golgi apparatus|trans-Golgi network
AT2G38860	2.49035	8.42092e-38	3.24441e-36	60.5021	68.1894	76.9507	15.673	10.9129	11.9961	DJ1E	DJ-1 protein homolog E [Source:UniProtKB/Swiss-Prot;Acc:Q9ZV19]
AT2G38870	2.31943	9.81185e-92	1.36811e-89	86.5223	88.8672	93.4768	18.6879	16.482	23.1889		Serine protease inhibitor, potato inhibitor I-type family protein [Source:TAIR;Acc:AT2G38870]	serine-type endopeptidase inhibitor activity|extracellular region|proteolysis|peptidase activity|response to wounding|cell wall|defense response to fungus
AT2G38940	1.13931	6.1034e-26	1.49552e-24	27.4641	30.2437	29.8269	15.0947	12.0458	15.1198	PHT1-4	Inorganic phosphate transporter 1-4 [Source:UniProtKB/Swiss-Prot;Acc:Q96303]
AT2G38960	1.00774	2.73106e-13	3.1299e-12	5.45738	7.15988	7.4998	3.40903	3.36581	3.49326	AERO2	Endoplasmic reticulum oxidoreductin-2 [Source:UniProtKB/Swiss-Prot;Acc:Q7X9I4]
AT2G39030	Inf	1.21845e-256	1.18926e-253	84.4911	78.5891	92.623	0	0	0	NATA1	L-ornithine N5-acetyltransferase NATA1 [Source:UniProtKB/Swiss-Prot;Acc:Q9ZV05]	cytoplasm|defense response|N-acetyltransferase activity|ornithine metabolic process|response to jasmonic acid
AT2G39200	2.02447	2.29759e-15	3.0843e-14	18.7366	23.3432	27.2719	5.7701	5.60177	6.53109	MLO12	MLO-like protein 12 [Source:UniProtKB/Swiss-Prot;Acc:O80961]	calmodulin binding|plasma membrane|defense response|cell death|integral component of membrane|defense response to fungus, incompatible interaction|leaf senescence
AT2G39210	2.1618	2.00662e-36	7.32167e-35	100.88	113.332	128.241	24.5308	26.6782	29.9078		Major facilitator superfamily protein [Source:TAIR;Acc:AT2G39210]	molecular_function|chloroplast|integral component of membrane|transmembrane transport|plasmodesma|defense response to fungus
AT2G39320	Inf	0.0200145	0.0490418	0.371427	0.306133	0.155754	0	0	0		Cysteine proteinases superfamily protein [Source:TAIR;Acc:AT2G39320]	cytoplasm|proteolysis|cysteine-type peptidase activity
AT2G39330	Inf	1.54961e-44	7.24544e-43	20.3367	15.0335	12.7313	0	0	0	JAL23	Jacalin-related lectin 23 [Source:UniProtKB/Swiss-Prot;Acc:O80948]	cytoplasm|carbohydrate binding|vacuole|plasmodesma
AT2G39420	1.05118	3.81862e-22	7.78513e-21	28.1331	31.7263	28.4595	16.1146	13.8476	14.0845		alpha/beta-Hydrolases superfamily protein [Source:TAIR;Acc:AT2G39420]
AT2G39518	2.03969	6.02224e-22	1.21613e-20	35.701	41.793	47.2606	10.881	8.50599	12.6511		CASP-like protein 4D2 [Source:UniProtKB/Swiss-Prot;Acc:Q56X75]
AT2G39530	1.23907	4.7554e-08	3.26577e-07	9.93196	12.0574	16.0204	6.06201	5.56706	5.59034		CASP-like protein 4D1 [Source:UniProtKB/Swiss-Prot;Acc:Q8GWD5]
AT2G39660	1.33253	2.36011e-21	4.6033e-20	28.4177	32.7994	35.6227	13.5063	12.7516	14.5474	BIK1	Serine/threonine-protein kinase BIK1 [Source:UniProtKB/Swiss-Prot;Acc:O48814]	protein serine/threonine kinase activity|ATP binding|chloroplast|kinase activity|nucleus|nucleolus|cytoplasm|plasma membrane|response to fungus|protein autophosphorylation|defense response to fungus|pathogen-associated molecular pattern dependent induction by symbiont of host innate immune response
AT2G39920	1.46869	0.0268101	0.063437	0.38583	0.865485	0.300109	0.0474695	0.192117	0.338802		Uncharacterized protein At2g39920 [Source:UniProtKB/Swiss-Prot;Acc:O04195]	acid phosphatase activity|integral component of membrane|response to cadmium ion
AT2G40200	1.59454	0.000195151	0.000770638	2.13275	1.3823	1.64447	0.938023	0.542343	0.278675	BHLH51	Transcription factor bHLH51 [Source:UniProtKB/Swiss-Prot;Acc:Q9XEF0]	DNA binding|nucleus|transcription, DNA-templated|protein dimerization activity|transcription factor activity, sequence-specific DNA binding|regulation of transcription, DNA-templated
AT2G40340	1.35354	0.0220633	0.0534637	0.358045	0.388231	0.708795	0.161029	0.195121	0.130434	DREB2C	Dehydration-responsive element-binding protein 2C [Source:UniProtKB/Swiss-Prot;Acc:Q8LFR2]	DNA binding|transcription factor activity, sequence-specific DNA binding|nucleus|transcription, DNA-templated|regulation of transcription, DNA-templated|abscisic acid-activated signaling pathway|sequence-specific DNA binding|transcription regulatory region DNA binding|positive regulation of transcription, DNA-templated|heat acclimation|protein binding|response to abscisic acid
AT2G40435	2.08826	0.00959525	0.0258669	0.43768	0.61369	0.458813	0	0.162771	0.222093		BEST Arabidopsis thaliana protein match is: transcription regulators (TAIR:AT3G56220.1); Has 289 Blast hits to 289 proteins in 30 species: Archae - 0; Bacteria - 0; Metazoa - 0; Fungi - 0; Plants - 289; Viruses - 0; Other Eukaryotes - 0 (source: NCB /.../k). [Source:TAIR;Acc:AT2G40435]	nucleus
AT2G40750	Inf	1.21882e-63	9.74435e-62	6.19839	5.44124	7.66134	0	0	0	WRKY54	Probable WRKY transcription factor 54 [Source:UniProtKB/Swiss-Prot;Acc:Q93WU8]	transcription factor activity, sequence-specific DNA binding|nucleus|transcription, DNA-templated|regulation of transcription, DNA-templated|sequence-specific DNA binding|regulation of defense response|protein binding|response to salicylic acid|negative regulation of leaf senescence
AT2G41090	3.28081	9.17135e-91	1.24906e-88	499.458	528.251	605.756	64.9559	48.5325	62.7686	CML10	Calmodulin-like protein 10 [Source:UniProtKB/Swiss-Prot;Acc:P30187]	calcium ion binding|plasma membrane|protein binding|cytoplasm|cellular response to oxidative stress|regulation of L-ascorbic acid biosynthetic process
AT2G41100	1.72462	3.85313e-28	1.04467e-26	462.826	469.357	541.647	123.918	139.676	202.956	CML12	Calmodulin-like protein 12 [Source:UniProtKB/Swiss-Prot;Acc:P25071]
AT2G41180	2.26444	2.74791e-41	1.18983e-39	36.6803	30.1218	31.9275	5.31518	7.22969	8.35196	SIB2	Sigma factor binding protein 2, chloroplastic [Source:UniProtKB/Swiss-Prot;Acc:O80669]	nucleus|protein binding|positive regulation of sequence-specific DNA binding transcription factor activity
AT2G41230	1.41528	9.49379e-07	5.52664e-06	29.5967	37.5386	44.3951	12.4841	12.0704	19.9542	ORS1	Protein ORGAN SIZE RELATED 1 [Source:UniProtKB/Swiss-Prot;Acc:Q8RWS1]
AT2G41260	2.8365	0.00188755	0.00604371	0.517851	0.642026	1.16381	0.0766613	0.18587	0.111367	M17	glycine-rich protein / late embryogenesis abundant protein (M17) [Source:TAIR;Acc:AT2G41260]	molecular_function|extracellular region|embryo development ending in seed dormancy|vacuole
AT2G41810	2.12755	4.40961e-05	0.000195598	2.56718	5.32669	4.08513	0.908663	1.0758	1.09484		Protein of unknown function, DUF642 [Source:TAIR;Acc:AT2G41810]	molecular_function|extracellular region|biological_process
AT2G41835	1.03282	1.72753e-10	1.52592e-09	9.17981	8.86899	10.4165	4.61961	4.70506	5.32276	SAP11	Zinc finger AN1 and C2H2 domain-containing stress-associated protein 11 [Source:UniProtKB/Swiss-Prot;Acc:Q8VZ42]	nucleic acid binding|nucleus|biological_process|zinc ion binding
AT2G42360	4.67514	3.23292e-52	1.93686e-50	15.9243	19.2019	21.172	0.549706	0.913939	0.863921	ATL41	E3 ubiquitin-protein ligase ATL41 [Source:UniProtKB/Swiss-Prot;Acc:Q9SLC3]	nucleus|zinc ion binding|integral component of membrane|protein ubiquitination|ligase activity|ubiquitin-protein transferase activity
AT2G42610	1.98749	6.16806e-24	1.38265e-22	14.7499	12.0066	11.8862	2.82249	3.54848	3.78004	LSH10	Protein LIGHT-DEPENDENT SHORT HYPOCOTYLS 10 [Source:UniProtKB/Swiss-Prot;Acc:Q9S7R3]	DNA binding|nucleus|regulation of transcription, DNA-templated
AT2G43000	2.49563	3.60702e-09	2.8146e-08	3.86519	2.44502	3.78936	0.924813	0.488441	0.436525	JUB1	Transcription factor JUNGBRUNNEN 1 [Source:UniProtKB/Swiss-Prot;Acc:Q9SK55]
AT2G43100	2.23517	1.24372e-25	3.00351e-24	66.7132	55.2394	55.7357	19.2883	8.03098	13.0565	IPMI2	3-isopropylmalate dehydratase small subunit 1 [Source:UniProtKB/Swiss-Prot;Acc:Q9ZW84]	leucine biosynthetic process|chloroplast|hydro-lyase activity|plastid|3-isopropylmalate dehydratase activity|chloroplast stroma|glucosinolate biosynthetic process
AT2G43140	2.45097	1.73392e-98	2.78199e-96	21.6574	18.383	17.569	2.59716	3.95736	3.88039	BHLH129	Transcription factor bHLH129 [Source:UniProtKB/Swiss-Prot;Acc:Q9ZW81]
AT2G43350	1.14093	5.27482e-24	1.18925e-22	30.6826	32.9824	34.2834	14.9065	15.8296	15.8231	GPX3	Probable glutathione peroxidase 3, mitochondrial [Source:UniProtKB/Swiss-Prot;Acc:O22850]	glutathione peroxidase activity|cytoplasm|oxidation-reduction process|mitochondrion|abscisic acid-activated signaling pathway|response to hydrogen peroxide|cellular response to water deprivation|endosome|Golgi apparatus|trans-Golgi network
AT2G43510	3.46679	1.39165e-199	6.51989e-197	237.949	252.715	239.832	25.2343	23.5345	22.5985	ATTI1	Defensin-like protein 195 [Source:UniProtKB/Swiss-Prot;Acc:Q42328]
AT2G43520	1.1621	2.15298e-11	2.06356e-10	23.8026	20.8354	23.6573	12.2459	10.0994	8.24818	ATTI2	Defensin-like protein 193 [Source:UniProtKB/Swiss-Prot;Acc:O22866]
AT2G43530	4.75122	2.46995e-152	7.14304e-150	322.361	293.198	273.087	10.4528	12.3344	11.5881	ATTI3	Scorpion toxin-like knottin superfamily protein [Source:TAIR;Acc:AT2G43530]	extracellular region
AT2G43550	1.01644	6.13483e-07	3.65205e-06	31.7205	26.9412	23.2817	15.7884	15.5786	12.7481	ATTI6	Scorpion toxin-like knottin superfamily protein [Source:TAIR;Acc:AT2G43550]	extracellular region
AT2G43570	1.85044	3.42648e-30	1.00963e-28	15.1485	13.9663	15.7046	3.76869	3.99029	5.37578	CHI	chitinase, putative [Source:TAIR;Acc:AT2G43570]	polysaccharide catabolic process|chitinase activity|extracellular region|chitin catabolic process|chitin binding|cell wall macromolecule catabolic process|response to virus|leaf senescence|response to silver ion|response to amitrole|plant-type cell wall|apoplast|systemic acquired resistance
AT2G43580	4.23885	4.58594e-24	1.03994e-22	4.16886	3.48866	3.31242	0.378679	0.108398	0.164269		Chitinase family protein [Source:TAIR;Acc:AT2G43580]	polysaccharide catabolic process|chitinase activity|extracellular region|chitin catabolic process|defense response|chitin binding|cell wall macromolecule catabolic process|response to fungus
AT2G43590	2.63135	7.02782e-114	1.3494e-111	182.652	190.517	207.032	33.0208	28.3949	39.9062		Chitinase family protein [Source:TAIR;Acc:AT2G43590]	polysaccharide catabolic process|chitinase activity|extracellular region|chitin catabolic process|defense response|chitin binding|cell wall macromolecule catabolic process
AT2G43620	5.05458	7.42739e-48	3.84926e-46	58.3915	71.4971	86.8194	3.05871	1.74729	2.52632		Chitinase family protein [Source:TAIR;Acc:AT2G43620]	polysaccharide catabolic process|chitinase activity|extracellular region|chitin catabolic process|defense response|chitin binding|cell wall macromolecule catabolic process|apoplast
AT2G43820	1.25861	3.63271e-45	1.74377e-43	103.851	108.047	108.54	45.1367	50.2067	46.5804	UGT74F2	UDP-glycosyltransferase 74F2 [Source:UniProtKB/Swiss-Prot;Acc:O22822]	cytoplasm|UDP-glycosyltransferase activity|flavonoid biosynthetic process|transferase activity, transferring glycosyl groups|transferase activity, transferring hexosyl groups|intracellular membrane-bounded organelle|flavonoid glucuronidation|quercetin 3-O-glucosyltransferase activity|quercetin 7-O-glucosyltransferase activity|benzoate metabolic process|UDP-glucosyltransferase activity|salicylic a…
AT2G44070	3.35251	1.48993e-23	3.26182e-22	3.89452	3.49373	2.98654	0.243275	0.729716	0.426691		NagB/RpiA/CoA transferase-like superfamily protein [Source:TAIR;Acc:AT2G44070]	translation initiation factor activity|guanyl-nucleotide exchange factor activity|GTP binding|eukaryotic translation initiation factor 2B complex|translational initiation|transferase activity|negative regulation of translational initiation|regulation of catalytic activity
AT2G44180	1.05547	9.78195e-24	2.1658e-22	23.4571	24.413	25.9772	13.2884	12.1118	11.2408	MAP2A	Methionine aminopeptidase 2A [Source:UniProtKB/Swiss-Prot;Acc:Q9FV49]	cytoplasm|proteolysis|metal ion binding|metalloaminopeptidase activity|protein initiator methionine removal|N-terminal protein amino acid modification
AT2G44290	1.73959	7.45649e-15	9.64486e-14	41.0149	40.8861	53.1875	13.7984	11.5389	14.6719	YLS3	Protein YLS3 [Source:UniProtKB/Swiss-Prot;Acc:O64864]	plasma membrane|lipid transport|lipid binding|anchored component of membrane
AT2G44370	2.92177	4.24747e-14	5.20654e-13	5.13666	7.30618	8.55942	0.854089	0.977466	1.03469		Cysteine/Histidine-rich C1 domain family protein [Source:TAIR;Acc:AT2G44370]	nucleus
AT2G44578	1.86774	0.0140754	0.036169	1.1642	1.28113	0.804318	0.294709	0.194149	0.494215		RING/U-box superfamily protein [Source:TAIR;Acc:AT2G44578]	biological_process|zinc ion binding|integral component of membrane
AT2G44840	3.40453	1.29584e-65	1.08025e-63	15.0621	15.1937	16.6724	0.988161	1.15277	2.63557	ERF13	Ethylene-responsive transcription factor 13 [Source:UniProtKB/Swiss-Prot;Acc:Q8L9K1]	DNA binding|transcription factor activity, sequence-specific DNA binding|nucleus|transcription, DNA-templated|regulation of transcription, DNA-templated|defense response|response to chitin|intracellular|ethylene-activated signaling pathway
AT2G45360	2.55572	0.00304151	0.00928546	0.277919	1.06729	1.03239	0.056693	0.166811	0.225048		Protein of unknown function (DUF1442) [Source:TAIR;Acc:AT2G45360]	molecular_function|nucleus|biological_process
AT2G45550	Inf	0.0294374	0.0687028	0.156772	0.0313946	0.0651762	0	0	0	CYP76C4	Cytochrome P450 76C4 [Source:UniProtKB/Swiss-Prot;Acc:O64635]	iron ion binding|membrane|integral component of membrane|oxidoreductase activity, acting on paired donors, with incorporation or reduction of molecular oxygen, NAD(P)H as one donor, and incorporation of one atom of oxygen|oxygen binding|heme binding|secondary metabolite biosynthetic process|oxidation-reduction process
AT2G45570	3.3914	1.926e-07	1.23404e-06	0.554082	0.550914	0.598148	0.0544058	0.0824636	0.0556503	CYP76C2	Cytochrome P450 76C2 [Source:UniProtKB/Swiss-Prot;Acc:O64637]	iron ion binding|extracellular region|membrane|integral component of membrane|oxidoreductase activity, acting on paired donors, with incorporation or reduction of molecular oxygen, NAD(P)H as one donor, and incorporation of one atom of oxygen|oxygen binding|heme binding|secondary metabolite biosynthetic process|oxidation-reduction process
AT2G45760	4.2212	3.17238e-22	6.50157e-21	3.32154	4.11706	5.29596	0.183285	0.371432	0.186798	BAP2	BON1-associated protein 2 [Source:UniProtKB/Swiss-Prot;Acc:Q58FX0]	molecular_function|defense response|membrane
AT2G46150	1.27124	7.84939e-07	4.61295e-06	3.63851	3.73662	4.1535	1.58497	1.71345	1.58978		Late embryogenesis abundant (LEA) hydroxyproline-rich glycoprotein family [Source:TAIR;Acc:AT2G46150]	molecular_function|biological_process|integral component of membrane|plasma membrane
AT2G46400	5.36945	1.40371e-129	3.38989e-127	50.2066	50.7307	60.3483	1.29241	0.684907	2.12186	WRKY46	Probable WRKY transcription factor 46 [Source:UniProtKB/Swiss-Prot;Acc:Q9SKD9]	transcription factor activity, sequence-specific DNA binding|nucleus|transcription, DNA-templated|regulation of transcription, DNA-templated|nucleolus|response to chitin|transcription regulatory region DNA binding|core promoter proximal region sequence-specific DNA binding|sequence-specific DNA binding|lateral root development
AT2G46430	2.88386	6.21604e-56	4.18422e-54	12.8728	12.1849	15.0931	2.18456	1.80021	1.60057	CNGC3	Probable cyclic nucleotide-gated ion channel 3 [Source:UniProtKB/Swiss-Prot;Acc:Q9SKD7]	ion channel activity|voltage-gated potassium channel activity|calmodulin binding|plasma membrane|integral component of plasma membrane|cyclic nucleotide binding|cAMP binding|cGMP binding|regulation of membrane potential
AT2G46440	5.81349	2.82569e-146	7.69673e-144	8.95342	7.90862	9.30261	0.209207	0.0428193	0.107583	CNGC11	Cyclic nucleotide-gated ion channel 11 [Source:UniProtKB/Swiss-Prot;Acc:Q9SKD6]	ion channel activity|voltage-gated potassium channel activity|calmodulin binding|plasma membrane|integral component of plasma membrane|cyclic nucleotide binding|cAMP binding|cGMP binding|regulation of membrane potential|defense response|cation channel activity|response to bacterium|response to fungus
AT2G46450	1.17603	1.23597e-28	3.42633e-27	12.3016	13.4627	12.3761	6.39871	6.32879	4.89687	CNGC12	Probable cyclic nucleotide-gated ion channel 12 [Source:UniProtKB/Swiss-Prot;Acc:Q8GWD2]	ion channel activity|voltage-gated potassium channel activity|calmodulin binding|plasma membrane|integral component of plasma membrane|integral component of membrane|cyclic nucleotide binding|cAMP binding|cGMP binding|regulation of membrane potential|defense response|cation channel activity|response to bacterium|response to fungus
AT2G46510	1.45531	2.11012e-39	8.49306e-38	16.9339	18.9015	19.1094	7.59725	6.58343	7.16729	AIB	Transcription factor ABA-INDUCIBLE bHLH-TYPE [Source:UniProtKB/Swiss-Prot;Acc:Q9ZPY8]	DNA binding|transcription factor activity, sequence-specific DNA binding|nucleus|transcription, DNA-templated|abscisic acid-activated signaling pathway|protein dimerization activity|regulation of transcription, DNA-templated|response to wounding|response to abscisic acid
AT2G46650	2.32902	5.18078e-28	1.39174e-26	80.2058	69.7361	64.6449	22.1624	9.07411	14.5881	CYTB5-C	Cytochrome B5 isoform C [Source:UniProtKB/Swiss-Prot;Acc:Q9ZNV4]
AT2G46750	1.25868	7.0763e-07	4.17327e-06	17.8031	23.9836	27.5628	11.3501	7.99235	11.4638	GULLO2	L-gulonolactone oxidase 2 [Source:UniProtKB/Swiss-Prot;Acc:Q6NQ66]
AT2G46770	Inf	0.0293743	0.0685693	0.0663114	0.0998687	0.170497	0	0	0	NAC043	NAC domain-containing protein 43 [Source:UniProtKB/Swiss-Prot;Acc:Q84WP6]
AT2G47010	1.07921	3.97063e-17	6.00464e-16	9.57215	11.0246	11.5468	6.01361	4.89583	4.98022		unknown protein; FUNCTIONS IN: molecular_function unknown; INVOLVED IN: biological_process unknown; LOCATED IN: endomembrane system; EXPRESSED IN: 17 plant structures; EXPRESSED DURING: 10 growth stages; BEST Arabidopsis thaliana protein match is: u /.../ protein (TAIR:AT1G17030.1); Has 72 Blast hits to 72 proteins in 13 species: Archae - 0; Bacteria - 0; Metazoa - 0; Fungi - 0; Plants - 71; Viru…	molecular_function|biological_process
AT2G47130	1.74371	9.37702e-27	2.37981e-25	22.7583	24.9333	28.0695	7.93893	6.73382	8.79804	SDR3A	Short-chain dehydrogenase reductase 3a [Source:UniProtKB/Swiss-Prot;Acc:O80713]
AT2G48090	1.23397	7.74645e-06	3.92093e-05	5.69939	5.43896	4.60311	2.76377	2.49763	1.91314		unknown protein; FUNCTIONS IN: molecular_function unknown; INVOLVED IN: biological_process unknown; LOCATED IN: chloroplast; EXPRESSED IN: male gametophyte, root, flower, carpel; EXPRESSED DURING: 4 anthesis, petal differentiation and expansion stag /.../ 3 Blast hits to 3 proteins in 1 species: Archae - 0; Bacteria - 0; Metazoa - 0; Fungi - 0; Plants - 3; Viruses - 0; Other Eukaryotes - 0 (sourc…	molecular_function|nucleus|biological_process
AT3G01290	1.41449	3.90696e-28	1.05682e-26	184.464	196.009	218.867	74.9362	67.2569	94.1346	HIR3	Hypersensitive-induced response protein 3 [Source:UniProtKB/Swiss-Prot;Acc:Q9SRH6]
AT3G01830	5.34103	2.33245e-62	1.80322e-60	7.45783	8.4618	8.3058	0.0965352	0.246794	0.299757	CML40	Probable calcium-binding protein CML40 [Source:UniProtKB/Swiss-Prot;Acc:Q9SGI8]	calcium ion binding|nucleus|biological_process
AT3G01900	1.65093	1.71234e-05	8.17269e-05	1.26008	1.38287	0.726483	0.286491	0.353168	0.52258	CYP94B2	cytochrome P450, family 94, subfamily B, polypeptide 2 [Source:TAIR;Acc:AT3G01900]	monooxygenase activity|iron ion binding|extracellular region|oxidoreductase activity, acting on paired donors, with incorporation or reduction of molecular oxygen|oxygen binding|heme binding|oxidation-reduction process
AT3G01970	1.78971	4.91002e-42	2.16198e-40	23.922	28.1527	26.132	7.64778	6.57082	9.57386	WRKY45	Probable WRKY transcription factor 45 [Source:UniProtKB/Swiss-Prot;Acc:Q9S763]	transcription factor activity, sequence-specific DNA binding|nucleus|transcription, DNA-templated|regulation of transcription, DNA-templated|sequence-specific DNA binding|transcription regulatory region DNA binding|phosphate ion transport|transcription factor binding
AT3G02020	2.62397	1.2544e-105	2.19285e-103	21.1739	19.9973	20.1815	4.58007	2.36824	3.61596	AK3	Aspartokinase 3, chloroplastic [Source:UniProtKB/Swiss-Prot;Acc:Q9S702]	aspartate kinase activity|ATP binding|threonine biosynthetic process|lysine biosynthetic process via diaminopimelate|chloroplast|phosphorylation|amino acid binding|aspartate family amino acid biosynthetic process
AT3G02040	1.21324	2.31464e-12	2.43907e-11	45.7361	43.6871	35.4224	16.7811	20.7205	19.1818	GDPD1	Glycerophosphodiester phosphodiesterase GDPD1, chloroplastic [Source:UniProtKB/Swiss-Prot;Acc:Q9SGA2]
AT3G02150	1.40402	4.96637e-33	1.63625e-31	23.4021	22.4226	22.4883	9.11259	9.46698	8.11224	TCP13	Transcription factor TCP13 [Source:UniProtKB/Swiss-Prot;Acc:Q9S7W5]
AT3G02550	2.77092	4.84555e-116	9.45891e-114	38.4069	42.0664	40.9346	3.90038	7.77181	7.57611	LBD41	LOB domain-containing protein 41 [Source:UniProtKB/Swiss-Prot;Acc:Q9M886]	nucleus|regulation of transcription, DNA-templated
AT3G02620	3.49628	1.55205e-19	2.71724e-18	5.29718	8.34931	6.63465	0.549622	0.875455	0.524986	S-ACP-DES4	Acyl-[acyl-carrier-protein] desaturase 4, chloroplastic [Source:UniProtKB/Swiss-Prot;Acc:Q9M880]	fatty acid biosynthetic process|chloroplast|acyl-[acyl-carrier-protein] desaturase activity|metal ion binding|oxidation-reduction process
AT3G02770	1.50589	4.52924e-44	2.09265e-42	68.9375	74.9808	78.5865	27.5919	26.3312	28.3142		Putative 4-hydroxy-4-methyl-2-oxoglutarate aldolase 1 [Source:UniProtKB/Swiss-Prot;Acc:Q9M8R9]	cytoplasm|ribonuclease inhibitor activity|oxaloacetate decarboxylase activity|metal ion binding|4-hydroxy-4-methyl-2-oxoglutarate aldolase activity|regulation of RNA metabolic process
AT3G02800	1.18145	2.90347e-08	2.04861e-07	5.36665	4.67664	6.11208	2.2198	3.1373	2.20778		Tyrosine phosphatase family protein [Source:TAIR;Acc:AT3G02800]
AT3G02840	4.2141	3.82702e-35	1.34606e-33	4.8034	6.64831	6.7163	0.315954	0.242406	0.53024		ARM repeat superfamily protein [Source:TAIR;Acc:AT3G02840]	cytoplasm|response to other organism|response to ozone|nucleus
AT3G02875	1.05999	1.99907e-15	2.69592e-14	10.8132	13.0048	12.3804	5.64218	6.27328	6.77161	ILR1	IAA-amino acid hydrolase ILR1 [Source:UniProtKB/Swiss-Prot;Acc:P54968]	proteolysis|metallopeptidase activity|chloroplast|IAA-Phe conjugate hydrolase activity|IAA-Leu conjugate hydrolase activity|endoplasmic reticulum|auxin metabolic process
AT3G02885	2.09689	0.000143645	0.000581152	2.07699	3.07361	2.00927	0.374553	0.639626	0.516167	GASA5	Gibberellin-regulated protein 5 [Source:UniProtKB/Swiss-Prot;Acc:Q84J95]	extracellular region|proteinaceous extracellular matrix|cell wall|response to gibberellin|gibberellic acid mediated signaling pathway|plasmodesma|response to heat|response to salicylic acid|heat acclimation
AT3G03020	1.11854	5.3461e-15	6.99231e-14	17.7511	20.7423	20.7388	7.39442	9.96953	11.2448		unknown protein; FUNCTIONS IN: molecular_function unknown; INVOLVED IN: biological_process unknown; LOCATED IN: chloroplast; EXPRESSED IN: 21 plant structures; EXPRESSED DURING: 13 growth stages; Has 5 Blast hits to 5 proteins in 1 species: Archae - /.../cteria - 0; Metazoa - 0; Fungi - 0; Plants - 5; Viruses - 0; Other Eukaryotes - 0 (source: NCBI BLink). [Source:TAIR;Acc:AT3G03020]	molecular_function|mitochondrion|biological_process
AT3G03190	2.81858	6.22532e-29	1.75064e-27	8.81568	9.23494	8.49985	2.22859	0.858776	1.2217	GSTF11	Glutathione S-transferase F11 [Source:UniProtKB/Swiss-Prot;Acc:Q96324]	glutathione transferase activity|cytoplasm|cytosol|glutathione metabolic process|response to toxic substance|toxin catabolic process|response to oxidative stress
AT3G03560	1.24118	7.46712e-30	2.1774e-28	15.4991	16.7788	17.5582	8.71827	7.26176	6.67132		unknown protein; LOCATED IN: plasma membrane; EXPRESSED IN: 22 plant structures; EXPRESSED DURING: 13 growth stages; BEST Arabidopsis thaliana protein match is: unknown protein (TAIR:AT5G23490.1); Has 157 Blast hits to 146 proteins in 38 species: Ar /.../ 3; Bacteria - 14; Metazoa - 8; Fungi - 0; Plants - 120; Viruses - 0; Other Eukaryotes - 12 (source: NCBI BLink). [Source:TAIR;Acc:AT3G03560]	nucleus|plasma membrane
AT3G03640	1.05148	5.31396e-24	1.19692e-22	26.9125	29.7621	31.7215	14.3053	14.907	16.2776	BGLU25	Probable inactive beta-glucosidase 25 [Source:UniProtKB/Swiss-Prot;Acc:O82772]	hydrolase activity, hydrolyzing O-glycosyl compounds|extracellular region|carbohydrate metabolic process|beta-glucosidase activity|response to salt stress|response to hormone|glucosinolate catabolic process|endoplasmic reticulum
AT3G03670	Inf	1.72715e-07	1.11089e-06	0.561936	0.824654	1.4257	0	0	0	PER28	Peroxidase 28 [Source:UniProtKB/Swiss-Prot;Acc:Q9SS67]	peroxidase activity|extracellular region|response to oxidative stress|heme binding|hydrogen peroxide catabolic process|metal ion binding|oxidation-reduction process|plant-type cell wall|cellular response to hypoxia
AT3G03910	1.84768	0.00366099	0.0109848	0.519933	0.214809	0.540433	0.0301561	0.121862	0.153888	GSH3	Probable glutamate dehydrogenase 3 [Source:UniProtKB/Swiss-Prot;Acc:Q9S7A0]
AT3G03980	1.0418	3.55485e-13	4.04825e-12	18.0657	17.476	17.8856	10.0591	7.98458	9.73139		NAD(P)-binding Rossmann-fold superfamily protein [Source:TAIR;Acc:AT3G03980]	chloroplast|oxidoreductase activity|oxidation-reduction process
AT3G04000	1.68158	6.00683e-21	1.14028e-19	9.49339	10.6144	11.7631	3.58892	3.76528	3.41693		NAD(P)-binding Rossmann-fold superfamily protein [Source:TAIR;Acc:AT3G04000]	oxidoreductase activity|alcohol dehydrogenase (NADP+) activity|chloroplast|oxidation-reduction process|protein binding
AT3G04110	1.10735	1.56132e-18	2.57382e-17	9.31632	9.4487	10.0944	5.79508	3.89707	4.33851	GLR1.1	Glutamate receptor 1.1 [Source:UniProtKB/Swiss-Prot;Acc:Q9M8W7]	ionotropic glutamate receptor activity|intracellular ligand-gated ion channel activity|abscisic acid-activated signaling pathway|integral component of membrane|cellular calcium ion homeostasis|response to abscisic acid|cation channel activity|calcium channel activity|potassium channel activity|sodium channel activity|potassium ion transport|sodium ion transport|calcium ion transport|cellular cati…
AT3G04181	1.46295	0.0322704	0.0742423	1.94382	1.92303	3.38764	1.35239	0	0.571954		unknown protein; FUNCTIONS IN: molecular_function unknown; INVOLVED IN: biological_process unknown; LOCATED IN: cellular_component unknown; Has 30201 Blast hits to 17322 proteins in 780 species: Archae - 12; Bacteria - 1396; Metazoa - 17338; Fungi - /.../ Plants - 5037; Viruses - 0; Other Eukaryotes - 2996 (source: NCBI BLink). [Source:TAIR;Acc:AT3G04181]	molecular_function|cellular_component|biological_process
AT3G04210	2.53157	5.54334e-100	9.08061e-98	24.1315	24.1809	25.8014	5.19319	3.31634	4.7544		Disease resistance protein (TIR-NBS class) [Source:TAIR;Acc:AT3G04210]	cytoplasm|defense response|signal transduction|integral component of membrane|ADP binding
AT3G04220	4.7024	7.70293e-21	1.45283e-19	2.15894	2.45617	3.51527	0.0899929	0.183566	0.0184448		Disease resistance protein (TIR-NBS-LRR class) family [Source:TAIR;Acc:AT3G04220]	ATP binding|defense response|signal transduction|integral component of membrane|ADP binding
AT3G04300	2.69596	1.64526e-39	6.65634e-38	17.8919	18.761	19.0853	3.74263	1.80073	3.10643		RmlC-like cupins superfamily protein [Source:TAIR;Acc:AT3G04300]	molecular_function|biological_process|chloroplast
AT3G04720	3.81099	1.00622e-131	2.50753e-129	1077.37	1247.17	1319.99	82.9777	78.9038	114.441	HEL	Hevein-like preproprotein [Source:UniProtKB/Swiss-Prot;Acc:P43082]
AT3G05155	1.07449	0.0229755	0.0553934	0.973633	2.20425	1.40382	1.1512	0.587481	0.48636		Sugar transporter ERD6-like 9 [Source:UniProtKB/Swiss-Prot;Acc:Q7XA64]	sugar:proton symporter activity|plasma membrane|carbohydrate transmembrane transporter activity|membrane
AT3G05650	3.66901	2.46992e-20	4.53788e-19	1.45781	1.03859	1.493	0.156604	0.09969	0.0807276	AtRLP32	receptor like protein 32 [Source:TAIR;Acc:AT3G05650]
AT3G05660	3.82908	1.16885e-30	3.49684e-29	1.86911	1.67311	1.93576	0.146844	0.14934	0.0943739	AtRLP33	receptor like protein 33 [Source:TAIR;Acc:AT3G05660]
AT3G05730	1.10329	1.40951e-13	1.65669e-12	942.921	1113.53	1238.85	516.691	582.103	531.202		Defensin-like protein 205 [Source:UniProtKB/Swiss-Prot;Acc:Q9M9M3]	extracellular region|killing of cells of other organism|defense response to fungus
AT3G05770	1.72468	5.33204e-06	2.76273e-05	0.75424	0.780601	1.30376	0.153292	0.342815	0.31481		unknown protein; BEST Arabidopsis thaliana protein match is: unknown protein (TAIR:AT1G54300.1); Has 105 Blast hits to 105 proteins in 16 species: Archae - 0; Bacteria - 0; Metazoa - 0; Fungi - 0; Plants - 99; Viruses - 0; Other Eukaryotes - 6 (sour /.../BI BLink). [Source:TAIR;Acc:AT3G05770]	nucleus|pollen tube development
AT3G05950	3.42398	7.49255e-21	1.41543e-19	5.53203	5.16736	4.28547	0.356451	0.724847	0.222434		Germin-like protein subfamily 1 member 7 [Source:UniProtKB/Swiss-Prot;Acc:Q9SFF9]	extracellular region|manganese ion binding|nutrient reservoir activity|apoplast
AT3G06100	1.27185	0.0288129	0.0674644	0.672276	0.906871	0.442003	0.0478775	0.239726	0.336773	NIP7-1	Probable aquaporin NIP7-1 [Source:UniProtKB/Swiss-Prot;Acc:Q8LAI1]
AT3G06435	1.49747	4.21478e-07	2.56711e-06	3.01806	2.59348	2.61702	0.656523	0.758746	1.37501		Expressed protein [Source:TAIR;Acc:AT3G06435]	molecular_function|mitochondrion|biological_process|integral component of membrane|membrane
AT3G07040	1.08891	4.25549e-15	5.61288e-14	4.89015	5.2984	5.12955	2.38123	2.50807	2.81652	RPM1	Disease resistance protein RPM1 [Source:UniProtKB/Swiss-Prot;Acc:Q39214]	ATP binding|defense response|endomembrane system|ADP binding|protein binding|plasma membrane|nucleotide binding|plant-type hypersensitive response
AT3G07195	1.84557	2.58802e-19	4.46424e-18	6.59401	7.36833	7.58385	2.68327	1.62105	2.16815		RPM1-interacting protein 4 (RIN4) family protein [Source:TAIR;Acc:AT3G07195]	molecular_function|nucleus|biological_process
AT3G07390	1.54209	9.63341e-23	2.0459e-21	78.072	87.1369	99.4188	29.388	33.404	35.0829	AIR12	auxin-responsive family protein [Source:TAIR;Acc:AT3G07390]	plasma membrane|extracellular matrix structural constituent|extracellular region|response to auxin|lateral root morphogenesis|extracellular matrix organization|anchored component of membrane|anchored component of plasma membrane
AT3G07730	1.30672	1.74298e-06	9.75146e-06	3.04721	2.28356	2.16122	1.39175	0.802054	1.04364		unknown protein; BEST Arabidopsis thaliana protein match is: unknown protein (TAIR:AT4G01170.1); Has 1299 Blast hits to 1149 proteins in 206 species: Archae - 3; Bacteria - 100; Metazoa - 453; Fungi - 114; Plants - 108; Viruses - 2; Other Eukaryotes /.../ (source: NCBI BLink). [Source:TAIR;Acc:AT3G07730]	molecular_function|nucleus|biological_process
AT3G08640	1.06311	1.72628e-26	4.31111e-25	49.6412	46.431	50.0168	27.913	24.1973	23.0832		Protein of unknown function (DUF3411) [Source:TAIR;Acc:AT3G08640]
AT3G08770	1.37879	8.98115e-07	5.24385e-06	58.5	39.4144	57.9358	24.558	20.9979	18.6189	LTP6	Non-specific lipid-transfer protein 6 [Source:UniProtKB/Swiss-Prot;Acc:Q9LDB4]	extracellular region|lipid transport|lipid binding|response to water deprivation
AT3G08870	1.28818	0.000153149	0.000616094	0.804514	0.792878	1.0409	0.351469	0.420799	0.381963	LECRK61	Probable L-type lectin-domain containing receptor kinase VI.1 [Source:UniProtKB/Swiss-Prot;Acc:Q9SR87]
AT3G09010	2.92741	8.82048e-45	4.14899e-43	6.05457	5.58108	6.42647	0.852638	0.862787	0.90131		Protein kinase superfamily protein [Source:TAIR;Acc:AT3G09010]	ATP binding|protein phosphorylation|kinase activity|phosphorylation
AT3G09020	1.42394	8.87554e-22	1.77246e-20	12.5645	12.1939	11.928	4.8828	3.78985	5.66426		alpha 1,4-glycosyltransferase family protein [Source:TAIR;Acc:AT3G09020]	Golgi apparatus|integral component of membrane|transferase activity|transferase activity, transferring glycosyl groups
AT3G09405	3.63369	2.58676e-76	2.85824e-74	7.38775	8.15834	8.72633	0.885633	0.688939	0.48268	PAE4	Pectin acetylesterase 4 [Source:UniProtKB/Swiss-Prot;Acc:Q9SR23]	extracellular region|cell wall|hydrolase activity|cell wall organization
AT3G09490	1.2293	4.53203e-12	4.63998e-11	8.77067	9.24445	9.22888	3.61429	4.19853	4.3158		Tetratricopeptide repeat (TPR)-like superfamily protein [Source:TAIR;Acc:AT3G09490]	chloroplast thylakoid lumen|photosynthesis, light reaction
AT3G09830	1.88668	1.40774e-57	9.90277e-56	16.2022	18.1102	18.7525	5.31328	4.8673	5.47865		Protein kinase superfamily protein [Source:TAIR;Acc:AT3G09830]
AT3G09922	1.99927	9.72263e-05	0.00040475	4.49367	3.97838	2.46683	1.60094	0.737637	0.445015	IPS1	induced by phosphate starvation1 [Source:TAIR;Acc:AT3G09922]	molecular_function|mitochondrion|cellular response to phosphate starvation
AT3G09940	4.14011	0	0	188.392	181.199	194.846	12.5178	11.883	10.2255	MDHAR	Probable monodehydroascorbate reductase, cytoplasmic isoform 1 [Source:UniProtKB/Swiss-Prot;Acc:Q9SR59]
AT3G10040	1.82648	2.58551e-09	2.04683e-08	2.44288	2.93911	3.65149	0.667206	0.947098	0.714559		sequence-specific DNA binding transcription factors [Source:TAIR;Acc:AT3G10040]
AT3G10120	1.45601	1.09807e-21	2.17433e-20	20.1042	20.8204	20.8559	8.83572	8.14074	6.50957		unknown protein; BEST Arabidopsis thaliana protein match is: unknown protein (TAIR:AT5G03890.1); Has 57 Blast hits to 57 proteins in 10 species: Archae - 0; Bacteria - 0; Metazoa - 0; Fungi - 0; Plants - 57; Viruses - 0; Other Eukaryotes - 0 (source /.../ BLink). [Source:TAIR;Acc:AT3G10120]	molecular_function|nucleus|biological_process
AT3G11010	2.88203	1.49629e-46	7.53778e-45	10.9184	10.7355	13.0016	1.62095	1.92585	1.76142	AtRLP34	receptor like protein 34 [Source:TAIR;Acc:AT3G11010]
AT3G11260	1.63039	0.00647678	0.0182113	0.809223	1.13547	1.63504	0.596362	0.448209	0.302818	WOX5	WUSCHEL-related homeobox 5 [Source:UniProtKB/Swiss-Prot;Acc:Q8H1D2]	nucleus|transcription, DNA-templated|regulation of transcription, DNA-templated|transcription factor activity, sequence-specific DNA binding|response to auxin|maintenance of root meristem identity|protein binding|sequence-specific DNA binding|positive regulation of stem cell population maintenance
AT3G11340	2.41336	6.3809e-135	1.66081e-132	85.0659	86.6212	93.7124	20.7494	15.7993	16.6313		UDP-Glycosyltransferase superfamily protein [Source:TAIR;Acc:AT3G11340]
AT3G11402	1.94477	2.07136e-08	1.48931e-07	1.24618	1.0484	1.30819	0.41888	0.330397	0.277821	PRA1A3	Cysteine/Histidine-rich C1 domain family protein [Source:TAIR;Acc:AT3G11402]	nucleus|integral component of membrane|protein-disulfide reductase activity|oxidation-reduction process
AT3G11580	1.41967	5.48951e-07	3.29216e-06	3.22223	1.96225	2.18178	0.921309	1.01782	1.2199	ARF32	B3 domain-containing protein At3g11580 [Source:UniProtKB/Swiss-Prot;Acc:Q8RYD3]
AT3G11840	1.30662	9.56862e-15	1.23021e-13	6.37046	7.13561	7.57497	2.91937	2.5918	3.57782	PUB24	plant U-box 24 [Source:TAIR;Acc:AT3G11840]	cytoplasm|response to chitin|respiratory burst involved in defense response|defense response|protein autoubiquitination
AT3G12145	3.36474	3.16167e-36	1.14647e-34	48.2199	35.6211	42.2966	4.01951	5.02932	4.20433	FLR1	Leucine-rich repeat (LRR) family protein [Source:TAIR;Acc:AT3G12145]	enzyme inhibitor activity|transcription factor binding|vegetative to reproductive phase transition of meristem
AT3G12220	2.41162	1.42219e-14	1.80167e-13	1.86915	2.16608	2.13365	0.687638	0.387674	0.429406	SCPL16	Serine carboxypeptidase-like 16 [Source:UniProtKB/Swiss-Prot;Acc:Q9C7D4]
AT3G12230	Inf	1.46082e-07	9.47654e-07	0.302909	0.909727	0.493529	0	0	0	SCPL14	Serine carboxypeptidase-like 14 [Source:UniProtKB/Swiss-Prot;Acc:Q9C7D3]
AT3G12500	2.73674	2.01977e-51	1.17112e-49	112.593	136.874	141.361	14.5777	24.2549	23.9025	CHI-B	Basic endochitinase B [Source:UniProtKB/Swiss-Prot;Acc:P19171]
AT3G12800	1.05581	2.30189e-28	6.30663e-27	68.6745	72.6083	75.7693	36.5234	37.1087	38.465	SDRB	Peroxisomal 2,4-dienoyl-CoA reductase [Source:UniProtKB/Swiss-Prot;Acc:Q9LTV6]	fatty acid metabolic process|2,4-dienoyl-CoA reductase (NADPH) activity|oxidation-reduction process|vacuolar membrane|peroxisome|cytosol
AT3G13080	1.84878	1.30992e-19	2.30714e-18	36.3044	38.3175	48.2091	11.4139	11.7998	12.6823	ABCC3	ABC transporter C family member 3 [Source:UniProtKB/Swiss-Prot;Acc:Q9LK64]	ATP binding|plasma membrane|xenobiotic-transporting ATPase activity|integral component of membrane|ATPase activity, coupled to transmembrane movement of substances|transmembrane transport|plant-type vacuole|vacuolar membrane|apoplast|plasmodesma|vacuole|chlorophyll catabolite transmembrane transporter activity|glutathione S-conjugate-exporting ATPase activity
AT3G13090	2.25256	5.54167e-21	1.05454e-19	2.25874	3.24644	3.11978	0.668991	0.62283	0.494081	ABCC6	ABC transporter C family member 6 [Source:UniProtKB/Swiss-Prot;Acc:Q8VZZ4]	ATP binding|xenobiotic-transporting ATPase activity|integral component of membrane|ATPase activity, coupled to transmembrane movement of substances|vacuolar membrane|plasmodesma
AT3G13100	3.1267	2.99284e-77	3.33845e-75	7.14406	6.95335	8.47968	0.981212	0.992749	0.730902	ABCC7	ABC transporter C family member 7 [Source:UniProtKB/Swiss-Prot;Acc:Q9LK62]	ATP binding|xenobiotic-transporting ATPase activity|integral component of membrane|ATPase activity, coupled to transmembrane movement of substances|response to other organism|vacuolar membrane
AT3G13110	1.27716	1.73451e-42	7.69526e-41	107.939	95.8296	94.519	46.2211	42.7966	42.6775	SAT3	Serine acetyltransferase 3, mitochondrial [Source:UniProtKB/Swiss-Prot;Acc:Q39218]
AT3G13437	1.41743	0.000396973	0.00147475	2.95155	4.54733	4.16782	1.53171	1.81698	1.82727		unknown protein; FUNCTIONS IN: molecular_function unknown; INVOLVED IN: biological_process unknown; LOCATED IN: endomembrane system; Has 4 Blast hits to 4 proteins in 2 species: Archae - 0; Bacteria - 0; Metazoa - 0; Fungi - 0; Plants - 4; Viruses - /.../her Eukaryotes - 0 (source: NCBI BLink). [Source:TAIR;Acc:AT3G13437]
AT3G13650	1.27368	4.94272e-17	7.422e-16	19.0338	16.6702	20.8315	9.14144	7.37299	8.5037	DIR7	Dirigent protein 7 [Source:UniProtKB/Swiss-Prot;Acc:Q9LID5]	molecular_function|extracellular region|defense response|lignan biosynthetic process|apoplast
AT3G13790	1.47556	2.77566e-45	1.34896e-43	109.136	122.405	129.175	51.4177	43.5297	42.8331	CWINV1	Beta-fructofuranosidase, insoluble isoenzyme CWINV1 [Source:UniProtKB/Swiss-Prot;Acc:Q43866]
AT3G13910	2.0832	4.67762e-51	2.67252e-49	56.3938	54.2161	54.1083	16.21	12.3373	12.6814		Protein of unknown function (DUF3511) [Source:TAIR;Acc:AT3G13910]	molecular_function|nucleus|biological_process|plasma membrane
AT3G13950	2.85221	1.06939e-38	4.21723e-37	11.2726	10.1702	11.0952	1.51785	1.27139	1.66244		unknown protein; BEST Arabidopsis thaliana protein match is: unknown protein (TAIR:AT4G13266.1); Has 339 Blast hits to 265 proteins in 12 species: Archae - 0; Bacteria - 0; Metazoa - 0; Fungi - 0; Plants - 339; Viruses - 0; Other Eukaryotes - 0 (sou /.../CBI BLink). [Source:TAIR;Acc:AT3G13950]	molecular_function|integral component of membrane
AT3G14210	2.36641	2.80176e-28	7.63153e-27	409.037	479.978	548.618	102.053	86.0264	109.542	ESM1	GDSL esterase/lipase ESM1 [Source:UniProtKB/Swiss-Prot;Acc:Q9LJG3]	extracellular region|lipid catabolic process|hydrolase activity, acting on ester bonds|carboxylic ester hydrolase activity|chloroplast envelope|nucleus|response to cold|chloroplast|vacuole|cytosolic ribosome|response to insect|glucosinolate catabolic process|defense response to bacterium|membrane|peroxisome|apoplast|plasmodesma
AT3G14260	1.41117	1.00574e-05	5.00838e-05	2.9505	3.44135	2.50156	1.21315	1.23617	1.24238		Protein LURP-one-related 11 [Source:UniProtKB/Swiss-Prot;Acc:Q9LUM1]	molecular_function|cellular_component|biological_process
AT3G14310	1.64701	3.66849e-83	4.52286e-81	178.375	158.984	169.723	57.8252	56.7024	57.399	PME3	Pectinesterase/pectinesterase inhibitor 3 [Source:UniProtKB/Swiss-Prot;Acc:O49006]	cell wall modification|aspartyl esterase activity|pectin catabolic process|pectinesterase inhibitor activity|plasma membrane|apoplast|cell wall|cytoplasm|response to nematode|pectinesterase activity|response to fungus|defense response to Gram-negative bacterium
AT3G14380	2.52402	0.00344564	0.0104026	0.611351	1.23378	1.27261	0.209189	0.102574	0.204542		CASP-like protein 2A2 [Source:UniProtKB/Swiss-Prot;Acc:Q9LUL1]
AT3G14395	1.86717	0.0232463	0.0559827	4.66317	5.88672	1.49041	1.53585	0.52208	1.20987		unknown protein; Has 4 Blast hits to 4 proteins in 2 species: Archae - 0; Bacteria - 0; Metazoa - 0; Fungi - 0; Plants - 4; Viruses - 0; Other Eukaryotes - 0 (source: NCBI BLink). [Source:TAIR;Acc:AT3G14395]	molecular_function|nucleus|biological_process
AT3G14620	4.02664	5.9861e-259	6.09671e-256	44.3298	44.3818	49.4766	2.97262	2.84167	3.12709	CYP72A8	cytochrome P450, family 72, subfamily A, polypeptide 8 [Source:TAIR;Acc:AT3G14620]	monooxygenase activity|iron ion binding|integral component of membrane|oxidoreductase activity, acting on paired donors, with incorporation or reduction of molecular oxygen|oxygen binding|heme binding|oxidation-reduction process|circadian rhythm
AT3G14680	1.12639	3.62727e-12	3.74973e-11	13.2599	16.1014	17.3308	7.12388	6.9463	8.57709	CYP72A14	Cytochrome P450 72A14 [Source:UniProtKB/Swiss-Prot;Acc:Q9LUC6]	monooxygenase activity|iron ion binding|integral component of membrane|oxidoreductase activity, acting on paired donors, with incorporation or reduction of molecular oxygen|oxygen binding|heme binding|oxidation-reduction process
AT3G14700	1.60965	4.67266e-07	2.83128e-06	2.28637	2.54921	2.72475	0.785311	0.645547	0.861723		SART-1 family [Source:TAIR;Acc:AT3G14700]	molecular_function|nucleus
AT3G14710	1.95669	0.0333564	0.0763508	0.249499	0.347221	0.308188	0.147852	0.0493669	0.149574		F-box/FBD/LRR-repeat protein At3g14710 [Source:UniProtKB/Swiss-Prot;Acc:Q9LUC4]	molecular_function|nucleus|biological_process
AT3G14840	1.09431	1.49262e-25	3.59348e-24	58.0253	63.1085	70.3427	31.4338	31.5822	32.5441	LRR-RLK	Probable leucine-rich repeat receptor-like serine/threonine-protein kinase At3g14840 [Source:UniProtKB/Swiss-Prot;Acc:C0LGN2]
AT3G15356	3.77611	0	0	923.404	890.304	941.577	62.8153	72.6568	76.9375	LEC	Lectin-like protein LEC [Source:UniProtKB/Swiss-Prot;Acc:Q9LJR2]	plasma membrane|ethylene-activated signaling pathway|carbohydrate binding|cell wall|apoplast|response to wounding|cellular response to chitin|cellular response to ethylene stimulus|cellular response to jasmonic acid stimulus|defense response to fungus, incompatible interaction
AT3G15370	3.37065	3.01494e-10	2.60609e-09	1.1168	2.48562	1.24945	0.182831	0	0.182095	EXPA12	Expansin-A12 [Source:UniProtKB/Swiss-Prot;Acc:Q9LDJ3]	extracellular region|cell wall|plant-type cell wall organization|unidimensional cell growth|plant-type cell wall loosening|membrane
AT3G15500	2.52539	1.94121e-98	3.09339e-96	35.795	39.445	38.0932	4.68831	8.16296	8.20907	NAC055	NAC domain-containing protein 55 [Source:UniProtKB/Swiss-Prot;Acc:Q9LDY8]
AT3G15510	1.95651	2.0394e-54	1.28768e-52	19.2502	18.635	19.4014	4.84788	5.56898	5.58437	ATNAC2	NAC domain containing protein 2 [Source:TAIR;Acc:AT3G15510]
AT3G15518	3.38975	1.02303e-45	5.04514e-44	20.6288	25.8126	27.5489	2.31051	2.18725	2.97847		unknown protein; FUNCTIONS IN: molecular_function unknown; INVOLVED IN: biological_process unknown; LOCATED IN: cellular_component unknown; Has 30201 Blast hits to 17322 proteins in 780 species: Archae - 12; Bacteria - 1396; Metazoa - 17338; Fungi - /.../ Plants - 5037; Viruses - 0; Other Eukaryotes - 2996 (source: NCBI BLink). [Source:TAIR;Acc:AT3G15518]	molecular_function|mitochondrion|biological_process
AT3G15650	1.49631	9.78103e-06	4.87906e-05	1.9069	1.78068	1.85133	0.708087	0.533843	0.4751		alpha/beta-Hydrolases superfamily protein [Source:TAIR;Acc:AT3G15650]	carboxylic ester hydrolase activity
AT3G15720	2.07015	5.60984e-17	8.37009e-16	3.03008	3.26562	2.39163	0.897341	0.664096	0.635875		Probable polygalacturonase At3g15720 [Source:UniProtKB/Swiss-Prot;Acc:Q9LW07]	polygalacturonase activity|extracellular region|carbohydrate metabolic process|integral component of membrane|cell wall organization|anchored component of membrane|anchored component of plasma membrane|plant-type cell wall
AT3G16530	4.94824	0	0	409.505	381.217	392.117	15.0976	10.3692	15.2037		Lectin-like protein At3g16530 [Source:UniProtKB/Swiss-Prot;Acc:Q9LK72]	plasma membrane|carbohydrate binding|nucleus|cell wall|response to chitin|plant-type cell wall|apoplast|response to oomycetes|defense response to fungus
AT3G16565	1.57608	5.53502e-15	7.23134e-14	4.64574	4.35758	5.06824	1.83564	1.58319	1.01697		alanine-tRNA ligases;nucleic acid binding;ligases, forming aminoacyl-tRNA and related compounds;nucleotide binding;ATP binding [Source:TAIR;Acc:AT3G16565]	alanine-tRNA ligase activity|ATP binding|cytoplasm|alanyl-tRNA aminoacylation
AT3G16660	1.05391	1.61277e-19	2.81513e-18	145.405	145.452	165.785	84.1197	84.8006	68.0805		Pollen Ole e 1 allergen and extensin family protein [Source:TAIR;Acc:AT3G16660]	molecular_function|extracellular region|biological_process|integral component of membrane
AT3G16670	1.44202	9.44309e-05	0.000394726	174.885	227.026	314.224	86.0543	102.618	90.6679		Pollen Ole e 1 allergen and extensin family protein [Source:TAIR;Acc:AT3G16670]	molecular_function|extracellular region|response to oxidative stress
AT3G16770	1.09106	1.8036e-24	4.1666e-23	843.824	820.321	828.688	342.758	415.582	486.772	RAP2-3	Ethylene-responsive transcription factor RAP2-3 [Source:UniProtKB/Swiss-Prot;Acc:P42736]
AT3G16990	1.12003	3.05806e-13	3.4961e-12	15.1195	15.4012	17.8349	9.20912	8.1797	5.54647	TENA_E	Bifunctional TENA-E protein [Source:UniProtKB/Swiss-Prot;Acc:Q9ASY9]	cellular_component|thiamine biosynthetic process|thiamine diphosphate biosynthetic process|thiaminase activity
AT3G17070	1.34254	1.02099e-20	1.9164e-19	15.6469	18.0612	17.1619	7.61052	7.03591	6.15117	PER29	Peroxidase 29 [Source:UniProtKB/Swiss-Prot;Acc:Q9LSP0]	peroxidase activity|extracellular region|response to oxidative stress|heme binding|hydrogen peroxide catabolic process|metal ion binding|oxidation-reduction process
AT3G17690	4.17629	2.88879e-40	1.20839e-38	3.88811	4.5578	5.51127	0.255543	0.319904	0.180759	CNGC19	Putative cyclic nucleotide-gated ion channel 19 [Source:UniProtKB/Swiss-Prot;Acc:Q9LDR2]	ion channel activity|voltage-gated potassium channel activity|calmodulin binding|integral component of plasma membrane|chloroplast|cyclic nucleotide binding|cAMP binding|cGMP binding|regulation of membrane potential
AT3G17700	1.16653	5.91388e-17	8.81251e-16	7.28042	7.64468	8.4063	3.93413	3.3567	3.66034	CNGC20	Probable cyclic nucleotide-gated ion channel 20, chloroplastic [Source:UniProtKB/Swiss-Prot;Acc:Q9LD37]
AT3G18080	1.12362	1.05911e-14	1.35869e-13	97.3088	110.577	124.161	49.6014	56.996	55.421	BGLU44	Beta-glucosidase 44 [Source:UniProtKB/Swiss-Prot;Acc:Q9LV33]	hydrolase activity, hydrolyzing O-glycosyl compounds|extracellular region|carbohydrate metabolic process|chloroplast|metal ion binding|glycosyl compound metabolic process|cell wall|beta-mannosidase activity|beta-glucosidase activity|amygdalin beta-glucosidase activity|cellobiose glucosidase activity|4-methylumbelliferyl-beta-D-glucopyranoside beta-glucosidase activity|esculin beta-glucosidase act…
AT3G18250	4.32733	9.53033e-56	6.31127e-54	40.6013	39.4146	43.5275	1.35726	1.96527	2.36207		Putative membrane lipoprotein [Source:TAIR;Acc:AT3G18250]	molecular_function|biological_process|integral component of membrane|endoplasmic reticulum
AT3G18830	1.12382	6.35583e-26	1.5525e-24	62.1449	65.3193	72.2421	31.8258	31.8911	34.8263	PLT5	Polyol transporter 5 [Source:UniProtKB/Swiss-Prot;Acc:Q8VZ80]
AT3G19010	1.66662	8.76365e-76	9.46029e-74	92.879	98.6506	102.554	36.6578	30.615	33.7182		2-oxoglutarate (2OG) and Fe(II)-dependent oxygenase superfamily protein [Source:TAIR;Acc:AT3G19010]	iron ion binding|cytoplasm|flavonoid biosynthetic process|flavonol synthase activity|metal ion binding|oxidation-reduction process
AT3G19200	1.47481	7.2657e-05	0.00030934	6.87083	6.22623	11.0765	2.99056	3.31821	3.188		unknown protein; BEST Arabidopsis thaliana protein match is: unknown protein (TAIR:AT4G34419.1); Has 51 Blast hits to 51 proteins in 10 species: Archae - 0; Bacteria - 0; Metazoa - 0; Fungi - 0; Plants - 51; Viruses - 0; Other Eukaryotes - 0 (source /.../ BLink). [Source:TAIR;Acc:AT3G19200]	molecular_function|nucleus|biological_process
AT3G19615	3.51908	3.5322e-09	2.75898e-08	4.41751	4.86627	5.56694	0.564474	0.371737	0.377739		unknown protein; FUNCTIONS IN: molecular_function unknown; INVOLVED IN: biological_process unknown; LOCATED IN: cellular_component unknown; Has 10 Blast hits to 10 proteins in 5 species: Archae - 0; Bacteria - 0; Metazoa - 0; Fungi - 0; Plants - 10; /.../es - 0; Other Eukaryotes - 0 (source: NCBI BLink). [Source:TAIR;Acc:AT3G19615]	molecular_function|mitochondrion|biological_process
AT3G19660	1.41562	1.37863e-06	7.83273e-06	24.103	20.4124	16.5385	7.63258	6.11251	10.4419		unknown protein; Has 16 Blast hits to 16 proteins in 6 species: Archae - 0; Bacteria - 0; Metazoa - 0; Fungi - 0; Plants - 16; Viruses - 0; Other Eukaryotes - 0 (source: NCBI BLink). [Source:TAIR;Acc:AT3G19660]	molecular_function|mitochondrion|biological_process
AT3G19710	3.07949	6.88897e-202	3.36196e-199	97.102	97.5527	101.944	17.4418	6.78138	14.8739	BCAT4	Methionine aminotransferase BCAT4 [Source:UniProtKB/Swiss-Prot;Acc:Q9LE06]	catalytic activity|branched-chain-amino-acid transaminase activity|cytoplasm|branched-chain amino acid metabolic process|cytosol|response to light stimulus|response to wounding|methionine-oxo-acid transaminase activity|glucosinolate biosynthetic process
AT3G19930	1.36008	4.73707e-51	2.6999e-49	97.8835	105.58	112.143	40.9479	44.8746	44.3489	STP4	Sugar transport protein 4 [Source:UniProtKB/Swiss-Prot;Acc:Q39228]	sugar:proton symporter activity|glucose transmembrane transporter activity|integral component of plasma membrane|carbohydrate transmembrane transporter activity|membrane|hexose transmembrane transport|glucose import|plasma membrane|sucrose:proton symporter activity|monosaccharide transmembrane transporter activity|sucrose transport
AT3G20180	Inf	0.0199507	0.0489162	0.289348	0.950704	0	0	0	0		Copper transport protein family [Source:TAIR;Acc:AT3G20180]
AT3G20380	1.57374	8.65724e-25	2.02796e-23	12.6137	13.7397	12.5468	6.39996	3.47662	4.27539		TRAF-like family protein [Source:TAIR;Acc:AT3G20380]	extracellular region
AT3G20470	2.43389	3.30856e-121	7.17621e-119	105.411	113.74	107.79	22.3007	23.8025	20.8699	GRP-5	glycine-rich protein 5 [Source:TAIR;Acc:AT3G20470]
AT3G20590	2.44796	0.00336898	0.0101909	1.63488	2.76697	4.55229	0.763426	0.561658	0.142743		Late embryogenesis abundant (LEA) hydroxyproline-rich glycoprotein family [Source:TAIR;Acc:AT3G20590]	plasma membrane
AT3G20600	1.48446	7.61012e-14	9.12319e-13	9.29769	9.74247	10.3296	3.24777	3.40012	4.31983	NDR1	Protein NDR1 [Source:UniProtKB/Swiss-Prot;Acc:O48915]	plasmodesma|defense response to bacterium, incompatible interaction|defense response to fungus, incompatible interaction|plant-type hypersensitive response|defense response to bacterium|anchored component of plasma membrane|protein binding|positive regulation of cell death|plasma membrane|defense response, incompatible interaction|signal transducer activity|defense response|membrane
AT3G20940	1.00777	2.27251e-05	0.000106276	8.53816	10.6104	7.21727	4.88697	4.99704	4.07702	CYP705A30	cytochrome P450, family 705, subfamily A, polypeptide 30 [Source:TAIR;Acc:AT3G20940]	iron ion binding|extracellular region|membrane|integral component of membrane|oxidoreductase activity, acting on paired donors, with incorporation or reduction of molecular oxygen, NAD(P)H as one donor, and incorporation of one atom of oxygen|oxygen binding|heme binding|secondary metabolite biosynthetic process|oxidation-reduction process
AT3G21080	6.43497	1.39252e-121	3.07733e-119	15.4768	15.9001	14.5319	0.27924	0.228558	0.174159		ABC transporter-related [Source:TAIR;Acc:AT3G21080]	molecular_function|nucleus|biological_process|integral component of membrane
AT3G21230	2.18743	1.93914e-54	1.23101e-52	40.3479	41.0022	48.2514	10.4122	9.4717	10.3459	4CL4	4-coumarate--CoA ligase 4 [Source:UniProtKB/Swiss-Prot;Acc:Q9LU36]
AT3G21320	1.50442	0.038851	0.0870645	0.177683	0.199097	0.344844	0.0867909	0.109671	0.0666403		BEST Arabidopsis thaliana protein match is: hydroxyproline-rich glycoprotein family protein (TAIR:AT2G25930.1); Has 63 Blast hits to 58 proteins in 21 species: Archae - 0; Bacteria - 0; Metazoa - 3; Fungi - 0; Plants - 58; Viruses - 0; Other Eukaryo /.../2 (source: NCBI BLink). [Source:TAIR;Acc:AT3G21320]	molecular_function|nucleus|biological_process
AT3G21351	2.38119	7.37693e-31	2.22974e-29	30.7983	36.789	37.3554	7.55207	6.37489	6.2926		unknown protein; LOCATED IN: endomembrane system; BEST Arabidopsis thaliana protein match is: unknown protein (TAIR:AT3G21352.1). [Source:TAIR;Acc:AT3G21351]	extracellular region
AT3G21352	Inf	5.33516e-05	0.000233338	2.96929	1.2724	0.635399	0	0	0		unknown protein; FUNCTIONS IN: molecular_function unknown; INVOLVED IN: biological_process unknown; LOCATED IN: endomembrane system; BEST Arabidopsis thaliana protein match is: unknown protein (TAIR:AT3G21351.1); Has 26 Blast hits to 26 proteins in /.../ies: Archae - 0; Bacteria - 0; Metazoa - 0; Fungi - 0; Plants - 26; Viruses - 0; Other Eukaryotes - 0 (source: NCBI BLink). [Source:TAIR;Acc:AT3G…	molecular_function|extracellular region|biological_process
AT3G21750	1.28228	1.3625e-23	2.99124e-22	13.0953	13.227	12.2305	5.50271	6.08631	5.22551	UGT71B1	UDP-glycosyltransferase 71B1 [Source:UniProtKB/Swiss-Prot;Acc:Q9LSY9]	metabolic process|UDP-glycosyltransferase activity|transferase activity, transferring glycosyl groups|flavonol 3-O-glucosyltransferase activity|UDP-glucosyltransferase activity|quercetin 3-O-glucosyltransferase activity|cytosol
AT3G21780	2.01526	1.69146e-36	6.191e-35	9.246	9.62765	10.6855	2.35152	2.88845	2.52696	UGT71B6	UDP-glycosyltransferase 71B6 [Source:UniProtKB/Swiss-Prot;Acc:Q9LSY6]	UDP-glycosyltransferase activity|abscisic acid glucosyltransferase activity|transferase activity, transferring glycosyl groups|transferase activity, transferring hexosyl groups|abscisic acid catabolic process|response to osmotic stress|response to salt stress|response to abscisic acid|membrane
AT3G22060	1.10681	7.14125e-27	1.82824e-25	89.3786	96.7615	104.431	50.2698	48.2597	43.8029	CRRSP38	Cysteine-rich repeat secretory protein 38 [Source:UniProtKB/Swiss-Prot;Acc:Q9LRJ9]	molecular_function|extracellular region|vacuole|cell wall|response to abscisic acid
AT3G22120	1.42143	1.3084e-22	2.75623e-21	846.452	876.16	946.219	270.438	404.792	372.241	CWLP	cell wall-plasma membrane linker protein [Source:TAIR;Acc:AT3G22120]	lipid transport|lipid binding
AT3G22160	1.74177	9.70536e-34	3.29013e-32	22.9865	24.0066	27.1012	8.7697	7.59705	7.27258	VQ22	VQ motif-containing protein 22 [Source:UniProtKB/Swiss-Prot;Acc:Q9LIE6]
AT3G22231	Inf	4.87873e-79	5.54778e-77	20.5381	21.754	20.7928	0	0	0	PCC1	Cysteine-rich and transmembrane domain-containing protein PCC1 [Source:UniProtKB/Swiss-Prot;Acc:Q94C26]	molecular_function|nucleus|lipid metabolic process|defense response|response to bacterium|response to fungus|abscisic acid-activated signaling pathway|integral component of membrane|plasma membrane|circadian rhythm|positive regulation of defense response to oomycetes|salicylic acid mediated signaling pathway|cellular response to UV-C|regulation of photoperiodism, flowering|membrane|response to ab…
AT3G22235	6.32777	4.65445e-219	2.65928e-216	66.4352	70.2589	64.6107	0.739001	0.862631	1.09251		BEST Arabidopsis thaliana protein match is: pathogen and circadian controlled 1 (TAIR:AT3G22231.1); Has 122 Blast hits to 122 proteins in 11 species: Archae - 0; Bacteria - 0; Metazoa - 0; Fungi - 0; Plants - 122; Viruses - 0; Other Eukaryotes - 0 ( /.../: NCBI BLink). [Source:TAIR;Acc:AT3G22235]	molecular_function|nucleus|biological_process
AT3G22275	3.04994	6.45255e-05	0.000277545	1.02134	1.51514	1.15932	0.0991998	0.201862	0.204284		unknown protein; FUNCTIONS IN: molecular_function unknown; INVOLVED IN: biological_process unknown; LOCATED IN: cellular_component unknown; Has 22 Blast hits to 22 proteins in 6 species: Archae - 0; Bacteria - 0; Metazoa - 0; Fungi - 0; Plants - 22; /.../es - 0; Other Eukaryotes - 0 (source: NCBI BLink). [Source:TAIR;Acc:AT3G22275]
AT3G22640	1.86073	0.0139447	0.0358764	0.175058	0.291678	0.332847	0	0.201643	0.0584218	PAP85	cupin family protein [Source:TAIR;Acc:AT3G22640]	extracellular region|nutrient reservoir activity|plant-type cell wall|response to virus|response to cytokinin
AT3G22740	3.21363	9.29985e-24	2.06492e-22	5.38112	5.39771	7.28565	0.997922	0.574943	0.613381	HMT3	Homocysteine S-methyltransferase 3 [Source:UniProtKB/Swiss-Prot;Acc:Q8LAX0]	cytoplasm|methyltransferase activity|S-adenosylmethionine-homocysteine S-methyltransferase activity|methionine biosynthetic process|methylation|metal ion binding|plasma membrane
AT3G22770	Inf	0.0298415	0.0694179	0.112324	0.279733	0.115912	0	0	0		F-box associated ubiquitination effector family protein [Source:TAIR;Acc:AT3G22770]	molecular_function|cytoplasm|biological_process
AT3G22890	1.40033	4.47791e-64	3.61707e-62	415.154	422.639	424.84	198.903	145.61	166.342	APS1	ATP sulfurylase 1, chloroplastic [Source:UniProtKB/Swiss-Prot;Acc:Q9LIK9]	sulfate assimilation|ATP binding|chloroplast|hydrogen sulfide biosynthetic process|selenium compound metabolic process|chloroplast stroma|response to cadmium ion|plasma membrane|cytosol|response to cytokinin|sulfate adenylyltransferase (ATP) activity
AT3G22910	2.29535	8.28567e-18	1.31099e-16	3.91145	3.95869	5.30197	0.636761	1.12759	1.1315	ACA13	Putative calcium-transporting ATPase 13, plasma membrane-type [Source:UniProtKB/Swiss-Prot;Acc:Q9LIK7]	calcium-transporting ATPase activity|calmodulin binding|ATP binding|integral component of plasma membrane|intracellular membrane-bounded organelle|metal ion binding|calcium ion transmembrane transport
AT3G23010	2.69255	3.25027e-11	3.08749e-10	1.12066	1.09175	1.06844	0.164367	0.134627	0.0676078	AtRLP36	receptor like protein 36 [Source:TAIR;Acc:AT3G23010]
AT3G23110	2.65905	3.52192e-27	9.12621e-26	2.75304	2.64653	3.17362	0.367938	0.60097	0.494443	AtRLP37	receptor like protein 37 [Source:TAIR;Acc:AT3G23110]
AT3G23120	5.08272	1.94945e-64	1.58014e-62	3.50727	3.47225	4.2225	0.114438	0.0941488	0.142709	AtRLP38	receptor like protein 38 [Source:TAIR;Acc:AT3G23120]
AT3G23230	3.05359	1.52443e-10	1.3547e-09	2.12182	2.61018	3.06238	0.20014	0.388204	0.592035	ERF098	Ethylene-responsive transcription factor ERF098 [Source:UniProtKB/Swiss-Prot;Acc:Q9LTC5]
AT3G23240	3.30529	6.99258e-41	2.96741e-39	9.16529	9.20573	9.4362	0.724407	1.07481	1.28165	ERF1B	Ethylene-responsive transcription factor 1B [Source:UniProtKB/Swiss-Prot;Acc:Q8LDC8]
AT3G23250	7.33887	1.30046e-84	1.65562e-82	11.5451	13.3333	15.1931	0.0655916	0.0672176	0	MYB15	myb domain protein 15 [Source:TAIR;Acc:AT3G23250]	DNA binding|nucleus|transcription factor activity, sequence-specific DNA binding|response to salt stress|response to ethylene|response to auxin|response to jasmonic acid|response to cadmium ion|response to chitin|regulation of transcription, DNA-templated
AT3G23480	1.3112	8.27759e-05	0.000349311	0.429024	0.499747	0.661371	0.129734	0.345375	0.213866		Cyclopropane-fatty-acyl-phospholipid synthase [Source:TAIR;Acc:AT3G23480]	cytoplasm|lipid biosynthetic process
AT3G23510	1.04902	0.000578712	0.00207824	5.98164	10.0062	8.98824	5.42537	4.06921	3.56621		Cyclopropane-fatty-acyl-phospholipid synthase [Source:TAIR;Acc:AT3G23510]	cytoplasm|lipid biosynthetic process|cyclopropane-fatty-acyl-phospholipid synthase activity|oxidoreductase activity|oxidation-reduction process
AT3G23550	6.81924	0	0	74.7044	75.9595	79.0777	0.873114	0.919001	0.403057	LAL5	MATE efflux family protein LAL5 [Source:UniProtKB/Swiss-Prot;Acc:Q9LUH3]
AT3G23570	1.63202	3.2178e-40	1.34123e-38	26.4309	30.1702	28.9017	12.3406	8.38681	9.8289		alpha/beta-Hydrolases superfamily protein [Source:TAIR;Acc:AT3G23570]	cytoplasm|hydrolase activity|cytosol
AT3G24090	1.15394	6.84646e-15	8.87539e-14	5.90276	5.46929	5.55327	3.01038	1.98326	2.79731		glutamine-fructose-6-phosphate transaminase (isomerizing)s;sugar binding;transaminases [Source:TAIR;Acc:AT3G24090]
AT3G24900	6.67716	1.04629e-15	1.42911e-14	0.489013	0.824404	0.880388	0	0	0.0231617	AtRLP39	receptor like protein 39 [Source:TAIR;Acc:AT3G24900]
AT3G24982	2.42207	1.81441e-06	1.01317e-05	1.29122	0.771945	1.5822	0.245224	0.208657	0.253588	ATRLP40	receptor like protein 40 [Source:TAIR;Acc:AT3G24982]
AT3G25010	6.19507	6.65683e-32	2.0875e-30	4.21943	5.14223	6.50663	0.0895998	0.0677647	0.0690594	AtRLP41	receptor like protein 41 [Source:TAIR;Acc:AT3G25010]
AT3G25020	1.58092	5.79929e-20	1.03464e-18	4.79431	4.96996	5.90815	1.58118	2.05088	1.70118	AtRLP42	receptor like protein 42 [Source:TAIR;Acc:AT3G25020]
AT3G25070	1.33974	3.57648e-38	1.38707e-36	48.7204	50.3306	52.9954	20.1094	19.6426	21.5078	RIN4	RPM1-interacting protein 4 [Source:UniProtKB/Swiss-Prot;Acc:Q8GYN5]	nucleus|endomembrane system|defense response to bacterium, incompatible interaction|protein binding|protein phosphorylation|membrane|plant-type hypersensitive response|plasma membrane|response to molecule of bacterial origin|defense response signaling pathway, resistance gene-independent|negative regulation of plant-type hypersensitive response|extrinsic component of plasma membrane
AT3G25180	Inf	1.35227e-39	5.49947e-38	1.64451	1.79931	1.96111	0	0	0	CYP82G1	Cytochrome P450 82G1 [Source:UniProtKB/Swiss-Prot;Acc:Q9LSF8]	iron ion binding|defense response|chloroplast|membrane|integral component of membrane|terpenoid biosynthetic process|oxygen binding|heme binding|secondary metabolite biosynthetic process|oxidation-reduction process|terpene biosynthetic process|4,8,12-trimethyltrideca-1,3,7,11-tetraene synthase activity|(3E)-4,8-dimethyl-1,3,7-nonatriene synthase activity
AT3G25510	2.44147	1.16584e-31	3.622e-30	1.25493	1.19145	1.25727	0.244415	0.22423	0.199476		disease resistance protein (TIR-NBS-LRR class), putative [Source:TAIR;Acc:AT3G25510]	ATP binding|defense response|signal transduction|ADP binding
AT3G25610	1.64586	3.67999e-55	2.39455e-53	14.1045	13.9976	15.6485	5.52424	4.31389	5.13078	ALA10	Phospholipid-transporting ATPase 10 [Source:UniProtKB/Swiss-Prot;Acc:Q9LI83]	magnesium ion binding|phospholipid-translocating ATPase activity|ATP binding|trans-Golgi network|ATPase activity, coupled to transmembrane movement of ions, phosphorylative mechanism|integral component of membrane|Golgi vesicle budding|plasma membrane
AT3G25760	4.16439	0	0	318.734	304.865	295.528	20.2294	15.6593	18.3787	AOC1	Allene oxide cyclase 1, chloroplastic [Source:UniProtKB/Swiss-Prot;Acc:Q9LS03]	chloroplast|jasmonic acid biosynthetic process|allene-oxide cyclase activity|chloroplast envelope|chloroplast thylakoid membrane|response to desiccation
AT3G25770	4.00119	0	0	636.509	636.253	626.47	49.0152	34.2092	43.8529	AOC2	Allene oxide cyclase 2, chloroplastic [Source:UniProtKB/Swiss-Prot;Acc:Q9LS02]	chloroplast|jasmonic acid biosynthetic process|allene-oxide cyclase activity|chloroplast envelope|chloroplast thylakoid membrane|response to cold|stromule|chloroplast stroma
AT3G25780	3.63335	9.15641e-95	1.37493e-92	99.6403	108.184	121.632	9.53016	8.53797	8.80928	AOC3	Allene oxide cyclase 3, chloroplastic [Source:UniProtKB/Swiss-Prot;Acc:Q9LS01]	chloroplast|jasmonic acid biosynthetic process|allene-oxide cyclase activity|plasma membrane|vacuolar membrane|membrane|response to salt stress|response to fungus
AT3G25880	1.88807	0.00640057	0.0180165	0	0	0	0	0	0		NAD(P)-binding Rossmann-fold superfamily protein [Source:TAIR;Acc:AT3G25880]	nucleus|response to auxin
AT3G25882	4.72711	6.0691e-67	5.32467e-65	25.5781	25.6468	31.044	1.31885	0.765393	0.887637	NIMIN-2	Protein NIM1-INTERACTING 2 [Source:UniProtKB/Swiss-Prot;Acc:Q9LUA3]	nucleus|biological_process|protein binding
AT3G26170	2.29291	1.75184e-31	5.39958e-30	5.4351	5.63107	5.45043	0.929649	1.49582	1.15733	CYP71B19	Cytochrome P450 71B19 [Source:UniProtKB/Swiss-Prot;Acc:Q9LTM4]	iron ion binding|membrane|integral component of membrane|oxidoreductase activity, acting on paired donors, with incorporation or reduction of molecular oxygen, NAD(P)H as one donor, and incorporation of one atom of oxygen|oxygen binding|heme binding|secondary metabolite biosynthetic process|oxidation-reduction process|defense response to other organism
AT3G26190	Inf	0.0437522	0.0963247	0.0340282	0.0335696	0.0701355	0	0	0	CYP71B21	Cytochrome P450 71B21 [Source:UniProtKB/Swiss-Prot;Acc:Q9LTM2]	iron ion binding|extracellular region|membrane|integral component of membrane|oxidoreductase activity, acting on paired donors, with incorporation or reduction of molecular oxygen, NAD(P)H as one donor, and incorporation of one atom of oxygen|oxygen binding|heme binding|secondary metabolite biosynthetic process|oxidation-reduction process
AT3G26200	6.15306	9.72442e-53	5.90142e-51	10.8368	8.70102	7.87596	0.163628	0.111581	0.141552	CYP71B22	Cytochrome P450 71B22 [Source:UniProtKB/Swiss-Prot;Acc:Q9LTM1]	iron ion binding|membrane|integral component of membrane|oxidoreductase activity, acting on paired donors, with incorporation or reduction of molecular oxygen, NAD(P)H as one donor, and incorporation of one atom of oxygen|oxygen binding|heme binding|secondary metabolite biosynthetic process|oxidation-reduction process
AT3G26210	2.34321	2.55967e-48	1.34742e-46	31.8248	34.4117	39.1768	6.4918	7.25786	8.05169	CYP71B23	Cytochrome P450 71B23 [Source:UniProtKB/Swiss-Prot;Acc:Q9LTM0]	iron ion binding|membrane|integral component of membrane|oxidoreductase activity, acting on paired donors, with incorporation or reduction of molecular oxygen, NAD(P)H as one donor, and incorporation of one atom of oxygen|oxygen binding|heme binding|secondary metabolite biosynthetic process|oxidation-reduction process|defense response to other organism
AT3G26220	1.96411	4.62837e-48	2.42008e-46	12.3154	13.8404	14.1765	3.08774	3.9798	4.02443	CYP71B3	Cytochrome P450 71B3 [Source:UniProtKB/Swiss-Prot;Acc:O65785]	iron ion binding|membrane|integral component of membrane|oxidoreductase activity, acting on paired donors, with incorporation or reduction of molecular oxygen, NAD(P)H as one donor, and incorporation of one atom of oxygen|oxygen binding|heme binding|secondary metabolite biosynthetic process|oxidation-reduction process|defense response to other organism
AT3G26230	2.40893	1.69367e-51	9.86922e-50	9.4674	9.70904	11.0921	1.85722	1.82973	2.40201	CYP71B24	Cytochrome P450 71B24 [Source:UniProtKB/Swiss-Prot;Acc:Q9LTL8]	iron ion binding|membrane|integral component of membrane|oxidoreductase activity, acting on paired donors, with incorporation or reduction of molecular oxygen, NAD(P)H as one donor, and incorporation of one atom of oxygen|oxygen binding|heme binding|secondary metabolite biosynthetic process|oxidation-reduction process|defense response to other organism
AT3G26320	2.10663	3.55716e-22	7.26473e-21	5.12437	4.58715	4.84503	1.35188	1.28073	0.894392	CYP71B36	Cytochrome P450 71B36 [Source:UniProtKB/Swiss-Prot;Acc:Q9LIP4]	iron ion binding|chloroplast|membrane|integral component of membrane|oxidoreductase activity, acting on paired donors, with incorporation or reduction of molecular oxygen, NAD(P)H as one donor, and incorporation of one atom of oxygen|oxygen binding|heme binding|secondary metabolite biosynthetic process|oxidation-reduction process
AT3G26500	1.73144	3.62317e-25	8.59036e-24	10.0237	11.6315	12.3092	5.07155	2.94768	3.33566	PIRL2	Plant intracellular Ras-group-related LRR protein 2 [Source:UniProtKB/Swiss-Prot;Acc:Q9LRV8]	cellular_component|biological_process
AT3G26590	1.28823	8.96983e-27	2.28389e-25	17.8531	19.2732	19.49	9.65216	7.69155	7.09196		MATE efflux family protein [Source:TAIR;Acc:AT3G26590]	transporter activity|plasma membrane|antiporter activity|membrane|integral component of membrane|vacuole|vacuolar membrane
AT3G26600	1.41257	5.59485e-28	1.50125e-26	11.0939	11.3766	11.3075	4.98661	4.47708	4.14656	ARO4	armadillo repeat only 4 [Source:TAIR;Acc:AT3G26600]	nucleus|cytoplasm|biological_process|plasmodesma
AT3G26690	1.05995	2.2994e-17	3.52278e-16	18.9759	18.0813	16.5596	10.6836	8.86646	10.104	NUDT13	Nudix hydrolase 13, mitochondrial [Source:UniProtKB/Swiss-Prot;Acc:Q52K88]
AT3G26820	2.6014	0.0373541	0.0841445	0.0254347	0.0250876	0.0522596	0	0	0.0253162		Esterase/lipase/thioesterase family protein [Source:TAIR;Acc:AT3G26820]	catalytic activity|mitochondrion
AT3G26830	6.23733	2.05608e-170	7.0829e-168	38.3724	32.8555	39.8478	0.773329	0.341894	0.452724	CYP71B15	Bifunctional dihydrocamalexate synthase/camalexin synthase [Source:UniProtKB/Swiss-Prot;Acc:Q9LW27]
AT3G26840	1.82803	1.72607e-45	8.42359e-44	15.0077	14.9693	16.9409	4.61411	3.70482	5.9616		Acyltransferase-like protein At3g26840, chloroplastic [Source:UniProtKB/Swiss-Prot;Acc:Q9LW26]
AT3G26980	1.04181	1.25906e-18	2.0873e-17	29.6425	31.4393	31.4986	14.4772	16.0047	17.5387	MUB4	Membrane-anchored ubiquitin-fold protein 4 [Source:UniProtKB/Swiss-Prot;Acc:Q9LSD8]	molecular_function|plasma membrane
AT3G27070	1.39274	0.000718462	0.00252626	0.703966	0.697402	0.981515	0.498982	0.380034	0.321674	TOM20-1	Mitochondrial import receptor subunit TOM20-1 [Source:UniProtKB/Swiss-Prot;Acc:P82872]	mitochondrion|mitochondrial outer membrane translocase complex|integral component of membrane|protein import into mitochondrial outer membrane|mitochondrial inner membrane presequence translocase complex|protein targeting to mitochondrion|P-P-bond-hydrolysis-driven protein transmembrane transporter activity
AT3G27400	1.32619	1.93855e-11	1.86721e-10	4.6276	4.78192	4.94403	1.85122	2.05649	2.0306		Putative pectate lyase 11 [Source:UniProtKB/Swiss-Prot;Acc:Q9LTZ0]	extracellular region|pectate lyase activity|pectin catabolic process|metal ion binding
AT3G27473	2.24178	0.00424036	0.0125338	0.219254	0.656262	0.427669	0	0.164576	0.0816667		Cysteine/Histidine-rich C1 domain family protein [Source:TAIR;Acc:AT3G27473]	nucleus|zinc ion binding|intracellular signal transduction
AT3G27950	3.39181	1.73699e-08	1.25738e-07	1.20449	2.03885	2.05344	0.206341	0.103415	0		GDSL-like Lipase/Acylhydrolase superfamily protein [Source:TAIR;Acc:AT3G27950]	extracellular region|carboxylic ester hydrolase activity
AT3G28220	2.98967	6.27266e-63	4.93077e-61	68.6199	60.3656	57.1466	8.46743	8.58056	7.44668		TRAF-like family protein [Source:TAIR;Acc:AT3G28220]	cytoplasm|integral component of membrane|chloroplast envelope|vacuole
AT3G28415	Inf	0.0296844	0.0691346	0.0124884	0.03726	0.0258765	0	0	0	ABCB22	ABC transporter family protein [Source:TAIR;Acc:AT3G28415]	auxin efflux|auxin efflux transmembrane transporter activity|basipetal auxin transport|acropetal auxin transport|integral component of membrane|ATPase activity, coupled to transmembrane movement of substances|transmembrane transport|plasma membrane|membrane
AT3G28480	1.5453	2.18914e-37	8.24446e-36	16.6384	16.9078	19.5014	6.33018	6.40313	6.79939	P4H7	Probable prolyl 4-hydroxylase 7 [Source:UniProtKB/Swiss-Prot;Acc:Q8L970]	procollagen-proline 4-dioxygenase activity|iron ion binding|extracellular region|endoplasmic reticulum membrane|integral component of membrane|oxidoreductase activity, acting on paired donors, with incorporation or reduction of molecular oxygen|oxidoreductase activity, acting on paired donors, with incorporation or reduction of molecular oxygen, 2-oxoglutarate as one donor, and incorporation of o…
AT3G28510	Inf	1.47142e-70	1.40686e-68	3.25206	2.8552	3.08255	0	0	0		P-loop containing nucleoside triphosphate hydrolases superfamily protein [Source:TAIR;Acc:AT3G28510]	ATP binding|plasma membrane|integral component of membrane|ATPase activity|endoplasmic reticulum
AT3G28540	5.1116	1.32212e-52	7.96159e-51	6.60447	7.93608	9.44255	0.251975	0.164594	0.306865		P-loop containing nucleoside triphosphate hydrolases superfamily protein [Source:TAIR;Acc:AT3G28540]	ATP binding|plasma membrane|integral component of membrane|ATPase activity
AT3G28580	7.2324	2.27561e-40	9.55308e-39	10.9297	12.5168	16.9374	0.0928983	0.0239324	0.168893		P-loop containing nucleoside triphosphate hydrolases superfamily protein [Source:TAIR;Acc:AT3G28580]	ATP binding|plasma membrane|integral component of membrane|ATPase activity|response to abscisic acid|endoplasmic reticulum|response to singlet oxygen
AT3G28600	8.96274	6.19709e-24	1.38783e-22	3.63055	2.90011	5.02259	0.0285782	0	0		P-loop containing nucleoside triphosphate hydrolases superfamily protein [Source:TAIR;Acc:AT3G28600]	ATP binding|plasma membrane|ATPase activity|response to salt stress
AT3G28650	1.68469	0.0011437	0.00384655	0.682046	0.445363	0.554146	0.23687	0.148029	0.0888486		Cysteine/Histidine-rich C1 domain family protein [Source:TAIR;Acc:AT3G28650]	nucleus|zinc ion binding|intracellular signal transduction|protein-disulfide reductase activity|oxidation-reduction process
AT3G28890	4.31512	2.32038e-05	0.000108234	0.244391	0.193078	0.375674	0	0.048585	0	AtRLP43	receptor like protein 43 [Source:TAIR;Acc:AT3G28890]
AT3G28930	4.7438	9.08406e-231	6.25865e-228	132.695	140.547	154.28	6.40375	4.69802	5.18889	AIG2	Protein AIG2 [Source:UniProtKB/Swiss-Prot;Acc:P54121]	nucleus|transferase activity, transferring acyl groups|cytosol|response to bacterium
AT3G28940	1.57269	3.88516e-76	4.27277e-74	457.277	425.92	424.47	175.302	136.97	156.228		AIG2-like (avirulence induced gene) family protein [Source:TAIR;Acc:AT3G28940]	molecular_function|nucleus|chloroplast|plasma membrane|cytosol
AT3G29590	2.46191	0.000185039	0.000734668	1.53929	0.973157	0.790332	0.0401379	0.520308	0.122686	5MAT	Malonyl-CoA:anthocyanidin 5-O-glucoside-6''-O-malonyltransferase [Source:UniProtKB/Swiss-Prot;Acc:Q9LJB4]
AT3G29639	1.20827	0.0170281	0.0426842	0.63806	0.63586	1.32763	0.312968	0.473077	0.315372		BEST Arabidopsis thaliana protein match is: SPOC domain / Transcription elongation factor S-II protein (TAIR:AT5G11430.1); Has 45 Blast hits to 45 proteins in 8 species: Archae - 0; Bacteria - 0; Metazoa - 0; Fungi - 0; Plants - 45; Viruses - 0; Oth /.../aryotes - 0 (source: NCBI BLink). [Source:TAIR;Acc:AT3G29639]	mitochondrion
AT3G30340	1.3447	0.0359296	0.0814132	2.06208	0.785777	1.31389	0.569644	0.438238	0.572345		WAT1-related protein At3g30340 [Source:UniProtKB/Swiss-Prot;Acc:Q9LI65]
AT3G30720	5.61323	5.0453e-185	1.90623e-182	48.0614	45.0945	48.6716	1.57122	1.19186	0.271306	QQS	Protein QQS [Source:UniProtKB/Swiss-Prot;Acc:Q3E7K4]	molecular_function|mitochondrion|cytosol|starch biosynthetic process|protein binding|nucleus|positive regulation of protein metabolic process|negative regulation of starch metabolic process
AT3G42725	1.40332	0.024376	0.0583316	1.00273	0.977574	1.69954	0.402313	0.497593	0.587402		Putative membrane lipoprotein [Source:TAIR;Acc:AT3G42725]	molecular_function|biological_process|integral component of membrane
AT3G43250	Inf	7.28814e-13	8.07209e-12	0.908513	1.25358	2.81953	0	0	0		Family of unknown function (DUF572) [Source:TAIR;Acc:AT3G43250]	molecular_function|nucleus|biological_process
AT3G44300	3.51508	1.41225e-29	4.07914e-28	75.0405	83.2884	106.494	8.48755	8.73936	7.48533	NIT2	Nitrilase 2 [Source:UniProtKB/Swiss-Prot;Acc:P32962]	plasma membrane|response to bacterium|nitrilase activity|indole-3-acetonitrile nitrile hydratase activity|response to cadmium ion|cytosol|indole-3-acetonitrile nitrilase activity|indoleacetic acid biosynthetic process
AT3G44310	2.20357	6.16595e-154	1.85176e-151	1313.73	1329.45	1369.82	325.169	296.458	316.672	NIT1	Nitrilase 1 [Source:UniProtKB/Swiss-Prot;Acc:P32961]	plasma membrane|nitrogen compound metabolic process|hydrolase activity, acting on carbon-nitrogen (but not peptide) bonds|nitrilase activity|indole-3-acetonitrile nitrile hydratase activity|chloroplast|apoplast|cytosol|plasmodesma|indole-3-acetonitrile nitrilase activity|indoleacetic acid biosynthetic process
AT3G44350	5.50771	5.82794e-07	3.48086e-06	0.441195	0.602643	1.00443	0	0	0.0743548	NAC061	Putative NAC domain-containing protein 61 [Source:UniProtKB/Swiss-Prot;Acc:Q9M290]	DNA binding|nucleus|transcription, DNA-templated|regulation of transcription, DNA-templated|multicellular organism development|transcription factor activity, sequence-specific DNA binding|response to chitin
AT3G44400	1.40725	2.97727e-25	7.08045e-24	4.94458	5.33416	5.32163	2.55875	1.84916	1.87031		Disease resistance protein (TIR-NBS-LRR class) family [Source:TAIR;Acc:AT3G44400]	ATP binding|cytoplasm|defense response|signal transduction|ADP binding
AT3G44720	1.59105	9.47974e-29	2.64361e-27	62.5133	63.7612	76.4535	23.8541	23.174	24.0798	ADT4	Arogenate dehydratase 4, chloroplastic [Source:UniProtKB/Swiss-Prot;Acc:O22241]	prephenate dehydratase activity|L-phenylalanine biosynthetic process|chloroplast|chloroplast stroma|amino acid binding|arogenate dehydratase activity|response to karrikin
AT3G44830	3.67308	0.000101834	0.000422655	0.208505	0.232789	0.335303	0	0	0.0466623	PDAT2	Putative phospholipid:diacylglycerol acyltransferase 2 [Source:UniProtKB/Swiss-Prot;Acc:Q9FYC7]	phosphatidylcholine-sterol O-acyltransferase activity|glycerol metabolic process|lipid metabolic process|O-acyltransferase activity|chloroplast|integral component of membrane|phospholipid:diacylglycerol acyltransferase activity
AT3G44860	8.00777	0	0	172.185	181.035	198.29	0.746532	1.0725	0.496373	FAMT	farnesoic acid carboxyl-O-methyltransferase [Source:TAIR;Acc:AT3G44860]	S-adenosylmethionine-dependent methyltransferase activity|chloroplast|methylation|farnesoic acid O-methyltransferase activity
AT3G44870	3.68113	1.16013e-13	1.37183e-12	6.95786	7.93113	4.47096	0.341917	0.497555	0.797427		S-adenosyl-L-methionine-dependent methyltransferases superfamily protein [Source:TAIR;Acc:AT3G44870]	methyltransferase activity|S-adenosylmethionine-dependent methyltransferase activity|integral component of membrane|methylation
AT3G44880	1.1384	2.54198e-32	8.12357e-31	49.0687	51.3136	56.448	23.3165	27.202	25.0567	PAO	Pheophorbide a oxygenase, chloroplastic [Source:UniProtKB/Swiss-Prot;Acc:Q9FYC2]
AT3G44970	1.22042	1.43451e-09	1.16679e-08	23.9536	19.8305	19.7009	12.6485	7.22287	7.96923		Cytochrome P450 superfamily protein [Source:TAIR;Acc:AT3G44970]	iron ion binding|oxidoreductase activity, acting on paired donors, with incorporation or reduction of molecular oxygen|oxygen binding|heme binding|oxidation-reduction process
AT3G45060	2.39262	1.25788e-05	6.1786e-05	0.792884	0.581868	0.663251	0.0911088	0.303745	0.0611022	NRT2.6	High affinity nitrate transporter 2.6 [Source:UniProtKB/Swiss-Prot;Acc:Q9LXH0]	plasma membrane|nitrate transmembrane transporter activity|nitrate transport|integral component of membrane|nitrate assimilation|transmembrane transport|chloroplast|response to karrikin
AT3G45130	1.65772	8.64239e-11	7.8377e-10	0.869411	1.27042	1.2518	0.517005	0.338749	0.390487	LAS1	Lanosterol synthase [Source:UniProtKB/Swiss-Prot;Acc:Q1G1A4]	nucleus|pentacyclic triterpenoid biosynthetic process|lanosterol synthase activity
AT3G45140	5.35641	3.67466e-220	2.15197e-217	440.837	494.902	534.413	16.4022	10.9826	10.7851	LOX2	Lipoxygenase 2, chloroplastic [Source:UniProtKB/Swiss-Prot;Acc:P38418]	chloroplast|oxylipin biosynthetic process|metal ion binding|protein binding|cytoplasm|response to wounding|response to herbivore|chloroplast envelope|chloroplast thylakoid membrane|response to jasmonic acid|chloroplast stroma|response to bacterium|linoleate 13S-lipoxygenase activity|response to fungus|lipid oxidation|jasmonic acid biosynthetic process|response to water deprivation|response to oth…
AT3G45620	1.56342	1.07369e-42	4.80902e-41	17.1095	17.4673	20.8966	6.82504	7.27382	6.83118		Transducin/WD40 repeat-like superfamily protein [Source:TAIR;Acc:AT3G45620]	nucleotide binding|nucleus|cytoplasm|biological_process|protein binding|Cul4-RING E3 ubiquitin ligase complex
AT3G45640	1.44268	2.17193e-39	8.72685e-38	149.161	144.526	154.622	48.6993	51.1234	68.3061	MPK3	Mitogen-activated protein kinase 3 [Source:UniProtKB/Swiss-Prot;Acc:Q39023]	MAP kinase activity|ATP binding|nucleus|cytoplasm|plant-type hypersensitive response|kinase activity|response to oxidative stress|signal transduction|activation of MAPK activity involved in osmosensory signaling pathway|response to osmotic stress|protein kinase activity|abscisic acid-activated signaling pathway|protein binding|response to chitin|regulation of stomatal complex patterning|regulatio…
AT3G45660	2.85561	4.34492e-29	1.23669e-27	3.1472	3.67517	4.12034	0.598593	0.466725	0.601427	NPF2.6	Protein NRT1/ PTR FAMILY 2.6 [Source:UniProtKB/Swiss-Prot;Acc:Q9M1E1]	transporter activity|plasma membrane|transport|oligopeptide transport|membrane|integral component of membrane|nitrate assimilation
AT3G45860	4.77781	1.25152e-55	8.25825e-54	3.48327	3.00705	3.75776	0.0743528	0.227033	0.0761172	CRK4	Cysteine-rich receptor-like protein kinase 4 [Source:UniProtKB/Swiss-Prot;Acc:Q9LZU4]	protein serine/threonine kinase activity|ATP binding|extracellular region|plasma membrane|protein phosphorylation|plasmodesma|integral component of membrane|kinase activity|defense response|response to salicylic acid|programmed cell death|defense response to bacterium
AT3G46070	Inf	0.0294671	0.0687585	0.386649	0.271805	0.551142	0	0	0		C2H2-type zinc finger family protein [Source:TAIR;Acc:AT3G46070]	nucleic acid binding|nucleus|zinc ion binding|metal ion binding|transcription factor activity, sequence-specific DNA binding|regulation of transcription, DNA-templated
AT3G46080	2.58997	8.90093e-26	2.16067e-24	12.9193	11.3062	10.6001	2.3558	1.4829	2.02453	ZAT8	Zinc finger protein ZAT8 [Source:UniProtKB/Swiss-Prot;Acc:Q9LX85]	nucleic acid binding|nucleus|transcription, DNA-templated|zinc ion binding|metal ion binding|transcription factor activity, sequence-specific DNA binding|regulation of transcription, DNA-templated|response to chitin
AT3G46090	1.64466	1.98286e-22	4.12142e-21	19.954	17.6494	20.6179	5.51577	6.48598	7.49188	ZAT7	Zinc finger protein ZAT7 [Source:UniProtKB/Swiss-Prot;Acc:Q42453]	nucleic acid binding|transcription factor activity, sequence-specific DNA binding|nucleus|transcription, DNA-templated|zinc ion binding|sequence-specific DNA binding|transcription regulatory region DNA binding|metal ion binding|regulation of transcription, DNA-templated|negative regulation of growth|regulation of response to stress|response to chitin
AT3G46110	3.25125	4.821e-44	2.22307e-42	8.35248	8.31683	10.6464	1.24489	0.64466	1.3438		Domain of unknown function (DUF966) [Source:TAIR;Acc:AT3G46110]	nucleus|plasma membrane
AT3G46190	Inf	5.30331e-06	2.74906e-05	0.318077	0.253958	0.460211	0	0	0		TRAF-like family protein [Source:TAIR;Acc:AT3G46190]	molecular_function|cytoplasm|biological_process
AT3G46230	1.29599	0.00629752	0.0177606	1.33395	1.76426	1.35411	0.311378	0.982679	0.62853	HSP17.4A	17.4 kDa class I heat shock protein [Source:UniProtKB/Swiss-Prot;Acc:P19036]
AT3G46280	2.91212	6.11686e-24	1.37248e-22	71.3785	89.7735	102.958	14.5423	13.1442	10.244		protein kinase-related [Source:TAIR;Acc:AT3G46280]	extracellular region|integral component of membrane|kinase activity|phosphorylation
AT3G46330	3.82534	1.47778e-09	1.20073e-08	0.513205	1.12225	0.951862	0.0160007	0.11461	0.0494925	MEE39	Probable LRR receptor-like serine/threonine-protein kinase MEE39 [Source:UniProtKB/Swiss-Prot;Acc:C0LGP2]	protein serine/threonine kinase activity|ATP binding|plasma membrane|protein phosphorylation|integral component of membrane|kinase activity|embryo development ending in seed dormancy|endosperm development
AT3G46660	3.15588	2.67068e-12	2.79539e-11	0.892721	1.13749	1.36864	0.0521738	0.209612	0.105847	UGT76E12	UDP-glycosyltransferase 76E12 [Source:UniProtKB/Swiss-Prot;Acc:Q94AB5]	UDP-glycosyltransferase activity|flavonoid biosynthetic process|transferase activity, transferring glycosyl groups|intracellular membrane-bounded organelle|flavonol 3-O-glucosyltransferase activity|flavonoid glucuronidation|quercetin 3-O-glucosyltransferase activity|quercetin 7-O-glucosyltransferase activity
AT3G46690	1.14742	1.08054e-07	7.12403e-07	6.50285	8.61836	9.73009	3.31746	4.00799	4.48899	UGT76E4	UDP-glycosyltransferase 76E4 [Source:UniProtKB/Swiss-Prot;Acc:Q9STE3]	UDP-glycosyltransferase activity|transferase activity, transferring glycosyl groups
AT3G47050	5.98672	1.51587e-09	1.2304e-08	0.354807	0.355283	0.417684	0	0	0		Glycosyl hydrolase family protein [Source:TAIR;Acc:AT3G47050]	hydrolase activity, hydrolyzing O-glycosyl compounds|extracellular region|carbohydrate metabolic process|vacuole
AT3G47090	3.68957	1.26669e-16	1.84576e-15	0.878405	0.690672	0.829722	0.0350183	0.0535105	0.035818		Leucine-rich repeat protein kinase family protein [Source:TAIR;Acc:AT3G47090]	protein serine/threonine kinase activity|ATP binding|plasma membrane|protein phosphorylation|transmembrane receptor protein tyrosine kinase signaling pathway|integral component of membrane|kinase activity|chloroplast
AT3G47380	2.72919	1.42251e-28	3.92489e-27	16.3498	17.3323	22.9781	3.147	3.35464	2.59868		Plant invertase/pectin methylesterase inhibitor superfamily protein [Source:TAIR;Acc:AT3G47380]	extracellular region|negative regulation of catalytic activity|pectinesterase inhibitor activity
AT3G47480	7.78256	8.56724e-190	3.46013e-187	54.09	49.0835	60.9244	0.237866	0.121862	0.375494	CML47	Probable calcium-binding protein CML47 [Source:UniProtKB/Swiss-Prot;Acc:Q9SN89]	calcium ion binding|plasma membrane|biological_process
AT3G47540	2.84712	8.0086e-76	8.68526e-74	28.4255	28.6294	33.3777	5.20483	4.04353	4.06037		Chitinase family protein [Source:TAIR;Acc:AT3G47540]	chitinase activity|extracellular region|carbohydrate metabolic process|chitin catabolic process|cell wall macromolecule catabolic process
AT3G47570	1.1337	4.19421e-15	5.53517e-14	9.92311	7.84128	8.94828	3.85308	4.28837	4.77532		Probable LRR receptor-like serine/threonine-protein kinase At3g47570 [Source:UniProtKB/Swiss-Prot;Acc:C0LGP4]	protein serine/threonine kinase activity|ATP binding|protein phosphorylation|transmembrane receptor protein tyrosine kinase signaling pathway|integral component of membrane|kinase activity|plasma membrane
AT3G47800	1.40237	6.80293e-43	3.07642e-41	39.409	40.9897	43.925	14.6963	17.015	17.7626		Galactose mutarotase-like superfamily protein [Source:TAIR;Acc:AT3G47800]	aldose 1-epimerase activity|cytoplasm|galactose metabolic process|hexose metabolic process|carbohydrate binding
AT3G47830	1.07895	0.00656617	0.0184371	0.977468	2.11215	1.80027	0.637354	0.715585	0.852		Putative DNA glycosylase At3g47830 [Source:UniProtKB/Swiss-Prot;Acc:F4JCQ3]	nucleus|base-excision repair|hydrolase activity, acting on glycosyl bonds
AT3G48080	2.14891	1.6082e-23	3.50765e-22	3.76892	4.50258	5.164	1.07901	1.04928	1.07734	EDS1B	Protein EDS1B [Source:UniProtKB/Swiss-Prot;Acc:Q9SU71]	triglyceride lipase activity|signal transducer activity|nucleus|cytoplasm|lipid metabolic process|defense response|lipase activity|hydrolase activity
AT3G48090	1.79799	1.0537e-31	3.28232e-30	42.2901	44.2853	53.2858	14.1141	13.2402	14.6023	EDS1	Protein EDS1 [Source:UniProtKB/Swiss-Prot;Acc:Q9SU72]	triglyceride lipase activity|endoplasmic reticulum|lipid metabolic process|defense response|chloroplast|signal transducer activity|systemic acquired resistance, salicylic acid mediated signaling pathway|lipase activity|protein binding|protein homodimerization activity|nucleus|cytoplasm|response to singlet oxygen|systemic acquired resistance|plant-type hypersensitive response|response to hypoxia|r…
AT3G48320	1.04487	3.67541e-12	3.79782e-11	7.27842	8.85878	7.95292	4.96234	3.93056	3.57516	CYP71A21	Cytochrome P450 71A21 [Source:UniProtKB/Swiss-Prot;Acc:Q9STL2]	iron ion binding|membrane|integral component of membrane|oxidoreductase activity, acting on paired donors, with incorporation or reduction of molecular oxygen, NAD(P)H as one donor, and incorporation of one atom of oxygen|oxygen binding|heme binding|secondary metabolite biosynthetic process|oxidation-reduction process
AT3G48580	1.17518	0.0031633	0.00962402	1.60511	2.98493	3.03686	1.15603	1.55439	1.01567	XTH11	Probable xyloglucan endotransglucosylase/hydrolase protein 11 [Source:UniProtKB/Swiss-Prot;Acc:Q9SMP1]	hydrolase activity, hydrolyzing O-glycosyl compounds|cell wall|xyloglucan metabolic process|xyloglucan:xyloglucosyl transferase activity|hydrolase activity, acting on glycosyl bonds|cell wall biogenesis|apoplast|cell wall organization
AT3G48630	Inf	2.6595e-12	2.78493e-11	0	0	0	0	0	0		unknown protein; BEST Arabidopsis thaliana protein match is: unknown protein (TAIR:AT3G44150.1); Has 64 Blast hits to 64 proteins in 15 species: Archae - 0; Bacteria - 0; Metazoa - 0; Fungi - 0; Plants - 64; Viruses - 0; Other Eukaryotes - 0 (source /.../ BLink). [Source:TAIR;Acc:AT3G48630]	molecular_function|cellular_component|biological_process
AT3G48640	4.86285	9.88766e-25	2.31156e-23	3.59021	2.96759	4.40441	0.0894003	0.4492	0.0900596		unknown protein; FUNCTIONS IN: molecular_function unknown; INVOLVED IN: biological_process unknown; LOCATED IN: endomembrane system; EXPRESSED IN: 10 plant structures; EXPRESSED DURING: 10 growth stages; CONTAINS InterPro DOMAIN/s: Protein of unknow /.../tion DUF677 (InterPro:IPR007749); BEST Arabidopsis thaliana protein match is: Protein of unknown function (DUF677) (TAIR:AT5G66670.2); Has 42 Bl…	molecular_function|biological_process|integral component of membrane
AT3G48850	3.25315	0.000494036	0.00180065	0.604638	0.523208	1.16388	0.200821	0.0802575	0	MPT2	Mitochondrial phosphate carrier protein 2, mitochondrial [Source:UniProtKB/Swiss-Prot;Acc:Q9M2Z8]
AT3G49110	5.37895	1.29468e-54	8.28629e-53	138.07	99.6108	118.244	2.98676	2.69592	3.12165	PER33	Peroxidase 33 [Source:UniProtKB/Swiss-Prot;Acc:P24101]
AT3G49120	1.43822	1.58087e-26	3.9564e-25	198.774	208.62	238.814	77.8874	86.068	89.528	PER34	Peroxidase 34 [Source:UniProtKB/Swiss-Prot;Acc:Q9SMU8]
AT3G49620	5.51533	7.77308858944741e-311	1.13803e-307	127.95	134.351	144.331	3.63373	2.8014	3.03388	DIN11	Probable 2-oxoglutarate-dependent dioxygenase DIN11 [Source:UniProtKB/Swiss-Prot;Acc:Q8H113]	iron ion binding|cytoplasm|oxidoreductase activity|dioxygenase activity|oxidation-reduction process|cellular response to starvation|aging
AT3G50010	2.12816	1.94091e-10	1.70603e-09	1.72874	2.43094	2.73656	0.427484	0.67268	0.545444		Cysteine/Histidine-rich C1 domain family protein [Source:TAIR;Acc:AT3G50010]	nucleus
AT3G50140	1.65053	2.47261e-14	3.076e-13	3.59823	3.30784	3.6675	1.17612	1.29163	1.34147		Plant protein of unknown function (DUF247) [Source:TAIR;Acc:AT3G50140]	plasma membrane|biological_process|integral component of membrane
AT3G50170	3.13108	0.0262177	0.0621655	0.075345	0.175795	0.156341	0.0246858	0.0247463	0		Plant protein of unknown function (DUF247) [Source:TAIR;Acc:AT3G50170]	molecular_function|plasma membrane|biological_process|integral component of membrane
AT3G50180	4.15795	0.00767394	0.0211747	0.13585	0.190336	0.112284	0	0	0.0272152		Plant protein of unknown function (DUF247) [Source:TAIR;Acc:AT3G50180]	plasma membrane|biological_process|integral component of membrane
AT3G50190	1.23688	0.000101097	0.00041997	1.539	1.77361	1.05184	0.617097	0.614087	0.590888		Plant protein of unknown function (DUF247) [Source:TAIR;Acc:AT3G50190]	plasma membrane|biological_process|integral component of membrane
AT3G50200	1.6072	0.00190663	0.00609815	0.933018	0.889634	1.19104	0.333841	0.329232	0.202942		Plant protein of unknown function (DUF247) [Source:TAIR;Acc:AT3G50200]	molecular_function|nucleus|biological_process
AT3G50260	1.17674	5.68993e-11	5.27659e-10	10.4169	12.3012	12.8488	5.79214	4.77926	6.15381	ERF011	Ethylene-responsive transcription factor ERF011 [Source:UniProtKB/Swiss-Prot;Acc:Q9SNE1]
AT3G50270	1.25188	1.85451e-21	3.62923e-20	26.2507	22.7016	21.8808	11.513	9.46305	10.6346		HXXXD-type acyl-transferase family protein [Source:TAIR;Acc:AT3G50270]	chloroplast|transferase activity|transferase activity, transferring acyl groups other than amino-acyl groups
AT3G50280	1.51294	6.98019e-09	5.27795e-08	5.23316	4.39287	3.93082	2.34884	1.38289	1.31887		Uncharacterized acetyltransferase At3g50280 [Source:UniProtKB/Swiss-Prot;Acc:Q9SND9]	cytoplasm|transferase activity|transferase activity, transferring acyl groups other than amino-acyl groups
AT3G50460	Inf	2.26044e-06	1.24152e-05	0.375552	0.661469	0.873504	0	0	0	HR2	RPW8-like protein 2 [Source:UniProtKB/Swiss-Prot;Acc:Q9SCS8]	molecular_function|chloroplast|plant-type hypersensitive response|integral component of membrane|response to other organism|response to fungus
AT3G50470	2.34272	1.25505e-29	3.62959e-28	9.99234	12.6822	13.0068	2.5896	2.2877	1.88779	HR3	RPW8-like protein 3 [Source:UniProtKB/Swiss-Prot;Acc:Q9SCS7]	molecular_function|plant-type hypersensitive response|integral component of membrane|response to other organism|response to fungus
AT3G50480	4.31656	3.28365e-116	6.51859e-114	267.99	299.271	333.047	12.4318	11.7344	15.8736	HR4	RPW8-like protein 4 [Source:UniProtKB/Swiss-Prot;Acc:Q9SCS6]	molecular_function|chloroplast|plant-type hypersensitive response|integral component of membrane|response to other organism|response to fungus|response to external biotic stimulus|response to symbiotic bacterium|response to symbiotic fungus|response to bacterium|response to ethylene|response to salicylic acid|response to jasmonic acid
AT3G50740	1.34566	8.28978e-52	4.90374e-50	105.208	105.584	107.616	46.1041	40.5268	46.4074	UGT72E1	UDP-glycosyltransferase 72E1 [Source:UniProtKB/Swiss-Prot;Acc:Q94A84]	UDP-glycosyltransferase activity|response to toxic substance|flavonoid biosynthetic process|transferase activity, transferring glycosyl groups|intracellular membrane-bounded organelle|flavonoid glucuronidation|quercetin 3-O-glucosyltransferase activity|quercetin 7-O-glucosyltransferase activity|lignin metabolic process|coniferyl-alcohol glucosyltransferase activity
AT3G50760	3.49959	3.81442e-60	2.8187e-58	12.8501	13.9536	15.6092	1.52705	0.986781	1.34702	GATL2	Probable galacturonosyltransferase-like 2 [Source:UniProtKB/Swiss-Prot;Acc:Q9S7G2]	Golgi membrane|polysaccharide biosynthetic process|Golgi apparatus|integral component of membrane|carbohydrate biosynthetic process|transferase activity, transferring glycosyl groups|transferase activity, transferring hexosyl groups|pectin biosynthetic process|cell wall organization|polygalacturonate 4-alpha-galacturonosyltransferase activity
AT3G50770	6.443	5.93077e-190	2.43734e-187	65.5299	68.2939	78.8403	0.849191	0.575871	1.11213	CML41	Probable calcium-binding protein CML41 [Source:UniProtKB/Swiss-Prot;Acc:Q8L3R2]	calcium ion binding|biological_process
AT3G50900	1.59676	5.95058e-29	1.67539e-27	34.4004	40.0232	39.3684	13.7573	12.9269	13.1828		unknown protein; BEST Arabidopsis thaliana protein match is: unknown protein (TAIR:AT5G66490.1); Has 45 Blast hits to 45 proteins in 7 species: Archae - 0; Bacteria - 0; Metazoa - 0; Fungi - 0; Plants - 45; Viruses - 0; Other Eukaryotes - 0 (source: /.../BLink). [Source:TAIR;Acc:AT3G50900]	molecular_function|mitochondrion|biological_process
AT3G50930	3.80096	1.61569e-45	7.90138e-44	28.48	28.2122	36.778	2.00306	1.88468	3.15069	BCS1	cytochrome BC1 synthesis [Source:TAIR;Acc:AT3G50930]	ATP binding|plasma membrane|integral component of membrane|ATPase activity|response to bacterium|plant-type hypersensitive response|mitochondrion|response to molecule of bacterial origin|mitochondrial envelope|mitochondrial outer membrane|cell death|response to UV|salicylic acid mediated signaling pathway|identical protein binding
AT3G50950	1.81934	1.14227e-75	1.22741e-73	56.7094	56.5718	63.6654	17.4095	15.8073	19.9324	RPP13L4	Disease resistance RPP13-like protein 4 [Source:UniProtKB/Swiss-Prot;Acc:Q38834]
AT3G51430	2.18635	1.27788e-85	1.63575e-83	40.7232	43.5254	45.0197	9.50333	9.34586	11.0923	SSL5	Protein STRICTOSIDINE SYNTHASE-LIKE 5 [Source:UniProtKB/Swiss-Prot;Acc:Q9CAZ7]
AT3G51440	1.27967	1.35681e-16	1.96923e-15	11.8968	10.8831	11.2789	4.16073	5.60194	5.18995	SSL6	Protein STRICTOSIDINE SYNTHASE-LIKE 6 [Source:UniProtKB/Swiss-Prot;Acc:Q9SD05]	extracellular region|vacuole|biosynthetic process|alkaloid biosynthetic process|strictosidine synthase activity|endoplasmic reticulum|response to wounding|response to virus|response to fungus|response to ethylene|response to salicylic acid|response to jasmonic acid
AT3G51450	4.61646	5.60331e-265	6.25036e-262	57.9703	58.0244	58.5346	3.23131	2.16261	2.35151	SSL7	Protein STRICTOSIDINE SYNTHASE-LIKE 7 [Source:UniProtKB/Swiss-Prot;Acc:Q9SD04]	vacuole|biosynthetic process|chloroplast|alkaloid biosynthetic process|strictosidine synthase activity|response to wounding|response to virus|response to fungus|response to ethylene|response to salicylic acid|response to jasmonic acid
AT3G51600	1.04024	6.1982e-25	1.46069e-23	811.685	924.338	858.04	396.304	433.661	519.47	LTP5	Non-specific lipid-transfer protein 5 [Source:UniProtKB/Swiss-Prot;Acc:Q9XFS7]	extracellular region|lipid binding|lipid transporter activity|lipid transport|cell wall|plasmodesma
AT3G51660	3.26654	3.69245e-106	6.50343e-104	55.0662	50.3481	52.4823	5.74294	4.92932	6.89033		Tautomerase/MIF superfamily protein [Source:TAIR;Acc:AT3G51660]	molecular_function|inflammatory response|response to other organism|peroxisome
AT3G51890	1.08234	5.08854e-17	7.63119e-16	17.1831	19.0398	19.6908	7.91798	9.63497	9.95512		Clathrin light chain 3 [Source:UniProtKB/Swiss-Prot;Acc:F4J5M9]
AT3G52400	1.63674	2.92372e-31	8.941e-30	40.0636	43.095	47.3122	13.5929	13.5093	18.0138	SYP122	Syntaxin-122 [Source:UniProtKB/Swiss-Prot;Acc:Q9SVC2]	SNARE binding|SNAP receptor activity|plasma membrane|intracellular protein transport|exocytosis|vesicle fusion|endomembrane system|integral component of membrane|SNARE complex|vesicle docking|membrane fusion|defense response to fungus|salicylic acid mediated signaling pathway|jasmonic acid mediated signaling pathway|regulation of plant-type hypersensitive response|negative regulation of programme…
AT3G52430	4.08885	1.37879e-55	9.0725e-54	47.5615	47.6066	60.1106	3.39879	3.12244	3.16577	PAD4	Lipase-like PAD4 [Source:UniProtKB/Swiss-Prot;Acc:Q9S745]	triglyceride lipase activity|nucleus|lipid metabolic process|plant-type hypersensitive response|ethylene-activated signaling pathway|lipid catabolic process|transferase activity|response to bacterium|response to salicylic acid|systemic acquired resistance, salicylic acid mediated signaling pathway|lipase activity|positive regulation of defense response to bacterium|positive regulation of camalexi…
AT3G52500	1.0232	1.8949e-30	5.62587e-29	86.5731	89.4905	91.9489	46.1696	48.1715	46.1365		Eukaryotic aspartyl protease family protein [Source:TAIR;Acc:AT3G52500]	extracellular region|proteolysis|cell wall|plant-type cell wall|membrane|cytosol
AT3G52770	1.48088	0.000116465	0.000478379	5.6013	4.46844	4.15241	2.30286	1.61004	1.05647	ZPR3	protein binding [Source:TAIR;Acc:AT3G52770]	transcription, DNA-templated|regulation of transcription, DNA-templated|protein binding|adaxial/abaxial axis specification|regulation of meristem growth|leaf vascular tissue pattern formation|leaf shaping|nucleus|meristem maintenance|negative regulation of sequence-specific DNA binding transcription factor activity
AT3G52870	2.14152	4.2074e-20	7.58141e-19	64.6883	70.8579	89.4198	20.773	15.3093	18.8529		IQ calmodulin-binding motif family protein [Source:TAIR;Acc:AT3G52870]	calmodulin binding|nucleus|cytoplasm|biological_process|chloroplast
AT3G53180	1.14698	1.71308e-37	6.52503e-36	48.699	50.0878	52.8188	25.694	24.4114	22.9779		glutamate-ammonia ligases;catalytics;glutamate-ammonia ligases [Source:TAIR;Acc:AT3G53180]
AT3G53200	1.78137	3.9459e-15	5.21924e-14	5.18392	6.01089	5.7771	1.23002	2.23584	1.65883	AtMYB27	myb domain protein 27 [Source:TAIR;Acc:AT3G53200]
AT3G54110	1.02111	4.16287e-27	1.07277e-25	65.7048	67.2495	72.1654	38.2858	34.5678	34.7247	PUMP1	Mitochondrial uncoupling protein 1 [Source:UniProtKB/Swiss-Prot;Acc:O81845]	structural constituent of ribosome|mitochondrion|mitochondrial inner membrane|translation|transport|mitochondrial transport|integral component of membrane|oxidative phosphorylation uncoupler activity|chloroplast|photorespiration|vacuolar membrane|plasmodesma
AT3G54120	1.02746	2.28725e-07	1.44769e-06	8.93484	8.24349	9.26285	5.06496	3.70311	4.06828	RTNLB12	Reticulon-like protein B12 [Source:UniProtKB/Swiss-Prot;Acc:Q9M392]	molecular_function|endoplasmic reticulum|endoplasmic reticulum membrane|biological_process|integral component of membrane
AT3G54150	4.60367	3.26754e-27	8.48581e-26	17.6212	19.0697	26.0473	1.00012	0.757809	1.06395		S-adenosyl-L-methionine-dependent methyltransferases superfamily protein [Source:TAIR;Acc:AT3G54150]
AT3G54420	2.09003	3.86502e-26	9.54037e-25	11.5029	12.9355	13.0265	4.17234	2.67925	2.50246	ATEP3	homolog of carrot EP3-3 chitinase [Source:TAIR;Acc:AT3G54420]
AT3G54600	1.38316	1.13302e-14	1.44796e-13	33.1378	30.845	29.6308	17.3605	8.309	13.075	DJ1F	DJ-1 protein homolog F [Source:UniProtKB/Swiss-Prot;Acc:Q9M1G8]
AT3G54640	2.0837	8.70317e-109	1.56824e-106	141.546	154.767	165.517	45.368	36.3457	36.0329	TSA1	Tryptophan synthase alpha chain, chloroplastic [Source:UniProtKB/Swiss-Prot;Acc:Q42529]	tryptophan biosynthetic process|nucleus|nuclear envelope|endoplasmic reticulum lumen|chloroplast|auxin biosynthetic process|pyridoxal phosphate binding|indole-3-glycerol-phosphate lyase activity|chloroplast thylakoid membrane|vacuole|calcium ion binding|protein binding|chloroplast stroma|peroxisome|defense response to bacterium|defense response by callose deposition in cell wall|defense response …
AT3G55130	2.5874	1.94568e-119	4.10609e-117	27.7264	26.7586	27.5236	3.98428	5.4116	5.28471	ABCG19	ABC transporter G family member 19 [Source:UniProtKB/Swiss-Prot;Acc:Q9M3D6]	ATP binding|vacuolar membrane|plasma membrane|integral component of membrane|ATPase activity, coupled to transmembrane movement of substances|vacuolar lumen|vacuolar transport|antibiotic transport
AT3G55240	1.35826	5.71509e-52	3.40652e-50	241.583	253.776	239.516	94.3566	96.3881	113.564		Plant protein 1589 of unknown function [Source:TAIR;Acc:AT3G55240]	molecular_function|chloroplast|developmental process
AT3G55290	1.40051	1.3087e-16	1.90451e-15	13.1075	12.6186	11.8447	4.9362	4.64476	4.76505		NAD(P)-binding Rossmann-fold superfamily protein [Source:TAIR;Acc:AT3G55290]
AT3G55310	1.41396	0.00414027	0.0122705	0.944988	1.23962	1.21602	0.393231	0.498214	0.56141		NAD(P)-binding Rossmann-fold superfamily protein [Source:TAIR;Acc:AT3G55310]	oxidoreductase activity|membrane
AT3G55500	2.49468	9.57176e-18	1.50684e-16	8.2654	8.90061	11.5285	1.64185	2.55425	1.36794	EXPA16	Expansin-A16 [Source:UniProtKB/Swiss-Prot;Acc:Q9M2S9]	extracellular region|cell wall|plant-type cell wall organization|unidimensional cell growth|plant-type cell wall loosening|plant-type cell wall modification involved in multidimensional cell growth|membrane|syncytium formation
AT3G55700	2.27031	0.00770506	0.0212467	0.310613	0.23382	0.24337	0.0768178	0.0780283	0.0261919	UGT76F1	UDP-glycosyltransferase 76F1 [Source:UniProtKB/Swiss-Prot;Acc:Q9M052]	nucleus|UDP-glycosyltransferase activity|transferase activity, transferring glycosyl groups
AT3G55970	4.9968	0	0	63.967	66.1974	69.6667	1.73364	2.26183	2.54304	ATJRG21	jasmonate-regulated gene 21 [Source:TAIR;Acc:AT3G55970]
AT3G56220	1.25199	0.000102388	0.000424428	3.32421	3.7351	2.43533	1.54748	1.8021	1.22509		transcription regulators [Source:TAIR;Acc:AT3G56220]	nucleus|protein dimerization activity
AT3G56260	1.72358	0.000271117	0.0010396	1.77918	1.30797	1.23975	0.558781	0.309109	0.370124		unknown protein; Has 20 Blast hits to 19 proteins in 11 species: Archae - 0; Bacteria - 0; Metazoa - 4; Fungi - 2; Plants - 10; Viruses - 0; Other Eukaryotes - 4 (source: NCBI BLink). [Source:TAIR;Acc:AT3G56260]	molecular_function|nucleus|mitochondrion|biological_process
AT3G56400	3.04372	3.16875e-75	3.38941e-73	106.597	103.484	121.936	12.3546	10.578	17.6579	WRKY70	Probable WRKY transcription factor 70 [Source:UniProtKB/Swiss-Prot;Acc:Q9LY00]	transcription factor activity, sequence-specific DNA binding|nucleus|transcription, DNA-templated|regulation of transcription, DNA-templated|sequence-specific DNA binding|response to jasmonic acid|systemic acquired resistance, salicylic acid mediated signaling pathway|induced systemic resistance, jasmonic acid mediated signaling pathway|defense response to bacterium|negative regulation of transcr…
AT3G56710	4.72499	2.6011e-39	1.03977e-37	17.4033	17.4705	22.9863	0.700485	0.687767	1.02553	SIB1	Sigma factor binding protein 1, chloroplastic [Source:UniProtKB/Swiss-Prot;Acc:Q9LDH1]	nucleus|protein binding|chloroplast|cellular response to light stimulus|defense response to bacterium, incompatible interaction|positive regulation of sequence-specific DNA binding transcription factor activity
AT3G57130	1.08295	0.00051062	0.00185648	1.41968	1.32141	1.59455	0.77227	0.62327	0.695328	NPR6	Regulatory protein NPR6 [Source:UniProtKB/Swiss-Prot;Acc:Q9M1I7]
AT3G57240	8.18741	5.2485e-37	1.95463e-35	2.96987	3.73802	4.4955	0	0	0.0418547	BG3	beta-1,3-glucanase 3 [Source:TAIR;Acc:AT3G57240]	hydrolase activity, hydrolyzing O-glycosyl compounds|extracellular region|vacuole|endoplasmic reticulum|carbohydrate metabolic process|polysaccharide binding|glucan endo-1,3-beta-D-glucosidase activity|anchored component of plasma membrane|cell wall|cellulase activity|response to bacterium|apoplast
AT3G57260	10.557	2.12864e-83	2.63827e-81	14.7143	15.1797	19.2864	0.0365437	0	0	BG2	Glucan endo-1,3-beta-glucosidase, acidic isoform [Source:UniProtKB/Swiss-Prot;Acc:P33157]
AT3G57280	1.13844	9.50539e-28	2.51598e-26	65.741	69.4996	66.2716	33.794	29.5196	32.7442	FAX1	Protein FATTY ACID EXPORT 1, chloroplastic [Source:UniProtKB/Swiss-Prot;Acc:Q93V66]	chloroplast|integral component of membrane|chloroplast inner membrane|chloroplast envelope|plastid|pollen wall assembly|fatty acid transporter activity|fatty acid transport|lipid homeostasis|plant-type cell wall assembly|fatty acid transmembrane transport
AT3G57330	1.42288	1.13236e-38	4.45808e-37	42.5532	45.4106	50.0861	19.0327	17.1725	18.9029	ACA11	Putative calcium-transporting ATPase 11, plasma membrane-type [Source:UniProtKB/Swiss-Prot;Acc:Q9M2L4]	calcium-transporting ATPase activity|calmodulin binding|ATP binding|integral component of plasma membrane|metal ion binding|calcium ion transmembrane transport|vacuole|vacuolar membrane|plasma membrane|chloroplast|plant-type vacuole membrane|defense response to bacterium|negative regulation of programmed cell death|anion homeostasis|Golgi apparatus
AT3G57460	7.70357	2.77639e-60	2.05813e-58	3.68421	3.36623	4.75977	0.0578794	0	0		catalytics;metal ion binding [Source:TAIR;Acc:AT3G57460]	catalytic activity|cellular_component|metal ion binding
AT3G57520	1.053	1.52552e-08	1.11083e-07	67.3902	79.1083	89.3858	32.5685	46.2253	42.3342	RFS2	Probable galactinol--sucrose galactosyltransferase 2 [Source:UniProtKB/Swiss-Prot;Acc:Q94A08]
AT3G57600	1.73053	0.000453318	0.00166441	1.34353	0.975165	1.30085	0.591981	0.137242	0.417439	DREB2F	Dehydration-responsive element-binding protein 2F [Source:UniProtKB/Swiss-Prot;Acc:Q9SVX5]	DNA binding|transcription factor activity, sequence-specific DNA binding|nucleus|transcription, DNA-templated|regulation of transcription, DNA-templated
AT3G57640	2.37399	3.10417e-08	2.18233e-07	2.66672	3.32575	4.56117	0.870778	0.517255	0.657811		Protein kinase superfamily protein [Source:TAIR;Acc:AT3G57640]	protein kinase activity|ATP binding|protein phosphorylation
AT3G57700	3.22358	5.52764e-17	8.25797e-16	2.90242	4.44362	3.88764	0.46183	0.40782	0.639296		Protein kinase superfamily protein [Source:TAIR;Acc:AT3G57700]	ATP binding|nucleus|protein phosphorylation|kinase activity|phosphorylation
AT3G57760	1.06471	1.98368e-06	1.09983e-05	3.14928	3.68413	3.5655	1.49964	1.77144	1.81817		Protein kinase superfamily protein [Source:TAIR;Acc:AT3G57760]	protein kinase activity|ATP binding|nucleus|protein phosphorylation
AT3G57950	1.83033	2.51304e-05	0.00011634	2.40759	2.28568	1.72992	0.881684	0.456159	0.778425		unknown protein; FUNCTIONS IN: molecular_function unknown; INVOLVED IN: biological_process unknown; LOCATED IN: chloroplast; EXPRESSED IN: 9 plant structures; EXPRESSED DURING: 4 anthesis, C globular stage, petal differentiation and expansion stage; /.../Arabidopsis thaliana protein match is: unknown protein (TAIR:AT2G42180.1); Has 81 Blast hits to 81 proteins in 11 species: Archae - 0; Bacteria …	molecular_function|biological_process|chloroplast
AT3G58270	1.27657	1.79635e-05	8.54059e-05	1.97741	2.39008	1.9146	0.882072	1.00657	0.702497		MATH domain and coiled-coil domain-containing protein At3g58270 [Source:UniProtKB/Swiss-Prot;Acc:Q9M2I9]	molecular_function|nucleus|biological_process
AT3G58990	2.14031	1.52917e-25	3.67771e-24	49.748	39.1688	42.223	14.2958	6.93677	10.4264	IPMI1	3-isopropylmalate dehydratase small subunit 2 [Source:UniProtKB/Swiss-Prot;Acc:Q9LYT7]	mitochondrion|leucine biosynthetic process|hydro-lyase activity|plastid|3-isopropylmalate dehydratase activity|chloroplast stroma|glucosinolate biosynthetic process
AT3G59220	1.91786	1.99736e-67	1.77228e-65	82.0392	84.0382	71.4976	24.212	21.5171	21.2663	PRN1	Pirin-1 [Source:UniProtKB/Swiss-Prot;Acc:Q9LX49]
AT3G59440	1.15452	0.0192856	0.0475392	1.10804	1.2877	1.39336	0.573747	0.709664	0.731175	CML4	Calmodulin-like protein 4 [Source:UniProtKB/Swiss-Prot;Acc:Q9LX27]
AT3G59700	1.84648	4.05563e-35	1.42434e-33	7.64995	8.64975	8.54664	2.26088	2.53492	2.57213	LECRK55	L-type lectin-domain containing receptor kinase V.5 [Source:UniProtKB/Swiss-Prot;Acc:Q96285]
AT3G59710	1.12457	6.52536e-09	4.94681e-08	10.5391	12.23	9.95885	5.70458	5.04271	5.24364		NAD(P)-binding Rossmann-fold superfamily protein [Source:TAIR;Acc:AT3G59710]	cytoplasm|oxidoreductase activity|oxidation-reduction process
AT3G59740	3.28847	2.88094e-07	1.79389e-06	0.553525	0.805844	0.420625	0.140913	0.0718176	0	LECRK57	L-type lectin-domain containing receptor kinase V.7 [Source:UniProtKB/Swiss-Prot;Acc:Q9ZR79]
AT3G59880	1.57562	3.08193e-10	2.66203e-09	6.41694	6.76115	7.29875	2.54896	2.24597	2.79153		unknown protein; FUNCTIONS IN: molecular_function unknown; INVOLVED IN: biological_process unknown; LOCATED IN: plasma membrane; BEST Arabidopsis thaliana protein match is: unknown protein (TAIR:AT2G44010.1); Has 20 Blast hits to 20 proteins in 7 sp /.../ Archae - 0; Bacteria - 0; Metazoa - 0; Fungi - 0; Plants - 20; Viruses - 0; Other Eukaryotes - 0 (source: NCBI BLink). [Source:TAIR;Acc:AT3G598…	molecular_function|mitochondrion|biological_process|plasma membrane
AT3G59930	2.01014	2.19049e-18	3.5584e-17	16.5223	23.5914	21.9807	4.17881	5.8346	5.85617		Defensin-like protein 206 [Source:UniProtKB/Swiss-Prot;Acc:Q94JR6]	molecular_function|extracellular region|killing of cells of other organism|defense response to fungus
AT3G60120	6.10808	8.39574e-13	9.23335e-12	1.13299	0.792911	1.75434	0.0756042	0	0	BGLU27	Beta-glucosidase 27 [Source:UniProtKB/Swiss-Prot;Acc:Q9M1D1]	hydrolase activity, hydrolyzing O-glycosyl compounds|nucleus|carbohydrate metabolic process|beta-glucosidase activity|response to salt stress|response to hormone|glucosinolate catabolic process
AT3G60160	1.96721	2.69054e-17	4.09791e-16	1.05419	1.20848	1.20476	0.376843	0.226228	0.310564	ABCC9	ABC transporter C family member 9 [Source:UniProtKB/Swiss-Prot;Acc:Q9M1C7]	ATP binding|plasma membrane|xenobiotic-transporting ATPase activity|integral component of membrane|ATPase activity, coupled to transmembrane movement of substances|response to nematode|plasmodesma
AT3G60420	7.18818	6.86247e-88	9.03108e-86	38.0403	38.7242	50.04	0.430065	0.244044	0.189634		Phosphoglycerate mutase family protein [Source:TAIR;Acc:AT3G60420]	cellular_component
AT3G60450	1.04712	1.07183e-23	2.36642e-22	53.8972	58.9514	51.9837	28.7279	25.1373	32.5758		Phosphoglycerate mutase family protein [Source:TAIR;Acc:AT3G60450]	nucleus|biological_process|cytosol
AT3G60470	5.49461	1.58797e-18	2.6159e-17	0.90208	1.16658	0.956778	0	0.0496994	0.0250829		Plant protein of unknown function (DUF247) [Source:TAIR;Acc:AT3G60470]	plasma membrane|biological_process|integral component of membrane
AT3G60540	2.36748	3.58165e-17	5.42692e-16	5.46834	6.60503	4.18134	0.91791	0.758818	1.17455		Preprotein translocase Sec, Sec61-beta subunit protein [Source:TAIR;Acc:AT3G60540]	Sec61 translocon complex|intracellular protein transport|protein transporter activity|protein transport|integral component of membrane
AT3G60961	3.70492	0.00197712	0.00630983	0.310435	0.638828	0.10933	0	0	0.105853		P-loop containing nucleoside triphosphate hydrolases superfamily protein [Source:TAIR;Acc:AT3G60961]	ATP binding|cytoplasm|nucleobase-containing compound metabolic process|phosphorylation|hydrolase activity|nucleobase-containing compound kinase activity
AT3G60966	6.60018	6.79754e-15	8.81685e-14	2.28517	1.73678	1.88076	0	0	0.0650249		RING/U-box superfamily protein [Source:TAIR;Acc:AT3G60966]	biological_process|zinc ion binding|integral component of membrane
AT3G61280	2.97997	1.45042e-16	2.09728e-15	1.17044	1.16658	1.63016	0.0774631	0.0784806	0.337031		Arabidopsis thaliana protein of unknown function (DUF821) [Source:TAIR;Acc:AT3G61280]	extracellular region|integral component of membrane
AT3G61400	5.1492	1.39574e-13	1.64215e-12	1.07365	1.03487	1.30585	0.140072	0	0		1-aminocyclopropane-1-carboxylate oxidase homolog 8 [Source:UniProtKB/Swiss-Prot;Acc:Q9M2C4]	cytoplasm|metal ion binding|oxidation-reduction process|1-aminocyclopropane-1-carboxylate oxidase activity
AT3G61440	1.06173	1.99637e-39	8.06291e-38	607.687	605.406	619.463	303.205	293.982	311.814	CYSC1	Bifunctional L-3-cyanoalanine synthase/cysteine synthase C1, mitochondrial [Source:UniProtKB/Swiss-Prot;Acc:Q9S757]	cysteine synthase activity|mitochondrion|cysteine biosynthetic process from serine|transferase activity|cysteine biosynthetic process|pyridoxal phosphate binding|cyanide metabolic process|L-3-cyanoalanine synthase activity|detoxification of nitrogen compound|chloroplast|copper ion binding|cyanide catabolic process|root hair cell development|immune response
AT3G61820	1.47198	1.20158e-53	7.46607e-52	66.0545	67.2139	71.7917	25.3615	28.0932	26.0728		Eukaryotic aspartyl protease family protein [Source:TAIR;Acc:AT3G61820]	extracellular region|proteolysis|plant-type cell wall|plasmodesma
AT3G62150	1.65835	1.81306e-66	1.56143e-64	20.2331	20.1781	21.7241	6.32957	7.12474	7.61291	ABCB21	ABC transporter B family member 21 [Source:UniProtKB/Swiss-Prot;Acc:Q9M1Q9]	ATP binding|plasma membrane|basipetal auxin transport|integral component of membrane|ATPase activity, coupled to transmembrane movement of substances|transmembrane transport|vacuolar membrane|auxin efflux|auxin influx transmembrane transporter activity|auxin efflux transmembrane transporter activity|auxin influx
AT3G62210	1.6335	0.00922291	0.0249794	0.298102	0.819904	0.760112	0.172454	0.342372	0.171365	EDA32	Putative endonuclease or glycosyl hydrolase [Source:TAIR;Acc:AT3G62210]	endonuclease activity|nucleus|peroxisome|regulation of gene expression|integral component of membrane|polar nucleus fusion
AT3G62820	1.06132	3.00913e-22	6.18842e-21	72.734	73.5222	70.957	40.8678	34.9222	34.0476		Plant invertase/pectin methylesterase inhibitor superfamily protein [Source:TAIR;Acc:AT3G62820]	enzyme inhibitor activity|negative regulation of catalytic activity|pectinesterase inhibitor activity
AT3G63030	1.12881	1.26425e-11	1.23706e-10	14.4877	15.0772	13.7474	6.78979	6.19527	7.56449	MBD4	Methyl-CpG-binding domain-containing protein 4 [Source:UniProtKB/Swiss-Prot;Acc:Q9LYB9]	negative regulation of transcription from RNA polymerase II promoter|DNA binding|nucleus|methylation-dependent chromatin silencing|transcription, DNA-templated|zinc ion binding|methyl-CpG binding|cytosine C-5 DNA demethylase activity
AT3G63160	1.08833	2.06618e-22	4.27942e-21	83.7146	100.335	96.2218	46.7434	49.0599	46.4947		FUNCTIONS IN: molecular_function unknown; INVOLVED IN: biological_process unknown; LOCATED IN: chloroplast outer membrane, thylakoid, chloroplast thylakoid membrane, chloroplast, chloroplast envelope; EXPRESSED IN: 21 plant structures; EXPRESSED DUR /.../3 growth stages; BEST Arabidopsis thaliana protein match is: outer envelope membrane protein 7 (TAIR:AT3G52420.1); Has 26 Blast hits to 26 prote…
AT3G63380	2.90197	9.5763e-48	4.95198e-46	10.3484	11.5961	13.425	1.75643	1.5316	1.65315	ACA12	Calcium-transporting ATPase 12, plasma membrane-type [Source:UniProtKB/Swiss-Prot;Acc:Q9LY77]	calcium-transporting ATPase activity|calmodulin binding|ATP binding|integral component of plasma membrane|intracellular membrane-bounded organelle|metal ion binding|calcium ion transmembrane transport
AT4G00390	2.24125	0.00136853	0.00452921	1.34119	0.767781	0.5877	0.119036	0.324688	0.163893		DNA-binding storekeeper protein-related transcriptional regulator [Source:TAIR;Acc:AT4G00390]	DNA binding|nucleus|regulation of transcription, DNA-templated|nucleolus
AT4G00955	1.02892	1.82738e-05	8.67581e-05	4.02575	4.15098	3.55827	2.19401	1.35174	2.58612		FUNCTIONS IN: molecular_function unknown; INVOLVED IN: biological_process unknown; LOCATED IN: endomembrane system; EXPRESSED IN: 14 plant structures; EXPRESSED DURING: 9 growth stages; CONTAINS InterPro DOMAIN/s: EGF-like (InterPro:IPR006210); BEST /.../dopsis thaliana protein match is: Protein kinase superfamily protein (TAIR:AT2G23450.1); Has 94 Blast hits to 88 proteins in 13 species: Archae …	molecular_function|extracellular region|biological_process
AT4G01010	3.19781	5.45463e-22	1.10627e-20	10.7337	11.4849	15.2032	1.67751	1.34342	1.07881	CNGC13	Putative cyclic nucleotide-gated ion channel 13 [Source:UniProtKB/Swiss-Prot;Acc:Q9LD40]	ion channel activity|voltage-gated potassium channel activity|calmodulin binding|plasma membrane|integral component of plasma membrane|cyclic nucleotide binding|cAMP binding|cGMP binding|regulation of membrane potential
AT4G01026	1.75191	3.54878e-54	2.22869e-52	42.634	40.5366	44.4507	13.4855	12.2837	14.7228	PYL7	Abscisic acid receptor PYL7 [Source:UniProtKB/Swiss-Prot;Acc:Q1ECF1]	receptor activity|nucleus|cytoplasm|plasma membrane|abscisic acid-activated signaling pathway|abscisic acid binding|regulation of protein serine/threonine phosphatase activity|protein binding|protein phosphatase inhibitor activity
AT4G01360	1.77652	1.30897e-16	1.90451e-15	5.28857	5.38817	5.78085	0.969818	1.84197	2.31627		unknown protein; BEST Arabidopsis thaliana protein match is: Protein of unknown function (DUF793) (TAIR:AT1G01550.2); Has 99 Blast hits to 99 proteins in 25 species: Archae - 0; Bacteria - 10; Metazoa - 0; Fungi - 0; Plants - 89; Viruses - 0; Other /.../otes - 0 (source: NCBI BLink). [Source:TAIR;Acc:AT4G01360]
AT4G01700	1.9806	2.74801e-38	1.0693e-36	51.2116	60.912	66.9727	16.3096	16.9899	15.4529		Chitinase family protein [Source:TAIR;Acc:AT4G01700]	chitinase activity|extracellular region|carbohydrate metabolic process|chitin catabolic process|cell wall macromolecule catabolic process|cell wall|defense response to fungus
AT4G01720	1.00395	2.21805e-18	3.60068e-17	16.8463	15.6898	16.6269	8.62202	7.64309	9.34447	WRKY47	Probable WRKY transcription factor 47 [Source:UniProtKB/Swiss-Prot;Acc:Q9ZSI7]	transcription factor activity, sequence-specific DNA binding|nucleus|transcription, DNA-templated|regulation of transcription, DNA-templated|sequence-specific DNA binding
AT4G01750	1.64167	1.57367e-10	1.39686e-09	13.2499	15.1336	19.5497	5.73579	5.1609	4.89551	RGXT2	UDP-D-xylose:L-fucose alpha-1,3-D-xylosyltransferase 2 [Source:UniProtKB/Swiss-Prot;Acc:Q9ZSJ0]	Golgi membrane|chloroplast|integral component of membrane|Golgi apparatus|rhamnogalacturonan II biosynthetic process|UDP-xylosyltransferase activity
AT4G01870	1.03683	1.1862e-10	1.06462e-09	85.1584	96.2863	111.218	54.3842	44.8983	53.5685		tolB protein-related [Source:TAIR;Acc:AT4G01870]	molecular_function|nucleus|proteolysis
AT4G01895	2.4588	1.51884e-12	1.63356e-11	7.41226	10.1413	11.1822	1.45746	1.56441	2.85514		systemic acquired resistance (SAR) regulator protein NIMIN-1-related [Source:TAIR;Acc:AT4G01895]	molecular_function|nucleus|regulation of systemic acquired resistance
AT4G01970	1.32641	0.000508489	0.0018493	0.810343	1.00496	0.728285	0.185649	0.274154	0.636883	RFS4	Probable galactinol--sucrose galactosyltransferase 4 [Source:UniProtKB/Swiss-Prot;Acc:Q9SYJ4]
AT4G02330	2.11931	1.30089e-23	2.86136e-22	47.9604	58.3649	63.4778	10.7147	14.0141	16.5429	PME41	Probable pectinesterase/pectinesterase inhibitor 41 [Source:UniProtKB/Swiss-Prot;Acc:Q8RXK7]
AT4G02520	4.33998	8.91328e-198	4.01526e-195	3008.77	3010.59	3423.31	164.221	152.984	178.699	GSTF2	Glutathione S-transferase F2 [Source:UniProtKB/Swiss-Prot;Acc:P46422]	glutathione transferase activity|peroxidase activity|cytoplasm|endoplasmic reticulum|glutathione metabolic process|auxin-activated signaling pathway|oxidation-reduction process|toxin catabolic process|response to cold|chloroplast|glutathione binding|vacuole|chloroplast stroma|response to cadmium ion|defense response to bacterium|plasma membrane|membrane|response to salt stress|apoplast|response t…
AT4G03420	1.1759	5.41178e-32	1.7062e-30	47.6164	51.0007	53.3013	21.1003	23.2393	26.8287		Protein of unknown function (DUF789) [Source:TAIR;Acc:AT4G03420]	molecular_function|nucleus|biological_process
AT4G03450	6.77336	2.51347e-46	1.25539e-44	2.47787	1.97562	2.68382	0	0.0241577	0.0485336		Ankyrin repeat family protein [Source:TAIR;Acc:AT4G03450]	integral component of membrane|regulation of defense response|cellular response to salicylic acid stimulus|regulation of salicylic acid mediated signaling pathway
AT4G03460	2.01918	0.00126271	0.00420874	0.526858	1.09917	1.45876	0.322107	0.374042	0.199401		Ankyrin repeat family protein [Source:TAIR;Acc:AT4G03460]	biological_process|integral component of membrane|regulation of defense response|cellular response to salicylic acid stimulus|regulation of salicylic acid mediated signaling pathway
AT4G03470	Inf	0.0199507	0.0489162	0.0726793	0.0959189	0.050084	0	0	0		Ankyrin repeat family protein [Source:TAIR;Acc:AT4G03470]	mitochondrion|integral component of membrane|regulation of defense response|cellular response to salicylic acid stimulus|regulation of salicylic acid mediated signaling pathway
AT4G03510	1.03478	2.50396e-27	6.5245e-26	37.717	35.3056	37.2614	16.254	21.3246	19.4037	RMA1	E3 ubiquitin-protein ligase RMA1 [Source:UniProtKB/Swiss-Prot;Acc:O64425]	nucleus|endoplasmic reticulum membrane|zinc ion binding|integral component of membrane|protein ubiquitination|ligase activity|ubiquitin-protein transferase activity|ubiquitin-dependent protein catabolic process|endoplasmic reticulum|protein exit from endoplasmic reticulum|membrane|secretion by cell
AT4G03960	1.38025	1.70122e-09	1.37323e-08	11.2982	9.99448	7.8677	3.44204	3.17396	4.44607		Phosphotyrosine protein phosphatases superfamily protein [Source:TAIR;Acc:AT4G03960]
AT4G04220	2.63366	2.0468e-38	7.99105e-37	5.40297	5.63792	6.91099	1.3005	0.880797	0.912142	AtRLP46	receptor like protein 46 [Source:TAIR;Acc:AT4G04220]
AT4G04490	4.71181	2.73397e-50	1.53214e-48	3.29835	3.36028	4.5252	0.180824	0.139157	0.1171	CRK36	Cysteine-rich receptor-like protein kinase 36 [Source:UniProtKB/Swiss-Prot;Acc:Q9XEC6]	ATP binding|extracellular region|protein phosphorylation|plasmodesma|integral component of membrane|kinase activity|defense response to bacterium|protein serine/threonine kinase activity|protein binding|plasma membrane|response to abscisic acid
AT4G04500	8.33086	1.10439e-45	5.41222e-44	1.92916	1.82401	2.47805	0.023079	0	0	CRK37	Cysteine-rich receptor-like protein kinase 37 [Source:UniProtKB/Swiss-Prot;Acc:Q9XEC7]	protein serine/threonine kinase activity|ATP binding|plasma membrane|protein phosphorylation|plasmodesma|integral component of membrane|kinase activity|defense response to bacterium
AT4G04510	8.37491	4.93155e-49	2.65567e-47	1.96657	1.86936	2.55322	0	0	0	CRK38	Cysteine-rich receptor-like protein kinase 38 [Source:UniProtKB/Swiss-Prot;Acc:Q9XEC8]	protein serine/threonine kinase activity|ATP binding|plasma membrane|protein phosphorylation|plasmodesma|chloroplast|integral component of membrane|kinase activity|defense response to bacterium
AT4G04540	Inf	2.23807e-160	7.38407e-158	6.73053	6.9463	7.48332	0	0	0	CRK39	Putative cysteine-rich receptor-like protein kinase 39 [Source:UniProtKB/Swiss-Prot;Acc:Q9SYS7]	protein serine/threonine kinase activity|ATP binding|extracellular region|plasma membrane|protein phosphorylation|plasmodesma|integral component of membrane|kinase activity|defense response to bacterium
AT4G04700	1.4559	7.19361e-13	7.97493e-12	6.22061	8.74588	8.4885	3.60263	2.95124	2.81819	CPK27	Calcium-dependent protein kinase 27 [Source:UniProtKB/Swiss-Prot;Acc:Q9ZSA4]	calmodulin-dependent protein kinase activity|calcium ion binding|calmodulin binding|ATP binding|nucleus|plasma membrane|abscisic acid-activated signaling pathway|calcium-dependent protein serine/threonine kinase activity|kinase activity|peptidyl-serine phosphorylation|intracellular signal transduction|protein autophosphorylation|cytosol
AT4G04710	4.12612	5.96688e-41	2.54135e-39	0.901913	1.21399	1.55379	0.0798224	0.0545803	0.0273811	CPK22	calcium-dependent protein kinase 22 [Source:TAIR;Acc:AT4G04710]	calmodulin-dependent protein kinase activity|calmodulin binding|nucleus|cytoplasm|plasma membrane|protein phosphorylation|abscisic acid-activated signaling pathway|calcium-dependent protein serine/threonine kinase activity|kinase activity|peptidyl-serine phosphorylation|intracellular signal transduction|protein autophosphorylation|plasmodesma
AT4G04760	1.20994	0.0226502	0.0546822	0.259348	0.338578	0.529572	0.0853745	0.0866595	0.259209		Major facilitator superfamily protein [Source:TAIR;Acc:AT4G04760]	sugar:proton symporter activity|plasma membrane|carbohydrate transmembrane transporter activity|membrane
AT4G05030	3.28758	0.0025253	0.0078601	0.765921	0	0	0	0	0		Copper transport protein family [Source:TAIR;Acc:AT4G05030]	metal ion binding
AT4G05120	2.58439	1.83436e-82	2.21494e-80	20.902	23.3052	22.0073	3.88178	3.84836	3.53028	ENT3	Equilibrative nucleotide transporter 3 [Source:UniProtKB/Swiss-Prot;Acc:Q9M0Y3]
AT4G05390	1.20509	1.07773e-30	3.22837e-29	30.536	30.4194	32.6432	15.2617	14.4769	13.1725	RFNR1	Ferredoxin--NADP reductase, root isozyme 1, chloroplastic [Source:UniProtKB/Swiss-Prot;Acc:Q9M0V6]	ferredoxin-NADP+ reductase activity|chloroplast|photosynthesis|oxidoreductase activity|oxidation-reduction process|copper ion binding
AT4G06746	3.40017	1.98453e-37	7.51013e-36	15.0035	13.7016	17.5164	2.03369	0.949198	1.90135	RAP2-9	Ethylene-responsive transcription factor RAP2-9 [Source:UniProtKB/Swiss-Prot;Acc:Q8W3M3]
AT4G08390	1.12579	1.006e-33	3.40542e-32	57.4659	57.1002	62.482	30.9445	29.4981	26.7028	APXS	L-ascorbate peroxidase S, chloroplastic/mitochondrial [Source:UniProtKB/Swiss-Prot;Acc:Q42592]
AT4G08470	2.25592	7.63948e-95	1.15455e-92	26.4101	29.7253	30.9623	6.18758	5.93202	6.58733	MAPKKK10	MAPK/ERK kinase kinase 3 [Source:TAIR;Acc:AT4G08470]
AT4G08555	2.55172	3.07776e-13	3.5169e-12	19.0587	20.3596	28.8609	5.14095	3.52415	3.83277		unknown protein; FUNCTIONS IN: molecular_function unknown; INVOLVED IN: biological_process unknown; LOCATED IN: cellular_component unknown; EXPRESSED IN: cultured cell; Has 4 Blast hits to 4 proteins in 2 species: Archae - 0; Bacteria - 0; Metazoa - /.../ngi - 0; Plants - 4; Viruses - 0; Other Eukaryotes - 0 (source: NCBI BLink). [Source:TAIR;Acc:AT4G08555]	molecular_function|cellular_component|biological_process
AT4G08770	5.02525	4.26969e-223	2.70317e-220	207.57	209.17	239.4	8.48185	5.19464	7.47075	PER37	Peroxidase 37 [Source:UniProtKB/Swiss-Prot;Acc:Q9LDN9]
AT4G08780	4.52923	1.9878e-49	1.08037e-47	12.7059	13.4313	15.8928	1.28061	0.432546	0.437902	PER38	Peroxidase 38 [Source:UniProtKB/Swiss-Prot;Acc:Q9LDA4]	peroxidase activity|extracellular region|response to oxidative stress|heme binding|hydrogen peroxide catabolic process|metal ion binding|oxidation-reduction process|vacuole
AT4G08850	1.30823	5.19158e-12	5.2813e-11	69.0088	73.3795	91.2025	30.3408	33.1071	35.9932		Probable LRR receptor-like serine/threonine-protein kinase At4g08850 [Source:UniProtKB/Swiss-Prot;Acc:Q8VZG8]
AT4G08870	3.20855	8.9547e-262	9.53472e-259	180.681	172.846	180.244	23.3191	19.4289	19.8339	ARGAH2	Arginase 2, mitochondrial [Source:UniProtKB/Swiss-Prot;Acc:Q9ZPF5]	urea cycle|mitochondrion|arginine metabolic process|polyamine metabolic process|agmatinase activity|hydrolase activity|metal ion binding|chloroplast|arginase activity|cobalt ion binding|proline metabolic process|tyrosine metabolic process|ornithine metabolic process|putrescine metabolic process|defense response to fungus
AT4G09120	Inf	0.0133233	0.0345012	0.109014	0.16494	0.283673	0	0	0	ATL36	Putative RING-H2 finger protein ATL36 [Source:UniProtKB/Swiss-Prot;Acc:Q9M0R5]	zinc ion binding|integral component of membrane|protein ubiquitination
AT4G09420	1.26084	1.39963e-10	1.249e-09	4.06747	4.18768	5.17774	1.98767	2.15132	2.14706		Disease resistance protein (TIR-NBS class) [Source:TAIR;Acc:AT4G09420]	defense response|signal transduction|ADP binding
AT4G09570	1.24801	1.37595e-14	1.74698e-13	37.9396	43.7795	50.069	19.8434	17.9028	21.245	CPK4	Calcium-dependent protein kinase 4 [Source:UniProtKB/Swiss-Prot;Acc:Q38869]	calmodulin-dependent protein kinase activity|calcium ion binding|calmodulin binding|ATP binding|nucleus|plasma membrane|protein phosphorylation|calcium-dependent protein serine/threonine kinase activity|kinase activity|peptidyl-serine phosphorylation|intracellular signal transduction|protein autophosphorylation|protein binding|protein kinase activity|positive regulation of abscisic acid-activated…
AT4G09770	1.9109	1.55347e-08	1.13013e-07	1.37391	1.38696	2.23296	0.542927	0.360703	0.609845		TRAF-like family protein [Source:TAIR;Acc:AT4G09770]	molecular_function|nucleus|biological_process
AT4G09780	2.90793	0.00301076	0.00919879	0.183581	0.180344	0.338255	0.0706616	0	0		TRAF-like family protein [Source:TAIR;Acc:AT4G09780]	molecular_function|biological_process|chloroplast
AT4G09820	2.17683	3.15153e-07	1.95614e-06	1.28314	0.776173	0.780729	0.13825	0.208839	0.2817	TT8	Transcription factor TT8 [Source:UniProtKB/Swiss-Prot;Acc:Q9FT81]	DNA binding|nucleus|transcription, DNA-templated|regulation of transcription, DNA-templated|flavonoid biosynthetic process|protein dimerization activity|regulation of flavonoid biosynthetic process|transcription factor activity, sequence-specific DNA binding|protein binding|regulation of proanthocyanidin biosynthetic process|trichome differentiation|transcription regulatory region sequence-specif…
AT4G10270	2.59725	1.6354e-16	2.35749e-15	9.19975	14.9243	12.0965	0.787145	2.34708	2.23444		Wound-responsive family protein [Source:TAIR;Acc:AT4G10270]	molecular_function|nucleus|response to wounding
AT4G10720	1.25665	0.0233161	0.0561164	0.435994	0.59981	0.656991	0.299269	0.134609	0.372309		Ankyrin repeat family protein [Source:TAIR;Acc:AT4G10720]	biological_process|integral component of membrane
AT4G11000	2.16843	3.0002e-10	2.59526e-09	1.52515	1.5768	1.77799	0.313813	0.35705	0.445702		Ankyrin repeat family protein [Source:TAIR;Acc:AT4G11000]	biological_process|integral component of membrane
AT4G11070	2.97822	0.011674	0.0307262	0.145331	0.241978	0.551262	0.141467	0	0	WRKY41	Probable WRKY transcription factor 41 [Source:UniProtKB/Swiss-Prot;Acc:Q8H0Y8]	transcription factor activity, sequence-specific DNA binding|nucleus|transcription, DNA-templated|regulation of transcription, DNA-templated|sequence-specific DNA binding
AT4G11170	Inf	5.00315e-29	1.41716e-27	2.13654	2.28398	3.59494	0	0	0		Putative disease resistance protein At4g11170 [Source:UniProtKB/Swiss-Prot;Acc:O82500]
AT4G11290	1.1157	8.22992e-14	9.82098e-13	57.8123	52.7364	46.2059	29.7562	23.9178	23.9748	PER39	Peroxidase 39 [Source:UniProtKB/Swiss-Prot;Acc:Q9SUT2]	peroxidase activity|extracellular region|response to oxidative stress|heme binding|hydrogen peroxide catabolic process|metal ion binding|oxidation-reduction process
AT4G11470	2.057	4.19695e-05	0.000186837	0.47206	0.396666	0.606044	0.137873	0.09344	0.164865	CRK31	Putative cysteine-rich receptor-like protein kinase 31 [Source:UniProtKB/Swiss-Prot;Acc:Q9LDM5]	protein kinase activity|protein serine/threonine kinase activity|ATP binding|extracellular region|plasma membrane|protein phosphorylation|plasmodesma|integral component of membrane|defense response to bacterium
AT4G11480	Inf	7.02638e-07	4.14696e-06	0.142911	0.541265	0.367137	0	0	0	CRK32	Putative cysteine-rich receptor-like protein kinase 32 [Source:UniProtKB/Swiss-Prot;Acc:Q9LDS6]	protein serine/threonine kinase activity|ATP binding|extracellular region|plasma membrane|protein phosphorylation|plasmodesma|integral component of membrane|kinase activity|defense response to bacterium
AT4G11521	1.09494	8.33129e-11	7.58199e-10	10.5711	11.3498	9.61031	4.64143	5.12969	5.55728	CRK34	Putative cysteine-rich receptor-like protein kinase 34 [Source:UniProtKB/Swiss-Prot;Acc:Q8LPI0]	extracellular region
AT4G11650	3.6031	6.66504e-29	1.87204e-27	197.5	272.714	295.291	18.7446	21.3142	26.7961	OSM34	Osmotin-like protein OSM34 [Source:UniProtKB/Swiss-Prot;Acc:P50700]	extracellular region|response to other organism|response to salt stress|defense response to fungus, incompatible interaction|defense response to bacterium, incompatible interaction
AT4G11655	1.86607	0.000168603	0.000673979	1.29767	2.44057	2.26072	0.541135	0.734939	0.554706		CASP-like protein 4A4 [Source:UniProtKB/Swiss-Prot;Acc:Q3EA54]
AT4G11850	1.62931	1.94598e-35	6.93828e-34	30.7087	30.0638	35.7808	11.5598	10.7779	10.2391	PLDGAMMA1	Phospholipase D gamma 1 [Source:UniProtKB/Swiss-Prot;Acc:Q9T053]	phospholipase D activity|calcium ion binding|cytoplasm|lipid catabolic process|phosphatidylcholine metabolic process|N-acylphosphatidylethanolamine-specific phospholipase D activity|defense response to bacterium, incompatible interaction|embryo development ending in seed dormancy|plasma membrane|protein binding|membrane lipid metabolic process|response to oxidative stress|response to aluminum ion…
AT4G11890	7.21278	5.39443e-75	5.71785e-73	24.0494	28.4299	33.3492	0.248619	0.12718	0.160343	CRK45	Cysteine-rich receptor-like protein kinase 45 [Source:UniProtKB/Swiss-Prot;Acc:Q8GY82]
AT4G12030	1.55322	8.63634e-11	7.83525e-10	21.8358	18.2552	18.3052	9.90028	3.59085	8.31458	BASS5	Probable sodium/metabolite cotransporter BASS5, chloroplastic [Source:UniProtKB/Swiss-Prot;Acc:F4JPW1]
AT4G12170	2.0715	0.0124488	0.0324917	1.90231	0.964235	0.983261	0.242419	0.717457	0		Thioredoxin superfamily protein [Source:TAIR;Acc:AT4G12170]	glycerol ether metabolic process|chloroplast
AT4G12290	3.30801	1.71828e-41	7.45384e-40	2.7845	3.15933	3.17102	0.27776	0.372857	0.340091		Copper amine oxidase family protein [Source:TAIR;Acc:AT4G12290]	copper ion binding|extracellular region|primary amine oxidase activity|integral component of membrane|quinone binding|oxidation-reduction process|vacuole|endosome|Golgi apparatus|trans-Golgi network
AT4G12470	3.06583	8.39303e-28	2.22406e-26	1082.54	1217.63	1512.35	106.02	174.301	199.704	AZI1	pEARLI1-like lipid transfer protein 1 [Source:UniProtKB/Swiss-Prot;Acc:Q9SU35]	extracellular region|cell wall|lipid transport|lipid binding|plant-type hypersensitive response|defense response to fungus|systemic acquired resistance|cold acclimation|cellular response to cold|plasmodesma|induced systemic resistance|protein binding|endoplasmic reticulum|protein self-association|chloroplast outer membrane|apoplast
AT4G12480	5.1243	2.05771e-50	1.15592e-48	944.86	1138.8	1359.75	28.3064	26.4111	49.6122	EARLI1	Lipid transfer protein EARLI 1 [Source:UniProtKB/Swiss-Prot;Acc:Q39176]	extracellular region|lipid transport|lipid binding|defense response to fungus|response to cold|response to salt stress|response to abscisic acid|plant-type cell wall|endoplasmic reticulum|plasmodesma|induced systemic resistance|chloroplast outer membrane
AT4G12490	7.23111	3.75696e-225	2.44463e-222	144.481	144.314	167.661	0.639462	2.03738	0.434295		pEARLI1-like lipid transfer protein 2 [Source:UniProtKB/Swiss-Prot;Acc:Q9SU34]
AT4G12500	7.38165	4.06012e-107	7.20518e-105	23.8159	22.5064	25.2413	0.218491	0.109143	0.222228		pEARLI1-like lipid transfer protein 3 [Source:UniProtKB/Swiss-Prot;Acc:Q9SU33]	extracellular region|cell wall|lipid transport|lipid binding
AT4G12550	1.25239	4.9063e-10	4.17472e-09	108.705	145.639	130.473	73.4725	48.9283	48.8598	AIR1	Putative lipid-binding protein AIR1 [Source:UniProtKB/Swiss-Prot;Acc:Q9S7I2]	extracellular region|lipid transport|lipid binding|response to auxin|lateral root morphogenesis
AT4G12720	2.50562	6.33396e-53	3.86388e-51	88.6	90.1809	105.127	12.9261	14.438	17.8506	NUDT7	Nudix hydrolase 7 [Source:UniProtKB/Swiss-Prot;Acc:Q9SU14]	NAD+ diphosphatase activity|nucleus|hydrolase activity|metal ion binding|ADP-ribose diphosphatase activity|cytosol|NAD binding|ADP-ribose pyrophosphohydrolase activity|response to oxidative stress|response to salt stress|response to ozone|plant-type hypersensitive response|defense response signaling pathway, resistance gene-dependent|regulation of starch biosynthetic process|ADP-glucose pyrophosp…
AT4G12870	2.95424	1.23495e-39	5.03107e-38	15.6946	14.4405	15.4746	1.42225	3.02299	1.7065		Gamma interferon responsive lysosomal thiol (GILT) reductase family protein [Source:TAIR;Acc:AT4G12870]	catalytic activity|extracellular region
AT4G13300	2.56809	1.31072e-08	9.6159e-08	1.91342	3.11578	3.36782	0.48622	0.666914	0.608289	TPS13	(Z)-gamma-bisabolene synthase 2 [Source:UniProtKB/Swiss-Prot;Acc:Q9T0K1]	magnesium ion binding|cytoplasm|chloroplast|terpene synthase activity|(Z)-gamma-bisabolene synthase activity|response to wounding|cyclase activity|sesquiterpenoid biosynthetic process|farnesyl diphosphate metabolic process
AT4G13310	4.05166	1.21826e-49	6.71474e-48	14.8695	19.1924	18.4652	0.723027	1.81035	1.07078	CYP71A20	Cytochrome P450 71A20 [Source:UniProtKB/Swiss-Prot;Acc:Q9T0K2]	iron ion binding|membrane|integral component of membrane|oxidoreductase activity, acting on paired donors, with incorporation or reduction of molecular oxygen|oxidoreductase activity, acting on paired donors, with incorporation or reduction of molecular oxygen, NAD(P)H as one donor, and incorporation of one atom of oxygen|oxygen binding|heme binding|secondary metabolite biosynthetic process|oxida…
AT4G13410	2.41402	7.91487e-33	2.57508e-31	5.34959	5.059	4.92129	1.3913	1.11881	0.45118	CSLA15	Probable mannan synthase 15 [Source:UniProtKB/Swiss-Prot;Acc:Q9T0L2]
AT4G13510	1.14556	4.4759e-34	1.53287e-32	63.4546	62.9437	65.2173	32.8075	28.1272	31.7364	AMT1-1	Ammonium transporter 1 member 1 [Source:UniProtKB/Swiss-Prot;Acc:P54144]
AT4G13770	2.6114	4.8473e-61	3.62773e-59	76.4957	67.0077	66.9712	16.5576	6.94926	12.9339	CYP83A1	Cytochrome P450 83A1 [Source:UniProtKB/Swiss-Prot;Acc:P48421]	iron ion binding|endoplasmic reticulum membrane|response to UV|membrane|integral component of membrane|oxygen binding|heme binding|oxidation-reduction process|glucosinolate biosynthetic process|oxidoreductase activity, acting on paired donors, with incorporation or reduction of molecular oxygen, NAD(P)H as one donor, and incorporation of one atom of oxygen|response to insect
AT4G13820	2.91679	1.91175e-12	2.02637e-11	0.960469	0.824262	1.04528	0.116641	0.119267	0.179909		Leucine-rich repeat (LRR) family protein [Source:TAIR;Acc:AT4G13820]	plasma membrane|kinase activity|signal transduction
AT4G13880	Inf	0.0346083	0.0788234	0	0	0	0	0	0	AtRLP48	receptor like protein 48 [Source:TAIR;Acc:AT4G13880]
AT4G13920	2.14184	4.71776e-19	8.00242e-18	2.39626	2.29672	2.78459	0.512721	0.724504	0.526772	AtRLP50	receptor like protein 50 [Source:TAIR;Acc:AT4G13920]
AT4G14090	3.28433	4.43908e-13	5.02103e-12	4.10212	2.9779	2.43977	0.272267	0.358037	0.415461	UGT75C1	UDP-glycosyltransferase 75C1 [Source:UniProtKB/Swiss-Prot;Acc:Q0WW21]	UDP-glycosyltransferase activity|chloroplast|phenylpropanoid metabolic process|anthocyanin-containing compound biosynthetic process|UDP-glucosyltransferase activity|anthocyanin 5-O-glucosyltransferase activity
AT4G14220	1.18799	1.36769e-17	2.1373e-16	18.9157	20.9811	23.504	8.57159	9.85736	8.7473	RHF1A	E3 ubiquitin-protein ligase RHF1A [Source:UniProtKB/Swiss-Prot;Acc:Q4TU14]	protein polyubiquitination|nucleus|zinc ion binding|ligase activity|protein ubiquitination involved in ubiquitin-dependent protein catabolic process|proteasome-mediated ubiquitin-dependent protein catabolic process|ubiquitin protein ligase activity|ubiquitin-protein transferase activity|membrane|protein binding|megagametogenesis|proteasomal protein catabolic process|protein ubiquitination|regulat…
AT4G14365	6.36943	1.71083e-250	1.43129e-247	79.0771	85.0694	93.773	1.25132	0.567283	1.40414	XBAT34	Putative E3 ubiquitin-protein ligase XBAT34 [Source:UniProtKB/Swiss-Prot;Acc:Q9FPH0]	nucleus|zinc ion binding|protein ubiquitination|ligase activity
AT4G14370	1.59833	5.30627e-12	5.39026e-11	2.78703	3.09523	3.99027	1.10646	1.01191	1.13772		Disease resistance protein (TIR-NBS-LRR class) family [Source:TAIR;Acc:AT4G14370]	ATP binding|nucleus|defense response|signal transduction|ADP binding|phosphatidylinositol binding
AT4G14390	2.14597	4.09769e-09	3.17107e-08	0.61574	1.08673	1.06081	0.224722	0.136619	0.273648		Ankyrin repeat family protein [Source:TAIR;Acc:AT4G14390]	molecular_function|biological_process|integral component of membrane|regulation of defense response|cellular response to salicylic acid stimulus|regulation of salicylic acid mediated signaling pathway
AT4G14400	6.78941	2.22925e-225	1.49201e-222	22.6844	21.8083	24.9397	0.433709	0.104113	0.14602	ACD6	ankyrin repeat family protein [Source:TAIR;Acc:AT4G14400]	cell death|response to salicylic acid|defense response to bacterium, incompatible interaction|regulation of salicylic acid mediated signaling pathway|response to light stimulus|response to bacterium|membrane|positive regulation of defense response to bacterium|integral component of plasma membrane|response to freezing|response to virus|regulation of defense response to fungus|positive regulation …
AT4G14680	1.08436	5.02591e-12	5.12101e-11	19.3661	18.3862	14.9031	9.20151	9.26846	7.50584	APS3	ATP-sulfurylase 3, chloroplastic [Source:UniProtKB/Swiss-Prot;Acc:O23324]	sulfate assimilation|adenylylsulfate kinase activity|sulfate adenylyltransferase (ATP) activity|ATP binding|chloroplast|chloroplast stroma|hydrogen sulfide biosynthetic process|cellular response to sulfate starvation|protein trimerization
AT4G14980	1.37744	0.00132451	0.00439968	0.767039	1.29048	0.929974	0.746041	0.288309	0.224926		Cysteine/Histidine-rich C1 domain family protein [Source:TAIR;Acc:AT4G14980]	intracellular signal transduction|metal ion binding|protein-disulfide reductase activity|oxidation-reduction process
AT4G15100	7.08719	1.26702e-16	1.84576e-15	1.11114	0.896214	1.32827	0.0341943	0	0	SCPL30	Putative serine carboxypeptidase-like 30 [Source:UniProtKB/Swiss-Prot;Acc:O23364]
AT4G15210	5.65865	3.0616e-41	1.32321e-39	2.45718	2.41668	1.89205	0.0681636	0.0230525	0.0464393	BAM5	Beta-amylase 5 [Source:UniProtKB/Swiss-Prot;Acc:P25853]	cytoplasm|chloroplast|beta-amylase activity|response to herbivore|cytosol|starch catabolic process
AT4G15233	2.08099	8.02832e-24	1.78598e-22	15.8916	17.7294	21.3916	4.01146	4.97962	4.67675		ABC-2 and Plant PDR ABC-type transporter family protein [Source:TAIR;Acc:AT4G15233]
AT4G15236	2.32116	1.03575e-23	2.28891e-22	1.49212	1.53378	1.65399	0.210088	0.428145	0.366217	ABCG43	ABC-2 and Plant PDR ABC-type transporter family protein [Source:TAIR;Acc:AT4G15236]	nucleus|plasma membrane|integral component of membrane|ATPase activity, coupled to transmembrane movement of substances
AT4G15270	3.08402	1.59118e-25	3.81899e-24	2.84578	3.0381	2.28743	0.506501	0.275312	0.369845		glucosyltransferase-related [Source:TAIR;Acc:AT4G15270]	metabolic process|transferase activity, transferring glycosyl groups|transferase activity, transferring hexosyl groups
AT4G15280	4.33424	1.78902e-31	5.49971e-30	2.30111	3.23316	3.0497	0.290081	0.0364183	0.0366723	UGT71B5	UDP-glycosyltransferase 71B5 [Source:UniProtKB/Swiss-Prot;Acc:O23382]	UDP-glycosyltransferase activity|flavonoid biosynthetic process|transferase activity, transferring glycosyl groups|intracellular membrane-bounded organelle|flavonoid glucuronidation|quercetin 7-O-glucosyltransferase activity|quercetin 3-O-glucosyltransferase activity
AT4G15300	1.89114	0.00249878	0.00778895	0.19292	0.636402	0.332189	0.125098	0.0320829	0	CYP702A2	cytochrome P450, family 702, subfamily A, polypeptide 2 [Source:TAIR;Acc:AT4G15300]	monooxygenase activity|iron ion binding|endoplasmic reticulum|multicellular organism development|brassinosteroid homeostasis|sterol metabolic process|brassinosteroid biosynthetic process|oxidoreductase activity, acting on paired donors, with incorporation or reduction of molecular oxygen|oxygen binding|heme binding|oxidation-reduction process
AT4G15330	1.30608	3.56907e-27	9.23817e-26	16.8923	18.5867	16.2881	7.13129	7.43731	7.80329	CYP705A1	cytochrome P450, family 705, subfamily A, polypeptide 1 [Source:TAIR;Acc:AT4G15330]	iron ion binding|membrane|integral component of membrane|oxidoreductase activity, acting on paired donors, with incorporation or reduction of molecular oxygen, NAD(P)H as one donor, and incorporation of one atom of oxygen|oxygen binding|heme binding|secondary metabolite biosynthetic process|oxidation-reduction process
AT4G15350	2.10549	0.000435443	0.00160457	0.438225	0.524111	0.83508	0.0904194	0.155274	0.22073	CYP705A2	cytochrome P450, family 705, subfamily A, polypeptide 2 [Source:TAIR;Acc:AT4G15350]	iron ion binding|membrane|oxidoreductase activity, acting on paired donors, with incorporation or reduction of molecular oxygen, NAD(P)H as one donor, and incorporation of one atom of oxygen|oxygen binding|heme binding|secondary metabolite biosynthetic process|oxidation-reduction process
AT4G15360	Inf	0.0231615	0.0557959	0	0.0861269	0.0896428	0	0	0	CYP705A3	cytochrome P450, family 705, subfamily A, polypeptide 3 [Source:TAIR;Acc:AT4G15360]	iron ion binding|membrane|integral component of membrane|oxidoreductase activity, acting on paired donors, with incorporation or reduction of molecular oxygen, NAD(P)H as one donor, and incorporation of one atom of oxygen|oxygen binding|heme binding|secondary metabolite biosynthetic process|oxidation-reduction process
AT4G15393	2.03053	6.14235e-11	5.66698e-10	7.24725	10.576	7.17753	2.37683	1.823	2.11122	CYP702A5	cytochrome P450, family 702, subfamily A, polypeptide 5 [Source:TAIR;Acc:AT4G15393]	monooxygenase activity|iron ion binding|multicellular organism development|brassinosteroid homeostasis|integral component of membrane|sterol metabolic process|brassinosteroid biosynthetic process|oxidoreductase activity, acting on paired donors, with incorporation or reduction of molecular oxygen|heme binding|oxidation-reduction process|endoplasmic reticulum
AT4G15440	2.64472	1.61167e-10	1.42843e-09	1.44471	1.63897	1.08559	0.340222	0.250838	0.126805	CYP74B2	Probable inactive linolenate hydroperoxide lyase [Source:UniProtKB/Swiss-Prot;Acc:B3LF83]
AT4G15490	1.25124	6.70067e-11	6.16751e-10	6.50207	6.04424	6.2097	3.98108	1.91018	2.49435	UGT84A3	UDP-glycosyltransferase 84A3 [Source:UniProtKB/Swiss-Prot;Acc:O23401]	UDP-glycosyltransferase activity|flavonoid biosynthetic process|transferase activity, transferring glycosyl groups|intracellular membrane-bounded organelle|hydroxycinnamate 4-beta-glucosyltransferase activity|flavonoid glucuronidation|quercetin 3-O-glucosyltransferase activity|quercetin 7-O-glucosyltransferase activity|sinapate 1-glucosyltransferase activity
AT4G15530	2.09537	1.48105e-68	1.34994e-66	82.2914	89.3184	96.8017	17.732	25.4934	23.8467	PPDK	Pyruvate, phosphate dikinase 1, chloroplastic [Source:UniProtKB/Swiss-Prot;Acc:O23404]	ATP binding|pyruvate metabolic process|chloroplast|photosynthesis|kinase activity|phosphorylation|metal ion binding|pyruvate, phosphate dikinase activity|chloroplast stroma|cytosol|nucleus
AT4G15620	1.11623	1.93571e-05	9.15213e-05	7.14382	5.68954	5.73614	3.62686	2.42477	2.80773		CASP-like protein 1E2 [Source:UniProtKB/Swiss-Prot;Acc:O23413]
AT4G15975	3.485	1.02459e-32	3.32424e-31	8.23665	8.82508	11.1177	1.14936	0.75528	0.694952	ATL17	RING/U-box superfamily protein [Source:TAIR;Acc:AT4G15975]	extracellular region|zinc ion binding|response to chitin
AT4G16220	2.01756	0.00425304	0.012565	0	0.233893	0	0	0	0.117454		GDSL-like Lipase/Acylhydrolase superfamily protein [Source:TAIR;Acc:AT4G16220]	extracellular region
AT4G16230	3.07029	0.00119753	0.00401489	0.0571851	0.0572281	0	0	0.0569368	0.0574814		GDSL-like Lipase/Acylhydrolase superfamily protein [Source:TAIR;Acc:AT4G16230]	extracellular region|carboxylic ester hydrolase activity
AT4G16240	4.97315	0.000148042	0.000597601	0	0	0	0	0	0		unknown protein; Has 17010 Blast hits to 4557 proteins in 509 species: Archae - 32; Bacteria - 2889; Metazoa - 6537; Fungi - 648; Plants - 4769; Viruses - 447; Other Eukaryotes - 1688 (source: NCBI BLink). [Source:TAIR;Acc:AT4G16240]	molecular_function|cellular_component|biological_process
AT4G16250	1.24591	4.39847e-25	1.0418e-23	7.62688	6.87029	7.61955	3.29313	3.30461	3.59628	PHYD	Phytochrome D [Source:UniProtKB/Swiss-Prot;Acc:P42497]	phosphorelay sensor kinase activity|signal transducer activity|transcription, DNA-templated|regulation of transcription, DNA-templated|G-protein coupled photoreceptor activity|detection of visible light|red, far-red light phototransduction|photoreceptor activity|protein-tetrapyrrole linkage|protein-chromophore linkage|protein homodimerization activity|protein binding|identical protein binding|nuc…
AT4G16260	2.72736	8.11413e-207	4.13203e-204	382.329	420.581	419.229	64.3729	57.5183	76.0274		Glycosyl hydrolase superfamily protein [Source:TAIR;Acc:AT4G16260]	hydrolase activity, hydrolyzing O-glycosyl compounds|extracellular space|carbohydrate metabolic process|glucan endo-1,3-beta-D-glucosidase activity|apoplast|cell wall|vacuolar membrane|response to salt stress|defense response to fungus, incompatible interaction|defense response to nematode
AT4G16760	1.41785	1.67865e-64	1.36536e-62	168.07	179.829	188.431	65.1823	73.7877	77.4999	ACX1	Peroxisomal acyl-coenzyme A oxidase 1 [Source:UniProtKB/Swiss-Prot;Acc:O65202]	fatty-acyl-CoA binding|acyl-CoA dehydrogenase activity|acyl-CoA oxidase activity|cytoplasm|peroxisome|fatty acid beta-oxidation|electron carrier activity|fatty acid beta-oxidation using acyl-CoA dehydrogenase|flavin adenine dinucleotide binding|oxidoreductase activity, acting on the CH-CH group of donors, with a flavin as acceptor|lipid homeostasis|long-chain fatty acid metabolic process|response…
AT4G16960	1.43237	1.95144e-24	4.49925e-23	2.57963	3.22765	3.15988	1.44697	1.08108	1.23109		Disease resistance protein (TIR-NBS-LRR class) family [Source:TAIR;Acc:AT4G16960]	ATP binding|defense response|signal transduction|ADP binding
AT4G17070	1.49241	5.64486e-36	2.03432e-34	23.416	26.2647	29.1309	10.6234	9.58382	10.118		peptidyl-prolyl cis-trans isomerases [Source:TAIR;Acc:AT4G17070]	protein peptidyl-prolyl isomerization|peptidyl-prolyl cis-trans isomerase activity|cytoplasm|protein folding|integral component of membrane|response to oxidative stress
AT4G17230	1.16969	5.72843e-25	1.35271e-23	33.4525	31.4342	36.5606	14.9379	14.9729	18.0294	SCL13	SCARECROW-like 13 [Source:TAIR;Acc:AT4G17230]	transcription factor activity, sequence-specific DNA binding|nucleus|sequence-specific DNA binding|regulation of transcription, DNA-templated|response to chitin
AT4G17240	1.45416	3.03875e-26	7.55656e-25	7.97018	8.10645	9.50958	3.01868	3.42433	4.04222		unknown protein; FUNCTIONS IN: molecular_function unknown; INVOLVED IN: biological_process unknown; LOCATED IN: chloroplast; EXPRESSED IN: 16 plant structures; EXPRESSED DURING: 8 growth stages; Has 1142 Blast hits to 1055 proteins in 252 species: A /.../- 22; Bacteria - 318; Metazoa - 248; Fungi - 96; Plants - 59; Viruses - 3; Other Eukaryotes - 396 (source: NCBI BLink). [Source:TAIR;Acc:AT4G172…	molecular_function|biological_process
AT4G17470	2.58172	2.42287e-23	5.25516e-22	11.4802	9.60911	7.58915	1.4931	2.25866	1.68442		alpha/beta-Hydrolases superfamily protein [Source:TAIR;Acc:AT4G17470]
AT4G17500	1.40625	7.43335e-50	4.12621e-48	98.7037	104.005	112.535	39.715	43.2167	44.7942	ERF1A	Ethylene-responsive transcription factor 1A [Source:UniProtKB/Swiss-Prot;Acc:O80337]
AT4G17660	Inf	5.62989e-18	8.99591e-17	0.84953	1.13827	1.14541	0	0	0		Protein kinase superfamily protein [Source:TAIR;Acc:AT4G17660]	protein serine/threonine kinase activity|ATP binding|plasma membrane|protein phosphorylation|kinase activity|phosphorylation
AT4G17720	1.00383	1.26699e-19	2.23657e-18	28.0122	30.2323	29.1661	16.5489	14.8901	14.7737		RNA-binding (RRM/RBD/RNP motifs) family protein [Source:TAIR;Acc:AT4G17720]	nucleotide binding|nucleic acid binding|nucleus|cytosol|response to cytokinin
AT4G17980	3.49511	0.0334958	0.0766399	0.435702	0	0.0896656	0	0	0.0875152	anac071	NAC domain containing protein 71 [Source:TAIR;Acc:AT4G17980]
AT4G18170	2.29677	1.6009e-58	1.14333e-56	20.1993	18.852	21.679	4.88423	3.24042	5.00952	WRKY28	Probable WRKY transcription factor 28 [Source:UniProtKB/Swiss-Prot;Acc:Q8VWJ2]	transcription factor activity, sequence-specific DNA binding|nucleus|transcription, DNA-templated|regulation of transcription, DNA-templated|sequence-specific DNA binding
AT4G18195	5.1712	0.00024211	0.000938045	0.287896	0.430735	0.846237	0.0474013	0	0	PUP8	Probable purine permease 8 [Source:UniProtKB/Swiss-Prot;Acc:Q0WRB9]	integral component of membrane|purine nucleobase transmembrane transporter activity|purine nucleobase transport|membrane
AT4G18197	1.52843	3.92345e-23	8.4241e-22	19.2937	16.774	19.7354	6.31313	5.68573	8.59201	PUP7	Probable purine permease 7 [Source:UniProtKB/Swiss-Prot;Acc:Q2V3H2]	integral component of membrane|purine nucleobase transmembrane transporter activity|purine nucleobase transport|membrane
AT4G18205	1.87831	1.45097e-36	5.32742e-35	37.9015	31.2416	34.8716	10.751	8.57663	10.8094	PUP21	Probable purine permease 21 [Source:UniProtKB/Swiss-Prot;Acc:Q8RY74]	transporter activity|transport|integral component of membrane
AT4G18250	7.13438	5.09479e-65	4.20231e-63	18.2318	18.7535	26.1793	0.220189	0.146995	0.0738989		receptor serine/threonine kinase, putative [Source:TAIR;Acc:AT4G18250]	protein serine/threonine kinase activity|transmembrane receptor protein serine/threonine kinase activity|ATP binding|protein phosphorylation|integral component of membrane|kinase activity|phosphorylation
AT4G18280	1.70799	3.28523e-21	6.34955e-20	15.022	15.9123	15.956	5.33797	4.98895	4.86838		glycine-rich cell wall protein-related [Source:TAIR;Acc:AT4G18280]	molecular_function|cellular_component|biological_process
AT4G18930	1.08621	3.78249e-21	7.29258e-20	53.6255	56.1907	52.4301	26.7573	27.1381	27.055		Cyclic phosphodiesterase [Source:UniProtKB/Swiss-Prot;Acc:O04147]	cyclic-nucleotide phosphodiesterase activity|cytoplasm|tRNA splicing, via endonucleolytic cleavage and ligation
AT4G19370	1.18378	3.42e-05	0.000154809	2.97105	2.82966	2.8683	1.63289	1.17805	1.59576		Protein of unknown function (DUF1218) [Source:TAIR;Acc:AT4G19370]
AT4G19390	1.0479	1.00023e-09	8.30272e-09	10.2139	10.5937	11.3335	4.14384	5.87376	5.38187		Uncharacterised protein family (UPF0114) [Source:TAIR;Acc:AT4G19390]	molecular_function|plasma membrane|biological_process|integral component of membrane|chloroplast envelope
AT4G19410	1.18225	1.54282e-32	4.9849e-31	59.9361	67.4973	72.645	33.7961	31.6727	29.9759	PAE7	Pectin acetylesterase 7 [Source:UniProtKB/Swiss-Prot;Acc:Q940J8]	extracellular region|hydrolase activity|carboxylic ester hydrolase activity|cell wall organization|cell wall|plant-type cell wall|membrane|plasmodesma
AT4G19460	1.07864	3.49951e-07	2.15443e-06	3.73814	3.1249	4.00058	2.14672	1.94606	1.42716		UDP-Glycosyltransferase superfamily protein [Source:TAIR;Acc:AT4G19460]	nucleus|integral component of membrane|transferase activity|transferase activity, transferring glycosyl groups
AT4G19520	2.60312	2.96596e-40	1.23846e-38	6.84073	6.85629	8.33741	1.0506	1.07072	1.70331		disease resistance protein (TIR-NBS-LRR class) family [Source:TAIR;Acc:AT4G19520]	nucleus|defense response|signal transduction|ADP binding|cellular response to hypoxia
AT4G19750	Inf	9.69967e-05	0.000403865	0.668211	0.431631	1.18471	0	0	0		Glycosyl hydrolase family protein with chitinase insertion domain [Source:TAIR;Acc:AT4G19750]	hydrolase activity, hydrolyzing O-glycosyl compounds|carbohydrate metabolic process
AT4G19760	Inf	0.0461205	0.100697	0.0944882	0.047453	0.488797	0	0	0		Glycosyl hydrolase family protein with chitinase insertion domain [Source:TAIR;Acc:AT4G19760]	hydrolase activity, hydrolyzing O-glycosyl compounds|nucleus|carbohydrate metabolic process
AT4G19880	1.00776	2.97591e-29	8.50131e-28	63.7743	61.4038	68.2965	40.2827	31.5327	31.6772		Glutathione S-transferase family protein [Source:TAIR;Acc:AT4G19880]	transferase activity|response to cadmium ion|cytosol
AT4G19920	1.22164	0.000194647	0.000768777	2.01362	2.91963	1.94388	0.592591	0.991206	1.45218		Toll-Interleukin-Resistance (TIR) domain family protein [Source:TAIR;Acc:AT4G19920]	defense response|signal transduction
AT4G19980	1.83089	0.0318833	0.0735104	1.49794	0.79213	2.66668	0.526284	0.506622	0.519561		unknown protein; FUNCTIONS IN: molecular_function unknown; INVOLVED IN: biological_process unknown; LOCATED IN: chloroplast; EXPRESSED IN: root, pedicel; EXPRESSED DURING: 4 anthesis; Has 30201 Blast hits to 17322 proteins in 780 species: Archae - 1 /.../teria - 1396; Metazoa - 17338; Fungi - 3422; Plants - 5037; Viruses - 0; Other Eukaryotes - 2996 (source: NCBI BLink). [Source:TAIR;Acc:AT4G1998…	molecular_function|mitochondrion|biological_process
AT4G20210	1.31395	3.57208e-05	0.000161132	1.1297	1.4566	1.22305	0.440809	0.81612	0.368667	TPS08	Terpenoid synthase 8 [Source:UniProtKB/Swiss-Prot;Acc:O65435]	magnesium ion binding|cytoplasm|terpene synthase activity|terpenoid biosynthetic process
AT4G20830	1.38947	2.02516e-14	2.53822e-13	99.5445	107.214	128.607	42.7938	41.1236	52.8525		Reticuline oxidase-like protein [Source:UniProtKB/Swiss-Prot;Acc:Q9SVG4]	electron carrier activity|chloroplast|oxidoreductase activity, acting on CH-OH group of donors|anchored component of membrane|flavin adenine dinucleotide binding|oxidation-reduction process|plasma membrane|vacuole|mitochondrion|response to oxidative stress|plant-type cell wall|apoplast|cytosol|plasmodesma
AT4G20970	5.4311	3.34404e-12	3.47534e-11	1.61464	1.39229	2.00674	0	0	0		basic helix-loop-helix (bHLH) DNA-binding superfamily protein [Source:TAIR;Acc:AT4G20970]	DNA binding|nucleus|protein dimerization activity|transcription factor activity, sequence-specific DNA binding|regulation of transcription, DNA-templated|defense response to fungus
AT4G21120	1.00486	4.58545e-07	2.77987e-06	6.75901	7.61283	8.96009	3.60705	3.89003	4.85566	CAT1	Cationic amino acid transporter 1 [Source:UniProtKB/Swiss-Prot;Acc:Q84MA5]	catalase activity|nucleus|heme binding|oxidation-reduction process|chloroplast envelope|peroxisome|protein binding|mitochondrion|cellular response to nitrogen starvation|cellular response to sulfate starvation|cellular response to phosphate starvation|response to light stimulus|cytosolic ribosome|cell wall|response to cadmium ion|response to abscisic acid|response to hydrogen peroxide|cobalt ion …
AT4G21380	5.56956	1.21657e-79	1.40385e-77	6.75235	7.28875	8.54371	0.190687	0.0898673	0.165393	SD18	Receptor-like serine/threonine-protein kinase SD1-8 [Source:UniProtKB/Swiss-Prot;Acc:O81905]
AT4G21390	2.01721	7.87814e-60	5.74908e-58	10.6315	11.0384	11.8013	2.95958	2.58001	3.12728	B120	G-type lectin S-receptor-like serine/threonine-protein kinase B120 [Source:UniProtKB/Swiss-Prot;Acc:O81906]	protein kinase activity|protein serine/threonine kinase activity|ATP binding|plasma membrane|protein phosphorylation|defense response|plasmodesma|integral component of membrane|carbohydrate binding|recognition of pollen
AT4G21500	1.06967	2.2829e-05	0.000106698	4.81688	3.91286	5.82528	2.52566	2.84742	2.40757		unknown protein; FUNCTIONS IN: molecular_function unknown; INVOLVED IN: biological_process unknown; LOCATED IN: endomembrane system; BEST Arabidopsis thaliana protein match is: unknown protein (TAIR:AT4G05018.1); Has 20 Blast hits to 20 proteins in /.../ies: Archae - 0; Bacteria - 0; Metazoa - 0; Fungi - 0; Plants - 17; Viruses - 0; Other Eukaryotes - 3 (source: NCBI BLink). [Source:TAIR;Acc:AT4G…	molecular_function|biological_process|chloroplast|integral component of membrane
AT4G21610	1.00163	5.90691e-05	0.000255861	4.8851	7.18624	8.66808	4.25708	3.52121	3.84638	LOL2	Protein LOL2 [Source:UniProtKB/Swiss-Prot;Acc:O65426]	nucleus|response to bacterium
AT4G21680	3.93828	6.05982e-22	1.22266e-20	21.2074	26.347	33.8401	1.37351	2.11456	2.274	NPF7.2	Protein NRT1/ PTR FAMILY 7.2 [Source:UniProtKB/Swiss-Prot;Acc:Q8GXN2]	transporter activity|plasma membrane|oligopeptide transport|symporter activity|membrane|integral component of membrane|nitrate assimilation|response to nitrate|nitrate transmembrane transporter activity|response to cadmium ion
AT4G21830	2.46593	2.88171e-55	1.89087e-53	88.1588	80.0621	73.4637	19.6267	16.4772	10.9087	MSRB7	Peptide methionine sulfoxide reductase B7 [Source:UniProtKB/Swiss-Prot;Acc:Q8VY86]	chloroplast|protein repair|peptide-methionine (R)-S-oxide reductase activity|metal ion binding|oxidation-reduction process|cytosol|peptide-methionine (S)-S-oxide reductase activity|response to singlet oxygen
AT4G21840	6.48472	4.78776e-24	1.08361e-22	44.9917	24.94	39.7555	0.241285	0.728405	0.492413	MSRB8	Peptide methionine sulfoxide reductase B8 [Source:UniProtKB/Swiss-Prot;Acc:O49707]	cytosol|response to oxidative stress|chloroplast|protein repair|peptide-methionine (R)-S-oxide reductase activity|metal ion binding|oxidation-reduction process|peptide-methionine (S)-S-oxide reductase activity
AT4G21850	2.6732	8.63679e-198	3.967e-195	358.188	354.45	369.325	57.0564	64.3394	62.2132	MSRB9	Peptide methionine sulfoxide reductase B9 [Source:UniProtKB/Swiss-Prot;Acc:Q84JT6]	cytoplasm|response to oxidative stress|protein repair|peptide-methionine (R)-S-oxide reductase activity|metal ion binding|oxidation-reduction process|cytosol
AT4G21865	1.63293	1.93566e-10	1.70206e-09	7.12761	6.65764	6.55301	3.29361	1.18695	1.99492		unknown protein; Has 11 Blast hits to 11 proteins in 4 species: Archae - 0; Bacteria - 0; Metazoa - 0; Fungi - 0; Plants - 11; Viruses - 0; Other Eukaryotes - 0 (source: NCBI BLink). [Source:TAIR;Acc:AT4G21865]	molecular_function|nucleus|biological_process
AT4G21903	1.9755	2.52308e-14	3.13711e-13	3.12581	2.33141	2.17173	0.793279	0.456791	0.941766		MATE efflux family protein [Source:TAIR;Acc:AT4G21903]	plasma membrane|drug transmembrane transport|drug transmembrane transporter activity|antiporter activity|integral component of membrane
AT4G21910	1.04757	2.16639e-24	4.98994e-23	18.4518	16.8182	16.6691	10.5235	8.43381	8.46101		MATE efflux family protein [Source:TAIR;Acc:AT4G21910]	transporter activity|plasma membrane|drug transmembrane transport|drug transmembrane transporter activity|antiporter activity|membrane|integral component of membrane
AT4G21920	4.38665	1.75789e-16	2.53095e-15	3.77695	5.06783	7.38561	0.368779	0.175793	0		unknown protein; FUNCTIONS IN: molecular_function unknown; INVOLVED IN: N-terminal protein myristoylation; LOCATED IN: cellular_component unknown; BEST Arabidopsis thaliana protein match is: unknown protein (TAIR:AT3G20340.1); Has 40 Blast hits to 4 /.../eins in 10 species: Archae - 0; Bacteria - 0; Metazoa - 0; Fungi - 0; Plants - 40; Viruses - 0; Other Eukaryotes - 0 (source: NCBI BLink). [Sour…	molecular_function|nucleus
AT4G22210	Inf	5.09105e-06	2.64606e-05	1.90425	0	0	0	0	0	LCR85	Defensin-like protein 97 [Source:UniProtKB/Swiss-Prot;Acc:P82794]	molecular_function|extracellular region|killing of cells of other organism|defense response to fungus
AT4G22212	1.40798	1.79883e-25	4.29975e-24	152.663	177.867	139.64	68.7725	59.5611	60.5733		Defensin-like protein 98 [Source:UniProtKB/Swiss-Prot;Acc:Q94AZ8]	extracellular region|killing of cells of other organism|defense response to fungus
AT4G22214	1.38834	6.79712e-06	3.46512e-05	21.3796	26.1422	15.5321	10.1473	8.92274	7.67786		Defensin-like protein 99 [Source:UniProtKB/Swiss-Prot;Acc:Q7X6T3]	extracellular region|killing of cells of other organism|defense response to fungus
AT4G22305	2.09729	5.2762e-21	1.00565e-19	9.39543	10.6802	13.7311	2.86281	2.04354	2.95759		alpha/beta-Hydrolases superfamily protein [Source:TAIR;Acc:AT4G22305]	cytoplasm|fatty acid metabolic process|defense response to bacterium, incompatible interaction|short-chain carboxylesterase activity|phospholipase A2 activity|phosphatidic acid biosynthetic process
AT4G22470	4.67195	9.32451e-51	5.27601e-49	79.2678	94.2395	107.943	2.2379	3.78714	5.38836		protease inhibitor/seed storage/lipid transfer protein (LTP) family protein [Source:TAIR;Acc:AT4G22470]	proteolysis|lipid transport|peptidase activity|lipid binding
AT4G22513	1.1714	0.00432808	0.0127577	77.169	43.0356	77.792	45.8527	24.9562	23.9037		Bifunctional inhibitor/lipid-transfer protein/seed storage 2S albumin superfamily protein [Source:TAIR;Acc:AT4G22513]
AT4G22517	1.02278	0.0255436	0.0608088	75.5707	37.2881	76.0195	46.6246	24.8165	29.7074		Bifunctional inhibitor/lipid-transfer protein/seed storage 2S albumin superfamily protein [Source:TAIR;Acc:AT4G22517]	extracellular region|proteolysis|peptidase activity
AT4G22520	1.10567	0.00858512	0.0234199	14.0709	6.11121	12.1305	6.34591	3.99086	6.98414		Bifunctional inhibitor/lipid-transfer protein/seed storage 2S albumin superfamily protein [Source:TAIR;Acc:AT4G22520]	extracellular region|proteolysis|lipid transport|peptidase activity|lipid binding
AT4G22530	1.77751	1.06485e-21	2.11391e-20	19.2082	17.6627	22.8046	8.08123	5.52373	5.32227		S-adenosyl-L-methionine-dependent methyltransferases superfamily protein [Source:TAIR;Acc:AT4G22530]	cytoplasm|cytosol|nucleus
AT4G22610	1.42005	5.83137e-12	5.893e-11	46.618	56.2263	46.6141	27.5067	13.591	18.8319		Bifunctional inhibitor/lipid-transfer protein/seed storage 2S albumin superfamily protein [Source:TAIR;Acc:AT4G22610]	extracellular region|proteolysis|lipid transport|peptidase activity|lipid binding
AT4G22620	1.85628	0.0312847	0.072301	1.16821	0.586396	0.451867	0.14722	0.146541	0.296837		SAUR-like auxin-responsive protein family [Source:TAIR;Acc:AT4G22620]
AT4G22690	2.498	2.97843e-161	9.96712e-159	109.58	101.95	111.987	19.6814	17.9872	23.1751	CYP706A1	cytochrome P450, family 706, subfamily A, polypeptide 1 [Source:TAIR;Acc:AT4G22690]	iron ion binding|chloroplast|oxidoreductase activity, acting on paired donors, with incorporation or reduction of molecular oxygen, NAD(P)H as one donor, and incorporation of one atom of oxygen|oxygen binding|heme binding|secondary metabolite biosynthetic process|oxidation-reduction process|mitochondrion|cell wall|vacuolar membrane|plasma membrane|Golgi apparatus
AT4G22710	5.77489	4.06327e-30	1.19127e-28	7.08242	6.64119	9.9855	0.161482	0.163086	0.138038	CYP706A2	cytochrome P450, family 706, subfamily A, polypeptide 2 [Source:TAIR;Acc:AT4G22710]	iron ion binding|chloroplast|integral component of membrane|oxidoreductase activity, acting on paired donors, with incorporation or reduction of molecular oxygen, NAD(P)H as one donor, and incorporation of one atom of oxygen|oxygen binding|heme binding|secondary metabolite biosynthetic process|oxidation-reduction process|plasma membrane|plasmodesma|Golgi apparatus
AT4G22753	3.13275	1.96453e-68	1.7768e-66	16.2689	16.41	17.9105	6.46893	7.44342	8.46121	SMO1-3	Methylsterol monooxygenase 1-3 [Source:UniProtKB/Swiss-Prot;Acc:F4JLZ6]	C-4 methylsterol oxidase activity|catalytic activity|iron ion binding|nucleus|endoplasmic reticulum membrane|fatty acid biosynthetic process|integral component of membrane|sterol biosynthetic process|4,4-dimethyl-9beta,19-cyclopropylsterol oxidation
AT4G22880	3.16036	3.49057e-05	0.000157759	14.2984	7.98865	6.14984	1.13712	1.27701	1.08251	LDOX	Leucoanthocyanidin dioxygenase [Source:UniProtKB/Swiss-Prot;Acc:Q96323]	cytoplasm|anthocyanin-containing compound biosynthetic process|L-ascorbic acid binding|metal ion binding|dioxygenase activity|oxidation-reduction process|vacuole organization|proanthocyanidin biosynthetic process|response to wounding|response to jasmonic acid|leucocyanidin oxygenase activity
AT4G22980	1.6725	3.51023e-08	2.44651e-07	1.79727	1.92791	2.00657	0.492642	0.652128	0.783532		FUNCTIONS IN: molecular_function unknown; INVOLVED IN: biological_process unknown; LOCATED IN: chloroplast; EXPRESSED IN: 13 plant structures; EXPRESSED DURING: 9 growth stages; BEST Arabidopsis thaliana protein match is: Pyridoxal phosphate (PLP)-d /.../nt transferases superfamily protein (TAIR:AT5G51920.1); Has 520 Blast hits to 468 proteins in 130 species: Archae - 5; Bacteria - 23; Metazoa - …	molecular_function|biological_process
AT4G23010	1.14351	2.87089e-24	6.58674e-23	38.7026	44.2246	46.8551	22.8571	18.0142	21.8945	UTR2	UDP-galactose/UDP-glucose transporter 2 [Source:UniProtKB/Swiss-Prot;Acc:Q29Q28]	plasma membrane|integral component of endoplasmic reticulum membrane|3'-phosphoadenosine 5'-phosphosulfate transmembrane transporter activity|UDP-galactose transmembrane transporter activity|integral component of Golgi membrane|UDP-galactose transmembrane transport
AT4G23100	1.30802	6.90474e-56	4.62124e-54	169.027	170.69	175.703	75.9546	72.7222	72.4329	GSH1	Glutamate--cysteine ligase, chloroplastic [Source:UniProtKB/Swiss-Prot;Acc:P46309]	glutamate-cysteine ligase activity|ATP binding|glutathione biosynthetic process|chloroplast|flower development|response to heat|chloroplast stroma|response to jasmonic acid|response to ozone|response to cadmium ion|defense response to fungus|defense response to insect|glucosinolate biosynthetic process|defense response to bacterium|defense response by callose deposition in cell wall|plastid|indol…
AT4G23130	4.80075	1.21424e-93	1.77772e-91	6.10904	5.60398	5.9614	0.230769	0.307055	0.118845	CRK5	Cysteine-rich receptor-like protein kinase 5 [Source:UniProtKB/Swiss-Prot;Acc:Q9C5S8]	protein serine/threonine kinase activity|ATP binding|plasma membrane|protein phosphorylation|defense response|plasmodesma|integral component of membrane|kinase activity|response to salicylic acid|programmed cell death|defense response to bacterium
AT4G23140	Inf	1.81751e-72	1.81945e-70	3.99537	3.71712	4.83983	0	0	0	CRK6	Cysteine-rich receptor-like protein kinase 6 [Source:UniProtKB/Swiss-Prot;Acc:Q9C5S9]	protein serine/threonine kinase activity|ATP binding|protein phosphorylation|plasmodesma|chloroplast|integral component of membrane|kinase activity|defense response to bacterium|plasma membrane|response to reactive oxygen species|protein kinase activity|protein binding
AT4G23150	Inf	3.44418e-62	2.6366e-60	2.85788	2.93264	2.99429	0	0	0	CRK7	Cysteine-rich receptor-like protein kinase 7 [Source:UniProtKB/Swiss-Prot;Acc:Q8L7G3]	protein serine/threonine kinase activity|ATP binding|extracellular region|plasma membrane|protein phosphorylation|plasmodesma|integral component of membrane|kinase activity|defense response to bacterium|response to reactive oxygen species|protein kinase activity
AT4G23170	5.12569	3.59926e-63	2.83881e-61	26.6602	27.8846	34.9014	0.577794	0.85546	1.30098	CRK9	Putative cysteine-rich receptor-like protein kinase 9 [Source:UniProtKB/Swiss-Prot;Acc:O65469]
AT4G23200	3.54369	9.32817e-55	6.00309e-53	10.6065	11.6827	14.0375	1.49691	0.984509	0.962495	CRK12	cysteine-rich RLK (RECEPTOR-like protein kinase) 12 [Source:TAIR;Acc:AT4G23200]	protein kinase activity|protein serine/threonine kinase activity|extracellular region|plasma membrane|protein phosphorylation|plasmodesma|defense response to bacterium|vacuole
AT4G23210	5.86451	2.89618e-62	2.22436e-60	27.1766	30.1997	36.8617	0.325654	0.598782	0.747393	CRK13	Cysteine-rich receptor-like protein kinase 13 [Source:UniProtKB/Swiss-Prot;Acc:Q0PW40]	protein serine/threonine kinase activity|ATP binding|extracellular region|plasma membrane|protein phosphorylation|plasmodesma|integral component of membrane|kinase activity|response to molecule of bacterial origin|plant-type hypersensitive response|defense response to bacterium
AT4G23220	4.30959	3.82559e-53	2.34593e-51	10.2179	11.9142	13.1857	0.810682	0.385344	0.604539	CRK14	cysteine-rich RLK (RECEPTOR-like protein kinase) 14 [Source:TAIR;Acc:AT4G23220]	protein serine/threonine kinase activity|plasma membrane|protein phosphorylation|plasmodesma|kinase activity|defense response to bacterium
AT4G23230	6.83098	5.34492e-60	3.93725e-58	2.56207	2.98692	3.22517	0.0716514	0.0239839	0	CRK15	cysteine-rich RLK (RECEPTOR-like protein kinase) 15 [Source:TAIR;Acc:AT4G23230]	protein serine/threonine kinase activity|mitochondrion|plasma membrane|protein phosphorylation|plasmodesma|kinase activity|defense response to bacterium
AT4G23250	1.54391	2.07783e-36	7.5697e-35	7.71647	7.59924	8.66162	3.18685	2.96629	2.68191	EMB1290	kinases;protein kinases [Source:TAIR;Acc:AT4G23250]	protein serine/threonine kinase activity|extracellular region|plasmodesma|embryo development ending in seed dormancy|kinase activity|defense response to bacterium|plasma membrane|protein kinase activity|protein autophosphorylation
AT4G23260	3.37733	5.03047e-132	1.26708e-129	14.7575	13.9049	14.4368	1.68506	1.68458	1.19038	CRK18	cysteine-rich RLK (RECEPTOR-like protein kinase) 18 [Source:TAIR;Acc:AT4G23260]	protein kinase activity|protein serine/threonine kinase activity|ATP binding|extracellular region|plasma membrane|protein phosphorylation|plasmodesma|integral component of membrane|defense response to bacterium|response to abscisic acid
AT4G23270	1.00927	1.63406e-25	3.91389e-24	31.107	31.9561	33.7841	16.8382	16.5637	17.812	CRK19	Cysteine-rich receptor-like protein kinase 19 [Source:UniProtKB/Swiss-Prot;Acc:Q8GWJ7]	protein kinase activity|protein serine/threonine kinase activity|ATP binding|extracellular region|protein phosphorylation|plasmodesma|integral component of membrane|response to salicylic acid|defense response to bacterium|plasma membrane
AT4G23280	4.30979	5.93148e-12	5.98643e-11	0.420647	0.463422	0.558752	0	0.0735945	0.0494792	CRK20	cysteine-rich RLK (RECEPTOR-like protein kinase) 20 [Source:TAIR;Acc:AT4G23280]	protein serine/threonine kinase activity|extracellular region|plasma membrane|protein phosphorylation|plasmodesma|kinase activity|defense response|response to salicylic acid|programmed cell death|defense response to bacterium|chloroplast
AT4G23300	1.01483	3.27006e-19	5.61181e-18	13.7692	16.458	16.0197	9.08416	7.60717	7.64609	CRK22	Cysteine-rich receptor-like protein kinase 22 [Source:UniProtKB/Swiss-Prot;Acc:Q6NQ87]	protein serine/threonine kinase activity|ATP binding|extracellular region|plasma membrane|protein phosphorylation|plasmodesma|integral component of membrane|kinase activity|defense response to bacterium
AT4G23310	Inf	6.72566e-08	4.54293e-07	0.185233	0.220407	0.171684	0	0	0	CRK23	Putative cysteine-rich receptor-like protein kinase 23 [Source:UniProtKB/Swiss-Prot;Acc:O65482]	protein serine/threonine kinase activity|ATP binding|extracellular region|plasma membrane|protein phosphorylation|plasmodesma|integral component of membrane|defense response to bacterium|defense response
AT4G23320	4.83064	1.74492e-07	1.12201e-06	0.212174	0.456005	0.256589	0.0347556	0	0	CRK24	cysteine-rich RLK (RECEPTOR-like protein kinase) 24 [Source:TAIR;Acc:AT4G23320]	protein serine/threonine kinase activity|extracellular region|plasma membrane|protein phosphorylation|plasmodesma|kinase activity|defense response to bacterium
AT4G23515	1.91073	3.60845e-07	2.21683e-06	1.82391	1.88074	1.32239	0.492479	0.110672	0.613926		Toll-Interleukin-Resistance (TIR) domain family protein [Source:TAIR;Acc:AT4G23515]	transmembrane signaling receptor activity|cytoplasm|defense response|signal transduction|integral component of membrane|membrane
AT4G23570	2.13149	1.05731e-47	5.45541e-46	43.5941	39.6535	49.3555	9.43514	11.0079	11.4664	SGT1A	Protein SGT1 homolog A [Source:UniProtKB/Swiss-Prot;Acc:Q9SUR9]	nucleus|innate immune response|protein binding|ubiquitin-dependent protein catabolic process|SCF ubiquitin ligase complex|defense response|cellular response to auxin stimulus|regulation of defense response to fungus, incompatible interaction
AT4G23590	1.07247	3.98998e-09	3.09693e-08	4.70675	5.77771	5.75615	2.07834	3.38863	2.84756		Probable aminotransferase TAT4 [Source:UniProtKB/Swiss-Prot;Acc:Q8VYP2]	cytoplasm|cellular amino acid metabolic process|transaminase activity|biosynthetic process|pyridoxal phosphate binding
AT4G23600	5.77471	0	0	60.4522	59.9059	62.1942	1.73169	0.888685	0.925503	CORI3	Cystine lyase CORI3 [Source:UniProtKB/Swiss-Prot;Acc:Q9SUR6]	cytoplasm|cellular amino acid metabolic process|transaminase activity|biosynthetic process|lyase activity|pyridoxal phosphate binding|response to jasmonic acid|response to microbial phytotoxin|L-alanine:2-oxoglutarate aminotransferase activity|L-aspartate:2-oxoglutarate aminotransferase activity|cystathionine beta-lyase activity|L-tyrosine:2-oxoglutarate aminotransferase activity|hyperosmotic sal…
AT4G23610	6.39508	7.23338e-24	1.61373e-22	3.32389	3.63281	3.71032	0.0695324	0	0.0712934		Late embryogenesis abundant (LEA) hydroxyproline-rich glycoprotein family [Source:TAIR;Acc:AT4G23610]	molecular_function|biological_process|integral component of membrane
AT4G23810	1.97011	5.46071e-10	4.63468e-09	10.9064	12.9104	16.199	2.7614	2.70637	5.21684	WRKY53	Probable WRKY transcription factor 53 [Source:UniProtKB/Swiss-Prot;Acc:Q9SUP6]	transcription factor activity, sequence-specific DNA binding|nucleus|transcription, DNA-templated|sequence-specific DNA binding|regulation of transcription, DNA-templated|DNA binding|positive regulation of transcription, DNA-templated|regulation of defense response|protein binding|response to chitin|defense response to bacterium, incompatible interaction|chloroplast|leaf senescence|response to sa…
AT4G24110	2.55006	1.56743e-26	3.92696e-25	6.5656	8.70698	8.88861	0.736953	1.66736	1.86954		unknown protein; Has 76 Blast hits to 76 proteins in 13 species: Archae - 0; Bacteria - 0; Metazoa - 1; Fungi - 0; Plants - 75; Viruses - 0; Other Eukaryotes - 0 (source: NCBI BLink). [Source:TAIR;Acc:AT4G24110]	molecular_function|integral component of membrane|response to karrikin
AT4G24120	1.32965	2.85744e-24	6.56231e-23	10.3682	9.96035	11.6092	4.59351	5.11311	3.96973	YSL1	Metal-nicotianamine transporter YSL1 [Source:UniProtKB/Swiss-Prot;Acc:Q6R3L0]	plasma membrane|ion transport|oligopeptide transport|oligopeptide transporter activity|integral component of membrane|iron ion homeostasis|transmembrane transport|response to iron ion|developmental process involved in reproduction|seed development|iron-nicotianamine transmembrane transporter activity
AT4G24340	1.52532	4.023e-40	1.67387e-38	38.2894	38.4166	32.8874	13.9905	11.9675	12.4527		Phosphorylase superfamily protein [Source:TAIR;Acc:AT4G24340]	catalytic activity|plasma membrane|nucleoside metabolic process
AT4G24350	2.91708	5.98445e-111	1.12149e-108	64.4852	54.5567	55.8584	8.768	8.5399	7.69654		Phosphorylase superfamily protein [Source:TAIR;Acc:AT4G24350]	catalytic activity|extracellular region|nucleoside metabolic process|nutrient reservoir activity|plant-type cell wall|response to wounding
AT4G24380	1.20943	2.59117e-20	4.75691e-19	15.8925	21.4708	18.6904	8.44595	6.71104	8.74836		INVOLVED IN: 10-formyltetrahydrofolate biosynthetic process, folic acid and derivative biosynthetic process; EXPRESSED IN: 24 plant structures; EXPRESSED DURING: 15 growth stages; CONTAINS InterPro DOMAIN/s: Serine hydrolase (InterPro:IPR005645); BE /.../bidopsis thaliana protein match is: alpha/beta-Hydrolases superfamily protein (TAIR:AT5G65400.1); Has 30201 Blast hits to 17322 proteins in 780 …	chloroplast
AT4G24920	1.05561	3.24413e-27	8.43438e-26	170.138	193.074	201.346	104.502	93.1575	97.3222	SEC61G2	Protein transport protein Sec61 subunit gamma-1 [Source:UniProtKB/Swiss-Prot;Acc:P0DI74]	intracellular|cell|protein targeting|intracellular protein transport
AT4G25020	1.02625	0.0113724	0.0300371	1.09672	0.773637	1.00621	0.551252	0.407374	0.503284		D111/G-patch domain-containing protein [Source:TAIR;Acc:AT4G25020]	nucleic acid binding|intracellular|nucleus|biological_process
AT4G25070	1.70161	1.49051e-17	2.32768e-16	5.70023	7.44977	8.0639	2.36459	2.23441	2.3606		unknown protein; EXPRESSED IN: cultured cell; BEST Arabidopsis thaliana protein match is: unknown protein (TAIR:AT3G48860.2); Has 14837 Blast hits to 10961 proteins in 1163 species: Archae - 189; Bacteria - 1924; Metazoa - 7665; Fungi - 1127; Plants /.../; Viruses - 80; Other Eukaryotes - 3199 (source: NCBI BLink). [Source:TAIR;Acc:AT4G25070]	chloroplast
AT4G25100	1.64838	3.07287e-89	4.11326e-87	545.337	519.906	517.689	147.236	185.802	184.877	FSD1	Superoxide dismutase [Fe] 1, chloroplastic [Source:UniProtKB/Swiss-Prot;Acc:P21276]	superoxide dismutase activity|mitochondrion|chloroplast|chloroplast membrane|metal ion binding|oxidation-reduction process|thylakoid|response to oxidative stress|chloroplast envelope|plasma membrane|response to copper ion|chloroplast stroma|copper ion binding|cytoplasm|response to cadmium ion|cytosol|removal of superoxide radicals|protein binding|circadian rhythm|response to light intensity|respo…
AT4G25110	3.991	5.99613e-33	1.96998e-31	10.9487	12.5604	15.1209	1.10814	0.556847	0.98194	AMC2	Metacaspase-2 [Source:UniProtKB/Swiss-Prot;Acc:Q7XJE5]
AT4G25140	2.45409	0.028908	0.0676292	0.339675	0.400004	0.408993	0.115537	0.111578	0	OLEO1	Oleosin 18.5 kDa [Source:UniProtKB/Swiss-Prot;Acc:P29525]	molecular_function|extracellular region|mitochondrion|monolayer-surrounded lipid storage body|membrane|integral component of membrane|lipid storage|sexual reproduction|seed oilbody biogenesis|seed germination|response to freezing
AT4G25310	1.98235	0.000445062	0.00163744	0.621426	0.945273	0.81279	0.243948	0.288593	0.166534		2-oxoglutarate (2OG) and Fe(II)-dependent oxygenase superfamily protein [Source:TAIR;Acc:AT4G25310]	cytoplasm|flavonoid biosynthetic process|oxidoreductase activity, acting on paired donors, with incorporation or reduction of molecular oxygen, 2-oxoglutarate as one donor, and incorporation of one atom each of oxygen into both donors|metal ion binding|oxidation-reduction process
AT4G25350	1.60602	5.95285e-08	4.04894e-07	0.95962	1.14247	1.26676	0.659754	0.35914	0.385352	PHO1-H4	Phosphate transporter PHO1 homolog 4 [Source:UniProtKB/Swiss-Prot;Acc:Q6R8G6]
[truncated: 2,112 more rows]
