# Supplementary material for: Receptor kinase FERONIA regulates flowering time in Arabidopsis
Source: BMC Plant Biol. 2020 Jan 16;20:26. doi: 10.1186/s12870-019-2223-y (PMC6966814; doi:10.1186/s12870-019-2223-y)
Supplement: Supplementary file 10 — Additional file 10: Table S2. Genes with alternative splicing events in fer-4 plant as determined by RNA-seq analysis. [file 12870_2019_2223_MOESM10_ESM.xls]

## Sheet: fer-4 v.s. WT splicing change
Genes with alternative splicing events in fer-4 plant as determined by RNA-seq analysis
AS Type	GeneID	chr	strand	longExonStart_0base	longExonEnd	shortES	shortEE	flankingES	flankingEE	PValue	FDR	IncLevel1	IncLevel2	IncLevelDifference	Name	description
A3SS	AT5G26180	5	+	9152070	9152270	9152116	9152270	9151833	9151914	3.10862e-14	2.72958e-10	1.0,1.0,1.0	0.0,0.161,0.434	0.802		S-adenosyl-L-methionine-dependent methyltransferases superfamily protein [Source:TAIR;Acc:AT5G26180]
A3SS	AT4G01935	4	+	841779	841879	841782	841879	841497	841582	4.78506e-14	3.1512e-10	1.0,1.0,1.0	0.497,0.0,0.0	0.834		unknown protein; FUNCTIONS IN: molecular_function unknown; INVOLVED IN: biological_process unknown; LOCATED IN: chloroplast; Has 37 Blast hits to 37 proteins in 17 species: Archae - 0; Bacteria - 0; Metazoa - 0; Fungi - 0; Plants - 30; Viruses - 0; /.../Eukaryotes - 7 (source: NCBI BLink). [Source:TAIR;Acc:AT4G01935]
A3SS	AT4G15545	4	+	8876927	8877117	8876970	8877117	8876768	8876867	2.65121e-13	1.16397e-09	1.0,1.0,0.868	0.85,0.849,0.874	0.098		Uncharacterized protein At4g15545 [Source:UniProtKB/Swiss-Prot;Acc:Q93W28]
A3SS	AT3G07270	3	+	2315076	2315664	2315463	2315664	2313997	2314017	4.20886e-13	1.58385e-09	0.885,0.858,0.849	1.0,0.988,1.0	-0.132	GCH1	GTP cyclohydrolase 1 [Source:UniProtKB/Swiss-Prot;Acc:Q9SFV7]
A3SS	AT1G79280	1	-	29827914	29828016	29827914	29827958	29828408	29828487	2.79421e-12	9.20063e-09	0.266,0.194,0.094	0.853,1.0,1.0	-0.766	NUA	Nuclear-pore anchor [Source:UniProtKB/Swiss-Prot;Acc:A4GSN8]
A3SS	AT1G56280	1	-	21073305	21073493	21073305	21073473	21073560	21073793	1.37815e-11	4.0337e-08	1.0,1.0,1.0	0.582,0.816,0.65	0.317	ATDI19	drought-induced 19 [Source:TAIR;Acc:AT1G56280]
A3SS	AT1G20020	1	+	6943258	6943483	6943264	6943483	6942716	6942955	8.30499e-11	1.98882e-07	1.0,1.0,1.0	0.814,1.0,0.764	0.141	LFNR2	Ferredoxin--NADP reductase, leaf isozyme 2, chloroplastic [Source:UniProtKB/Swiss-Prot;Acc:Q8W493]
A3SS	AT5G64740	5	+	25884973	25885158	25884978	25885158	25884599	25884876	1.53064e-10	2.93964e-07	0.25,0.547,0.647	1.0,0.792,1.0	-0.449	CESA6	Cellulose synthase A catalytic subunit 6 [UDP-forming] [Source:UniProtKB/Swiss-Prot;Acc:Q94JQ6]
A3SS	AT5G56850	5	-	22987289	22987424	22987289	22987414	22987498	22987572	2.60451e-10	4.57387e-07	1.0,1.0,1.0	0.485,0.239,0.557	0.573		unknown protein; EXPRESSED IN: 21 plant structures; EXPRESSED DURING: 13 growth stages; Has 35333 Blast hits to 34131 proteins in 2444 species: Archae - 798; Bacteria - 22429; Metazoa - 974; Fungi - 991; Plants - 531; Viruses - 0; Other Eukaryotes - /.../(source: NCBI BLink). [Source:TAIR;Acc:AT5G56850]
A3SS	AT5G16030	5	+	5239084	5239293	5239116	5239293	5238679	5238997	2.87185e-10	4.72815e-07	0.865,0.949,0.72	1.0,1.0,1.0	-0.155		unknown protein; BEST Arabidopsis thaliana protein match is: unknown protein (TAIR:AT3G02500.1); Has 30201 Blast hits to 17322 proteins in 780 species: Archae - 12; Bacteria - 1396; Metazoa - 17338; Fungi - 3422; Plants - 5037; Viruses - 0; Other Eu /.../es - 2996 (source: NCBI BLink). [Source:TAIR;Acc:AT5G16030]
A3SS	AT3G60370	3	-	22315810	22315925	22315810	22315920	22316033	22316218	3.76905e-10	5.84026e-07	0.109,0.066,0.11	0.293,0.305,0.285	-0.199	FKBP20-2	Peptidyl-prolyl cis-trans isomerase FKBP20-2, chloroplastic [Source:UniProtKB/Swiss-Prot;Acc:Q0WRJ7]
A3SS	AT3G09090	3	-	2786403	2786567	2786403	2786559	2786663	2786781	1.03787e-09	1.43893e-06	1.0,1.0,1.0	0.892,0.811,1.0	0.099	DEX1	Protein DEFECTIVE IN EXINE FORMATION 1 [Source:UniProtKB/Swiss-Prot;Acc:F4IYM4]
A3SS	AT1G07440	1	-	2287299	2287496	2287299	2287481	2287585	2287730	4.41014e-09	5.80859e-06	1.0,1.0,1.0	0.774,0.578,0.598	0.35		Tropinone reductase homolog At1g07440 [Source:UniProtKB/Swiss-Prot;Acc:P0DKI3]
A3SS	AT5G66570	5	+	26569286	26569486	26569297	26569486	26568652	26568986	6.77311e-09	8.49606e-06	1.0,0.823,1.0	1.0,1.0,1.0	-0.059	PSBO1	Oxygen-evolving enhancer protein 1-1, chloroplastic [Source:UniProtKB/Swiss-Prot;Acc:P23321]
A3SS	AT1G07440	1	-	2287299	2287493	2287299	2287481	2287585	2287730	1.15086e-08	1.378e-05	1.0,1.0,1.0	0.788,0.554,0.583	0.358		Tropinone reductase homolog At1g07440 [Source:UniProtKB/Swiss-Prot;Acc:P0DKI3]
A3SS	AT1G07600	1	-	2338903	2338990	2338903	2338978	2339265	2339321	1.60163e-08	1.75793e-05	1.0,1.0,1.0	1.0,1.0,0.827	0.058	MT1A	Metallothionein-like protein 1A [Source:UniProtKB/Swiss-Prot;Acc:P43392]
A3SS	AT1G23110	1	-	8197498	8197752	8197498	8197747	8198070	8198331	1.83222e-08	1.85632e-05	1.0,1.0,1.0	0.0,0.532,0.661	0.602		unknown protein; FUNCTIONS IN: molecular_function unknown; LOCATED IN: chloroplast; BEST Arabidopsis thaliana protein match is: unknown protein (TAIR:AT1G70900.1); Has 59 Blast hits to 59 proteins in 15 species: Archae - 0; Bacteria - 0; Metazoa - 0 /.../i - 0; Plants - 59; Viruses - 0; Other Eukaryotes - 0 (source: NCBI BLink). [Source:TAIR;Acc:AT1G23110]
A3SS	AT1G07440	1	-	2287299	2287527	2287299	2287481	2287585	2287730	1.8214e-08	1.85632e-05	1.0,1.0,1.0	0.856,0.776,0.749	0.206		Tropinone reductase homolog At1g07440 [Source:UniProtKB/Swiss-Prot;Acc:P0DKI3]
A3SS	AT1G07600	1	-	2338903	2338997	2338903	2338978	2339265	2339321	2.0439e-08	1.99409e-05	1.0,1.0,1.0	1.0,1.0,0.823	0.059	MT1A	Metallothionein-like protein 1A [Source:UniProtKB/Swiss-Prot;Acc:P43392]
A3SS	AT1G69523	1	+	26130330	26130549	26130337	26130549	26130151	26130247	2.41658e-08	2.27348e-05	0.413,0.841,0.692	0.961,1.0,1.0	-0.338		S-adenosyl-L-methionine-dependent methyltransferases superfamily protein [Source:TAIR;Acc:AT1G69523]
A3SS	AT2G27460	2	+	11742843	11742960	11742863	11742960	11742670	11742752	2.74796e-08	2.4961e-05	1.0,1.0,1.0	0.151,0.399,0.8	0.55		sec23/sec24 transport family protein [Source:TAIR;Acc:AT2G27460]
A3SS	AT3G19180	3	+	6634998	6635172	6635050	6635172	6634815	6634911	3.58187e-08	3.14512e-05	1.0,1.0,1.0	0.554,0.651,0.598	0.399	CDP1	Plastid division protein CDP1, chloroplastic [Source:UniProtKB/Swiss-Prot;Acc:Q8VY16]
A3SS	AT1G63490	1	-	23546637	23546789	23546637	23546756	23546890	23547022	3.76876e-08	3.20247e-05	1.0,1.0,1.0	0.523,0.531,0.832	0.371		transcription factor jumonji (jmjC) domain-containing protein [Source:TAIR;Acc:AT1G63490]
A3SS	AT5G04110	5	-	1113830	1113938	1113830	1113929	1114061	1114142	6.77587e-08	5.4853e-05	1.0,1.0,1.0	0.891,0.897,0.842	0.123	GYRB3	DNA GYRASE B3 [Source:TAIR;Acc:AT5G04110]
A3SS	AT3G48750	3	+	18072329	18072504	18072337	18072504	18072231	18072246	7.78181e-08	6.02907e-05	1.0,1.0,1.0	0.589,0.884,0.619	0.303	CDKA-1	Cyclin-dependent kinase A-1 [Source:UniProtKB/Swiss-Prot;Acc:P24100]
A3SS	AT5G66570	5	+	26569286	26569486	26569290	26569486	26568652	26568986	9.73448e-08	7.32645e-05	0.991,1.0,1.0	0.798,1.0,1.0	0.064	PSBO1	Oxygen-evolving enhancer protein 1-1, chloroplastic [Source:UniProtKB/Swiss-Prot;Acc:P23321]
A3SS	AT1G21400	1	+	7495336	7495477	7495369	7495477	7495166	7495266	1.30717e-07	9.30637e-05	1.0,1.0,0.961	0.767,0.687,0.738	0.256	F24J8.4	2-oxoisovalerate dehydrogenase subunit alpha 1, mitochondrial [Source:UniProtKB/Swiss-Prot;Acc:Q9LPL5]
A3SS	AT1G27450	1	+	9532352	9532502	9532400	9532502	9531838	9532201	1.45954e-07	9.59778e-05	0.426,0.39,0.398	0.565,0.517,0.629	-0.166	APT1	Adenine phosphoribosyltransferase 1, chloroplastic [Source:UniProtKB/Swiss-Prot;Acc:P31166]
A3SS	AT1G27450	1	+	9532334	9532502	9532400	9532502	9531838	9532201	1.49385e-07	9.59778e-05	0.403,0.378,0.38	0.537,0.503,0.611	-0.163	APT1	Adenine phosphoribosyltransferase 1, chloroplastic [Source:UniProtKB/Swiss-Prot;Acc:P31166]
A3SS	AT4G22230	4	+	11762457	11762688	11762460	11762688	11762291	11762367	1.48667e-07	9.59778e-05	0.831,0.552,0.441	1.0,1.0,1.0	-0.392		Defensin-like protein 96 [Source:UniProtKB/Swiss-Prot;Acc:Q8L7G7]
A3SS	AT1G60890	1	-	22414729	22414904	22414729	22414897	22415168	22416227	1.38827e-07	9.59778e-05	0.077,0.22,0.101	0.0,0.0,0.0	0.133	PIP5K8	Phosphatidylinositol 4-phosphate 5-kinase 8 [Source:UniProtKB/Swiss-Prot;Acc:Q8RY89]
A3SS	AT3G17510	3	-	5990183	5990423	5990183	5990389	5990481	5990661	2.41704e-07	0.000151595	1.0,1.0,1.0	0.631,1.0,0.817	0.184	CIPK1	CBL-interacting serine/threonine-protein kinase 1 [Source:UniProtKB/Swiss-Prot;Acc:Q8RWC9]
A3SS	AT1G32400	1	-	11689584	11689762	11689584	11689757	11689948	11690053	2.89363e-07	0.000177265	1.0,1.0,1.0	0.56,0.623,1.0	0.272	TOM2A	Tobamovirus multiplication protein 2A [Source:UniProtKB/Swiss-Prot;Acc:Q9C5W7]
A3SS	AT5G61900	5	-	24858997	24859272	24858997	24859194	24859298	24859341	3.1939e-07	0.000191213	0.204,0.139,0.104	0.676,0.645,0.397	-0.424	BON1	Protein BONZAI 1 [Source:UniProtKB/Swiss-Prot;Acc:Q941L3]
A3SS	AT5G64460	5	-	25775190	25775429	25775190	25775354	25775477	25775568	3.84058e-07	0.000224819	0.786,0.88,0.936	0.342,0.373,0.501	0.462		Phosphoglycerate mutase-like protein 1 [Source:UniProtKB/Swiss-Prot;Acc:Q9FGF0]
A3SS	AT1G17290	1	+	5923981	5924229	5924027	5924229	5923859	5923925	4.26856e-07	0.00024444	0.981,0.949,0.972	0.874,0.818,0.876	0.111	ALAAT1	Alanine aminotransferase 1, mitochondrial [Source:UniProtKB/Swiss-Prot;Acc:F4I7I0]
A3SS	AT2G02770	2	-	777174	777318	777174	777313	777400	777478	4.9673e-07	0.000278401	1.0,0.963,0.892	0.825,0.574,0.623	0.278		4'-phosphopantetheinyl transferase superfamily [Source:TAIR;Acc:AT2G02770]
A3SS	AT3G23540	3	+	8446595	8446650	8446600	8446650	8446355	8446511	5.87179e-07	0.000322239	0.926,0.933,0.955	0.989,0.992,1.0	-0.056		alpha/beta-Hydrolases superfamily protein [Source:TAIR;Acc:AT3G23540]
A3SS	AT5G53580	5	-	21766214	21766308	21766214	21766299	21766489	21766542	6.1881e-07	0.000332667	0.936,0.966,0.962	0.849,0.834,0.936	0.082	PLR1	Pyridoxal reductase, chloroplastic [Source:UniProtKB/Swiss-Prot;Acc:Q56Y42]
A3SS	AT1G69750	1	+	26236260	26236361	26236287	26236361	26235776	26235855	6.6796e-07	0.000351908	1.0,1.0,1.0	0.577,0.593,1.0	0.277	COX19-2	cytochrome c oxidase 19-2 [Source:TAIR;Acc:AT1G69750]
A3SS	AT4G32560	4	+	15715760	15715888	15715765	15715888	15715576	15715657	6.83842e-07	0.000353211	0.0,0.0,0.0	0.098,0.252,0.053	-0.134		paramyosin-related [Source:TAIR;Acc:AT4G32560]
A3SS	AT1G70620	1	+	26627774	26628053	26627808	26628053	26627195	26627540	7.80944e-07	0.000395608	0.692,0.686,0.804	1.0,1.0,1.0	-0.273		cyclin-related [Source:TAIR;Acc:AT1G70620]
A3SS	AT5G12200	5	-	3941997	3942162	3941997	3942148	3942264	3942317	8.7764e-07	0.000436204	1.0,0.928,1.0	0.697,0.866,0.525	0.28	PYD2	Dihydropyrimidinase [Source:UniProtKB/Swiss-Prot;Acc:Q9FMP3]
A3SS	AT1G63490	1	-	23546637	23546797	23546637	23546756	23546890	23547022	1.11533e-06	0.000534183	1.0,1.0,1.0	0.866,0.825,0.958	0.117		transcription factor jumonji (jmjC) domain-containing protein [Source:TAIR;Acc:AT1G63490]
A3SS	AT1G06680	1	+	2048606	2048670	2048619	2048670	2048296	2048528	1.38595e-06	0.00065194	0.735,0.671,0.649	1.0,1.0,1.0	-0.315	PSBP1	Oxygen-evolving enhancer protein 2-1, chloroplastic [Source:UniProtKB/Swiss-Prot;Acc:Q42029]
A3SS	AT3G29390	3	+	11292107	11292221	11292112	11292221	11291928	11291988	1.46227e-06	0.000675774	1.0,0.83,1.0	0.0,0.394,0.438	0.666	RIK	Protein RIK [Source:UniProtKB/Swiss-Prot;Acc:Q9LIA4]
A3SS	AT1G69750	1	+	26236253	26236361	26236287	26236361	26235776	26235855	1.86362e-06	0.000832059	1.0,1.0,1.0	0.816,0.72,1.0	0.155	COX19-2	cytochrome c oxidase 19-2 [Source:TAIR;Acc:AT1G69750]
A3SS	AT1G33700	1	-	12213538	12213590	12213538	12213584	12214108	12214182	2.00026e-06	0.000855072	0.943,1.0,1.0	0.831,0.904,0.727	0.16		Beta-glucosidase, GBA2 type family protein [Source:TAIR;Acc:AT1G33700]
A3SS	AT5G22620	5	-	7518145	7518269	7518145	7518253	7518372	7518471	1.95154e-06	0.000855072	0.0,0.014,0.022	0.067,0.071,0.066	-0.056		Probable 2-carboxy-D-arabinitol-1-phosphatase [Source:UniProtKB/Swiss-Prot;Acc:Q9FNJ9]
A3SS	AT1G58602	1	+	21763880	21764050	21764032	21764050	21761384	21763787	2.01254e-06	0.000855072	0.806,0.667,0.724	1.0,1.0,1.0	-0.268		Probable disease resistance protein At1g58602 [Source:UniProtKB/Swiss-Prot;Acc:Q8W3K0]
A3SS	AT3G06500	3	+	2013313	2013554	2013383	2013554	2012078	2013058	2.11547e-06	0.000884535	1.0,0.956,1.0	0.578,1.0,0.631	0.249	INVC	Alkaline/neutral invertase C, mitochondrial [Source:UniProtKB/Swiss-Prot;Acc:B9DFA8]
A3SS	AT4G39420	4	+	18351394	18351511	18351398	18351511	18350558	18351023	2.40247e-06	0.00097363	1.0,0.975,1.0	0.885,0.729,0.972	0.13		unknown protein; Has 46 Blast hits to 40 proteins in 10 species: Archae - 0; Bacteria - 0; Metazoa - 0; Fungi - 0; Plants - 44; Viruses - 0; Other Eukaryotes - 2 (source: NCBI BLink). [Source:TAIR;Acc:AT4G39420]
A3SS	AT4G13350	4	-	7773222	7773358	7773222	7773349	7773573	7773815	2.36712e-06	0.00097363	0.193,0.318,0.3	0.166,0.112,0.138	0.132	NIG	NSP (nuclear shuttle protein)-interacting GTPase [Source:TAIR;Acc:AT4G13350]
A3SS	AT5G28840	5	-	10863873	10864044	10863873	10864002	10864725	10864903	2.5908e-06	0.00102104	1.0,1.0,1.0	1.0,0.784,1.0	0.072	GME	GDP-mannose 3,5-epimerase [Source:UniProtKB/Swiss-Prot;Acc:Q93VR3]
A3SS	AT2G16900	2	-	7325250	7325659	7325250	7325411	7325885	7326221	2.67093e-06	0.00103467	0.023,0.01,0.052	0.168,0.057,0.1	-0.08		Arabidopsis phospholipase-like protein (PEARLI 4) family [Source:TAIR;Acc:AT2G16900]
A3SS	AT3G48190	3	+	17811716	17811858	17811783	17811858	17811559	17811623	2.99986e-06	0.00114525	0.201,0.159,0.14	0.0,0.0,0.0	0.167	ATM	ataxia-telangiectasia mutated [Source:TAIR;Acc:AT3G48190]
A3SS	AT2G41340	2	+	17230298	17230482	17230316	17230482	17230107	17230221	3.06576e-06	0.00115369	0.0,0.252,0.545	0.0,0.0,0.0	0.266	NRPD5B	DNA-directed RNA polymerases IV and V subunit 5B [Source:UniProtKB/Swiss-Prot;Acc:Q9ZVB9]
A3SS	AT3G12150	3	-	3877928	3878142	3877928	3878007	3878233	3878900	3.23069e-06	0.00116579	1.0,1.0,0.345	0.397,0.19,0.24	0.506		unknown protein; CONTAINS InterPro DOMAIN/s: Protein of unknown function DUF2048 (InterPro:IPR019149); Has 421 Blast hits to 334 proteins in 155 species: Archae - 2; Bacteria - 147; Metazoa - 215; Fungi - 0; Plants - 43; Viruses - 0; Other Eukaryote /.../ (source: NCBI BLink). [Source:TAIR;Acc:AT3G12150]
A3SS	AT2G30170	2	-	12880226	12880353	12880226	12880345	12880427	12880525	3.20933e-06	0.00116579	1.0,1.0,1.0	1.0,0.0,0.193	0.602		Probable protein phosphatase 2C 26 [Source:UniProtKB/Swiss-Prot;Acc:O64730]
A3SS	AT2G46430	2	+	19058293	19058498	19058439	19058498	19058129	19058259	3.20849e-06	0.00116579	0.095,0.073,0.11	0.0,0.0,0.0	0.093	CNGC3	Probable cyclic nucleotide-gated ion channel 3 [Source:UniProtKB/Swiss-Prot;Acc:Q9SKD7]
A3SS	AT1G19485	1	+	6749975	6750049	6749990	6750049	6749825	6749898	3.42756e-06	0.00118582	1.0,1.0,1.0	0.91,0.804,0.416	0.29		Transducin/WD40 repeat-like superfamily protein [Source:TAIR;Acc:AT1G19485]
A3SS	AT1G09932	1	-	3231562	3231811	3231562	3231632	3232016	3232137	3.35906e-06	0.00118582	0.863,0.849,0.86	1.0,1.0,1.0	-0.143		Phosphoglycerate mutase family protein [Source:TAIR;Acc:AT1G09932]
A3SS	AT2G39435	2	-	16466645	16466745	16466645	16466691	16466815	16466941	3.40542e-06	0.00118582	0.05,0.076,0.0	0.563,0.356,0.181	-0.325		Phosphatidylinositol N-acetyglucosaminlytransferase subunit P-related [Source:TAIR;Acc:AT2G39435]
A3SS	AT3G24840	3	+	9068563	9068669	9068567	9068669	9068401	9068479	3.46627e-06	0.00118582	0.0,0.095,0.0	0.225,0.232,0.14	-0.167	SFH9	Phosphatidylinositol/phosphatidylcholine transfer protein SFH9 [Source:UniProtKB/Swiss-Prot;Acc:F4J7S8]
A3SS	AT5G54940	5	-	22309215	22309280	22309215	22309264	22309356	22309410	3.69479e-06	0.0012478	1.0,1.0,0.833	0.8,0.679,0.657	0.232		Translation initiation factor SUI1 family protein [Source:TAIR;Acc:AT5G54940]
A3SS	AT1G27450	1	+	9532352	9532502	9532397	9532502	9531838	9532201	4.42219e-06	0.00145612	0.924,0.906,0.959	0.975,0.994,0.977	-0.052	APT1	Adenine phosphoribosyltransferase 1, chloroplastic [Source:UniProtKB/Swiss-Prot;Acc:P31166]
A3SS	AT3G45780	3	+	16821832	16821892	16821833	16821892	16821644	16821751	4.59696e-06	0.00149498	0.125,0.053,0.143	0.458,0.421,0.417	-0.325	PHOT1	Phototropin-1 [Source:UniProtKB/Swiss-Prot;Acc:O48963]
A3SS	AT2G18960	2	+	8225482	8225695	8225488	8225695	8225199	8225364	4.67769e-06	0.00150268	1.0,1.0,1.0	0.669,1.0,0.98	0.117	AHA1	ATPase 1, plasma membrane-type [Source:UniProtKB/Swiss-Prot;Acc:P20649]
A3SS	AT5G51620	5	+	20967482	20967588	20967507	20967588	20967045	20967174	5.10016e-06	0.00159938	0.301,0.177,0.463	0.463,1.0,1.0	-0.507		Uncharacterised protein family (UPF0172) [Source:TAIR;Acc:AT5G51620]
A3SS	AT1G27450	1	+	9532334	9532502	9532397	9532502	9531838	9532201	5.36755e-06	0.00164409	0.917,0.902,0.956	0.972,0.993,0.975	-0.055	APT1	Adenine phosphoribosyltransferase 1, chloroplastic [Source:UniProtKB/Swiss-Prot;Acc:P31166]
A3SS	AT5G38000	5	+	15142520	15142649	15142539	15142649	15142130	15142311	5.31155e-06	0.00164409	1.0,0.926,1.0	0.563,0.899,0.641	0.274		Zinc-binding dehydrogenase family protein [Source:TAIR;Acc:AT5G38000]
A3SS	AT3G48110	3	+	17765146	17765278	17765151	17765278	17764897	17764999	5.6202e-06	0.00170169	0.017,0.044,0.031	0.136,0.131,0.09	-0.088	GLYRS-2	Glycine--tRNA ligase 2, chloroplastic/mitochondrial [Source:UniProtKB/Swiss-Prot;Acc:Q8L785]
A3SS	AT5G60940	5	+	24524147	24524225	24524157	24524225	24524026	24524049	6.37169e-06	0.00190731	1.0,0.986,1.0	0.867,0.889,0.986	0.081	CSTF50	Cleavage stimulation factor subunit 50 [Source:UniProtKB/Swiss-Prot;Acc:Q8L4J2]
A3SS	AT4G28706	4	+	14169326	14169442	14169331	14169442	14168910	14169061	6.64234e-06	0.00194414	0.025,0.075,0.109	0.173,0.224,0.143	-0.11		pfkB-like carbohydrate kinase family protein [Source:TAIR;Acc:AT4G28706]
A3SS	AT3G48820	3	-	18102592	18102659	18102592	18102632	18102764	18102911	6.57936e-06	0.00194414	0.797,0.814,0.816	1.0,0.899,0.949	-0.14		Glycosyltransferase family 29 (sialyltransferase) family protein [Source:TAIR;Acc:AT3G48820]
A3SS	AT1G71340	1	-	26886705	26886770	26886705	26886766	26886870	26886954	7.19958e-06	0.00207925	0.878,0.537,0.737	0.915,1.0,0.971	-0.245	GDPD4	Glycerophosphodiester phosphodiesterase GDPD4 [Source:UniProtKB/Swiss-Prot;Acc:F4I8H8]
A3SS	AT1G78070	1	+	29356299	29356466	29356380	29356466	29355738	29355825	7.26184e-06	0.00207925	1.0,1.0,1.0	0.303,1.0,0.689	0.336		Transducin/WD40 repeat-like superfamily protein [Source:TAIR;Acc:AT1G78070]
A3SS	AT2G20815	2	+	8961641	8961755	8961647	8961755	8961473	8961563	7.68702e-06	0.00217733	0.0,0.0,0.0	0.617,0.195,0.492	-0.435	QWRF3	QWRF motif-containing protein 3 [Source:UniProtKB/Swiss-Prot;Acc:Q8S8I1]
A3SS	AT5G38030	5	-	15172437	15172631	15172437	15172494	15173850	15173937	8.304e-06	0.00232706	0.012,0.016,0.048	0.101,0.133,0.059	-0.072		MATE efflux family protein [Source:TAIR;Acc:AT5G38030]
A3SS	AT5G35400	5	-	13601342	13601488	13601342	13601483	13601608	13601793	8.66187e-06	0.0024018	0.796,0.773,0.911	0.961,1.0,1.0	-0.16		Pseudouridine synthase family protein [Source:TAIR;Acc:AT5G35400]
A3SS	AT3G01470	3	-	183627	183855	183627	183789	183946	184403	8.95635e-06	0.00244204	0.481,0.41,0.188	0.777,1.0,0.676	-0.458	HAT5	Homeobox-leucine zipper protein HAT5 [Source:UniProtKB/Swiss-Prot;Acc:Q02283]
A3SS	AT5G54570	5	-	22169544	22169719	22169544	22169620	22169791	22169850	8.99238e-06	0.00244204	1.0,1.0,0.547	0.458,0.194,0.446	0.483	BGLU41	Putative beta-glucosidase 41 [Source:UniProtKB/Swiss-Prot;Acc:Q9FIU7]
A3SS	AT1G63010	1	-	23351909	23352092	23351909	23351989	23352323	23352697	9.16749e-06	0.00246418	0.111,0.147,0.162	0.063,0.076,0.04	0.08		SPX domain-containing membrane protein At1g63010 [Source:UniProtKB/Swiss-Prot;Acc:Q2V4F9]
A3SS	AT5G07440	5	+	2356634	2356883	2356644	2356883	2356361	2356475	1.00827e-05	0.00268283	1.0,0.824,1.0	1.0,1.0,1.0	-0.059	GDH2	Glutamate dehydrogenase 2 [Source:UniProtKB/Swiss-Prot;Acc:Q38946]
A3SS	AT1G73180	1	+	27519307	27519537	27519312	27519537	27518916	27519103	1.05123e-05	0.00276914	0.907,0.745,1.0	0.722,0.196,0.594	0.38		Eukaryotic translation initiation factor eIF2A family protein [Source:TAIR;Acc:AT1G73180]
A3SS	AT1G23490	1	+	8337227	8337379	8337230	8337379	8336682	8336805	1.08392e-05	0.00282698	1.0,0.84,1.0	0.783,0.248,0.463	0.449	ARF2-A	ADP-ribosylation factor 2-B [Source:UniProtKB/Swiss-Prot;Acc:P0DH91]
A3SS	AT3G25740	3	+	9399046	9399126	9399053	9399126	9398903	9398975	1.11688e-05	0.0028844	1.0,1.0,0.965	0.828,1.0,0.818	0.106	MAP1C	Methionine aminopeptidase 1C, chloroplastic/mitochondrial [Source:UniProtKB/Swiss-Prot;Acc:Q9FV51]
A3SS	AT5G57030	5	+	23078276	23078385	23078288	23078385	23078032	23078168	1.19176e-05	0.0030479	1.0,1.0,1.0	0.951,0.736,0.717	0.199	LUT2	Lycopene epsilon cyclase, chloroplastic [Source:UniProtKB/Swiss-Prot;Acc:Q38932]
A3SS	AT5G01720	5	-	269136	269262	269136	269245	269350	269476	1.26537e-05	0.00317327	1.0,1.0,1.0	0.558,1.0,0.265	0.392	FBL3	F-box/LRR-repeat protein 3 [Source:UniProtKB/Swiss-Prot;Acc:Q8RWU5]
A3SS	AT4G22540	4	-	11863166	11863282	11863166	11863208	11863760	11864126	1.26999e-05	0.00317327	1.0,1.0,1.0	0.843,0.942,0.655	0.187	ORP2A	Oxysterol-binding protein-related protein 2A [Source:UniProtKB/Swiss-Prot;Acc:Q940Y1]
A3SS	AT5G54570	5	-	22169544	22169735	22169544	22169620	22169791	22169850	1.28863e-05	0.00317327	1.0,1.0,0.531	0.531,0.185,0.362	0.484	BGLU41	Putative beta-glucosidase 41 [Source:UniProtKB/Swiss-Prot;Acc:Q9FIU7]
A3SS	AT1G53380	1	-	19915841	19915959	19915841	19915952	19916380	19916517	1.28897e-05	0.00317327	0.966,0.967,1.0	0.885,0.914,0.812	0.107		Plant protein of unknown function (DUF641) [Source:TAIR;Acc:AT1G53380]
A3SS	AT5G26610	5	+	9375405	9375527	9375437	9375527	9375182	9375283	1.37857e-05	0.00336243	1.0,0.882,1.0	0.768,0.453,0.525	0.379		D111/G-patch domain-containing protein [Source:TAIR;Acc:AT5G26610]
A3SS	AT3G19180	3	+	6635050	6635172	6635055	6635172	6634815	6634911	1.4281e-05	0.00345128	0.0,0.0,0.0	0.189,0.036,0.175	-0.133	CDP1	Plastid division protein CDP1, chloroplastic [Source:UniProtKB/Swiss-Prot;Acc:Q8VY16]
A3SS	AT5G18525	5	-	6150339	6150555	6150339	6150548	6150671	6150999	1.50717e-05	0.00360926	0.942,0.774,0.862	0.391,0.673,0.477	0.346		protein serine/threonine kinases;protein tyrosine kinases;ATP binding;protein kinases [Source:TAIR;Acc:AT5G18525]
A3SS	AT5G66190	5	-	26452571	26452798	26452571	26452793	26452907	26453199	1.63349e-05	0.00378438	0.698,1.0,1.0	1.0,1.0,1.0	-0.101	LFNR1	Ferredoxin--NADP reductase, leaf isozyme 1, chloroplastic [Source:UniProtKB/Swiss-Prot;Acc:Q9FKW6]
A3SS	AT1G63830	1	+	23685396	23685510	23685405	23685510	23685092	23685299	1.60781e-05	0.00378438	0.06,0.069,0.089	0.015,0.0,0.021	0.061		PLAC8 family protein [Source:TAIR;Acc:AT1G63830]
A3SS	AT1G30420	1	+	10750576	10750717	10750650	10750717	10750241	10750464	1.65477e-05	0.00378438	0.309,0.801,0.0	1.0,1.0,0.729	-0.54	ABCC11	ABC transporter C family member 11 [Source:UniProtKB/Swiss-Prot;Acc:Q9C8H1]
A3SS	AT1G58350	1	-	21664824	21665031	21664824	21665005	21665127	21665261	1.65978e-05	0.00378438	0.132,0.112,0.054	0.041,0.0,0.0	0.086	ZW18	Putative serine esterase family protein [Source:TAIR;Acc:AT1G58350]
A3SS	AT1G19600	1	+	6780203	6780314	6780224	6780314	6780013	6780121	1.61206e-05	0.00378438	1.0,1.0,1.0	0.795,0.793,1.0	0.137		pfkB-like carbohydrate kinase family protein [Source:TAIR;Acc:AT1G19600]
A3SS	AT5G35400	5	-	13601355	13601507	13601355	13601483	13601608	13601793	1.75325e-05	0.00388103	0.0,0.0,0.0	0.0,1.0,1.0	-0.667		Pseudouridine synthase family protein [Source:TAIR;Acc:AT5G35400]
A3SS	AT4G25940	4	-	13171437	13171562	13171437	13171554	13171629	13171743	1.75067e-05	0.00388103	0.235,0.187,0.0	0.0,0.0,0.0	0.141		Putative clathrin assembly protein At4g25940 [Source:UniProtKB/Swiss-Prot;Acc:Q8VYT2]
A3SS	AT1G23490	1	+	8337222	8337379	8337230	8337379	8336682	8336805	1.86401e-05	0.00409181	1.0,0.972,1.0	0.97,0.918,0.923	0.054	ARF2-A	ADP-ribosylation factor 2-B [Source:UniProtKB/Swiss-Prot;Acc:P0DH91]
A3SS	AT4G22540	4	-	11863166	11863232	11863166	11863208	11863760	11864126	1.95106e-05	0.0042475	1.0,1.0,1.0	0.839,0.952,0.733	0.159	ORP2A	Oxysterol-binding protein-related protein 2A [Source:UniProtKB/Swiss-Prot;Acc:Q940Y1]
A3SS	AT4G33500	4	-	16114222	16114343	16114222	16114289	16114468	16114638	2.0349e-05	0.00432284	0.019,0.017,0.042	0.105,0.058,0.123	-0.069		Probable protein phosphatase 2C 62 [Source:UniProtKB/Swiss-Prot;Acc:Q93V88]
A3SS	AT2G32640	2	-	13849668	13849733	13849668	13849728	13849812	13849920	2.02572e-05	0.00432284	1.0,0.967,1.0	0.841,0.919,1.0	0.069		Lycopene beta/epsilon cyclase protein [Source:TAIR;Acc:AT2G32640]
A3SS	AT4G33500	4	-	16113922	16114010	16113922	16114000	16114222	16114363	2.19115e-05	0.0043398	0.98,0.963,0.97	0.873,0.935,0.88	0.075		Probable protein phosphatase 2C 62 [Source:UniProtKB/Swiss-Prot;Acc:Q93V88]
A3SS	AT1G33700	1	-	12213538	12213600	12213538	12213584	12214108	12214182	2.12508e-05	0.0043398	0.645,1.0,1.0	0.56,0.773,0.476	0.279		Beta-glucosidase, GBA2 type family protein [Source:TAIR;Acc:AT1G33700]
A3SS	AT5G41370	5	+	16552512	16552572	16552548	16552572	16552306	16552363	2.09716e-05	0.0043398	1.0,1.0,1.0	0.734,0.69,1.0	0.192	XPB1	DNA repair helicase XPB1 [Source:UniProtKB/Swiss-Prot;Acc:Q38861]
A3SS	AT3G09410	3	-	2899686	2899811	2899686	2899798	2900009	2900099	2.1417e-05	0.0043398	1.0,0.989,1.0	0.951,0.922,0.908	0.069	PAE5	Pectin acetylesterase 5 [Source:UniProtKB/Swiss-Prot;Acc:Q9SR22]
A3SS	AT1G78670	1	+	29591535	29591728	29591675	29591728	29590944	29591409	2.10492e-05	0.0043398	0.847,0.836,1.0	1.0,1.0,1.0	-0.106	GGH3	Probable gamma-glutamyl hydrolase 3 [Source:UniProtKB/Swiss-Prot;Acc:Q9ZV85]
A3SS	AT3G62310	3	-	23058276	23058506	23058276	23058488	23058773	23059858	2.16041e-05	0.0043398	0.729,1.0,1.0	0.391,0.391,0.642	0.435		RNA helicase family protein [Source:TAIR;Acc:AT3G62310]
A3SS	AT3G43220	3	-	15200100	15200232	15200100	15200152	15200338	15200472	2.1726e-05	0.0043398	0.983,0.926,0.766	0.972,1.0,0.98	-0.092	SAC3	Phosphoinositide phosphatase SAC3 [Source:UniProtKB/Swiss-Prot;Acc:Q7XZU2]
A3SS	AT4G38220	4	+	17926508	17926742	17926526	17926742	17926233	17926371	2.17528e-05	0.0043398	0.908,0.672,0.957	1.0,1.0,1.0	-0.154		Peptidase M20/M25/M40 family protein [Source:TAIR;Acc:AT4G38220]
A3SS	AT4G26555	4	-	13405229	13405321	13405229	13405311	13405430	13405465	2.30521e-05	0.00449807	0.702,0.715,0.688	1.0,0.938,1.0	-0.278	FKBP16-1	Peptidyl-prolyl cis-trans isomerase FKBP16-1, chloroplastic [Source:UniProtKB/Swiss-Prot;Acc:Q944B0]
A3SS	AT1G05030	1	-	1439157	1439304	1439157	1439269	1439490	1439658	2.29427e-05	0.00449807	1.0,1.0,1.0	0.661,1.0,0.795	0.181		Probable plastidic glucose transporter 1 [Source:UniProtKB/Swiss-Prot;Acc:Q0WVE9]
A3SS	AT1G56280	1	-	21073305	21073493	21073305	21073471	21073560	21073793	2.39766e-05	0.00464406	1.0,1.0,1.0	1.0,0.677,1.0	0.108	ATDI19	drought-induced 19 [Source:TAIR;Acc:AT1G56280]
A3SS	AT1G04230	1	+	1127433	1127673	1127436	1127673	1127192	1127256	2.4461e-05	0.00470331	1.0,1.0,1.0	0.712,0.924,0.978	0.129		Protein of unknown function (DUF2361) [Source:TAIR;Acc:AT1G04230]
A3SS	AT1G60260	1	-	22219567	22219596	22219567	22219593	22219692	22219780	2.4875e-05	0.00471409	0.33,0.18,0.33	0.0,0.076,0.0	0.255	BGLU5	beta glucosidase 5 [Source:TAIR;Acc:AT1G60260]
A3SS	AT4G32280	4	+	15583922	15584251	15584048	15584251	15583386	15583738	2.46964e-05	0.00471409	0.953,1.0,0.958	0.849,0.926,0.876	0.087	IAA29	Auxin-responsive protein IAA29 [Source:UniProtKB/Swiss-Prot;Acc:Q93WC4]
A3SS	AT1G04300	1	-	1151953	1152053	1151953	1152048	1152316	1152475	2.57174e-05	0.00480692	1.0,1.0,0.661	0.422,0.661,0.422	0.385		TRAF-like superfamily protein [Source:TAIR;Acc:AT1G04300]
A3SS	AT1G31360	1	+	11233112	11233233	11233135	11233233	11232963	11232979	2.64534e-05	0.0049073	0.777,0.875,1.0	0.367,0.303,0.685	0.432	MED34	Mediator of RNA polymerase II transcription subunit 34 [Source:UniProtKB/Swiss-Prot;Acc:Q9FT73]
A3SS	AT5G56730	5	-	22951854	22952101	22951854	22952096	22952361	22952576	2.90928e-05	0.00535917	1.0,0.976,0.94	0.93,0.661,0.895	0.143		Insulinase (Peptidase family M16) protein [Source:TAIR;Acc:AT5G56730]
A3SS	AT1G63830	1	+	23685318	23685510	23685405	23685510	23685092	23685299	2.97352e-05	0.00542016	0.328,0.26,0.317	0.177,0.153,0.201	0.125		PLAC8 family protein [Source:TAIR;Acc:AT1G63830]
A3SS	AT4G02560	4	-	1126392	1126527	1126392	1126509	1126619	1126713	2.98728e-05	0.00542016	1.0,0.89,1.0	0.519,0.0,0.843	0.509	LD	Homeobox protein LUMINIDEPENDENS [Source:UniProtKB/Swiss-Prot;Acc:Q38796]
A3SS	AT3G23590	3	+	8470669	8470784	8470677	8470784	8470147	8470358	3.10584e-05	0.00556558	1.0,1.0,0.92	0.758,0.939,0.832	0.13	MED33A	Mediator of RNA polymerase II transcription subunit 33A [Source:UniProtKB/Swiss-Prot;Acc:Q9LUG9]
A3SS	AT3G07990	3	+	2553524	2553785	2553543	2553785	2553365	2553451	3.23176e-05	0.00575209	1.0,0.941,0.946	0.916,0.745,0.801	0.142	SCPL27	Serine carboxypeptidase-like 27 [Source:UniProtKB/Swiss-Prot;Acc:Q9SFB5]
A3SS	AT3G59780	3	+	22088407	22088532	22088417	22088532	22088217	22088318	3.29251e-05	0.0058209	0.166,0.215,0.115	0.277,0.246,0.239	-0.089		Rhodanese/Cell cycle control phosphatase superfamily protein [Source:TAIR;Acc:AT3G59780]
A3SS	AT2G14255	2	+	6037303	6037422	6037320	6037422	6036973	6037210	3.34549e-05	0.00587512	0.678,1.0,0.665	1.0,1.0,1.0	-0.219	PAT23	Probable protein S-acyltransferase 23 [Source:UniProtKB/Swiss-Prot;Acc:Q3EC11]
A3SS	AT1G23020	1	-	8153179	8153379	8153179	8153347	8153451	8153530	3.41072e-05	0.00595001	0.576,0.394,0.361	0.863,0.678,0.672	-0.294	FRO3	Ferric reduction oxidase 3, mitochondrial [Source:UniProtKB/Swiss-Prot;Acc:F4I4K7]
A3SS	AT3G46490	3	+	17116865	17117032	17116983	17117032	17116302	17116354	3.50552e-05	0.00603545	0.157,0.219,0.0	0.402,0.299,0.542	-0.289		2-oxoglutarate (2OG) and Fe(II)-dependent oxygenase superfamily protein [Source:TAIR;Acc:AT3G46490]
A3SS	AT3G06778	3	-	2140930	2141158	2140930	2140998	2141293	2141533	3.54913e-05	0.00607086	1.0,1.0,1.0	0.0,1.0,0.333	0.556		Chaperone DnaJ-domain superfamily protein [Source:TAIR;Acc:AT3G06778]
A3SS	AT3G23590	3	+	8470604	8470784	8470677	8470784	8470147	8470358	3.60718e-05	0.00613034	1.0,1.0,0.844	0.634,0.782,0.812	0.205	MED33A	Mediator of RNA polymerase II transcription subunit 33A [Source:UniProtKB/Swiss-Prot;Acc:Q9LUG9]
A3SS	AT4G33470	4	-	16104030	16104107	16104030	16104102	16104260	16104362	3.71769e-05	0.00627765	0.021,0.013,0.0	0.033,0.043,0.123	-0.055	HDA14	Histone deacetylase 14 [Source:UniProtKB/Swiss-Prot;Acc:Q941D6]
A3SS	AT5G16280	5	-	5328699	5328823	5328699	5328783	5329041	5329192	3.8952e-05	0.0065355	0.01,0.0,0.01	0.012,0.118,0.045	-0.052		Tetratricopeptide repeat (TPR)-like superfamily protein [Source:TAIR;Acc:AT5G16280]
A3SS	AT5G02230	5	+	449056	449192	449126	449192	448104	448212	3.99633e-05	0.00666274	0.115,0.084,0.05	0.227,0.117,0.206	-0.1		Haloacid dehalogenase-like hydrolase (HAD) superfamily protein [Source:TAIR;Acc:AT5G02230]
A3SS	AT3G09240	3	-	2837294	2837536	2837294	2837430	2837698	2837956	4.13416e-05	0.00684918	0.0,0.0,0.0	0.176,0.246,0.15	-0.191		Protein kinase protein with tetratricopeptide repeat domain [Source:TAIR;Acc:AT3G09240]
A3SS	AT5G04090	5	-	1107581	1107687	1107581	1107660	1108213	1108266	4.22056e-05	0.00694862	0.0,0.031,0.027	0.072,0.055,0.261	-0.11		Plant protein 1589 of unknown function [Source:TAIR;Acc:AT5G04090]
A3SS	AT3G12560	3	-	3984767	3984904	3984767	3984867	3985282	3985550	4.29896e-05	0.00703001	0.0,0.052,0.026	0.178,0.059,0.059	-0.073	TRP3	Telomere repeat-binding protein 3 [Source:UniProtKB/Swiss-Prot;Acc:Q9C7B1]
A3SS	AT2G16940	2	-	7344965	7345197	7344965	7345079	7345399	7345455	4.32337e-05	0.00703001	0.826,0.796,0.874	0.66,0.692,0.766	0.126		Splicing factor, CC1-like [Source:TAIR;Acc:AT2G16940]
A3SS	AT1G30610	1	+	10848963	10849115	10849001	10849115	10848698	10848890	4.70471e-05	0.0075568	0.068,0.016,0.017	0.138,0.111,0.205	-0.118	EMB2279	Pentatricopeptide repeat-containing protein At1g30610, chloroplastic [Source:UniProtKB/Swiss-Prot;Acc:Q9SA76]
A3SS	AT5G66190	5	-	26452372	26452467	26452372	26452465	26452571	26452800	5.02642e-05	0.00802461	0.788,1.0,0.856	1.0,1.0,1.0	-0.119	LFNR1	Ferredoxin--NADP reductase, leaf isozyme 1, chloroplastic [Source:UniProtKB/Swiss-Prot;Acc:Q9FKW6]
A3SS	AT5G66060	5	+	26420723	26420922	26420739	26420922	26420523	26420653	5.26964e-05	0.00836222	1.0,1.0,0.761	0.0,0.548,0.645	0.523	P4H10	Probable prolyl 4-hydroxylase 10 [Source:UniProtKB/Swiss-Prot;Acc:F4JZ24]
A3SS	AT5G22340	5	+	7395981	7396076	7396002	7396076	7395839	7395867	5.62455e-05	0.00887197	0.937,1.0,1.0	0.726,0.841,0.91	0.153		unknown protein; FUNCTIONS IN: molecular_function unknown; INVOLVED IN: biological_process unknown; LOCATED IN: chloroplast; EXPRESSED IN: 22 plant structures; EXPRESSED DURING: 13 growth stages; Has 58 Blast hits to 58 proteins in 20 species: Archa /.../ Bacteria - 0; Metazoa - 0; Fungi - 0; Plants - 57; Viruses - 0; Other Eukaryotes - 1 (source: NCBI BLink). [Source:TAIR;Acc:AT5G22340]
A3SS	AT4G26555	4	-	13405229	13405334	13405229	13405311	13405430	13405465	5.66077e-05	0.00887595	0.797,0.723,0.723	1.0,0.933,1.0	-0.23	FKBP16-1	Peptidyl-prolyl cis-trans isomerase FKBP16-1, chloroplastic [Source:UniProtKB/Swiss-Prot;Acc:Q944B0]
A3SS	AT1G11330	1	+	3811975	3812172	3811978	3812172	3811783	3811891	5.78793e-05	0.00902163	0.139,0.057,0.198	0.0,0.0,0.071	0.108		G-type lectin S-receptor-like serine/threonine-protein kinase At1g11330 [Source:UniProtKB/Swiss-Prot;Acc:Q9SXB8]
A3SS	AT3G57170	3	-	21159823	21159912	21159823	21159878	21160025	21160435	5.87173e-05	0.00909842	1.0,0.732,0.663	1.0,1.0,1.0	-0.202		N-acetylglucosaminyl transferase component family protein / Gpi1 family protein [Source:TAIR;Acc:AT3G57170]
A3SS	AT1G74920	1	-	28142121	28142268	28142121	28142249	28142464	28142744	6.01406e-05	0.00926446	0.933,1.0,1.0	0.817,0.728,1.0	0.129	ALDH10A8	Betaine aldehyde dehydrogenase 1, chloroplastic [Source:UniProtKB/Swiss-Prot;Acc:Q9S795]
A3SS	AT1G78670	1	+	29591635	29591728	29591675	29591728	29590944	29591409	6.0996e-05	0.00933117	0.881,0.866,1.0	1.0,1.0,1.0	-0.084	GGH3	Probable gamma-glutamyl hydrolase 3 [Source:UniProtKB/Swiss-Prot;Acc:Q9ZV85]
A3SS	AT3G23660	3	-	8515873	8516020	8515873	8516016	8516490	8516652	6.12821e-05	0.00933117	0.119,0.1,0.08	0.174,0.324,0.234	-0.144		Sec23/Sec24 protein transport family protein [Source:TAIR;Acc:AT3G23660]
A3SS	AT1G07600	1	-	2338903	2338990	2338903	2338975	2339265	2339321	6.27898e-05	0.00950579	0.699,0.764,0.941	0.869,0.801,1.0	-0.089	MT1A	Metallothionein-like protein 1A [Source:UniProtKB/Swiss-Prot;Acc:P43392]
A3SS	AT1G12740	1	+	4344046	4344171	4344064	4344171	4343890	4343969	6.39557e-05	0.00962698	0.0,0.0,0.0	0.016,0.137,0.149	-0.101	CYP87A2	cytochrome P450, family 87, subfamily A, polypeptide 2 [Source:TAIR;Acc:AT1G12740]
A3SS	AT3G10380	3	-	3226336	3226554	3226336	3226511	3226662	3226756	6.43939e-05	0.00963787	0.1,0.577,0.0	1.0,1.0,0.281	-0.535	SEC8	Exocyst complex component SEC8 [Source:UniProtKB/Swiss-Prot;Acc:Q93YU5]
A3SS	AT3G12150	3	-	3877928	3878013	3877928	3878007	3878233	3878900	6.631e-05	0.00979638	1.0,1.0,0.989	0.964,0.919,0.952	0.051		unknown protein; CONTAINS InterPro DOMAIN/s: Protein of unknown function DUF2048 (InterPro:IPR019149); Has 421 Blast hits to 334 proteins in 155 species: Archae - 2; Bacteria - 147; Metazoa - 215; Fungi - 0; Plants - 43; Viruses - 0; Other Eukaryote /.../ (source: NCBI BLink). [Source:TAIR;Acc:AT3G12150]
A3SS	AT1G11410	1	+	3843719	3843864	3843736	3843864	3843390	3843628	6.5855e-05	0.00979638	1.0,0.961,1.0	0.946,0.889,0.869	0.086		G-type lectin S-receptor-like serine/threonine-protein kinase At1g11410 [Source:UniProtKB/Swiss-Prot;Acc:Q9LPZ3]
A3SS	AT1G04010	1	-	1034121	1034345	1034121	1034338	1034701	1034778	6.65687e-05	0.00979638	0.092,0.194,0.208	0.435,0.687,0.419	-0.349	PSAT	Phospholipid--sterol O-acyltransferase [Source:UniProtKB/Swiss-Prot;Acc:Q4VCM1]
A3SS	AT5G20830	5	-	7053928	7054120	7053928	7054078	7055162	7055195	6.72204e-05	0.00983734	0.125,0.44,0.485	0.863,1.0,0.573	-0.462	SUS1	Sucrose synthase 1 [Source:UniProtKB/Swiss-Prot;Acc:P49040]
A3SS	AT1G02840	1	+	628934	629140	628945	629140	628250	628469	6.80697e-05	0.00990659	1.0,1.0,1.0	0.757,0.75,1.0	0.164	SR34	Serine/arginine-rich-splicing factor SR34 [Source:UniProtKB/Swiss-Prot;Acc:O22315]
A3SS	AT4G33500	4	-	16114222	16114363	16114222	16114289	16114468	16114638	6.96795e-05	0.0100852	0.034,0.023,0.066	0.127,0.069,0.142	-0.072		Probable protein phosphatase 2C 62 [Source:UniProtKB/Swiss-Prot;Acc:Q93V88]
A3SS	AT3G23590	3	+	8470600	8470784	8470677	8470784	8470147	8470358	7.04961e-05	0.0101476	1.0,1.0,0.874	0.685,0.865,0.859	0.155	MED33A	Mediator of RNA polymerase II transcription subunit 33A [Source:UniProtKB/Swiss-Prot;Acc:Q9LUG9]
A3SS	AT4G29380	4	+	14459790	14460038	14459958	14460038	14459547	14459708	7.14251e-05	0.0101608	0.068,0.117,0.038	0.2,0.205,0.173	-0.118		protein kinase family protein / WD-40 repeat family protein [Source:TAIR;Acc:AT4G29380]
A3SS	AT5G38000	5	+	15142482	15142649	15142539	15142649	15142130	15142311	7.17321e-05	0.0101608	1.0,0.965,1.0	0.836,0.973,0.87	0.095		Zinc-binding dehydrogenase family protein [Source:TAIR;Acc:AT5G38000]
A3SS	AT5G03415	5	+	844106	844253	844112	844253	843950	844013	7.17454e-05	0.0101608	0.948,1.0,1.0	0.88,0.864,0.974	0.077	DPB	Transcription factor-like protein DPB [Source:UniProtKB/Swiss-Prot;Acc:Q9FNY2]
A3SS	AT1G27900	1	-	9716178	9716398	9716178	9716339	9716537	9716607	7.22228e-05	0.0101738	0.064,0.066,0.157	0.022,0.02,0.0	0.082		RNA helicase family protein [Source:TAIR;Acc:AT1G27900]
A3SS	AT1G17990	1	-	6193317	6193495	6193317	6193458	6193687	6194093	7.28147e-05	0.0102026	0.192,0.11,0.223	0.075,0.244,0.006	0.067		Putative 12-oxophytodienoate reductase-like protein 2A [Source:UniProtKB/Swiss-Prot;Acc:P0DI08]
A3SS	AT1G04300	1	-	1151953	1152062	1151953	1152048	1152316	1152475	7.36949e-05	0.0102713	1.0,1.0,0.847	0.58,0.932,0.479	0.285		TRAF-like superfamily protein [Source:TAIR;Acc:AT1G04300]
A3SS	AT1G05000	1	+	1426196	1426330	1426234	1426330	1426015	1426109	7.47039e-05	0.0103571	0.0,0.0,0.0	0.202,0.054,0.186	-0.147		Probable tyrosine-protein phosphatase At1g05000 [Source:UniProtKB/Swiss-Prot;Acc:Q9ZVN4]
A3SS	AT5G18240	5	-	6030365	6030581	6030365	6030577	6030663	6030802	7.53939e-05	0.010398	0.123,0.079,0.082	0.238,0.361,0.303	-0.206	MYR1	myb-related protein 1 [Source:TAIR;Acc:AT5G18240]
A3SS	AT3G11720	3	-	3707105	3707220	3707105	3707209	3707302	3707402	7.58937e-05	0.0104125	0.03,0.0,0.0	0.198,0.074,0.0	-0.081		Polyketide cyclase/dehydrase and lipid transport superfamily protein [Source:TAIR;Acc:AT3G11720]
A3SS	AT5G06780	5	-	2096269	2096427	2096269	2096407	2096811	2097129	7.68488e-05	0.0104889	0.307,1.0,0.151	1.0,1.0,0.639	-0.394	EML2	Protein EMSY-LIKE 2 [Source:UniProtKB/Swiss-Prot;Acc:Q9FG29]
A3SS	AT1G07600	1	-	2338903	2338997	2338903	2338975	2339265	2339321	7.72848e-05	0.010494	0.694,0.76,0.939	0.865,0.796,1.0	-0.089	MT1A	Metallothionein-like protein 1A [Source:UniProtKB/Swiss-Prot;Acc:P43392]
A3SS	AT1G19485	1	+	6749983	6750049	6749990	6750049	6749825	6749898	8.03534e-05	0.010772	1.0,1.0,1.0	0.963,0.958,0.847	0.077		Transducin/WD40 repeat-like superfamily protein [Source:TAIR;Acc:AT1G19485]
A3SS	AT1G52630	1	-	19607836	19607941	19607836	19607907	19608198	19608278	8.03457e-05	0.010772	0.235,0.38,0.116	0.711,0.61,0.499	-0.363		O-fucosyltransferase family protein [Source:TAIR;Acc:AT1G52630]
A3SS	AT1G44900	1	+	16971658	16971866	16971662	16971866	16971348	16971568	8.05592e-05	0.010772	1.0,1.0,0.975	0.913,0.797,1.0	0.088	MCM2	DNA replication licensing factor MCM2 [Source:UniProtKB/Swiss-Prot;Acc:Q9LPD9]
A3SS	AT4G16620	4	-	9359254	9359436	9359254	9359371	9359513	9359579	8.11127e-05	0.0107913	0.0,0.0,0.0	0.44,0.167,0.0	-0.202		WAT1-related protein At4g16620 [Source:UniProtKB/Swiss-Prot;Acc:F4JMI7]
A3SS	AT1G78670	1	+	29591644	29591728	29591675	29591728	29590944	29591409	8.26159e-05	0.010936	0.888,0.869,1.0	1.0,1.0,1.0	-0.081	GGH3	Probable gamma-glutamyl hydrolase 3 [Source:UniProtKB/Swiss-Prot;Acc:Q9ZV85]
A3SS	AT2G01350	2	-	165914	166085	165914	166072	166199	166283	8.43405e-05	0.0111085	0.41,0.481,0.0	0.0,0.066,0.0	0.275	QPT	Nicotinate-nucleotide pyrophosphorylase [carboxylating], chloroplastic [Source:UniProtKB/Swiss-Prot;Acc:Q9ZU32]
A3SS	AT5G65640	5	+	26238551	26238721	26238563	26238721	26238239	26238422	8.52468e-05	0.011172	0.736,1.0,1.0	0.482,0.651,0.411	0.397	BHLH93	Transcription factor bHLH93 [Source:UniProtKB/Swiss-Prot;Acc:Q9LSL1]
A3SS	AT2G26540	2	-	11289194	11289357	11289194	11289308	11289576	11289643	8.59307e-05	0.0112059	0.0,1.0,0.0	1.0,1.0,0.431	-0.477	UROS	Uroporphyrinogen-III synthase, chloroplastic [Source:UniProtKB/Swiss-Prot;Acc:O48721]
A3SS	AT5G04510	5	+	1288310	1288433	1288323	1288433	1288132	1288241	8.68691e-05	0.0112254	0.683,0.832,0.893	1.0,1.0,1.0	-0.197	PDPK1	3-phosphoinositide-dependent protein kinase 1 [Source:UniProtKB/Swiss-Prot;Acc:Q9XF67]
A3SS	AT3G48820	3	-	18102592	18102677	18102592	18102632	18102764	18102911	8.69331e-05	0.0112254	0.351,0.555,0.265	1.0,0.589,0.814	-0.411		Glycosyltransferase family 29 (sialyltransferase) family protein [Source:TAIR;Acc:AT3G48820]
A3SS	AT5G19330	5	-	6512205	6512366	6512205	6512363	6512448	6512759	8.76817e-05	0.0112669	0.214,0.198,0.215	0.332,0.284,0.347	-0.112	ARIA	ARM REPEAT PROTEIN INTERACTING WITH ABF2 [Source:UniProtKB/Swiss-Prot;Acc:B9DHT4]
A3SS	AT5G03406	5	+	840777	840951	840821	840951	840593	840682	9.27286e-05	0.0118576	1.0,0.895,0.608	0.318,0.823,0.521	0.28		Class II aaRS and biotin synthetases superfamily protein [Source:TAIR;Acc:AT5G03406]
A3SS	AT5G56850	5	-	22987289	22987420	22987289	22987414	22987498	22987572	9.33004e-05	0.011873	1.0,1.0,1.0	0.969,0.851,0.959	0.074		unknown protein; EXPRESSED IN: 21 plant structures; EXPRESSED DURING: 13 growth stages; Has 35333 Blast hits to 34131 proteins in 2444 species: Archae - 798; Bacteria - 22429; Metazoa - 974; Fungi - 991; Plants - 531; Viruses - 0; Other Eukaryotes - /.../(source: NCBI BLink). [Source:TAIR;Acc:AT5G56850]
A3SS	AT4G38230	4	-	17931200	17931371	17931200	17931308	17931478	17931511	9.5875e-05	0.012142	0.414,1.0,0.414	1.0,1.0,1.0	-0.391	CPK26	Calcium-dependent protein kinase 26 [Source:UniProtKB/Swiss-Prot;Acc:Q9SZM3]
A3SS	AT1G66070	1	-	24596392	24596549	24596392	24596544	24596640	24596788	0.000105583	0.0131813	0.928,1.0,1.0	0.859,0.941,0.967	0.054		Translation initiation factor eIF3 subunit [Source:TAIR;Acc:AT1G66070]
A3SS	AT4G18490	4	+	10206722	10206860	10206725	10206860	10206541	10206620	0.000105129	0.0131813	0.664,1.0,0.798	0.712,0.497,0.11	0.381		Uncharacterized protein At4g18490 [Source:UniProtKB/Swiss-Prot;Acc:P16128]
A3SS	AT1G69370	1	+	26080720	26080811	26080732	26080811	26080419	26080645	0.000105305	0.0131813	0.566,1.0,0.736	1.0,1.0,1.0	-0.233	CM3	Chorismate mutase 3, chloroplastic [Source:UniProtKB/Swiss-Prot;Acc:Q9C544]
A3SS	AT3G62620	3	+	23160198	23160320	23160204	23160320	23160035	23160075	0.000107587	0.0133682	0.906,1.0,0.944	0.667,0.724,0.96	0.166		sucrose-phosphatase-related [Source:TAIR;Acc:AT3G62620]
A3SS	AT3G26020	3	+	9514037	9514192	9514079	9514192	9513695	9513854	0.000111526	0.0137925	0.844,0.909,0.877	0.673,0.754,0.805	0.133	B'ETA	Serine/threonine protein phosphatase 2A 59 kDa regulatory subunit B' eta isoform [Source:UniProtKB/Swiss-Prot;Acc:Q9LU89]
A3SS	AT1G65620	1	+	24399583	24399829	24399712	24399829	24399077	24399314	0.000114996	0.0141553	0.32,0.047,0.082	0.0,0.0,0.0	0.15	LBD6	LOB domain-containing protein 6 [Source:UniProtKB/Swiss-Prot;Acc:O04479]
A3SS	AT4G21770	4	-	11565579	11565834	11565579	11565823	11565921	11566053	0.000120838	0.0146687	1.0,1.0,0.966	0.81,0.906,1.0	0.083		RNA pseudouridine synthase 6, chloroplastic [Source:UniProtKB/Swiss-Prot;Acc:Q9SVS0]
A3SS	AT5G64520	5	+	25788538	25788716	25788546	25788716	25788033	25788402	0.000120468	0.0146687	0.0,0.193,0.0	0.064,0.489,0.401	-0.254	XRCC2	DNA repair protein XRCC2 homolog [Source:UniProtKB/Swiss-Prot;Acc:Q682D3]
A3SS	AT2G22990	2	+	9788896	9788971	9788919	9788971	9788751	9788836	0.000119997	0.0146687	1.0,0.466,1.0	0.521,0.466,0.303	0.392	SCPL8	Serine carboxypeptidase-like 8 [Source:UniProtKB/Swiss-Prot;Acc:Q8RUW5]
A3SS	AT3G62750	3	+	23214880	23215111	23215039	23215111	23214746	23214796	0.00012937	0.0156324	0.75,0.412,0.0	1.0,1.0,0.636	-0.491	BGLU8	Beta-glucosidase 8 [Source:UniProtKB/Swiss-Prot;Acc:Q67XN2]
A3SS	AT4G24480	4	+	12652271	12652375	12652343	12652375	12651996	12652112	0.000130208	0.0156618	0.145,0.0,0.0	0.404,0.22,0.162	-0.214		Protein kinase superfamily protein [Source:TAIR;Acc:AT4G24480]
A3SS	AT4G17150	4	+	9639329	9639428	9639336	9639428	9639128	9639255	0.00013169	0.0156967	1.0,1.0,1.0	0.606,0.658,1.0	0.245		alpha/beta-Hydrolases superfamily protein [Source:TAIR;Acc:AT4G17150]
A3SS	AT3G25572	3	-	9288702	9288915	9288702	9288882	9289081	9289151	0.000131483	0.0156967	0.732,0.801,0.78	0.57,0.631,0.653	0.153	CPuORF11	conserved peptide upstream open reading frame 11 [Source:TAIR;Acc:AT3G25572]
A3SS	AT2G03667	2	+	1115954	1116060	1116006	1116060	1115642	1115875	0.000136844	0.0162376	0.91,0.91,1.0	0.679,0.774,0.657	0.237		Asparagine synthase family protein [Source:TAIR;Acc:AT2G03667]
A3SS	AT3G62310	3	-	23058276	23058520	23058276	23058488	23058773	23059858	0.000140724	0.0166231	0.943,1.0,1.0	0.829,0.86,0.95	0.101		RNA helicase family protein [Source:TAIR;Acc:AT3G62310]
A3SS	AT2G20250	2	-	8735145	8735203	8735145	8735192	8735279	8735398	0.000142757	0.0166738	0.738,1.0,0.838	1.0,1.0,1.0	-0.141		unknown protein; Has 10 Blast hits to 10 proteins in 6 species: Archae - 0; Bacteria - 0; Metazoa - 0; Fungi - 2; Plants - 8; Viruses - 0; Other Eukaryotes - 0 (source: NCBI BLink). [Source:TAIR;Acc:AT2G20250]
A3SS	AT1G10410	1	-	3417736	3417904	3417736	3417892	3417992	3418128	0.00014288	0.0166738	0.318,0.237,0.7	1.0,1.0,0.7	-0.482		Protein of unknown function (DUF1336) [Source:TAIR;Acc:AT1G10410]
A3SS	AT4G00800	4	-	341194	341337	341194	341260	341448	341550	0.000143052	0.0166738	1.0,1.0,0.917	0.881,0.765,0.929	0.114		transducin family protein / WD-40 repeat family protein [Source:TAIR;Acc:AT4G00800]
A3SS	AT4G39050	4	+	18194101	18194185	18194115	18194185	18193915	18194013	0.000143796	0.0166867	1.0,0.88,1.0	1.0,0.648,0.563	0.223		Kinesin motor family protein [Source:TAIR;Acc:AT4G39050]
A3SS	AT1G79280	1	-	29827914	29827964	29827914	29827958	29828408	29828487	0.000148031	0.0171028	0.959,0.943,0.874	0.983,1.0,1.0	-0.069	NUA	Nuclear-pore anchor [Source:UniProtKB/Swiss-Prot;Acc:A4GSN8]
A3SS	AT5G63820	5	+	25542660	25542893	25542671	25542893	25542518	25542594	0.000148937	0.0171323	1.0,0.849,1.0	1.0,0.718,0.701	0.143		UPF0725 protein At5g63820 [Source:UniProtKB/Swiss-Prot;Acc:Q9FN07]
A3SS	AT5G07350	5	-	2324739	2324906	2324739	2324897	2325270	2325419	0.000150405	0.017226	0.773,0.865,0.802	0.634,0.639,0.71	0.152	Tudor1	TUDOR-SN protein 1 [Source:TAIR;Acc:AT5G07350]
A3SS	AT5G57240	5	+	23193970	23194196	23193981	23194196	23193431	23193589	0.000160742	0.0183302	1.0,1.0,0.863	1.0,0.759,0.694	0.137	ORP4C	Oxysterol-binding protein-related protein 4C [Source:UniProtKB/Swiss-Prot;Acc:Q9LVD4]
A3SS	AT3G26020	3	+	9514040	9514192	9514079	9514192	9513695	9513854	0.000165319	0.0186044	0.64,0.747,0.745	0.399,0.507,0.521	0.235	B'ETA	Serine/threonine protein phosphatase 2A 59 kDa regulatory subunit B' eta isoform [Source:UniProtKB/Swiss-Prot;Acc:Q9LU89]
A3SS	AT4G10060	4	+	6291266	6291322	6291275	6291322	6291057	6291162	0.000165972	0.0186044	0.631,0.723,0.275	1.0,0.792,0.851	-0.338		Beta-glucosidase, GBA2 type family protein [Source:TAIR;Acc:AT4G10060]
A3SS	AT2G01490	2	+	221643	221727	221679	221727	221465	221587	0.000165748	0.0186044	1.0,0.871,0.708	1.0,1.0,0.907	-0.109	PAHX	Phytanoyl-CoA dioxygenase [Source:UniProtKB/Swiss-Prot;Acc:Q9ZVF6]
A3SS	AT2G42120	2	-	17565740	17565780	17565740	17565777	17565908	17566032	0.00017002	0.0189774	0.082,0.045,0.058	0.212,0.171,0.357	-0.185	POLD2	DNA polymerase delta small subunit [Source:UniProtKB/Swiss-Prot;Acc:O48520]
A3SS	AT1G13820	1	+	4736224	4736465	4736415	4736465	4736053	4736148	0.000174042	0.0189797	0.0,0.333,1.0	0.333,1.0,1.0	-0.333		alpha/beta-Hydrolases superfamily protein [Source:TAIR;Acc:AT1G13820]
A3SS	AT2G20815	2	+	8961641	8961755	8961644	8961755	8961473	8961563	0.000171265	0.0189797	0.0,0.0,0.0	0.712,0.165,0.141	-0.339	QWRF3	QWRF motif-containing protein 3 [Source:UniProtKB/Swiss-Prot;Acc:Q8S8I1]
A3SS	AT1G80170	1	-	30155211	30155343	30155211	30155333	30155473	30155713	0.000174364	0.0189797	1.0,1.0,1.0	0.868,0.71,1.0	0.141		Probable polygalacturonase At1g80170 [Source:UniProtKB/Swiss-Prot;Acc:Q94AJ5]
A3SS	AT3G62750	3	+	23214872	23215111	23215039	23215111	23214746	23214796	0.000172615	0.0189797	0.875,0.63,0.2	1.0,1.0,0.733	-0.343	BGLU8	Beta-glucosidase 8 [Source:UniProtKB/Swiss-Prot;Acc:Q67XN2]
A3SS	AT1G24340	1	+	8636886	8637123	8636948	8637123	8636756	8636804	0.000172528	0.0189797	0.0,0.0,0.013	0.074,0.0,0.1	-0.054	EMB260	FAD/NAD(P)-binding oxidoreductase family protein [Source:TAIR;Acc:AT1G24340]
A3SS	AT1G54370	1	-	20294634	20294743	20294634	20294732	20294824	20294885	0.000173375	0.0189797	0.015,0.072,0.01	0.119,0.093,0.094	-0.07	NHX5	Sodium/hydrogen exchanger 5 [Source:UniProtKB/Swiss-Prot;Acc:Q8S396]
A3SS	AT3G56050	3	-	20800600	20800943	20800600	20800779	20801125	20801165	0.000184569	0.0200079	0.9,0.902,0.981	0.867,0.782,0.868	0.089		Probable inactive receptor-like protein kinase At3g56050 [Source:UniProtKB/Swiss-Prot;Acc:Q9LYN6]
A3SS	AT4G17330	4	-	9697326	9697425	9697326	9697419	9697560	9697578	0.000187508	0.0202193	0.0,0.195,0.492	0.563,0.492,0.659	-0.342	ATG2484-1	G2484-1 protein [Source:TAIR;Acc:AT4G17330]
A3SS	AT4G24480	4	+	12651748	12651893	12651761	12651893	12651356	12651655	0.000188055	0.0202193	1.0,1.0,1.0	0.987,0.945,0.908	0.053		Protein kinase superfamily protein [Source:TAIR;Acc:AT4G24480]
A3SS	AT1G79630	1	-	29964905	29965150	29964905	29965147	29965655	29965795	0.000192586	0.020469	1.0,1.0,1.0	0.767,0.664,1.0	0.19		Probable protein phosphatase 2C 18 [Source:UniProtKB/Swiss-Prot;Acc:Q8RXZ4]
A3SS	AT1G56280	1	-	21073305	21073473	21073305	21073471	21073560	21073793	0.00019313	0.020469	1.0,1.0,1.0	1.0,0.616,1.0	0.128	ATDI19	drought-induced 19 [Source:TAIR;Acc:AT1G56280]
A3SS	AT1G52155	1	+	19418051	19418133	19418056	19418133	19417665	19417803	0.000193916	0.020469	0.0,0.098,0.026	0.124,0.03,0.203	-0.078		unknown protein; Has 37 Blast hits to 37 proteins in 13 species: Archae - 0; Bacteria - 0; Metazoa - 0; Fungi - 0; Plants - 35; Viruses - 0; Other Eukaryotes - 2 (source: NCBI BLink). [Source:TAIR;Acc:AT1G52155]
A3SS	AT2G47510	2	+	19498601	19498756	19498605	19498756	19498367	19498488	0.000194262	0.020469	1.0,1.0,1.0	0.91,0.914,1.0	0.059	FUM1	Fumarate hydratase 1, mitochondrial [Source:UniProtKB/Swiss-Prot;Acc:P93033]
A3SS	AT2G20495	2	+	8834672	8834757	8834683	8834757	8834529	8834601	0.000201434	0.0211401	0.118,0.105,0.099	0.021,0.028,0.0	0.091		CONTAINS InterPro DOMAIN/s: Serine-threonine protein kinase 19 (InterPro:IPR018865); Has 155 Blast hits to 154 proteins in 53 species: Archae - 0; Bacteria - 0; Metazoa - 95; Fungi - 5; Plants - 34; Viruses - 0; Other Eukaryotes - 21 (source: NCBI BLink). [Source:TAIR;Acc:AT2G20495]
A3SS	AT3G46490	3	+	17116831	17117032	17116983	17117032	17116302	17116354	0.000203136	0.0212341	0.25,0.0,0.0	0.322,0.18,0.419	-0.224		2-oxoglutarate (2OG) and Fe(II)-dependent oxygenase superfamily protein [Source:TAIR;Acc:AT3G46490]
A3SS	AT4G28020	4	-	13934687	13934794	13934687	13934788	13934937	13935059	0.00021625	0.0223999	0.217,0.154,0.078	0.0,0.0,0.042	0.136		unknown protein; CONTAINS InterPro DOMAIN/s: Uncharacterised protein family UPF0066 (InterPro:IPR001378); Has 30201 Blast hits to 17322 proteins in 780 species: Archae - 12; Bacteria - 1396; Metazoa - 17338; Fungi - 3422; Plants - 5037; Viruses - 0; /.../ Eukaryotes - 2996 (source: NCBI BLink). [Source:TAIR;Acc:AT4G28020]
A3SS	AT1G27752	1	+	9664127	9664353	9664239	9664353	9663958	9664053	0.000216839	0.0223999	0.026,0.059,0.037	0.135,0.05,0.138	-0.067		Ubiquitin system component Cue protein [Source:TAIR;Acc:AT1G27752]
A3SS	AT2G14680	2	+	6280418	6280635	6280582	6280635	6280160	6280301	0.000218898	0.0225243	0.667,1.0,1.0	0.677,0.647,1.0	0.114	MEE13	myosin heavy chain-related [Source:TAIR;Acc:AT2G14680]
A3SS	AT5G54260	5	+	22035432	22035509	22035448	22035509	22035297	22035360	0.000225123	0.0229852	0.295,0.0,0.094	0.033,0.0,0.0	0.119	MRE11	Double-strand break repair protein MRE11 [Source:UniProtKB/Swiss-Prot;Acc:Q9XGM2]
A3SS	AT5G41370	5	+	16552478	16552572	16552548	16552572	16552306	16552363	0.000229036	0.0232944	1.0,1.0,1.0	0.855,0.822,1.0	0.108	XPB1	DNA repair helicase XPB1 [Source:UniProtKB/Swiss-Prot;Acc:Q38861]
A3SS	AT1G23020	1	-	8152669	8152861	8152669	8152857	8152967	8153070	0.000233981	0.0237058	1.0,1.0,1.0	1.0,0.774,1.0	0.075	FRO3	Ferric reduction oxidase 3, mitochondrial [Source:UniProtKB/Swiss-Prot;Acc:F4I4K7]
A3SS	AT2G01490	2	+	221669	221727	221679	221727	221465	221587	0.000239831	0.0242055	1.0,0.887,0.747	1.0,1.0,0.883	-0.083	PAHX	Phytanoyl-CoA dioxygenase [Source:UniProtKB/Swiss-Prot;Acc:Q9ZVF6]
A3SS	AT1G10900	1	-	3636462	3636483	3636462	3636476	3637022	3637141	0.000242787	0.0244103	1.0,1.0,0.852	0.845,0.766,0.852	0.13	PIP5K7	Phosphatidylinositol 4-phosphate 5-kinase 7 [Source:UniProtKB/Swiss-Prot;Acc:Q9SUI2]
A3SS	AT1G01380	1	+	147451	147548	147454	147548	147152	147333	0.000250724	0.0250173	1.0,1.0,1.0	0.88,1.0,0.819	0.1	ETC1	MYB-like transcription factor ETC1 [Source:UniProtKB/Swiss-Prot;Acc:Q9LNI5]
A3SS	AT3G62310	3	-	23058276	23058514	23058276	23058488	23058773	23059858	0.000259298	0.0255821	0.75,1.0,1.0	0.631,0.729,0.92	0.157		RNA helicase family protein [Source:TAIR;Acc:AT3G62310]
A3SS	AT5G09225	5	-	2870256	2870407	2870256	2870368	2870572	2870624	0.000260769	0.0256312	0.832,0.803,0.763	0.656,0.606,0.721	0.138		unknown protein; FUNCTIONS IN: molecular_function unknown; INVOLVED IN: biological_process unknown; LOCATED IN: endomembrane system; Has 35333 Blast hits to 34131 proteins in 2444 species: Archae - 798; Bacteria - 22429; Metazoa - 974; Fungi - 991; /.../ - 531; Viruses - 0; Other Eukaryotes - 9610 (source: NCBI BLink). [Source:TAIR;Acc:AT5G09225]
A3SS	AT3G48190	3	+	17813949	17814010	17813995	17814010	17813702	17813844	0.00027122	0.0265594	1.0,1.0,1.0	0.915,0.729,0.898	0.153	ATM	ataxia-telangiectasia mutated [Source:TAIR;Acc:AT3G48190]
A3SS	AT5G14850	5	-	4802791	4803022	4802791	4803008	4803130	4803412	0.000275186	0.026848	0.058,0.187,0.197	0.535,0.338,0.479	-0.303		Alg9-like mannosyltransferase family [Source:TAIR;Acc:AT5G14850]
A3SS	AT4G02120	4	+	942473	942663	942609	942663	942202	942265	0.00028352	0.027559	0.766,1.0,0.589	0.84,1.0,1.0	-0.162		CTP synthase family protein [Source:TAIR;Acc:AT4G02120]
A3SS	AT1G77000	1	+	28940749	28941105	28940865	28941105	28940146	28940418	0.000285765	0.0275737	0.629,0.414,0.458	0.203,0.18,0.026	0.364	SKP2B	F-box protein SKP2B [Source:UniProtKB/Swiss-Prot;Acc:O49286]
A3SS	AT1G44910	1	+	16975887	16975957	16975929	16975957	16975603	16975750	0.000285474	0.0275737	0.972,0.982,1.0	0.947,0.918,0.876	0.071	PRP40A	Pre-mRNA-processing protein 40A [Source:UniProtKB/Swiss-Prot;Acc:B6EUA9]
A3SS	AT1G58602	1	+	21763877	21764050	21764032	21764050	21761384	21763787	0.000289116	0.0277952	0.936,0.9,0.871	1.0,1.0,1.0	-0.098		Probable disease resistance protein At1g58602 [Source:UniProtKB/Swiss-Prot;Acc:Q8W3K0]
A3SS	AT5G03406	5	+	840782	840951	840821	840951	840593	840682	0.000291954	0.0278798	1.0,0.614,0.614	0.137,0.799,0.0	0.431		Class II aaRS and biotin synthetases superfamily protein [Source:TAIR;Acc:AT5G03406]
A3SS	AT3G51830	3	+	19223136	19223236	19223156	19223236	19222914	19222987	0.000296042	0.0280305	0.986,0.983,1.0	0.969,0.953,0.879	0.056	SAC8	Phosphoinositide phosphatase SAC8 [Source:UniProtKB/Swiss-Prot;Acc:Q96328]
A3SS	AT2G47390	2	-	19444639	19444772	19444639	19444763	19444862	19445844	0.000297127	0.0280305	1.0,0.826,1.0	0.792,0.723,0.487	0.275	GEP	Prolyl oligopeptidase family protein [Source:TAIR;Acc:AT2G47390]
A3SS	AT2G02410	2	+	633593	633791	633616	633791	633399	633524	0.000300036	0.0280305	0.753,0.537,0.111	0.179,0.08,0.0	0.381		unknown protein; CONTAINS InterPro DOMAIN/s: Protein of unknown function DUF901 (InterPro:IPR010298); Has 1151 Blast hits to 1151 proteins in 597 species: Archae - 0; Bacteria - 1105; Metazoa - 0; Fungi - 0; Plants - 42; Viruses - 0; Other Eukaryote /.../(source: NCBI BLink). [Source:TAIR;Acc:AT2G02410]
A3SS	AT3G02770	3	-	601700	601929	601700	601889	602136	602259	0.000300076	0.0280305	0.661,1.0,1.0	1.0,1.0,1.0	-0.113		Putative 4-hydroxy-4-methyl-2-oxoglutarate aldolase 1 [Source:UniProtKB/Swiss-Prot;Acc:Q9M8R9]
A3SS	AT1G23020	1	-	8152669	8152873	8152669	8152857	8152967	8153070	0.000299532	0.0280305	1.0,1.0,1.0	1.0,0.745,1.0	0.085	FRO3	Ferric reduction oxidase 3, mitochondrial [Source:UniProtKB/Swiss-Prot;Acc:F4I4K7]
A3SS	AT4G36790	4	+	17337054	17337350	17337127	17337350	17336684	17336982	0.000297379	0.0280305	0.952,0.97,0.948	0.811,0.924,0.796	0.113		Major facilitator superfamily protein [Source:TAIR;Acc:AT4G36790]
A3SS	AT1G58060	1	-	21497140	21497241	21497140	21497189	21497468	21497555	0.000308115	0.0286797	1.0,0.887,0.915	0.713,0.698,0.909	0.161		RNA helicase family protein [Source:TAIR;Acc:AT1G58060]
A3SS	AT3G59280	3	-	21909486	21909671	21909486	21909594	21909882	21909970	0.000323991	0.0300513	0.705,0.835,0.751	0.819,0.969,1.0	-0.166	TXR1	Protein Transporter, Pam16 [Source:TAIR;Acc:AT3G59280]
A3SS	AT3G63530	3	-	23456969	23457072	23456969	23457014	23457163	23457198	0.000325248	0.030062	0.029,0.029,0.077	0.044,0.204,0.33	-0.148	BB	E3 ubiquitin ligase BIG BROTHER [Source:UniProtKB/Swiss-Prot;Acc:Q8L649]
A3SS	AT1G09230	1	-	2979876	2980091	2979876	2980072	2980210	2980298	0.000327214	0.030138	1.0,1.0,1.0	0.543,0.877,0.641	0.313	SNRNP65	U11/U12 small nuclear ribonucleoprotein 65 kDa protein [Source:UniProtKB/Swiss-Prot;Acc:Q8RWV8]
A3SS	AT4G33000	4	+	15925523	15925765	15925656	15925765	15925228	15925329	0.000331396	0.0303112	1.0,0.841,1.0	0.801,0.768,1.0	0.091	CBL10	Calcineurin B-like protein 10 [Source:UniProtKB/Swiss-Prot;Acc:Q7FRS8]
A3SS	AT4G32360	4	+	15623620	15623822	15623624	15623822	15623443	15623505	0.000351586	0.0319361	1.0,1.0,1.0	0.967,0.855,0.71	0.156	MFDR	NADPH:adrenodoxin oxidoreductase, mitochondrial [Source:UniProtKB/Swiss-Prot;Acc:Q8W3L1]
A3SS	AT3G44310	3	+	15987073	15987302	15987128	15987302	15986863	15987030	0.000354904	0.0320167	1.0,1.0,0.824	1.0,1.0,1.0	-0.059	NIT1	Nitrilase 1 [Source:UniProtKB/Swiss-Prot;Acc:P32961]
A3SS	AT1G03430	1	+	848613	848713	848641	848713	848384	848497	0.000359788	0.0323465	0.053,0.038,0.016	0.089,0.095,0.097	-0.058	AHP5	Histidine-containing phosphotransfer protein 5 [Source:UniProtKB/Swiss-Prot;Acc:Q8L9T7]
A3SS	AT1G30420	1	+	10750650	10750717	10750660	10750717	10750241	10750464	0.000368343	0.033003	0.187,0.044,0.062	0.0,0.0,0.073	0.073	ABCC11	ABC transporter C family member 11 [Source:UniProtKB/Swiss-Prot;Acc:Q9C8H1]
A3SS	AT3G04940	3	+	1365810	1365940	1365837	1365940	1365655	1365722	0.000372908	0.0332988	1.0,0.299,1.0	0.39,0.0,0.532	0.459	CYSD1	Bifunctional L-3-cyanoalanine synthase/cysteine synthase D1 [Source:UniProtKB/Swiss-Prot;Acc:Q9S6Z7]
A3SS	AT3G53930	3	+	19968078	19968159	19968082	19968159	19967907	19968001	0.00038445	0.0341368	0.945,0.934,1.0	0.6,0.907,0.923	0.15		Protein kinase superfamily protein [Source:TAIR;Acc:AT3G53930]
A3SS	AT5G57580	5	-	23317585	23317736	23317585	23317651	23317950	23318125	0.000384885	0.0341368	0.953,0.926,0.867	1.0,1.0,1.0	-0.085	CBP60B	Calmodulin-binding protein 60 B [Source:UniProtKB/Swiss-Prot;Acc:Q9FKL6]
A3SS	AT1G17140	1	-	5858247	5858344	5858247	5858310	5858452	5858550	0.000389298	0.0344124	0.0,0.0,0.0	0.052,0.061,0.194	-0.102	ICR1	Interactor of constitutive active ROPs 1 [Source:UniProtKB/Swiss-Prot;Acc:Q8LE98]
A3SS	AT3G57630	3	-	21342923	21343152	21342923	21343065	21343545	21343796	0.000403101	0.0351333	0.932,0.843,0.919	1.0,1.0,0.957	-0.088		exostosin family protein [Source:TAIR;Acc:AT3G57630]
A3SS	AT5G19620	5	+	6624583	6624674	6624591	6624674	6624127	6624217	0.000400063	0.0351333	0.089,0.107,0.042	0.0,0.0,0.052	0.062	OEP80	Outer envelope protein 80, chloroplastic [Source:UniProtKB/Swiss-Prot;Acc:Q9C5J8]
A3SS	AT5G09230	5	+	2871452	2871695	2871608	2871695	2871376	2871429	0.000404123	0.0351333	0.0,0.0,0.0	0.125,0.2,0.032	-0.119	SRT2	NAD-dependent protein deacetylase SRT2 [Source:UniProtKB/Swiss-Prot;Acc:Q94AQ6]
A3SS	AT1G28090	1	+	9797407	9797502	9797425	9797502	9797256	9797329	0.000410286	0.0354267	0.075,0.091,0.05	0.0,0.0,0.0	0.072		Polynucleotide adenylyltransferase family protein [Source:TAIR;Acc:AT1G28090]
A3SS	AT1G08210	1	-	2578314	2578559	2578314	2578397	2578864	2579092	0.000411301	0.0354267	1.0,1.0,0.902	0.75,0.778,1.0	0.125		Eukaryotic aspartyl protease family protein [Source:TAIR;Acc:AT1G08210]
A3SS	AT3G44740	3	-	16295969	16296330	16295969	16296153	16296399	16296454	0.000414926	0.035487	0.545,0.583,0.429	0.852,0.789,1.0	-0.361		Class II aaRS and biotin synthetases superfamily protein [Source:TAIR;Acc:AT3G44740]
A3SS	AT4G12790	4	-	7518847	7518926	7518847	7518913	7519325	7519422	0.000413844	0.035487	1.0,0.977,1.0	0.706,1.0,1.0	0.09		P-loop containing nucleoside triphosphate hydrolases superfamily protein [Source:TAIR;Acc:AT4G12790]
A3SS	AT3G19670	3	-	6832902	6833018	6832902	6833014	6833107	6833177	0.000416994	0.0355484	1.0,1.0,1.0	0.831,0.359,1.0	0.27	PRP40B	Pre-mRNA-processing protein 40B [Source:UniProtKB/Swiss-Prot;Acc:F4JCC1]
A3SS	AT1G18730	1	+	6461843	6461910	6461855	6461910	6461173	6461389	0.000419116	0.035614	0.867,1.0,0.482	0.848,0.259,0.0	0.414	PNSB4	Photosynthetic NDH subunit of subcomplex B 4, chloroplastic [Source:UniProtKB/Swiss-Prot;Acc:Q8RXS1]
A3SS	AT3G59310	3	-	21922848	21923062	21922848	21922917	21923173	21923254	0.000420809	0.0356301	0.821,1.0,0.921	0.504,0.681,1.0	0.186		Eukaryotic protein of unknown function (DUF914) [Source:TAIR;Acc:AT3G59310]
A3SS	AT1G09230	1	-	2980021	2980091	2980021	2980080	2980210	2980298	0.000423582	0.0356485	0.0,0.0,0.0	0.118,0.114,0.0	-0.077	SNRNP65	U11/U12 small nuclear ribonucleoprotein 65 kDa protein [Source:UniProtKB/Swiss-Prot;Acc:Q8RWV8]
A3SS	AT1G25290	1	+	8868321	8868397	8868323	8868397	8868138	8868235	0.000427105	0.0358202	1.0,1.0,1.0	1.0,0.652,1.0	0.116	RBL10	RHOMBOID-like protein 10 [Source:TAIR;Acc:AT1G25290]
A3SS	AT5G64600	5	+	25826745	25826920	25826786	25826920	25826323	25826452	0.000428341	0.0358202	0.759,0.825,0.892	1.0,1.0,1.0	-0.175		O-fucosyltransferase family protein [Source:TAIR;Acc:AT5G64600]
A3SS	AT2G39250	2	-	16389614	16389694	16389614	16389680	16389826	16389954	0.000430584	0.0358938	0.933,0.962,0.903	0.979,0.988,1.0	-0.056	SNZ	AP2-like ethylene-responsive transcription factor SNZ [Source:UniProtKB/Swiss-Prot;Acc:Q6PV67]
A3SS	AT1G16610	1	-	5677153	5677376	5677153	5677355	5677465	5677634	0.000447192	0.0370439	0.887,0.799,0.897	0.71,0.726,0.8	0.116	SR45	Serine/arginine-rich splicing factor SR45 [Source:UniProtKB/Swiss-Prot;Acc:Q9SEE9]
A3SS	AT5G47440	5	-	19244038	19244091	19244038	19244088	19244165	19244345	0.000466295	0.0382816	0.297,0.208,0.0	0.0,0.0,0.0	0.168		Plant protein of unknown function (DUF828) with plant pleckstrin homology-like region [Source:TAIR;Acc:AT5G47440]
A3SS	AT5G19220	5	-	6465049	6465148	6465049	6465099	6465203	6465316	0.000476804	0.0390062	0.532,0.274,0.675	0.928,0.801,0.763	-0.337	ADG2	Glucose-1-phosphate adenylyltransferase large subunit 1, chloroplastic [Source:UniProtKB/Swiss-Prot;Acc:P55229]
A3SS	AT1G08210	1	-	2578314	2578504	2578314	2578397	2578864	2579092	0.000485278	0.0395764	1.0,1.0,0.911	0.768,0.804,1.0	0.113		Eukaryotic aspartyl protease family protein [Source:TAIR;Acc:AT1G08210]
A3SS	AT3G60510	3	-	22358200	22358297	22358200	22358286	22358496	22358581	0.00049078	0.0399016	0.0,0.0,0.0	0.213,0.0,0.0	-0.071		3-hydroxyisobutyryl-CoA hydrolase-like protein 1, mitochondrial [Source:UniProtKB/Swiss-Prot;Acc:Q5XF59]
A3SS	AT1G18090	1	+	6225865	6226015	6225878	6226015	6225743	6225788	0.000503487	0.0406836	1.0,1.0,1.0	0.676,1.0,0.96	0.121		5'-3' exonuclease family protein [Source:TAIR;Acc:AT1G18090]
A3SS	AT3G04490	3	+	1205849	1205923	1205889	1205923	1205463	1205563	0.000514431	0.0412798	1.0,0.971,0.952	0.928,0.88,0.858	0.086		unknown protein; BEST Arabidopsis thaliana protein match is: unknown protein (TAIR:AT4G38092.1); Has 75 Blast hits to 64 proteins in 20 species: Archae - 0; Bacteria - 0; Metazoa - 36; Fungi - 0; Plants - 22; Viruses - 0; Other Eukaryotes - 17 (sour /.../BI BLink). [Source:TAIR;Acc:AT3G04490]
A3SS	AT1G77810	1	-	29262209	29262410	29262209	29262379	29262481	29262540	0.000515328	0.0412798	0.056,0.294,0.128	0.047,0.0,0.056	0.125	B3GALT7	Beta-1,3-galactosyltransferase 7 [Source:UniProtKB/Swiss-Prot;Acc:Q6NQB7]
A3SS	AT1G45150	1	-	17080319	17080689	17080319	17080517	17080771	17080877	0.000519793	0.0412882	0.875,0.841,1.0	0.967,1.0,0.978	-0.076		unknown protein; Has 219 Blast hits to 202 proteins in 78 species: Archae - 0; Bacteria - 166; Metazoa - 0; Fungi - 0; Plants - 36; Viruses - 0; Other Eukaryotes - 17 (source: NCBI BLink). [Source:TAIR;Acc:AT1G45150]
A3SS	AT1G08210	1	-	2578314	2578452	2578314	2578397	2578864	2579092	0.000520374	0.0412882	1.0,1.0,0.911	0.738,0.821,1.0	0.117		Eukaryotic aspartyl protease family protein [Source:TAIR;Acc:AT1G08210]
A3SS	AT2G17580	2	+	7647426	7647611	7647434	7647611	7647250	7647334	0.000523982	0.0412919	0.97,0.945,1.0	1.0,0.805,0.765	0.115		Polynucleotide adenylyltransferase family protein [Source:TAIR;Acc:AT2G17580]
A3SS	AT1G51805	1	-	19223471	19223570	19223471	19223564	19223705	19224184	0.000525123	0.0412919	0.492,0.744,0.659	1.0,0.659,1.0	-0.255		Leucine-rich repeat protein kinase family protein [Source:TAIR;Acc:AT1G51805]
A3SS	AT5G41690	5	-	16670672	16670790	16670672	16670764	16670870	16670938	0.000524059	0.0412919	0.794,0.682,0.631	1.0,1.0,0.885	-0.259		RNA-binding (RRM/RBD/RNP motifs) family protein [Source:TAIR;Acc:AT5G41690]
A3SS	AT4G00060	4	+	28353	28574	28398	28574	28110	28281	0.000528679	0.0414478	0.822,0.563,0.809	0.822,1.0,1.0	-0.209	MEE44	Nucleotidyltransferase family protein [Source:TAIR;Acc:AT4G00060]
A3SS	AT5G05740	5	-	1724670	1724879	1724670	1724872	1724966	1725120	0.000533945	0.0417364	0.032,0.049,0.011	0.073,0.093,0.093	-0.056	EGY2	Probable zinc metalloprotease EGY2, chloroplastic [Source:UniProtKB/Swiss-Prot;Acc:Q9FFK3]
A3SS	AT4G31480	4	+	15263655	15263833	15263829	15263833	15263153	15263338	0.00054105	0.0421667	0.773,0.702,1.0	1.0,0.893,1.0	-0.139		Coatomer subunit beta-1 [Source:UniProtKB/Swiss-Prot;Acc:Q9SV21]
A3SS	AT1G16560	1	+	5668918	5669039	5668944	5669039	5668572	5668739	0.000544336	0.0422976	0.936,1.0,0.956	0.798,0.9,0.816	0.126		Per1-like family protein [Source:TAIR;Acc:AT1G16560]
A3SS	AT3G12140	3	-	3870877	3871015	3870877	3871009	3871433	3871728	0.00055373	0.0427588	0.924,0.931,0.762	0.964,1.0,0.906	-0.084	EML1	Protein EMSY-LIKE 1 [Source:UniProtKB/Swiss-Prot;Acc:Q9C7C4]
A3SS	AT5G22640	5	+	7531820	7531896	7531876	7531896	7531650	7531717	0.00056199	0.0431601	0.709,0.905,1.0	0.693,0.523,0.604	0.265	TIC100	Protein TIC 100 [Source:UniProtKB/Swiss-Prot;Acc:Q8LPR8]
A3SS	AT4G22540	4	-	11863166	11863282	11863166	11863232	11863760	11864126	0.00056857	0.0435385	0.429,1.0,1.0	1.0,0.53,0.334	0.188	ORP2A	Oxysterol-binding protein-related protein 2A [Source:UniProtKB/Swiss-Prot;Acc:Q940Y1]
A3SS	AT1G07570	1	-	2333167	2333395	2333167	2333262	2333504	2333738	0.000571752	0.0436553	0.726,0.577,0.393	1.0,0.633,1.0	-0.312	APK1A	Protein kinase APK1A, chloroplastic [Source:UniProtKB/Swiss-Prot;Acc:Q06548]
A3SS	AT5G11870	5	+	3826867	3826999	3826877	3826999	3826652	3826774	0.000578317	0.044029	0.0,0.0,0.0	0.361,0.0,0.739	-0.367		Alkaline phytoceramidase (aPHC) [Source:TAIR;Acc:AT5G11870]
A3SS	AT2G33585	2	-	14223545	14223637	14223545	14223617	14223711	14224167	0.000584233	0.0442237	0.015,0.0,0.0	0.06,0.037,0.085	-0.056		unknown protein; Has 31 Blast hits to 31 proteins in 12 species: Archae - 0; Bacteria - 0; Metazoa - 0; Fungi - 0; Plants - 31; Viruses - 0; Other Eukaryotes - 0 (source: NCBI BLink). [Source:TAIR;Acc:AT2G33585]
A3SS	AT3G16170	3	+	5478941	5479019	5478987	5479019	5478728	5478821	0.000603323	0.0454078	1.0,0.987,0.985	0.954,0.924,0.914	0.06	AAE13	Malonate--CoA ligase [Source:UniProtKB/Swiss-Prot;Acc:Q8H151]
A3SS	AT3G27940	3	+	10373610	10373713	10373662	10373713	10373250	10373396	0.000614291	0.0459706	0.0,1.0,0.788	0.0,0.0,1.0	0.263	LBD26	LOB domain-containing protein 26 [Source:UniProtKB/Swiss-Prot;Acc:Q9LIJ0]
A3SS	AT1G80810	1	+	30367601	30367669	30367604	30367669	30367406	30367508	0.000636509	0.0474984	1.0,1.0,1.0	0.952,0.867,0.888	0.098		Tudor/PWWP/MBT superfamily protein [Source:TAIR;Acc:AT1G80810]
A3SS	AT3G03100	3	-	705821	705931	705821	705927	706206	706302	0.000647628	0.0481916	0.45,0.797,1.0	1.0,1.0,1.0	-0.251		Probable NADH dehydrogenase [ubiquinone] 1 alpha subcomplex subunit 12 [Source:UniProtKB/Swiss-Prot;Acc:Q9M9M9]
A3SS	AT3G61990	3	-	22957608	22957794	22957608	22957782	22957899	22957967	0.000655156	0.0486144	1.0,1.0,1.0	1.0,0.7,0.858	0.147	OMTF3	S-adenosyl-L-methionine-dependent methyltransferases superfamily protein [Source:TAIR;Acc:AT3G61990]
A3SS	AT3G59340	3	-	21931145	21931259	21931145	21931203	21931486	21931570	0.000664843	0.0491946	0.767,0.745,0.493	1.0,0.687,1.0	-0.227		Eukaryotic protein of unknown function (DUF914) [Source:TAIR;Acc:AT3G59340]
A3SS	AT5G60170	5	+	24229688	24229836	24229705	24229836	24229463	24229555	0.000670845	0.0492988	0.311,0.291,0.192	0.074,0.119,0.094	0.169		RNA binding (RRM/RBD/RNP motifs) family protein [Source:TAIR;Acc:AT5G60170]
A3SS	AT5G08710	5	-	2835431	2835486	2835431	2835483	2835690	2835793	0.000679351	0.0492988	1.0,1.0,0.954	0.972,0.902,0.831	0.083		Regulator of chromosome condensation (RCC1) family protein [Source:TAIR;Acc:AT5G08710]
A3SS	AT5G61190	5	+	24617693	24617852	24617699	24617852	24617410	24617613	0.000675122	0.0492988	1.0,1.0,1.0	0.936,0.825,1.0	0.08		putative endonuclease or glycosyl hydrolase with C2H2-type zinc finger domain [Source:TAIR;Acc:AT5G61190]
A3SS	AT4G27630	4	-	13794874	13794989	13794874	13794953	13795250	13795455	0.000677017	0.0492988	0.0,0.031,0.0	0.109,0.0,0.15	-0.076	GTG2	GPCR-type G protein 2 [Source:UniProtKB/Swiss-Prot;Acc:Q0WQG8]
A3SS	AT1G14970	1	-	5163945	5164140	5163945	5164138	5164277	5164347	0.000700934	0.050325	0.0,1.0,0.0	0.665,1.0,0.498	-0.388		O-fucosyltransferase family protein [Source:TAIR;Acc:AT1G14970]
A3SS	AT5G24140	5	-	8164787	8165066	8164787	8165002	8165231	8165519	0.000698667	0.050325	1.0,1.0,1.0	1.0,0.901,0.94	0.053	SQE4	Squalene epoxidase 4 [Source:UniProtKB/Swiss-Prot;Acc:O65403]
A3SS	AT1G65950	1	-	24550056	24550162	24550056	24550150	24550238	24550305	0.000707783	0.0506642	0.411,0.125,0.0	0.0,0.028,0.145	0.121		Protein kinase superfamily protein [Source:TAIR;Acc:AT1G65950]
A3SS	AT1G55325	1	+	20639492	20639606	20639527	20639606	20639341	20639396	0.000715128	0.0509132	0.213,0.0,1.0	1.0,0.0,1.0	-0.262	MED13	Mediator of RNA polymerase II transcription subunit 13 [Source:UniProtKB/Swiss-Prot;Acc:F4I096]
A3SS	AT1G07570	1	-	2333167	2333281	2333167	2333262	2333504	2333738	0.000724744	0.0514588	0.921,0.836,0.814	1.0,0.897,1.0	-0.109	APK1A	Protein kinase APK1A, chloroplastic [Source:UniProtKB/Swiss-Prot;Acc:Q06548]
A3SS	AT3G11720	3	-	3707789	3707915	3707789	3707898	3707984	3708115	0.000729553	0.051661	0.059,0.0,0.0	0.016,0.07,0.148	-0.058		Polyketide cyclase/dehydrase and lipid transport superfamily protein [Source:TAIR;Acc:AT3G11720]
A3SS	AT2G16940	2	-	7344965	7345091	7344965	7345079	7345399	7345455	0.000731531	0.0516621	0.411,0.302,0.397	0.168,0.176,0.212	0.185		Splicing factor, CC1-like [Source:TAIR;Acc:AT2G16940]
A3SS	AT2G28470	2	-	12172981	12173172	12172981	12173167	12173258	12173298	0.000733881	0.0516895	0.327,0.196,0.394	0.728,0.694,1.0	-0.502	BGAL8	Beta-galactosidase 8 [Source:UniProtKB/Swiss-Prot;Acc:Q9SCV4]
A3SS	AT2G32700	2	+	13867192	13867438	13867214	13867438	13866771	13866926	0.000742433	0.0520138	1.0,0.637,1.0	0.754,0.305,1.0	0.193	LUH	LEUNIG_homolog [Source:TAIR;Acc:AT2G32700]
A3SS	AT2G44420	2	+	18330806	18330889	18330845	18330889	18330472	18330636	0.000750181	0.0524171	0.15,0.032,0.058	0.0,0.0,0.0	0.08		protein N-terminal asparagine amidohydrolase family protein [Source:TAIR;Acc:AT2G44420]
A3SS	AT5G26180	5	+	9152108	9152270	9152116	9152270	9151833	9151914	0.000758988	0.0526138	1.0,1.0,1.0	0.878,0.903,0.968	0.084		S-adenosyl-L-methionine-dependent methyltransferases superfamily protein [Source:TAIR;Acc:AT5G26180]
A3SS	AT3G02680	3	+	577369	577508	577377	577508	577205	577297	0.000758844	0.0526138	0.0,0.0,0.068	0.0,0.128,0.29	-0.117	NBS1	Nijmegen breakage syndrome 1 protein [Source:UniProtKB/Swiss-Prot;Acc:Q0H8D7]
A3SS	AT1G61150	1	+	22542816	22542981	22542836	22542981	22542523	22542673	0.000761079	0.0526203	0.031,0.037,0.058	0.131,0.153,0.092	-0.083		LisH and RanBPM domains containing protein [Source:TAIR;Acc:AT1G61150]
A3SS	AT5G08430	5	+	2717750	2717851	2717791	2717851	2716699	2717592	0.000780587	0.0535474	0.977,0.971,0.947	0.8,0.958,0.901	0.079		Uncharacterized protein At5g08430 [Source:UniProtKB/Swiss-Prot;Acc:Q9FT92]
A3SS	AT3G60810	3	+	22470935	22471059	22470950	22471059	22470814	22470856	0.000793042	0.05412	1.0,1.0,0.578	1.0,1.0,1.0	-0.141		unknown protein; CONTAINS InterPro DOMAIN/s: Protein of unknown function DUF1499 (InterPro:IPR010865); Has 444 Blast hits to 444 proteins in 143 species: Archae - 0; Bacteria - 268; Metazoa - 0; Fungi - 0; Plants - 51; Viruses - 0; Other Eukaryotes /.../(source: NCBI BLink). [Source:TAIR;Acc:AT3G60810]
A3SS	AT1G66750	1	+	24896327	24896453	24896347	24896453	24895336	24895445	0.000799624	0.0542879	1.0,1.0,1.0	0.865,1.0,0.857	0.093	CDKD-2	Cyclin-dependent kinase D-2 [Source:UniProtKB/Swiss-Prot;Acc:Q9C9M7]
A3SS	AT3G60810	3	+	22470927	22471059	22470950	22471059	22470814	22470856	0.000798705	0.0542879	1.0,1.0,0.55	1.0,1.0,1.0	-0.15		unknown protein; CONTAINS InterPro DOMAIN/s: Protein of unknown function DUF1499 (InterPro:IPR010865); Has 444 Blast hits to 444 proteins in 143 species: Archae - 0; Bacteria - 268; Metazoa - 0; Fungi - 0; Plants - 51; Viruses - 0; Other Eukaryotes /.../(source: NCBI BLink). [Source:TAIR;Acc:AT3G60810]
A3SS	AT2G05755	2	+	2171780	2171955	2171785	2171955	2171312	2171466	0.000839516	0.0564146	0.904,1.0,0.745	1.0,1.0,0.971	-0.107		Nodulin MtN21 /EamA-like transporter family protein [Source:TAIR;Acc:AT2G05755]
A3SS	AT4G12790	4	-	7518847	7518924	7518847	7518913	7519325	7519422	0.00086008	0.0576495	1.0,0.957,1.0	0.584,1.0,1.0	0.124		P-loop containing nucleoside triphosphate hydrolases superfamily protein [Source:TAIR;Acc:AT4G12790]
A3SS	AT2G39250	2	-	16389601	16389680	16389601	16389677	16389826	16389954	0.000876226	0.0579938	0.497,0.264,0.888	0.152,0.124,0.11	0.421	SNZ	AP2-like ethylene-responsive transcription factor SNZ [Source:UniProtKB/Swiss-Prot;Acc:Q6PV67]
A3SS	AT3G58180	3	+	21545947	21546180	21545948	21546180	21545746	21545865	0.00087436	0.0579938	0.073,0.122,0.125	0.086,0.0,0.055	0.06		Deoxyhypusine hydroxylase [Source:UniProtKB/Swiss-Prot;Acc:Q94JW0]
A3SS	AT2G40690	2	+	16974856	16975058	16974861	16975058	16974668	16974774	0.000882382	0.0582549	1.0,1.0,1.0	0.902,0.872,0.924	0.101	GLY1	Glycerol-3-phosphate dehydrogenase [NAD(+)] 2, chloroplastic [Source:UniProtKB/Swiss-Prot;Acc:Q949Q0]
A3SS	AT2G27900	2	+	11883356	11883497	11883376	11883497	11882991	11883176	0.000888308	0.0584995	1.0,1.0,1.0	0.47,1.0,0.727	0.268		CONTAINS InterPro DOMAIN/s: Protein of unknown function DUF2451, C-terminal (InterPro:IPR019514), Vacuolar protein sorting-associated protein 54 (InterPro:IPR019515); Has 316 Blast hits to 252 proteins in 92 species: Archae - 0; Bacteria - 2; Metazo /.../0; Fungi - 2; Plants - 68; Viruses - 0; Other Eukaryotes - 44 (source: NCBI BLink). [Source:TAIR;Acc:AT2G27900]
A3SS	AT2G30170	2	-	12881020	12881116	12881020	12881100	12881210	12881262	0.000893161	0.0586724	0.126,0.162,0.132	0.271,0.208,0.275	-0.111		Probable protein phosphatase 2C 26 [Source:UniProtKB/Swiss-Prot;Acc:O64730]
A3SS	AT1G64230	1	+	23833772	23833861	23833773	23833861	23833550	23833671	0.0009004	0.0589006	0.957,0.934,0.706	0.571,0.6,0.688	0.246	UBC28	Ubiquitin-conjugating enzyme E2 28 [Source:UniProtKB/Swiss-Prot;Acc:Q94F47]
A3SS	AT1G17940	1	-	6169988	6170143	6169988	6170103	6170413	6170503	0.000901106	0.0589006	0.966,0.873,1.0	0.768,0.875,0.83	0.122		Endosomal targeting BRO1-like domain-containing protein [Source:TAIR;Acc:AT1G17940]
A3SS	AT1G07290	1	-	2243744	2243873	2243744	2243859	2243967	2244160	0.000906081	0.0590792	1.0,0.0,1.0	0.479,0.479,0.479	0.188	GONST2	GDP-mannose transporter GONST2 [Source:UniProtKB/Swiss-Prot;Acc:Q84L09]
A3SS	AT1G32230	1	+	11614982	11615161	11614990	11615161	11614658	11614906	0.000916948	0.0592658	0.401,0.905,0.935	0.383,0.314,0.417	0.376	RCD1	Inactive poly [ADP-ribose] polymerase RCD1 [Source:UniProtKB/Swiss-Prot;Acc:Q8RY59]
A3SS	AT3G18500	3	+	6354696	6354808	6354699	6354808	6354498	6354605	0.00091557	0.0592658	0.856,1.0,0.712	1.0,1.0,1.0	-0.144	CCR4-3	Carbon catabolite repressor protein 4 homolog 3 [Source:UniProtKB/Swiss-Prot;Acc:Q9LS39]
A3SS	AT4G11670	4	-	7049440	7049671	7049440	7049658	7050105	7050207	0.000917943	0.0592658	0.683,0.854,0.81	1.0,0.928,0.866	-0.149		Protein of unknown function (DUF810) [Source:TAIR;Acc:AT4G11670]
A3SS	AT1G10900	1	-	3636462	3636505	3636462	3636476	3637022	3637141	0.000928446	0.059362	1.0,1.0,0.946	0.933,0.879,0.91	0.075	PIP5K7	Phosphatidylinositol 4-phosphate 5-kinase 7 [Source:UniProtKB/Swiss-Prot;Acc:Q9SUI2]
A3SS	AT5G64040	5	-	25628587	25628812	25628587	25628794	25628905	25629031	0.000924797	0.059362	1.0,1.0,1.0	0.455,1.0,1.0	0.182	PSAN	Photosystem I reaction center subunit N, chloroplastic [Source:UniProtKB/Swiss-Prot;Acc:P49107]
A3SS	AT5G48880	5	-	19816922	19817204	19816922	19817121	19817772	19817897	0.000939907	0.0598332	1.0,1.0,1.0	0.639,1.0,1.0	0.12	KAT5	3-ketoacyl-CoA thiolase 5, peroxisomal [Source:UniProtKB/Swiss-Prot;Acc:Q570C8]
A3SS	AT4G16420	4	-	9264250	9264299	9264250	9264296	9264388	9264464	0.00094036	0.0598332	0.724,0.582,0.63	0.479,0.463,0.518	0.159	ADA2B	Transcriptional adapter ADA2b [Source:UniProtKB/Swiss-Prot;Acc:Q9ATB4]
A3SS	AT1G67720	1	+	25390008	25390205	25390018	25390205	25389868	25389934	0.000956734	0.06052	0.073,0.0,0.0	0.1,0.0,0.258	-0.095		Probable LRR receptor-like serine/threonine-protein kinase At1g67720 [Source:UniProtKB/Swiss-Prot;Acc:C0LGI2]
A3SS	AT5G22640	5	+	7531876	7532095	7531987	7532095	7531650	7531717	0.000953718	0.06052	0.109,0.197,0.097	0.217,0.223,0.2	-0.079	TIC100	Protein TIC 100 [Source:UniProtKB/Swiss-Prot;Acc:Q8LPR8]
A3SS	AT4G14920	4	-	8533299	8533461	8533299	8533417	8533697	8535842	0.000958045	0.06052	0.048,0.059,0.095	0.153,0.105,0.261	-0.106		Acyl-CoA N-acyltransferase with RING/FYVE/PHD-type zinc finger protein [Source:TAIR;Acc:AT4G14920]
A3SS	AT3G62910	3	-	23258960	23259055	23258960	23259026	23259232	23259286	0.000968509	0.0610346	0.0,0.174,0.359	0.071,0.025,0.0	0.146	APG3	Peptide chain release factor APG3, chloroplastic [Source:UniProtKB/Swiss-Prot;Acc:Q8RX79]
A3SS	AT2G28250	2	+	12043833	12044073	12043927	12044073	12043481	12043516	0.000991794	0.0618514	0.053,0.133,0.031	0.152,0.144,0.381	-0.153	NCRK	Receptor-like serine/threonine-protein kinase NCRK [Source:UniProtKB/Swiss-Prot;Acc:Q8VYY5]
A3SS	AT2G22190	2	-	9435119	9435187	9435119	9435176	9435288	9435381	0.000996147	0.061888	0.0,0.0,0.0	0.086,0.0,0.26	-0.115	TPPE	Probable trehalose-phosphate phosphatase E [Source:UniProtKB/Swiss-Prot;Acc:Q67X99]
A3SS	AT3G24100	3	+	8703748	8703867	8703758	8703867	8703285	8703379	0.00104096	0.0645202	1.0,1.0,1.0	0.739,1.0,0.557	0.235		Uncharacterised protein family SERF [Source:TAIR;Acc:AT3G24100]
A3SS	AT5G02830	5	-	645927	645998	645927	645993	646187	646781	0.00105546	0.0648227	0.073,0.043,0.048	0.161,0.119,0.067	-0.061		Pentatricopeptide repeat-containing protein At5g02830, chloroplastic [Source:UniProtKB/Swiss-Prot;Acc:Q8GYL7]
A3SS	AT5G48530	5	-	19667883	19667992	19667883	19667989	19668099	19668130	0.00105569	0.0648227	0.974,1.0,1.0	0.984,0.91,0.859	0.074		unknown protein; FUNCTIONS IN: molecular_function unknown; INVOLVED IN: biological_process unknown; LOCATED IN: mitochondrion; BEST Arabidopsis thaliana protein match is: unknown protein (TAIR:AT3G07440.1); Has 32 Blast hits to 32 proteins in 11 spe /.../Archae - 0; Bacteria - 0; Metazoa - 0; Fungi - 0; Plants - 32; Viruses - 0; Other Eukaryotes - 0 (source: NCBI BLink). [Source:TAIR;Acc:AT5G4853…
A3SS	AT4G01800	4	-	772932	772959	772932	772956	773193	773369	0.00105508	0.0648227	0.831,0.798,0.612	0.664,1.0,1.0	-0.141	SECA1	Protein translocase subunit SECA1, chloroplastic [Source:UniProtKB/Swiss-Prot;Acc:Q9SYI0]
A3SS	AT3G24560	3	+	8964635	8964812	8964655	8964812	8964401	8964555	0.00105976	0.0649216	1.0,1.0,1.0	1.0,0.876,0.542	0.194	RSY3	Adenine nucleotide alpha hydrolases-like superfamily protein [Source:TAIR;Acc:AT3G24560]
A3SS	AT1G73470	1	+	27626425	27626571	27626431	27626571	27626192	27626324	0.00107041	0.0654219	1.0,1.0,0.829	1.0,0.492,0.772	0.188		unknown protein; FUNCTIONS IN: molecular_function unknown; INVOLVED IN: biological_process unknown; LOCATED IN: chloroplast; EXPRESSED IN: 22 plant structures; EXPRESSED DURING: 13 growth stages; Has 72 Blast hits to 72 proteins in 35 species: Archa /.../ Bacteria - 50; Metazoa - 0; Fungi - 0; Plants - 22; Viruses - 0; Other Eukaryotes - 0 (source: NCBI BLink). [Source:TAIR;Acc:AT1G73470]
A3SS	AT4G30310	4	+	14832315	14832469	14832351	14832469	14832193	14832273	0.0010793	0.0656606	0.028,0.023,0.072	0.085,0.106,0.094	-0.054		FGGY family of carbohydrate kinase [Source:TAIR;Acc:AT4G30310]
A3SS	AT3G60070	3	-	22185786	22186001	22185786	22185995	22186200	22186329	0.00109519	0.0663204	1.0,1.0,0.948	0.689,0.946,1.0	0.104		Major facilitator superfamily protein [Source:TAIR;Acc:AT3G60070]
A3SS	AT4G04614	4	-	2327760	2327924	2327760	2327922	2328180	2328264	0.0011342	0.0683689	1.0,0.783,1.0	1.0,1.0,1.0	-0.072		unknown protein; Has 35333 Blast hits to 34131 proteins in 2444 species: Archae - 798; Bacteria - 22429; Metazoa - 974; Fungi - 991; Plants - 531; Viruses - 0; Other Eukaryotes - 9610 (source: NCBI BLink). [Source:TAIR;Acc:AT4G04614]
A3SS	AT1G02140	1	-	403770	403945	403770	403937	404185	404456	0.00114327	0.068758	1.0,1.0,0.596	1.0,1.0,1.0	-0.135	MEE63	Protein mago nashi homolog [Source:UniProtKB/Swiss-Prot;Acc:O23676]
A3SS	AT1G61810	1	+	22832209	22832294	22832225	22832294	22831833	22832092	0.00116425	0.0697015	0.732,1.0,0.645	1.0,0.405,0.0	0.324	BGLU45	Beta-glucosidase 45 [Source:UniProtKB/Swiss-Prot;Acc:O80689]
A3SS	AT3G01390	3	-	150834	151162	150834	150954	151476	151539	0.00116356	0.0697015	0.6,0.391,0.6	1.0,0.6,0.6	-0.203	VHA-G1	V-type proton ATPase subunit G1 [Source:UniProtKB/Swiss-Prot;Acc:O82628]
A3SS	AT4G09020	4	+	5785661	5785766	5785710	5785766	5785351	5785456	0.00117723	0.0703185	1.0,1.0,1.0	1.0,0.752,1.0	0.083	ISA3	Isoamylase 3, chloroplastic [Source:UniProtKB/Swiss-Prot;Acc:Q9M0S5]
A3SS	AT3G60510	3	-	22358205	22358410	22358205	22358286	22358496	22358581	0.00120315	0.0716717	0.042,0.022,0.0	0.126,0.055,0.05	-0.056		3-hydroxyisobutyryl-CoA hydrolase-like protein 1, mitochondrial [Source:UniProtKB/Swiss-Prot;Acc:Q5XF59]
A3SS	AT5G48330	5	+	19586555	19586775	19586558	19586775	19585935	19586353	0.00120532	0.0716717	0.447,0.124,0.347	0.027,0.071,0.188	0.211		Regulator of chromosome condensation (RCC1) family protein [Source:TAIR;Acc:AT5G48330]
A3SS	AT3G18660	3	-	6421557	6421797	6421557	6421794	6421882	6422002	0.00122291	0.0723018	0.0,0.124,0.0	0.188,0.116,0.132	-0.104	GUX1	UDP-glucuronate:xylan alpha-glucuronosyltransferase 1 [Source:UniProtKB/Swiss-Prot;Acc:Q9LSB1]
A3SS	AT5G08185	5	-	2634771	2634875	2634771	2634872	2634973	2635105	0.0012241	0.0723018	0.597,0.497,0.856	0.357,0.31,0.175	0.369	MIR162A	microRNA162A [Source:TAIR;Acc:AT5G08185]
A3SS	AT2G30460	2	-	12976680	12976953	12976680	12976916	12977764	12977832	0.0012269	0.0723018	1.0,1.0,1.0	1.0,0.644,1.0	0.119		Nucleotide/sugar transporter family protein [Source:TAIR;Acc:AT2G30460]
A3SS	AT4G17150	4	+	9639329	9639428	9639333	9639428	9639128	9639255	0.00122659	0.0723018	0.329,0.116,0.215	0.123,0.043,0.08	0.138		alpha/beta-Hydrolases superfamily protein [Source:TAIR;Acc:AT4G17150]
A3SS	AT5G16750	5	-	5506369	5506526	5506369	5506485	5506978	5507097	0.00125529	0.07381	0.977,0.964,1.0	0.903,0.944,0.885	0.07	TOZ	Transducin family protein / WD-40 repeat family protein [Source:TAIR;Acc:AT5G16750]
A3SS	AT3G02600	3	+	551663	551718	551683	551718	551350	551584	0.00130981	0.0763842	1.0,0.861,1.0	0.151,1.0,0.0	0.57	LPP3	Putative lipid phosphate phosphatase 3, chloroplastic [Source:UniProtKB/Swiss-Prot;Acc:Q8LFD1]
A3SS	AT5G67170	5	+	26800033	26800131	26800072	26800131	26799765	26799901	0.00131067	0.0763842	0.482,1.0,0.761	1.0,0.814,1.0	-0.19		SEC-C motif-containing protein / OTU-like cysteine protease family protein [Source:TAIR;Acc:AT5G67170]
A3SS	AT2G27460	2	+	11742844	11742960	11742863	11742960	11742670	11742752	0.00131013	0.0763842	1.0,1.0,1.0	0.925,0.937,0.971	0.056		sec23/sec24 transport family protein [Source:TAIR;Acc:AT2G27460]
A3SS	AT5G09900	5	-	3092144	3092339	3092144	3092335	3092427	3092595	0.00132077	0.0768031	0.71,0.761,0.62	0.831,1.0,0.855	-0.198	RPN5A	26S proteasome non-ATPase regulatory subunit 12 homolog A [Source:UniProtKB/Swiss-Prot;Acc:Q9FIB6]
A3SS	AT1G76140	1	+	28571723	28571938	28571725	28571938	28571129	28571488	0.00132512	0.0768864	1.0,1.0,1.0	1.0,0.589,1.0	0.137		Prolyl oligopeptidase family protein [Source:TAIR;Acc:AT1G76140]
A3SS	AT5G15440	5	+	5012302	5012390	5012316	5012390	5012060	5012191	0.00135353	0.0780998	1.0,0.0,1.0	0.479,0.754,0.479	0.096	EDL1	EID1-like F-box protein 1 [Source:UniProtKB/Swiss-Prot;Acc:Q9LF38]
A3SS	AT2G03810	2	+	1161661	1161724	1161669	1161724	1161028	1161296	0.00135493	0.0780998	0.0,0.0,0.096	0.214,0.16,0.264	-0.181		18S pre-ribosomal assembly protein gar2-related [Source:TAIR;Acc:AT2G03810]
A3SS	AT4G02560	4	-	1126392	1126522	1126392	1126509	1126619	1126713	0.00136387	0.0783908	1.0,0.97,1.0	0.828,0.923,0.951	0.089	LD	Homeobox protein LUMINIDEPENDENS [Source:UniProtKB/Swiss-Prot;Acc:Q38796]
A3SS	AT5G65060	5	+	25990083	25990183	25990121	25990183	25989941	25990003	0.00136621	0.0783908	0.506,0.4,0.368	0.243,0.189,0.293	0.183	MAF3	K-box region and MADS-box transcription factor family protein [Source:TAIR;Acc:AT5G65060]
A3SS	AT1G60260	1	-	22220205	22220446	22220205	22220415	22220547	22220707	0.00136891	0.0783908	1.0,0.806,1.0	0.294,0.625,0.769	0.373	BGLU5	beta glucosidase 5 [Source:TAIR;Acc:AT1G60260]
A3SS	AT1G01760	1	-	276265	276317	276265	276307	276404	276519	0.00137582	0.0785211	0.136,0.623,0.767	0.895,0.825,0.904	-0.366		adenosine deaminases;RNA binding;RNA binding;adenosine deaminases [Source:TAIR;Acc:AT1G01760]
A3SS	AT3G55080	3	-	20414553	20414664	20414553	20414651	20414768	20414832	0.00138621	0.0788671	0.919,0.859,0.856	0.742,0.599,0.806	0.162		SET domain-containing protein [Source:TAIR;Acc:AT3G55080]
A3SS	AT1G03830	1	-	965995	966157	965995	966146	966445	966757	0.00139398	0.0791385	1.0,1.0,1.0	1.0,1.0,0.678	0.107		guanylate-binding family protein [Source:TAIR;Acc:AT1G03830]
A3SS	AT5G08130	5	-	2609301	2609406	2609301	2609354	2609534	2610250	0.00140488	0.0795859	0.218,0.358,0.332	0.125,0.038,0.047	0.233	BIM1	Transcription factor BIM1 [Source:UniProtKB/Swiss-Prot;Acc:Q9LEZ3]
A3SS	AT5G14850	5	-	4802299	4802469	4802299	4802464	4802545	4802697	0.001414	0.0798164	1.0,0.97,1.0	0.943,1.0,0.764	0.088		Alg9-like mannosyltransferase family [Source:TAIR;Acc:AT5G14850]
A3SS	AT1G64050	1	+	23763691	23763878	23763862	23763878	23763439	23763565	0.00141501	0.0798164	0.6,0.0,0.0	0.333,0.636,0.6	-0.323		unknown protein; Has 524 Blast hits to 342 proteins in 101 species: Archae - 0; Bacteria - 106; Metazoa - 106; Fungi - 24; Plants - 25; Viruses - 0; Other Eukaryotes - 263 (source: NCBI BLink). [Source:TAIR;Acc:AT1G64050]
A3SS	AT2G16940	2	-	7344965	7345124	7344965	7345079	7345399	7345455	0.00142988	0.0804826	0.621,0.524,0.651	0.401,0.415,0.478	0.167		Splicing factor, CC1-like [Source:TAIR;Acc:AT2G16940]
A3SS	AT1G72390	1	+	27245413	27245568	27245420	27245568	27245164	27245326	0.00144214	0.0809998	1.0,0.49,0.0	0.658,1.0,1.0	-0.389		CONTAINS InterPro DOMAIN/s: Spt20 family (InterPro:IPR021950); Has 8778 Blast hits to 7244 proteins in 477 species: Archae - 6; Bacteria - 326; Metazoa - 4198; Fungi - 1506; Plants - 923; Viruses - 22; Other Eukaryotes - 1797 (source: NCBI BLink). [Source:TAIR;Acc:AT1G72390]
A3SS	AT3G45100	3	+	16505973	16506085	16506004	16506085	16505753	16505895	0.00145203	0.0813436	0.821,0.769,0.4	0.714,0.854,1.0	-0.193	SETH2	UDP-Glycosyltransferase superfamily protein [Source:TAIR;Acc:AT3G45100]
A3SS	AT5G35200	5	-	13465497	13465627	13465497	13465595	13465869	13466051	0.0014703	0.0820565	1.0,1.0,0.695	1.0,1.0,0.948	-0.084		Putative clathrin assembly protein At5g35200 [Source:UniProtKB/Swiss-Prot;Acc:Q9LHS0]
A3SS	AT2G44650	2	-	18419941	18420170	18419941	18420007	18420265	18420324	0.00147799	0.0823115	0.636,1.0,0.846	0.529,0.6,0.286	0.356	CHL-CPN10	chloroplast chaperonin 10 [Source:TAIR;Acc:AT2G44650]
A3SS	AT5G52270	5	-	21221864	21221935	21221864	21221926	21222019	21222327	0.00148964	0.0827505	0.655,1.0,0.0	0.0,1.0,0.0	0.218		SNARE-like superfamily protein [Source:TAIR;Acc:AT5G52270]
A3SS	AT1G45231	1	-	17149978	17150100	17149978	17150097	17150211	17150628	0.0014953	0.0827505	0.831,0.759,0.94	0.952,0.932,1.0	-0.118		S-adenosyl-L-methionine-dependent methyltransferases superfamily protein [Source:TAIR;Acc:AT1G45231]
A3SS	AT1G28100	1	+	9801946	9802184	9802103	9802184	9801081	9801400	0.00151009	0.0832191	1.0,0.686,1.0	1.0,0.95,1.0	-0.088		unknown protein; Has 64 Blast hits to 64 proteins in 27 species: Archae - 0; Bacteria - 14; Metazoa - 0; Fungi - 6; Plants - 42; Viruses - 0; Other Eukaryotes - 2 (source: NCBI BLink). [Source:TAIR;Acc:AT1G28100]
A3SS	AT3G47630	3	-	17564321	17564424	17564321	17564414	17564579	17564648	0.00151383	0.0832509	0.0,0.0,0.105	0.065,0.105,0.143	-0.069		FUNCTIONS IN: molecular_function unknown; INVOLVED IN: biological_process unknown; LOCATED IN: endomembrane system; EXPRESSED IN: 21 plant structures; EXPRESSED DURING: 13 growth stages; CONTAINS InterPro DOMAIN/s: Mitochondrial matrix Mmp37 (InterP /.../015222); Has 325 Blast hits to 325 proteins in 172 species: Archae - 0; Bacteria - 0; Metazoa - 109; Fungi - 140; Plants - 43; Viruses - 0; Othe…
A3SS	AT1G76280	1	-	28621672	28621796	28621672	28621780	28621954	28622142	0.00152647	0.0835974	0.0,0.0,0.0	0.154,0.132,0.0	-0.095		Pentatricopeptide repeat-containing protein At1g76280 [Source:UniProtKB/Swiss-Prot;Acc:Q9SGQ6]
A3SS	AT4G10340	4	+	6408631	6408696	6408640	6408696	6408515	6408557	0.00153101	0.0836721	1.0,1.0,0.461	1.0,1.0,1.0	-0.18	LHCB5	Chlorophyll a-b binding protein CP26, chloroplastic [Source:UniProtKB/Swiss-Prot;Acc:Q9XF89]
A3SS	AT3G54610	3	+	20216861	20216968	20216874	20216968	20216646	20216765	0.00154477	0.0837417	0.134,0.0,0.134	0.0,0.0,0.0	0.089	HAG1	Histone acetyltransferase GCN5 [Source:UniProtKB/Swiss-Prot;Acc:Q9AR19]
A3SS	AT1G17990	1	-	6192828	6192990	6192828	6192985	6193091	6193222	0.00154344	0.0837417	0.964,0.537,0.907	1.0,0.982,0.954	-0.176		Putative 12-oxophytodienoate reductase-like protein 2A [Source:UniProtKB/Swiss-Prot;Acc:P0DI08]
A3SS	AT1G03190	1	+	777150	777237	777154	777237	776481	776762	0.00154818	0.0837417	0.118,0.197,0.103	0.62,0.236,0.44	-0.293	UVH6	DNA repair helicase UVH6 [Source:UniProtKB/Swiss-Prot;Acc:Q8W4M7]
A3SS	AT3G19520	3	+	6772934	6773094	6772972	6773094	6772686	6772853	0.00155312	0.083761	1.0,1.0,1.0	0.928,0.839,0.945	0.096		UPF0725 protein At3g19520 [Source:UniProtKB/Swiss-Prot;Acc:Q9LH42]
A3SS	AT3G54010	3	+	20003808	20003926	20003877	20003926	20003649	20003709	0.00156939	0.0841972	1.0,1.0,1.0	0.892,0.805,0.828	0.158	PAS1	Peptidyl-prolyl cis-trans isomerase PASTICCINO1 [Source:UniProtKB/Swiss-Prot;Acc:Q7DMA9]
A3SS	AT1G28710	1	-	10088716	10088776	10088716	10088770	10089287	10089535	0.00157326	0.0842335	0.914,1.0,1.0	0.846,0.629,1.0	0.146		Nucleotide-diphospho-sugar transferase family protein [Source:TAIR;Acc:AT1G28710]
A3SS	AT1G73060	1	+	27480561	27480644	27480587	27480644	27480384	27480487	0.0015898	0.0842626	0.3,0.322,0.339	0.109,0.109,0.0	0.248	LPA3	Protein LOW PSII ACCUMULATION 3, chloroplastic [Source:UniProtKB/Swiss-Prot;Acc:Q8H0W0]
A3SS	AT5G64470	5	+	25776813	25776951	25776820	25776951	25775975	25776579	0.00158929	0.0842626	0.616,0.641,0.937	0.419,0.438,0.527	0.27	TBL12	Protein trichome birefringence-like 12 [Source:UniProtKB/Swiss-Prot;Acc:Q9FGE9]
A3SS	AT1G67300	1	-	25194892	25195052	25194892	25195048	25195190	25195284	0.00158217	0.0842626	0.758,1.0,1.0	1.0,1.0,1.0	-0.081		Probable plastidic glucose transporter 2 [Source:UniProtKB/Swiss-Prot;Acc:Q9FYG3]
A3SS	AT4G11800	4	-	7096923	7096964	7096923	7096958	7097125	7097224	0.00160148	0.0845662	1.0,0.744,0.685	1.0,1.0,1.0	-0.19		Calcineurin-like metallo-phosphoesterase superfamily protein [Source:TAIR;Acc:AT4G11800]
A3SS	AT4G12230	4	+	7285360	7285509	7285462	7285509	7284518	7284716	0.00160823	0.0847278	0.949,0.984,1.0	0.942,0.918,0.896	0.059		alpha/beta-Hydrolases superfamily protein [Source:TAIR;Acc:AT4G12230]
A3SS	AT1G07560	1	+	2330075	2330202	2330079	2330202	2329783	2329992	0.00161148	0.0847298	1.0,1.0,1.0	0.797,0.495,1.0	0.236		Probable LRR receptor-like serine/threonine-protein kinase At1g07560 [Source:UniProtKB/Swiss-Prot;Acc:C0LGD9]
A3SS	AT1G15240	1	+	5246931	5246997	5246940	5246997	5246323	5246468	0.00168404	0.0879566	0.388,1.0,0.322	1.0,1.0,1.0	-0.43		Phox-associated domain;Phox-like;Sorting nexin, C-terminal [Source:TAIR;Acc:AT1G15240]
A3SS	AT5G01770	5	-	301316	301419	301316	301409	301494	301984	0.00168621	0.0879566	0.934,1.0,1.0	0.891,0.88,0.898	0.088	RAPTOR2	Regulatory-associated protein of TOR 2 [Source:UniProtKB/Swiss-Prot;Acc:Q9LZW9]
A3SS	AT5G64860	5	-	25926142	25926219	25926142	25926215	25926520	25926580	0.00169011	0.0879859	0.0,0.023,0.0	0.0,0.085,0.151	-0.071	DPE1	4-alpha-glucanotransferase DPE1, chloroplastic/amyloplastic [Source:UniProtKB/Swiss-Prot;Acc:Q9LV91]
A3SS	AT5G49710	5	+	20196156	20196317	20196163	20196317	20195990	20196081	0.00169845	0.0882457	0.92,0.962,1.0	0.894,0.863,0.942	0.061		unknown protein; BEST Arabidopsis thaliana protein match is: unknown protein (TAIR:AT4G24590.1); Has 35333 Blast hits to 34131 proteins in 2444 species: Archae - 798; Bacteria - 22429; Metazoa - 974; Fungi - 991; Plants - 531; Viruses - 0; Other Euk /.../s - 9610 (source: NCBI BLink). [Source:TAIR;Acc:AT5G49710]
A3SS	AT2G35920	2	+	15075929	15076103	15075957	15076103	15075596	15075847	0.00170186	0.0882488	0.024,0.085,0.06	0.199,0.108,0.108	-0.082		RNA helicase family protein [Source:TAIR;Acc:AT2G35920]
A3SS	AT2G01818	2	-	354647	354774	354647	354722	355361	355522	0.00173197	0.0896338	0.77,0.788,0.635	0.839,1.0,0.891	-0.179		PLATZ transcription factor family protein [Source:TAIR;Acc:AT2G01818]
A3SS	AT1G78690	1	+	29597788	29597929	29597791	29597929	29597607	29597710	0.00173648	0.0896907	0.47,0.455,0.27	0.145,0.198,0.141	0.237		N-acylphosphatidylethanolamine synthase [Source:UniProtKB/Swiss-Prot;Acc:Q9ZV87]
A3SS	AT1G62886	1	+	23294526	23294710	23294545	23294710	23294412	23294447	0.00174863	0.0899656	1.0,0.0,0.472	0.817,0.877,1.0	-0.407		Nucleotide excision repair, TFIIH, subunit TTDA [Source:TAIR;Acc:AT1G62886]
A3SS	AT1G60220	1	+	22210514	22210587	22210526	22210587	22210222	22210411	0.001761	0.0902497	0.823,0.538,1.0	1.0,1.0,1.0	-0.213	ULP1D	Ubiquitin-like-specific protease 1D [Source:UniProtKB/Swiss-Prot;Acc:Q2PS26]
A3SS	AT1G11880	1	-	4008411	4008641	4008411	4008633	4008724	4008899	0.00177586	0.0906585	0.84,0.805,0.87	1.0,1.0,1.0	-0.162		transferases, transferring hexosyl groups [Source:TAIR;Acc:AT1G11880]
A3SS	AT4G32160	4	+	15529945	15530052	15529961	15530052	15529558	15529669	0.00178945	0.0909995	0.0,1.0,0.0	1.0,1.0,1.0	-0.667		Phox (PX) domain-containing protein [Source:TAIR;Acc:AT4G32160]
A3SS	AT5G67370	5	-	26877907	26878083	26877907	26878079	26878178	26878214	0.00181465	0.0919259	0.943,1.0,1.0	1.0,0.71,1.0	0.078		Protein of unknown function (DUF1230) [Source:TAIR;Acc:AT5G67370]
A3SS	AT1G49350	1	+	18266162	18266241	18266171	18266241	18265969	18266084	0.0018139	0.0919259	0.806,0.712,0.637	0.322,0.631,0.24	0.321		pfkB-like carbohydrate kinase family protein [Source:TAIR;Acc:AT1G49350]
A3SS	AT3G47890	3	-	17670850	17670979	17670850	17670971	17671061	17673530	0.00182597	0.0919911	1.0,0.973,0.979	0.919,0.861,1.0	0.057		Ubiquitin carboxyl-terminal hydrolase-related protein [Source:TAIR;Acc:AT3G47890]
A3SS	AT5G60170	5	+	24229688	24229836	24229699	24229836	24229463	24229555	0.00182511	0.0919911	0.209,0.147,0.102	0.027,0.077,0.056	0.099		RNA binding (RRM/RBD/RNP motifs) family protein [Source:TAIR;Acc:AT5G60170]
A3SS	AT5G27630	5	+	9779299	9779426	9779337	9779426	9779050	9779165	0.00182935	0.0919911	0.0,0.0,0.348	0.211,0.348,0.616	-0.276	ACBP5	Acyl-CoA-binding domain-containing protein 5 [Source:UniProtKB/Swiss-Prot;Acc:Q8RWD9]
A3SS	AT5G49710	5	+	20196159	20196317	20196163	20196317	20195990	20196081	0.0018299	0.0919911	0.882,0.944,1.0	0.823,0.785,0.934	0.095		unknown protein; BEST Arabidopsis thaliana protein match is: unknown protein (TAIR:AT4G24590.1); Has 35333 Blast hits to 34131 proteins in 2444 species: Archae - 798; Bacteria - 22429; Metazoa - 974; Fungi - 991; Plants - 531; Viruses - 0; Other Euk /.../s - 9610 (source: NCBI BLink). [Source:TAIR;Acc:AT5G49710]
A3SS	AT4G18230	4	-	10081529	10081767	10081529	10081731	10081889	10081939	0.00189634	0.0951491	0.045,0.092,0.05	0.249,0.13,0.164	-0.119		FUNCTIONS IN: molecular_function unknown; INVOLVED IN: biological_process unknown; LOCATED IN: endomembrane system; EXPRESSED IN: 23 plant structures; EXPRESSED DURING: 13 growth stages; CONTAINS InterPro DOMAIN/s: Oligosaccharide biosynthesis prote /.../14 like (InterPro:IPR013969); Has 640 Blast hits to 640 proteins in 277 species: Archae - 4; Bacteria - 281; Metazoa - 94; Fungi - 127; Plants -…
A3SS	AT5G66570	5	+	26569290	26569486	26569297	26569486	26568652	26568986	0.0019001	0.0951565	1.0,0.381,1.0	1.0,1.0,1.0	-0.206	PSBO1	Oxygen-evolving enhancer protein 1-1, chloroplastic [Source:UniProtKB/Swiss-Prot;Acc:P23321]
A3SS	AT3G15410	3	+	5206671	5206758	5206734	5206758	5206456	5206581	0.00190489	0.0952158	0.832,1.0,0.95	0.984,1.0,1.0	-0.067		Leucine-rich repeat (LRR) family protein [Source:TAIR;Acc:AT3G15410]
A3SS	AT1G67325	1	-	25210282	25210310	25210282	25210307	25210503	25210613	0.00193588	0.0965815	0.768,0.747,0.833	0.866,0.86,0.89	-0.089		RanBP2-type zinc finger protein At1g67325 [Source:UniProtKB/Swiss-Prot;Acc:Q8GZ43]
A3SS	AT1G18910	1	-	6535977	6536203	6535977	6536174	6536315	6536671	0.00194894	0.0968659	0.932,0.931,0.915	0.959,1.0,1.0	-0.06		zinc ion binding;zinc ion binding [Source:TAIR;Acc:AT1G18910]
A3SS	AT1G28100	1	+	9802040	9802184	9802103	9802184	9801081	9801400	0.00194598	0.0968659	1.0,0.719,1.0	1.0,0.952,1.0	-0.078		unknown protein; Has 64 Blast hits to 64 proteins in 27 species: Archae - 0; Bacteria - 14; Metazoa - 0; Fungi - 6; Plants - 42; Viruses - 0; Other Eukaryotes - 2 (source: NCBI BLink). [Source:TAIR;Acc:AT1G28100]
A3SS	AT2G32700	2	+	13867192	13867266	13867211	13867266	13866771	13866926	0.00195263	0.0968666	0.853,1.0,0.401	1.0,1.0,1.0	-0.249	LUH	LEUNIG_homolog [Source:TAIR;Acc:AT2G32700]
A3SS	AT1G67960	1	-	25482697	25482786	25482697	25482782	25482967	25483016	0.00195732	0.0969167	0.788,0.887,0.896	1.0,0.978,0.88	-0.096	POD1	Protein POLLEN DEFECTIVE IN GUIDANCE 1 [Source:UniProtKB/Swiss-Prot;Acc:F4HVJ3]
A3SS	AT3G48820	3	-	18102592	18102680	18102592	18102632	18102764	18102911	0.00197334	0.0974517	0.477,0.391,0.448	1.0,0.465,0.835	-0.328		Glycosyltransferase family 29 (sialyltransferase) family protein [Source:TAIR;Acc:AT3G48820]
A3SS	AT1G77620	1	-	29168103	29168262	29168103	29168259	29168417	29168686	0.00197933	0.097457	1.0,1.0,1.0	0.892,0.831,1.0	0.092		P-loop containing nucleoside triphosphate hydrolases superfamily protein [Source:TAIR;Acc:AT1G77620]
A3SS	AT5G48000	5	-	19446761	19447008	19446761	19447004	19447201	19447280	0.00199636	0.0976786	1.0,1.0,0.662	1.0,1.0,1.0	-0.113	CYP708A2	Cytochrome P450 708A2 [Source:UniProtKB/Swiss-Prot;Acc:Q8L7D5]
A3SS	AT2G34150	2	-	14422281	14422424	14422281	14422405	14422697	14422850	0.00198858	0.0976786	0.0,0.0,0.0	0.192,0.121,0.053	-0.122	SCAR1	Protein SCAR1 [Source:UniProtKB/Swiss-Prot;Acc:Q6AWX6]
A3SS	AT3G48970	3	-	18153091	18153192	18153091	18153173	18153290	18153375	0.00199191	0.0976786	0.068,0.098,0.056	0.0,0.021,0.028	0.058		Heavy metal transport/detoxification superfamily protein [Source:TAIR;Acc:AT3G48970]
A3SS	AT3G23590	3	+	8470673	8470784	8470677	8470784	8470147	8470358	0.00202628	0.0985076	1.0,1.0,0.329	0.123,0.395,0.44	0.457	MED33A	Mediator of RNA polymerase II transcription subunit 33A [Source:UniProtKB/Swiss-Prot;Acc:Q9LUG9]
A3SS	AT1G15240	1	+	5246928	5246997	5246956	5246997	5246323	5246468	0.00202684	0.0985076	0.794,0.892,0.956	1.0,0.965,0.925	-0.083		Phox-associated domain;Phox-like;Sorting nexin, C-terminal [Source:TAIR;Acc:AT1G15240]
A3SS	AT1G48540	1	+	17946567	17946815	17946572	17946815	17946080	17946338	0.00206567	0.10021	0.1,0.133,0.245	0.03,0.057,0.049	0.114		Outer arm dynein light chain 1 protein [Source:TAIR;Acc:AT1G48540]
A3SS	AT1G16560	1	+	5668860	5669039	5668944	5669039	5668572	5668739	0.00209143	0.10115	0.859,1.0,0.911	0.709,0.885,0.736	0.147		Per1-like family protein [Source:TAIR;Acc:AT1G16560]
A3SS	AT1G66730	1	+	24887663	24887725	24887666	24887725	24887434	24887552	0.002104	0.101323	0.497,1.0,0.497	0.0,0.33,0.798	0.289	AtLIG6	DNA LIGASE 6 [Source:TAIR;Acc:AT1G66730]
A3SS	AT1G61850	1	+	22858688	22858810	22858693	22858810	22858356	22858617	0.00212938	0.102358	0.986,1.0,0.951	0.954,0.832,0.963	0.063	PLA1	Phospholipase A I [Source:UniProtKB/Swiss-Prot;Acc:F4HX15]
A3SS	AT1G42540	1	+	15973486	15973744	15973532	15973744	15973053	15973300	0.00216274	0.103208	1.0,0.963,1.0	0.903,0.904,1.0	0.052	GLR3.3	Glutamate receptor 3.3 [Source:UniProtKB/Swiss-Prot;Acc:Q9C8E7]
A3SS	AT2G30424	2	-	12964505	12964633	12964505	12964630	12965197	12965285	0.00216045	0.103208	0.747,1.0,0.908	0.441,1.0,0.697	0.172	TCL2	MYB-like transcription factor TCL2 [Source:UniProtKB/Swiss-Prot;Acc:B3H4X8]
A3SS	AT3G15390	3	-	5198292	5198536	5198292	5198358	5198838	5198864	0.00218165	0.103922	0.5,0.647,0.29	0.154,0.111,0.2	0.324	SDE5	silencing defective 5 [Source:TAIR;Acc:AT3G15390]
A3SS	AT5G02470	5	-	544304	544429	544304	544424	544714	544900	0.00219895	0.104557	1.0,1.0,1.0	0.808,0.946,1.0	0.082	DPA	Transcription factor-like protein DPA [Source:UniProtKB/Swiss-Prot;Acc:Q9FNY3]
A3SS	AT1G78970	1	+	29703339	29703617	29703396	29703617	29703061	29703283	0.00223086	0.105883	0.114,0.081,0.148	0.0,0.014,0.081	0.083	LUP1	Lupeol synthase 1 [Source:UniProtKB/Swiss-Prot;Acc:Q9C5M3]
A3SS	AT3G01050	3	+	14552	14675	14564	14675	14324	14489	0.00227575	0.10714	1.0,0.823,1.0	0.554,0.583,0.823	0.288	MUB1	Membrane-anchored ubiquitin-fold protein 1 [Source:UniProtKB/Swiss-Prot;Acc:Q9MAB9]
A3SS	AT4G15450	4	+	8840552	8840745	8840578	8840745	8840143	8840253	0.00228123	0.10714	0.0,0.0,0.037	0.052,0.116,0.036	-0.056		Senescence/dehydration-associated protein-related [Source:TAIR;Acc:AT4G15450]
A3SS	AT2G31010	2	+	13196364	13196484	13196369	13196484	13196002	13196253	0.00226997	0.10714	0.966,0.745,0.961	0.646,0.661,0.778	0.196		Protein kinase superfamily protein [Source:TAIR;Acc:AT2G31010]
A3SS	AT4G33000	4	+	15925530	15925765	15925656	15925765	15925228	15925329	0.00228173	0.10714	1.0,0.0,1.0	0.395,0.352,1.0	0.084	CBL10	Calcineurin B-like protein 10 [Source:UniProtKB/Swiss-Prot;Acc:Q7FRS8]
A3SS	AT3G27300	3	-	10086114	10086331	10086114	10086310	10086605	10086696	0.00228987	0.10733	1.0,1.0,1.0	0.907,0.841,0.764	0.163	ACG9	Glucose-6-phosphate 1-dehydrogenase, cytoplasmic isoform 1 [Source:UniProtKB/Swiss-Prot;Acc:Q9LK23]
A3SS	AT1G79820	1	-	30023583	30023727	30023583	30023689	30023980	30024134	0.00229562	0.107409	0.898,0.672,0.97	0.563,0.794,0.535	0.216	SGB1	Probable plastidic glucose transporter 3 [Source:UniProtKB/Swiss-Prot;Acc:Q2V4B9]
A3SS	AT1G06550	1	-	2004866	2004962	2004866	2004923	2005048	2005170	0.00230551	0.107524	1.0,0.443,1.0	0.443,0.614,0.736	0.217		3-hydroxyisobutyryl-CoA hydrolase-like protein 5 [Source:UniProtKB/Swiss-Prot;Acc:Q9SHJ8]
A3SS	AT2G30424	2	-	12964505	12964675	12964505	12964630	12965197	12965285	0.00230625	0.107524	0.698,1.0,0.822	0.607,1.0,0.755	0.053	TCL2	MYB-like transcription factor TCL2 [Source:UniProtKB/Swiss-Prot;Acc:B3H4X8]
A3SS	AT3G57810	3	+	21416082	21416198	21416159	21416198	21415783	21415986	0.00231445	0.107716	0.0,1.0,1.0	0.142,1.0,0.57	0.096		OTU domain-containing protein At3g57810 [Source:UniProtKB/Swiss-Prot;Acc:Q8LBZ4]
A3SS	AT1G76405	1	+	28662938	28663110	28662967	28663110	28662786	28662861	0.00232299	0.107923	0.91,1.0,0.822	0.558,0.698,0.716	0.253	OEP21B	Outer envelope pore protein 21B, chloroplastic [Source:UniProtKB/Swiss-Prot;Acc:Q9FPG2]
A3SS	AT5G54930	5	-	22305732	22305944	22305732	22305935	22306026	22306885	0.00234647	0.1088	1.0,1.0,0.884	1.0,0.322,0.826	0.245		AT hook motif-containing protein [Source:TAIR;Acc:AT5G54930]
A3SS	AT5G42400	5	-	16958222	16958480	16958222	16958469	16958585	16958936	0.00236689	0.109383	0.899,0.753,1.0	0.584,0.652,0.854	0.187	ATXR7	Histone-lysine N-methyltransferase ATXR7 [Source:UniProtKB/Swiss-Prot;Acc:F4K1J4]
A3SS	AT3G13040	3	-	4173280	4173342	4173280	4173337	4173487	4173692	0.00238818	0.110174	0.854,1.0,1.0	1.0,0.898,0.493	0.154		myb-like HTH transcriptional regulator family protein [Source:TAIR;Acc:AT3G13040]
A3SS	AT4G16990	4	+	9562968	9563187	9563023	9563187	9562674	9562885	0.00239729	0.110401	0.978,1.0,1.0	1.0,1.0,0.695	0.094	RLM3	disease resistance protein (TIR-NBS class), putative [Source:TAIR;Acc:AT4G16990]
A3SS	AT1G02100	1	+	390052	390250	390093	390250	389811	389943	0.00241422	0.110793	0.948,1.0,1.0	0.913,0.961,0.835	0.08		Leucine carboxyl methyltransferase [Source:TAIR;Acc:AT1G02100]
A3SS	AT4G05060	4	-	2590064	2590306	2590064	2590298	2590426	2590549	0.00242377	0.111038	0.656,1.0,0.0	0.489,0.0,0.489	0.226	PVA43	Vesicle-associated protein 4-3 [Source:UniProtKB/Swiss-Prot;Acc:Q8LPQ7]
A3SS	AT5G17620	5	-	5806986	5807113	5806986	5807102	5807386	5807512	0.00248019	0.113046	0.068,0.106,0.064	0.128,0.188,0.174	-0.084		CONTAINS InterPro DOMAIN/s: Plant nuclear matrix 1 (InterPro:IPR010604); Has 30201 Blast hits to 17322 proteins in 780 species: Archae - 12; Bacteria - 1396; Metazoa - 17338; Fungi - 3422; Plants - 5037; Viruses - 0; Other Eukaryotes - 2996 (source: /.../BLink). [Source:TAIR;Acc:AT5G17620]
A3SS	AT4G01880	4	-	812381	812563	812381	812550	812652	812718	0.00247538	0.113046	0.911,0.92,0.863	0.735,0.717,0.9	0.114		methyltransferases [Source:TAIR;Acc:AT4G01880]
A3SS	AT5G60940	5	+	24524157	24524225	24524165	24524225	24524026	24524049	0.00250133	0.113408	1.0,0.489,0.589	1.0,0.896,1.0	-0.273	CSTF50	Cleavage stimulation factor subunit 50 [Source:UniProtKB/Swiss-Prot;Acc:Q8L4J2]
A3SS	AT1G78660	1	+	29587877	29587965	29587881	29587965	29587692	29587781	0.00249312	0.113408	1.0,0.905,0.821	0.946,1.0,1.0	-0.073	GGH1	Gamma-glutamyl hydrolase 1 [Source:UniProtKB/Swiss-Prot;Acc:Q9SYL6]
A3SS	AT4G16990	4	+	9562997	9563187	9563023	9563187	9562674	9562885	0.00249856	0.113408	0.971,1.0,1.0	1.0,1.0,0.666	0.102	RLM3	disease resistance protein (TIR-NBS class), putative [Source:TAIR;Acc:AT4G16990]
A3SS	AT1G01690	1	+	249488	249693	249539	249693	249140	249306	0.00252732	0.11439	0.0,0.0,0.0	0.077,0.529,0.0	-0.202	ATPRD3	putative recombination initiation defects 3 [Source:TAIR;Acc:AT1G01690]
A3SS	AT2G06025	2	+	2348542	2348625	2348573	2348625	2348135	2348248	0.00256341	0.115824	0.744,0.744,1.0	1.0,1.0,1.0	-0.171		Acyl-CoA N-acyltransferases (NAT) superfamily protein [Source:TAIR;Acc:AT2G06025]
A3SS	AT4G21430	4	-	11410293	11410357	11410293	11410345	11410525	11410658	0.00258721	0.116699	1.0,0.71,1.0	1.0,1.0,1.0	-0.097	B160	Zinc finger, RING-type;Transcription factor jumonji/aspartyl beta-hydroxylase [Source:TAIR;Acc:AT4G21430]
A3SS	AT5G55100	5	-	22363732	22363976	22363732	22363941	22364074	22364235	0.00264243	0.118422	0.803,0.504,1.0	1.0,1.0,0.71	-0.134		SWAP (Suppressor-of-White-APricot)/surp domain-containing protein [Source:TAIR;Acc:AT5G55100]
A3SS	AT1G04730	1	-	1327043	1327122	1327043	1327117	1327224	1327306	0.00264338	0.118422	1.0,1.0,0.867	0.82,0.717,0.83	0.167	CTF18	P-loop containing nucleoside triphosphate hydrolases superfamily protein [Source:TAIR;Acc:AT1G04730]
A3SS	AT3G03300	3	-	774756	774881	774756	774833	774977	775248	0.00264157	0.118422	1.0,1.0,1.0	0.872,0.848,1.0	0.093	DCL2	Endoribonuclease Dicer homolog 2 [Source:UniProtKB/Swiss-Prot;Acc:Q3EBC8]
A3SS	AT3G16565	3	-	5640702	5640842	5640702	5640798	5641283	5641358	0.00266624	0.119243	0.094,0.322,0.068	0.044,0.056,0.206	0.059		alanine-tRNA ligases;nucleic acid binding;ligases, forming aminoacyl-tRNA and related compounds;nucleotide binding;ATP binding [Source:TAIR;Acc:AT3G16565]
A3SS	AT1G79990	1	+	30089361	30089485	30089365	30089485	30089114	30089189	0.00270333	0.120492	1.0,0.71,1.0	0.873,0.746,0.581	0.17		Coatomer subunit beta'-1 [Source:UniProtKB/Swiss-Prot;Acc:Q9CAA0]
A3SS	AT2G03060	2	+	901598	901798	901612	901798	901142	901317	0.0027632	0.121923	0.062,0.133,0.235	0.178,0.589,0.365	-0.234	AGL30	AGAMOUS-like 30 [Source:TAIR;Acc:AT2G03060]
A3SS	AT2G47300	2	+	19419279	19419380	19419281	19419380	19418470	19419184	0.00277419	0.122	0.665,1.0,0.0	1.0,1.0,1.0	-0.445		ribonuclease Ps [Source:TAIR;Acc:AT2G47300]
A3SS	AT1G08900	1	+	2854314	2854418	2854333	2854418	2854142	2854223	0.00277136	0.122	0.025,0.047,0.081	0.105,0.138,0.165	-0.085	SUGTL3	Sugar transporter ERD6-like 2 [Source:UniProtKB/Swiss-Prot;Acc:Q4F7G0]
A3SS	AT1G33700	1	-	12213538	12213600	12213538	12213590	12214108	12214182	0.00278382	0.122016	0.056,0.119,0.1	0.167,0.258,0.255	-0.135		Beta-glucosidase, GBA2 type family protein [Source:TAIR;Acc:AT1G33700]
A3SS	AT2G31580	2	-	13442310	13442521	13442310	13442371	13442714	13442971	0.00281398	0.122725	0.395,0.304,0.273	0.059,0.163,0.189	0.187	THG1	tRNA(His) guanylyltransferase 1 [Source:UniProtKB/Swiss-Prot;Acc:F4IRQ5]
A3SS	AT3G20720	3	+	7240894	7240949	7240897	7240949	7240690	7240800	0.00283645	0.123297	0.861,0.959,0.932	0.959,1.0,0.975	-0.061		unknown protein; Has 184 Blast hits to 181 proteins in 66 species: Archae - 0; Bacteria - 2; Metazoa - 137; Fungi - 0; Plants - 40; Viruses - 0; Other Eukaryotes - 5 (source: NCBI BLink). [Source:TAIR;Acc:AT3G20720]
A3SS	AT1G29690	1	-	10380259	10380443	10380259	10380433	10380551	10380747	0.00283375	0.123297	0.909,0.968,0.84	0.846,0.829,0.727	0.105	CAD1	MACPF domain-containing protein CAD1 [Source:UniProtKB/Swiss-Prot;Acc:Q9C7N2]
A3SS	AT5G19030	5	-	6357770	6357896	6357770	6357877	6358680	6358749	0.00291751	0.126611	0.14,0.124,0.019	0.046,0.038,0.014	0.062		RNA-binding (RRM/RBD/RNP motifs) family protein [Source:TAIR;Acc:AT5G19030]
A3SS	AT5G22110	5	-	7332088	7332224	7332088	7332219	7332303	7332384	0.0029484	0.127742	0.438,0.299,0.661	0.178,0.163,0.098	0.32	ATDPB2	DNA polymerase epsilon subunit B2 [Source:TAIR;Acc:AT5G22110]
A3SS	AT1G02100	1	+	390021	390250	390093	390250	389811	389943	0.00298257	0.127751	0.938,1.0,1.0	0.903,0.958,0.864	0.071		Leucine carboxyl methyltransferase [Source:TAIR;Acc:AT1G02100]
A3SS	AT3G62620	3	+	23160204	23160320	23160254	23160320	23160035	23160075	0.00297855	0.127751	1.0,1.0,1.0	0.737,1.0,1.0	0.088		sucrose-phosphatase-related [Source:TAIR;Acc:AT3G62620]
A3SS	AT1G02960	1	-	667150	667299	667150	667281	667372	667437	0.00297918	0.127751	0.147,0.204,0.179	0.062,0.053,0.077	0.113		unknown protein; BEST Arabidopsis thaliana protein match is: unknown protein (TAIR:AT1G02965.1); Has 83 Blast hits to 82 proteins in 37 species: Archae - 0; Bacteria - 2; Metazoa - 20; Fungi - 7; Plants - 29; Viruses - 0; Other Eukaryotes - 25 (sour /.../BI BLink). [Source:TAIR;Acc:AT1G02960]
A3SS	AT4G15240	4	-	8703074	8703325	8703074	8703318	8703420	8703628	0.00296761	0.127751	0.764,1.0,1.0	1.0,1.0,1.0	-0.079		Protein of unknown function (DUF604) [Source:TAIR;Acc:AT4G15240]
A3SS	AT4G14720	4	-	8433604	8433701	8433604	8433692	8434180	8434359	0.00297848	0.127751	1.0,0.322,0.655	0.322,0.487,0.0	0.389	TIFY4B	Protein TIFY 4B [Source:UniProtKB/Swiss-Prot;Acc:Q8GY55]
A3SS	AT3G02980	3	-	671434	671563	671434	671534	671844	671989	0.00299244	0.127966	0.219,0.419,0.133	0.071,0.115,0.0	0.195	MCC1	Histone acetyltransferase MCC1 [Source:UniProtKB/Swiss-Prot;Acc:Q9M8T9]
A3SS	AT5G11950	5	+	3854967	3855182	3855057	3855182	3854915	3854954	0.00301481	0.128505	0.76,0.853,0.813	0.707,0.674,0.704	0.114	LOG8	Cytokinin riboside 5'-monophosphate phosphoribohydrolase LOG8 [Source:UniProtKB/Swiss-Prot;Acc:Q84MC2]
A3SS	AT5G09350	5	-	2901900	2902003	2901900	2901978	2902089	2902170	0.00301022	0.128505	0.905,0.812,0.838	1.0,1.0,0.95	-0.132	PI4KB2	Phosphatidylinositol 4-kinase beta 2 [Source:UniProtKB/Swiss-Prot;Acc:Q0WPX9]
A3SS	AT3G06778	3	-	2141112	2141208	2141112	2141164	2141293	2141533	0.00303668	0.12902	0.17,0.072,0.056	0.0,0.037,0.0	0.087		Chaperone DnaJ-domain superfamily protein [Source:TAIR;Acc:AT3G06778]
A3SS	AT3G14130	3	-	4686662	4686725	4686662	4686718	4686800	4686858	0.00310032	0.131256	0.916,1.0,1.0	0.736,0.89,1.0	0.097	GLO4	Peroxisomal (S)-2-hydroxy-acid oxidase GLO4 [Source:UniProtKB/Swiss-Prot;Acc:Q9LJH5]
A3SS	AT3G48190	3	+	17811713	17811858	17811783	17811858	17811559	17811623	0.00310427	0.131256	0.111,0.111,0.108	0.0,0.0,0.032	0.099	ATM	ataxia-telangiectasia mutated [Source:TAIR;Acc:AT3G48190]
A3SS	AT1G70790	1	+	26700583	26700837	26700721	26700837	26700411	26700508	0.0031152	0.131508	0.024,0.064,0.126	0.0,0.021,0.0	0.064		Calcium-dependent lipid-binding (CaLB domain) family protein [Source:TAIR;Acc:AT1G70790]
A3SS	AT1G01320	1	-	127867	127952	127867	127945	128027	128312	0.00317241	0.133495	0.49,0.278,0.49	0.0,0.325,0.138	0.265		Tetratricopeptide repeat (TPR)-like superfamily protein [Source:TAIR;Acc:AT1G01320]
A3SS	AT1G21610	1	+	7577981	7578165	7578051	7578165	7577848	7577896	0.00321583	0.134448	0.096,0.116,0.077	0.03,0.019,0.071	0.056		wound-responsive family protein [Source:TAIR;Acc:AT1G21610]
A3SS	AT5G58160	5	+	23537908	23537959	23537922	23537959	23537744	23537825	0.00321895	0.134448	1.0,0.917,0.928	0.81,1.0,0.815	0.073		actin binding [Source:TAIR;Acc:AT5G58160]
A3SS	AT2G32700	2	+	13867128	13867266	13867214	13867266	13866771	13866926	0.00323193	0.134708	1.0,0.0,1.0	0.56,0.175,1.0	0.088	LUH	LEUNIG_homolog [Source:TAIR;Acc:AT2G32700]
A3SS	AT1G53490	1	+	19966448	19966710	19966478	19966710	19966173	19966343	0.00327876	0.136444	1.0,0.677,0.834	0.626,0.637,0.599	0.216	HEI10	E3 ubiquitin-protein ligase CCNB1IP1 homolog [Source:UniProtKB/Swiss-Prot;Acc:F4HRI2]
A3SS	AT1G71810	1	-	27006076	27006155	27006076	27006135	27006474	27006510	0.00331252	0.137632	0.307,0.328,0.112	0.45,0.434,0.539	-0.225		Uncharacterized aarF domain-containing protein kinase At1g71810, chloroplastic [Source:UniProtKB/Swiss-Prot;Acc:Q94BU1]
A3SS	AT5G17440	5	+	5751857	5752058	5751995	5752058	5751694	5751756	0.00334918	0.138936	0.188,0.061,0.113	0.133,0.314,0.29	-0.125		LUC7 related protein [Source:TAIR;Acc:AT5G17440]
A3SS	AT1G02100	1	+	391002	391123	391025	391123	390761	390864	0.00336704	0.13945	0.863,0.903,0.921	0.863,0.725,0.849	0.083		Leucine carboxyl methyltransferase [Source:TAIR;Acc:AT1G02100]
A3SS	AT1G13350	1	-	4575961	4576018	4575961	4576004	4576238	4576632	0.00337217	0.13945	1.0,1.0,1.0	1.0,1.0,0.535	0.155		Protein kinase superfamily protein [Source:TAIR;Acc:AT1G13350]
A3SS	AT1G15240	1	+	5246875	5247118	5246940	5247118	5246323	5246468	0.0034126	0.14068	0.412,1.0,0.636	1.0,1.0,1.0	-0.317		Phox-associated domain;Phox-like;Sorting nexin, C-terminal [Source:TAIR;Acc:AT1G15240]
A3SS	AT4G31480	4	+	15263666	15263833	15263829	15263833	15263153	15263338	0.00344087	0.141289	0.643,0.533,1.0	1.0,0.786,1.0	-0.203		Coatomer subunit beta-1 [Source:UniProtKB/Swiss-Prot;Acc:Q9SV21]
A3SS	AT5G67170	5	+	26800030	26800131	26800072	26800131	26799765	26799901	0.00344345	0.141289	0.75,1.0,0.887	1.0,0.945,1.0	-0.103		SEC-C motif-containing protein / OTU-like cysteine protease family protein [Source:TAIR;Acc:AT5G67170]
A3SS	AT4G13575	4	-	7893068	7893310	7893068	7893189	7893402	7893476	0.00348631	0.142166	0.356,0.217,0.526	1.0,1.0,0.356	-0.419		unknown protein; FUNCTIONS IN: molecular_function unknown; INVOLVED IN: biological_process unknown; LOCATED IN: cellular_component unknown; Has 30201 Blast hits to 17322 proteins in 780 species: Archae - 12; Bacteria - 1396; Metazoa - 17338; Fungi - /.../ Plants - 5037; Viruses - 0; Other Eukaryotes - 2996 (source: NCBI BLink). [Source:TAIR;Acc:AT4G13575]
A3SS	AT1G50970	1	+	18898880	18898986	18898881	18898986	18898671	18898788	0.00349027	0.142166	0.0,0.25,1.0	1.0,0.2,1.0	-0.317		Vacuolar protein sorting-associated protein 53 B [Source:UniProtKB/Swiss-Prot;Acc:F4I7Y2]
A3SS	AT3G44970	3	+	16434071	16434150	16434121	16434150	16433913	16434006	0.00349181	0.142166	1.0,1.0,1.0	0.952,1.0,0.891	0.052		Cytochrome P450 superfamily protein [Source:TAIR;Acc:AT3G44970]
A3SS	AT1G01690	1	+	249488	249693	249542	249693	249140	249306	0.00348842	0.142166	0.0,0.0,0.0	0.039,0.307,0.0	-0.115	ATPRD3	putative recombination initiation defects 3 [Source:TAIR;Acc:AT1G01690]
A3SS	AT5G16190	5	-	5286037	5286136	5286037	5286104	5286215	5286293	0.00353852	0.143624	0.924,0.966,0.828	1.0,1.0,0.901	-0.061	CSLA11	Probable mannan synthase 11 [Source:UniProtKB/Swiss-Prot;Acc:Q9LF09]
A3SS	AT1G05710	1	+	1716174	1716283	1716195	1716283	1714949	1715384	0.00355758	0.144175	0.382,0.19,0.164	0.054,0.089,0.068	0.175		basic helix-loop-helix (bHLH) DNA-binding superfamily protein [Source:TAIR;Acc:AT1G05710]
A3SS	AT1G01110	1	+	52868	53183	52937	53183	52433	52730	0.00359531	0.145455	0.0,0.0,0.0	0.256,0.0,0.0	-0.085	IQD18	IQ-domain 18 [Source:TAIR;Acc:AT1G01110]
A3SS	AT1G55830	1	-	20868935	20869129	20868935	20869102	20869284	20869703	0.00360021	0.145455	0.751,1.0,0.975	0.923,1.0,1.0	-0.066		unknown protein; CONTAINS InterPro DOMAIN/s: Protein of unknown function DUF812 (InterPro:IPR008530); Has 10940 Blast hits to 7289 proteins in 653 species: Archae - 228; Bacteria - 791; Metazoa - 6174; Fungi - 805; Plants - 342; Viruses - 19; Other /.../otes - 2581 (source: NCBI BLink). [Source:TAIR;Acc:AT1G55830]
A3SS	AT3G02600	3	+	551604	551847	551683	551847	551350	551584	0.00361286	0.145743	1.0,0.913,1.0	0.591,1.0,0.908	0.138	LPP3	Putative lipid phosphate phosphatase 3, chloroplastic [Source:UniProtKB/Swiss-Prot;Acc:Q8LFD1]
A3SS	AT1G16570	1	-	5673330	5673456	5673330	5673428	5673553	5673600	0.0036419	0.145798	0.061,0.0,0.0	0.124,0.033,0.124	-0.073		UDP-Glycosyltransferase superfamily protein [Source:TAIR;Acc:AT1G16570]
A3SS	AT1G68890	1	+	25901356	25901581	25901478	25901581	25900475	25901039	0.00364081	0.145798	1.0,0.937,0.945	0.916,0.943,0.817	0.069	PHYLLO	Protein PHYLLO, chloroplastic [Source:UniProtKB/Swiss-Prot;Acc:Q15KI9]
A3SS	AT5G36950	5	+	14596991	14597119	14597007	14597119	14596648	14596908	0.00363414	0.145798	0.945,0.831,0.973	1.0,0.982,1.0	-0.078	DEGP10	Protease Do-like 10, mitochondrial [Source:UniProtKB/Swiss-Prot;Acc:Q9FIV6]
A3SS	AT3G61480	3	+	22752999	22753160	22753027	22753160	22752698	22752894	0.00366686	0.146426	0.297,0.0,0.0	0.057,0.0,0.0	0.08		Quinoprotein amine dehydrogenase, beta chain-like; RIC1-like guanyl-nucleotide exchange factor [Source:TAIR;Acc:AT3G61480]
A3SS	AT3G63340	3	-	23394660	23394831	23394660	23394800	23395260	23395417	0.00366871	0.146426	1.0,1.0,1.0	0.769,1.0,0.714	0.172		Protein phosphatase 2C family protein [Source:TAIR;Acc:AT3G63340]
A3SS	AT4G28830	4	+	14233074	14233149	14233079	14233149	14232909	14233003	0.0037255	0.147797	0.109,0.112,0.0	0.0,0.0,0.02	0.067		S-adenosyl-L-methionine-dependent methyltransferases superfamily protein [Source:TAIR;Acc:AT4G28830]
A3SS	AT3G53500	3	-	19835872	19836130	19835872	19835912	19836400	19836514	0.00376618	0.148739	0.183,0.167,0.179	0.202,0.24,0.256	-0.056	RS2Z32	Serine/arginine-rich splicing factor RS2Z32 [Source:UniProtKB/Swiss-Prot;Acc:Q9FYB7]
A3SS	AT1G05900	1	+	1787149	1787266	1787153	1787266	1786855	1787043	0.00376199	0.148739	1.0,0.0,1.0	0.329,0.0,1.0	0.224	NTH2	Endonuclease III homolog 2, chloroplastic [Source:UniProtKB/Swiss-Prot;Acc:B9DFZ0]
A3SS	AT1G68890	1	+	25900274	25900378	25900323	25900378	25899971	25900153	0.00376493	0.148739	1.0,1.0,0.917	0.928,0.872,0.94	0.059	PHYLLO	Protein PHYLLO, chloroplastic [Source:UniProtKB/Swiss-Prot;Acc:Q15KI9]
A3SS	AT1G79630	1	-	29964905	29965460	29964905	29965147	29965655	29965795	0.00377484	0.148857	1.0,1.0,1.0	0.875,0.818,1.0	0.102		Probable protein phosphatase 2C 18 [Source:UniProtKB/Swiss-Prot;Acc:Q8RXZ4]
A3SS	AT2G01818	2	-	354647	354914	354647	354722	355361	355522	0.00382567	0.150637	0.931,0.915,0.806	0.92,1.0,0.952	-0.073		PLATZ transcription factor family protein [Source:TAIR;Acc:AT2G01818]
A3SS	AT1G32750	1	-	11853773	11853966	11853773	11853945	11854044	11854136	0.00387017	0.151708	0.107,0.109,0.056	0.064,0.0,0.023	0.062	TAF1	Transcription initiation factor TFIID subunit 1 [Source:UniProtKB/Swiss-Prot;Acc:Q8LRK9]
A3SS	AT1G02960	1	-	667956	668082	667956	668077	668172	668468	0.00392868	0.153318	1.0,0.982,0.937	0.905,0.87,0.984	0.053		unknown protein; BEST Arabidopsis thaliana protein match is: unknown protein (TAIR:AT1G02965.1); Has 83 Blast hits to 82 proteins in 37 species: Archae - 0; Bacteria - 2; Metazoa - 20; Fungi - 7; Plants - 29; Viruses - 0; Other Eukaryotes - 25 (sour /.../BI BLink). [Source:TAIR;Acc:AT1G02960]
A3SS	AT5G27560	5	+	9732957	9733072	9732985	9733072	9732776	9732891	0.00397429	0.154868	1.0,1.0,1.0	1.0,0.22,0.679	0.367		Domain of unknown function (DUF1995) [Source:TAIR;Acc:AT5G27560]
A3SS	AT2G23985	2	+	10205449	10205501	10205461	10205501	10204991	10205241	0.00398329	0.154989	0.42,0.424,0.63	0.251,0.309,0.354	0.187		unknown protein; Has 2 Blast hits to 2 proteins in 1 species: Archae - 0; Bacteria - 0; Metazoa - 0; Fungi - 0; Plants - 2; Viruses - 0; Other Eukaryotes - 0 (source: NCBI BLink). [Source:TAIR;Acc:AT2G23985]
A3SS	AT5G45760	5	+	18561816	18561876	18561856	18561876	18561668	18561731	0.00401008	0.155802	0.912,1.0,1.0	0.893,0.76,1.0	0.086		Transducin/WD40 repeat-like superfamily protein [Source:TAIR;Acc:AT5G45760]
A3SS	AT3G05570	3	-	1616462	1616662	1616462	1616648	1617285	1617339	0.00404577	0.156038	0.075,0.0,0.038	0.195,0.087,0.031	-0.067		unknown protein; BEST Arabidopsis thaliana protein match is: unknown protein (TAIR:AT4G39235.1); Has 73 Blast hits to 73 proteins in 11 species: Archae - 0; Bacteria - 0; Metazoa - 0; Fungi - 0; Plants - 73; Viruses - 0; Other Eukaryotes - 0 (source /.../ BLink). [Source:TAIR;Acc:AT3G05570]
A3SS	AT5G23870	5	-	8047137	8047313	8047137	8047197	8047405	8047530	0.00404212	0.156038	0.22,0.0,0.361	0.201,1.0,0.22	-0.28	PAE9	Pectin acetylesterase 9 [Source:UniProtKB/Swiss-Prot;Acc:B9DFR3]
A3SS	AT5G57190	5	-	23174713	23174813	23174713	23174793	23174886	23174911	0.00404063	0.156038	0.0,0.05,0.0	0.293,0.0,0.0	-0.081	PSD2	Phosphatidylserine decarboxylase proenzyme 2 [Source:UniProtKB/Swiss-Prot;Acc:F4KAK5]
A3SS	AT1G30410	1	+	10743310	10743414	10743332	10743414	10743076	10743217	0.00409217	0.157596	0.11,0.104,0.055	0.271,0.173,0.153	-0.109	ATMRP13	multidrug resistance-associated protein 13 [Source:TAIR;Acc:AT1G30410]
A3SS	AT2G44480	2	+	18361053	18361301	18361143	18361301	18360883	18360971	0.0041436	0.158649	0.935,0.758,0.738	1.0,1.0,0.849	-0.139	BGLU17	Beta-glucosidase 17 [Source:UniProtKB/Swiss-Prot;Acc:O64882]
A3SS	AT1G07010	1	+	2154046	2154187	2154051	2154187	2153749	2153962	0.00414237	0.158649	0.183,0.116,0.123	0.27,0.237,0.139	-0.075		Calcineurin-like metallo-phosphoesterase superfamily protein [Source:TAIR;Acc:AT1G07010]
A3SS	AT1G15240	1	+	5246875	5247118	5246956	5247118	5246323	5246468	0.00421896	0.160834	0.484,0.672,0.695	1.0,0.745,0.796	-0.23		Phox-associated domain;Phox-like;Sorting nexin, C-terminal [Source:TAIR;Acc:AT1G15240]
A3SS	AT1G05870	1	-	1772096	1772163	1772096	1772141	1772355	1772533	0.00426688	0.162191	0.0,0.0,0.0	0.105,0.149,0.305	-0.186		Protein of unknown function (DUF1685) [Source:TAIR;Acc:AT1G05870]
A3SS	AT1G16540	1	+	5664660	5664794	5664663	5664794	5664357	5664590	0.00433552	0.163844	0.978,0.966,1.0	0.91,0.956,0.905	0.058	ABA3	Molybdenum cofactor sulfurase [Source:UniProtKB/Swiss-Prot;Acc:Q9C5X8]
A3SS	AT4G31480	4	+	15263661	15263833	15263829	15263833	15263153	15263338	0.00434769	0.163844	0.643,0.563,1.0	1.0,0.786,1.0	-0.193		Coatomer subunit beta-1 [Source:UniProtKB/Swiss-Prot;Acc:Q9SV21]
A3SS	AT3G49140	3	-	18214285	18214398	18214285	18214384	18214742	18214962	0.00432379	0.163844	0.073,0.093,0.084	0.244,0.098,0.117	-0.07		Uncharacterized protein At3g49140 [Source:UniProtKB/Swiss-Prot;Acc:Q0WMN5]
A3SS	AT1G07890	1	+	2437677	2437741	2437680	2437741	2437329	2437555	0.00433204	0.163844	0.33,0.093,0.078	0.51,0.429,0.203	-0.214	APX1	L-ascorbate peroxidase 1, cytosolic [Source:UniProtKB/Swiss-Prot;Acc:Q05431]
A3SS	AT1G10670	1	+	3536390	3536548	3536392	3536548	3536130	3536307	0.00434519	0.163844	1.0,1.0,0.665	1.0,1.0,1.0	-0.112	ACLA-1	ATP-citrate synthase alpha chain protein 1 [Source:UniProtKB/Swiss-Prot;Acc:Q9SGY2]
A3SS	AT1G15290	1	-	5261434	5261532	5261434	5261529	5261622	5261685	0.00434765	0.163844	0.568,1.0,1.0	0.597,0.141,0.33	0.5		Tetratricopeptide repeat (TPR)-like superfamily protein [Source:TAIR;Acc:AT1G15290]
A3SS	AT3G62310	3	-	23058276	23058506	23058276	23058475	23058773	23059858	0.00435436	0.163861	0.588,1.0,1.0	1.0,1.0,1.0	-0.137		RNA helicase family protein [Source:TAIR;Acc:AT3G62310]
A3SS	AT5G08130	5	-	2608298	2608399	2608298	2608370	2608483	2608885	0.00438819	0.164663	0.457,0.393,0.376	0.729,0.74,0.55	-0.264	BIM1	Transcription factor BIM1 [Source:UniProtKB/Swiss-Prot;Acc:Q9LEZ3]
A3SS	AT5G55100	5	-	22363905	22363941	22363905	22363935	22364074	22364235	0.00440703	0.165135	0.054,0.181,0.029	0.025,0.0,0.061	0.059		SWAP (Suppressor-of-White-APricot)/surp domain-containing protein [Source:TAIR;Acc:AT5G55100]
A3SS	AT5G06670	5	-	2051532	2051731	2051532	2051637	2051830	2051935	0.00441736	0.165287	0.064,0.0,0.0	0.022,0.435,0.0	-0.131		P-loop containing nucleoside triphosphate hydrolases superfamily protein [Source:TAIR;Acc:AT5G06670]
A3SS	AT1G08550	1	+	2708186	2708283	2708191	2708283	2707754	2707921	0.00451053	0.168534	0.931,0.969,0.92	0.871,0.845,0.91	0.065	VDE1	Violaxanthin de-epoxidase, chloroplastic [Source:UniProtKB/Swiss-Prot;Acc:Q39249]
A3SS	AT4G13575	4	-	7893068	7893189	7893068	7893146	7893402	7893476	0.00452449	0.168577	0.609,0.609,1.0	0.0,0.0,1.0	0.406		unknown protein; FUNCTIONS IN: molecular_function unknown; INVOLVED IN: biological_process unknown; LOCATED IN: cellular_component unknown; Has 30201 Blast hits to 17322 proteins in 780 species: Archae - 12; Bacteria - 1396; Metazoa - 17338; Fungi - /.../ Plants - 5037; Viruses - 0; Other Eukaryotes - 2996 (source: NCBI BLink). [Source:TAIR;Acc:AT4G13575]
A3SS	AT3G01710	3	-	260471	260546	260471	260537	260628	260687	0.00452423	0.168577	0.703,0.792,1.0	0.792,0.213,0.689	0.267		TPX2 (targeting protein for Xklp2) protein family [Source:TAIR;Acc:AT3G01710]
A3SS	AT3G48820	3	-	18102592	18102680	18102592	18102677	18102764	18102911	0.00454273	0.169018	1.0,0.0,1.0	0.0,0.0,0.612	0.463		Glycosyltransferase family 29 (sialyltransferase) family protein [Source:TAIR;Acc:AT3G48820]
A3SS	AT1G11300	1	+	3795765	3795873	3795810	3795873	3794237	3795676	0.00460239	0.170755	1.0,0.537,0.844	0.776,1.0,1.0	-0.132		protein serine/threonine kinases;protein kinases;ATP binding;sugar binding;kinases;carbohydrate binding [Source:TAIR;Acc:AT1G11300]
A3SS	AT4G29860	4	-	14605141	14605198	14605141	14605194	14605275	14605491	0.00461162	0.170857	1.0,1.0,1.0	0.934,0.702,1.0	0.121	DSE1	Protein DECREASED SIZE EXCLUSION LIMIT 1 [Source:UniProtKB/Swiss-Prot;Acc:Q3MV14]
A3SS	AT1G06730	1	+	2068248	2068496	2068264	2068496	2067528	2068010	0.0046226	0.171023	1.0,1.0,1.0	1.0,1.0,0.775	0.075		pfkB-like carbohydrate kinase family protein [Source:TAIR;Acc:AT1G06730]
A3SS	AT3G17030	3	-	5805449	5805557	5805449	5805524	5805631	5805792	0.00463248	0.171148	0.093,0.171,0.0	0.112,0.215,0.141	-0.068		Nucleic acid-binding proteins superfamily [Source:TAIR;Acc:AT3G17030]
A3SS	AT2G41200	2	+	17171783	17171922	17171789	17171922	17171624	17171678	0.00465739	0.171348	0.744,0.492,0.853	1.0,1.0,1.0	-0.304		unknown protein; Has 26 Blast hits to 26 proteins in 11 species: Archae - 0; Bacteria - 0; Metazoa - 0; Fungi - 0; Plants - 26; Viruses - 0; Other Eukaryotes - 0 (source: NCBI BLink). [Source:TAIR;Acc:AT2G41200]
A3SS	AT4G25120	4	+	12893883	12893958	12893908	12893958	12893672	12893806	0.0046526	0.171348	0.945,0.711,1.0	1.0,1.0,0.88	-0.075	SRS2	P-loop containing nucleoside triphosphate hydrolases superfamily protein [Source:TAIR;Acc:AT4G25120]
A3SS	AT5G56160	5	+	22733665	22733770	22733696	22733770	22733434	22733512	0.00470409	0.171698	0.373,1.0,0.0	0.714,1.0,0.902	-0.414	SFH14	Phosphatidylinositol/phosphatidylcholine transfer protein SFH14 [Source:UniProtKB/Swiss-Prot;Acc:F4K6D3]
A3SS	AT5G13390	5	+	4294836	4295065	4294845	4295065	4294183	4294755	0.00469044	0.171698	0.373,0.425,0.487	0.326,0.24,0.318	0.134	NEF1	no exine formation 1 [Source:TAIR;Acc:AT5G13390]
A3SS	AT2G39830	2	-	16621583	16621667	16621583	16621654	16621782	16621906	0.00469266	0.171698	1.0,1.0,1.0	0.84,0.683,1.0	0.159	DAR2	Protein DA1-related 2 [Source:UniProtKB/Swiss-Prot;Acc:Q0WSN2]
A3SS	AT4G31115	4	+	15130941	15131055	15130946	15131055	15130074	15130652	0.00467902	0.171698	0.292,0.257,0.336	0.159,0.199,0.087	0.147		Protein of unknown function (DUF1997) [Source:TAIR;Acc:AT4G31115]
A3SS	AT5G66130	5	+	26436156	26436282	26436163	26436282	26435715	26436079	0.00472789	0.172258	0.706,0.818,0.841	0.794,1.0,1.0	-0.143	RAD17	Cell cycle checkpoint protein RAD17 [Source:UniProtKB/Swiss-Prot;Acc:Q9MBA3]
A3SS	AT2G31865	2	-	13547181	13547382	13547181	13547355	13547451	13547536	0.00474127	0.172506	0.221,1.0,0.719	1.0,1.0,1.0	-0.353	PARG2	Probable poly(ADP-ribose) glycohydrolase 2 [Source:UniProtKB/Swiss-Prot;Acc:Q8VYA1]
A3SS	AT5G04220	5	-	1157531	1157633	1157531	1157626	1157711	1157830	0.00479906	0.173411	1.0,0.849,0.947	1.0,1.0,1.0	-0.068	SYT3	Synaptotagmin-3 [Source:UniProtKB/Swiss-Prot;Acc:Q7XA06]
A3SS	AT1G10870	1	-	3617838	3617929	3617838	3617924	3618076	3618198	0.00478649	0.173411	0.958,0.984,0.913	0.83,0.947,0.872	0.069	AGD4	ADP-ribosylation factor GTPase-activating protein AGD4 [Source:UniProtKB/Swiss-Prot;Acc:Q9SMX5]
A3SS	AT1G34150	1	+	12438535	12438692	12438575	12438692	12438333	12438451	0.0049066	0.176925	1.0,1.0,1.0	1.0,0.284,0.0	0.572		Pseudouridine synthase family protein [Source:TAIR;Acc:AT1G34150]
A3SS	AT3G27770	3	-	10287025	10287059	10287025	10287058	10287396	10287575	0.00492283	0.177155	0.0,0.0,0.0	0.0,0.0,0.927	-0.309		unknown protein; FUNCTIONS IN: molecular_function unknown; INVOLVED IN: biological_process unknown; LOCATED IN: endomembrane system; EXPRESSED IN: 22 plant structures; EXPRESSED DURING: 13 growth stages; BEST Arabidopsis thaliana protein match is: u /.../ protein (TAIR:AT5G62960.1); Has 158 Blast hits to 157 proteins in 21 species: Archae - 0; Bacteria - 0; Metazoa - 13; Fungi - 0; Plants - 141; …
A3SS	AT4G16970	4	-	9554223	9554290	9554223	9554284	9554416	9555112	0.00497979	0.178716	1.0,0.871,0.968	0.861,0.906,0.879	0.064		Protein kinase superfamily protein [Source:TAIR;Acc:AT4G16970]
A3SS	AT3G55750	3	+	20699839	20700067	20699844	20700067	20699519	20699554	0.00501352	0.179194	0.886,0.609,1.0	1.0,1.0,1.0	-0.168	RPL35AD	60S ribosomal protein L35a-4 [Source:UniProtKB/Swiss-Prot;Acc:P51422]
A3SS	AT2G25590	2	+	10892205	10892352	10892262	10892352	10891877	10892123	0.00503481	0.179468	1.0,0.925,1.0	1.0,0.829,0.923	0.058		Plant Tudor-like protein [Source:TAIR;Acc:AT2G25590]
A3SS	AT1G69610	1	+	26188762	26188996	26188769	26188996	26188287	26188689	0.0050468	0.179652	0.0,0.59,0.325	0.138,0.0,0.107	0.223		Protein of unknown function (DUF1666) [Source:TAIR;Acc:AT1G69610]
A3SS	AT1G61150	1	+	22542836	22542981	22542862	22542981	22542523	22542673	0.00506426	0.180031	0.333,0.417,0.448	0.292,0.352,0.205	0.116		LisH and RanBPM domains containing protein [Source:TAIR;Acc:AT1G61150]
A3SS	AT5G04810	5	+	1391609	1391696	1391617	1391696	1391378	1391519	0.00516716	0.182457	0.77,0.87,0.827	0.767,0.733,0.654	0.104	PPR4	Pentatricopeptide repeat-containing protein At5g04810, chloroplastic [Source:UniProtKB/Swiss-Prot;Acc:Q0WMY5]
A3SS	AT2G17320	2	-	7534331	7534414	7534331	7534387	7534503	7534632	0.00526921	0.185316	0.46,0.743,0.598	0.773,0.923,0.923	-0.273		Uncharacterised conserved protein (UCP030210) [Source:TAIR;Acc:AT2G17320]
A3SS	AT3G02280	3	+	453588	453786	453608	453786	453420	453510	0.00529492	0.185477	1.0,1.0,1.0	1.0,0.78,0.794	0.142	ATR3	NADPH-dependent diflavin oxidoreductase 1 [Source:UniProtKB/Swiss-Prot;Acc:Q6NPS8]
A3SS	AT1G11650	1	+	3916142	3916232	3916145	3916232	3915427	3915893	0.00533732	0.186714	0.115,0.088,0.148	0.0,0.052,0.068	0.077	RBP45B	Polyadenylate-binding protein RBP45B [Source:UniProtKB/Swiss-Prot;Acc:Q9SAB3]
A3SS	AT3G61470	3	+	22746093	22746258	22746113	22746258	22745652	22745788	0.00538463	0.18787	0.867,0.932,0.864	0.984,0.985,0.917	-0.074	LHCA2	photosystem I light harvesting complex gene 2 [Source:TAIR;Acc:AT3G61470]
A3SS	AT3G62310	3	-	23058276	23058488	23058276	23058402	23058773	23059858	0.00544452	0.189708	0.185,0.171,0.26	0.313,0.293,0.277	-0.089		RNA helicase family protein [Source:TAIR;Acc:AT3G62310]
A3SS	AT1G50030	1	-	18535243	18535346	18535243	18535338	18535431	18535553	0.0054539	0.189784	1.0,1.0,1.0	0.793,0.741,0.656	0.27	TOR	Serine/threonine-protein kinase TOR [Source:UniProtKB/Swiss-Prot;Acc:Q9FR53]
A3SS	AT3G62190	3	+	23022016	23022259	23022226	23022259	23021634	23021689	0.00547567	0.19029	0.133,0.14,0.287	0.275,0.254,0.269	-0.079		Chaperone DnaJ-domain superfamily protein [Source:TAIR;Acc:AT3G62190]
A3SS	AT4G08590	4	-	5464907	5465006	5464907	5465003	5465151	5465675	0.00551912	0.191548	1.0,0.94,1.0	0.831,0.879,1.0	0.077	ORTHL	E3 ubiquitin-protein ligase ORTHRUS-LIKE 1 [Source:UniProtKB/Swiss-Prot;Acc:Q681I0]
A3SS	AT5G13530	5	+	4349758	4349880	4349761	4349880	4349245	4349403	0.00555155	0.19242	0.925,0.757,0.844	0.664,0.692,0.677	0.164	KEG	E3 ubiquitin-protein ligase KEG [Source:UniProtKB/Swiss-Prot;Acc:Q9FY48]
A3SS	AT5G04920	5	-	1439739	1439809	1439739	1439804	1439908	1439966	0.0056456	0.194327	0.919,0.935,0.838	0.854,0.797,0.825	0.072	VPS36	Vacuolar protein sorting-associated protein 36 [Source:UniProtKB/Swiss-Prot;Acc:Q9FF81]
A3SS	AT4G34840	4	+	16607332	16607470	16607347	16607470	16607155	16607230	0.00564901	0.194327	0.039,0.089,0.141	0.0,0.0,0.067	0.067	MTN2	5'-methylthioadenosine/S-adenosylhomocysteine nucleosidase 2 [Source:UniProtKB/Swiss-Prot;Acc:Q7XA67]
A3SS	AT4G27370	4	-	13695335	13695548	13695335	13695535	13695618	13695734	0.00572554	0.195698	1.0,1.0,1.0	0.885,0.966,0.876	0.091	VIII-B	Myosin-4 [Source:UniProtKB/Swiss-Prot;Acc:F4JIU4]
A3SS	AT5G37340	5	-	14788439	14788548	14788439	14788544	14788992	14789219	0.00572785	0.195698	1.0,1.0,0.958	0.951,0.735,1.0	0.091		ZPR1 zinc-finger domain protein [Source:TAIR;Acc:AT5G37340]
A3SS	AT5G48545	5	+	19676957	19677034	19676967	19677034	19676741	19676799	0.00576961	0.196167	0.396,0.492,0.485	0.351,0.357,0.351	0.105	HINT3	histidine triad nucleotide-binding 3 [Source:TAIR;Acc:AT5G48545]
A3SS	AT3G06760	3	+	2133515	2133763	2133685	2133763	2133142	2133291	0.00577138	0.196167	0.075,0.085,0.107	0.143,0.116,0.16	-0.051	DI19-4	Protein DEHYDRATION-INDUCED 19 homolog 4 [Source:UniProtKB/Swiss-Prot;Acc:Q8VXU6]
A3SS	AT5G56870	5	+	23005999	23006082	23006001	23006082	23005568	23005675	0.00580079	0.196273	1.0,0.894,1.0	1.0,0.799,0.825	0.09	BGAL4	Beta-galactosidase 4 [Source:UniProtKB/Swiss-Prot;Acc:Q9SCV8]
A3SS	AT1G09840	1	-	3199380	3199623	3199380	3199619	3200035	3200291	0.00580325	0.196273	0.744,0.808,0.817	0.892,0.856,0.854	-0.078	ASK10	Shaggy-related protein kinase kappa [Source:UniProtKB/Swiss-Prot;Acc:Q39019]
A3SS	AT3G47390	3	+	17462547	17462687	17462552	17462687	17462071	17462450	0.00578363	0.196273	0.46,0.089,0.214	0.478,0.476,0.508	-0.233	PYRR	Riboflavin biosynthesis protein PYRR, chloroplastic [Source:UniProtKB/Swiss-Prot;Acc:Q9STY4]
A3SS	AT1G64230	1	+	23833749	23833861	23833769	23833861	23833550	23833671	0.00584037	0.196778	1.0,1.0,1.0	1.0,1.0,0.065	0.312	UBC28	Ubiquitin-conjugating enzyme E2 28 [Source:UniProtKB/Swiss-Prot;Acc:Q94F47]
A3SS	AT1G07600	1	-	2338903	2338978	2338903	2338975	2339265	2339321	0.00584164	0.196778	0.299,0.448,0.861	0.679,0.522,1.0	-0.198	MT1A	Metallothionein-like protein 1A [Source:UniProtKB/Swiss-Prot;Acc:P43392]
A3SS	AT4G32915	4	+	15885877	15886072	15886016	15886072	15885519	15885791	0.00590002	0.197775	0.722,1.0,1.0	0.438,1.0,0.784	0.167	GATC	Glutamyl-tRNA(Gln) amidotransferase subunit C, chloroplastic/mitochondrial [Source:UniProtKB/Swiss-Prot;Acc:F4JV80]
A3SS	AT2G33380	2	-	14145269	14145339	14145269	14145321	14145487	14145582	0.00590539	0.197775	1.0,0.89,0.729	1.0,1.0,1.0	-0.127	PXG3	Probable peroxygenase 3 [Source:UniProtKB/Swiss-Prot;Acc:O22788]
A3SS	AT5G47490	5	+	19267089	19267222	19267099	19267222	19266874	19267000	0.0058945	0.197775	0.1,0.0,0.163	0.0,0.0,0.09	0.058	SEC16B	Protein transport protein SEC16B homolog [Source:UniProtKB/Swiss-Prot;Acc:Q9FGK8]
A3SS	AT3G62310	3	-	23058276	23058488	23058276	23058475	23058773	23059858	0.00590476	0.197775	0.514,1.0,1.0	1.0,1.0,1.0	-0.162		RNA helicase family protein [Source:TAIR;Acc:AT3G62310]
A3SS	AT4G38230	4	-	17931200	17931312	17931200	17931308	17931478	17931511	0.00593198	0.197798	0.837,1.0,0.855	1.0,1.0,1.0	-0.103	CPK26	Calcium-dependent protein kinase 26 [Source:UniProtKB/Swiss-Prot;Acc:Q9SZM3]
A3SS	AT5G09330	5	-	2894551	2894755	2894551	2894746	2895310	2895422	0.00595528	0.198324	0.942,0.769,1.0	1.0,1.0,1.0	-0.096	VNI1	NAC domain containing protein 82 [Source:TAIR;Acc:AT5G09330]
A3SS	AT1G15215	1	+	5238228	5238314	5238235	5238314	5238064	5238149	0.00599283	0.19874	0.953,0.931,0.931	0.762,0.881,0.766	0.135	SHH1	Protein SAWADEE HOMEODOMAIN HOMOLOG 1 [Source:UniProtKB/Swiss-Prot;Acc:Q9XI47]
A3SS	AT3G05760	3	+	1709580	1709702	1709645	1709702	1709365	1709426	0.00599795	0.19874	1.0,1.0,0.93	1.0,0.759,0.875	0.099		C2H2 and C2HC zinc fingers superfamily protein [Source:TAIR;Acc:AT3G05760]
A3SS	AT2G28470	2	-	12172981	12173172	12172981	12173151	12173258	12173298	0.0059784	0.19874	0.253,0.181,0.439	0.532,0.383,0.663	-0.235	BGAL8	Beta-galactosidase 8 [Source:UniProtKB/Swiss-Prot;Acc:Q9SCV4]
A3SS	AT5G58790	5	+	23745447	23745636	23745467	23745636	23745249	23745359	0.0059977	0.19874	0.533,0.307,0.262	0.542,0.655,0.794	-0.296		unknown protein; Has 30201 Blast hits to 17322 proteins in 780 species: Archae - 12; Bacteria - 1396; Metazoa - 17338; Fungi - 3422; Plants - 5037; Viruses - 0; Other Eukaryotes - 2996 (source: NCBI BLink). [Source:TAIR;Acc:AT5G58790]
A3SS	AT1G05785	1	+	1730921	1731168	1730958	1731168	1730248	1730332	0.00606993	0.200369	0.103,0.061,0.034	0.128,0.317,0.088	-0.112		Got1/Sft2-like vescicle transport protein family [Source:TAIR;Acc:AT1G05785]
A3SS	AT2G42920	2	+	17862320	17862433	17862342	17862433	17862018	17862164	0.00606771	0.200369	0.137,0.0,0.338	0.093,0.048,0.0	0.111	PCMP-E75	Pentatricopeptide repeat-containing protein At2g42920, chloroplastic [Source:UniProtKB/Swiss-Prot;Acc:Q9SJG6]
A3SS	AT4G34140	4	+	16353054	16353162	16353072	16353162	16352764	16352973	0.00610459	0.20126	0.0,0.082,0.0	0.065,0.264,0.101	-0.116		D111/G-patch domain-containing protein [Source:TAIR;Acc:AT4G34140]
A3SS	AT1G53380	1	-	19915841	19916147	19915841	19915952	19916380	19916517	0.0061397	0.201549	0.5,0.733,1.0	0.437,0.5,0.333	0.321		Plant protein of unknown function (DUF641) [Source:TAIR;Acc:AT1G53380]
A3SS	AT1G07560	1	+	2329533	2329694	2329674	2329694	2329338	2329420	0.0061516	0.201549	1.0,1.0,1.0	1.0,0.367,1.0	0.211		Probable LRR receptor-like serine/threonine-protein kinase At1g07560 [Source:UniProtKB/Swiss-Prot;Acc:C0LGD9]
A3SS	AT4G18220	4	+	10078967	10079017	10078972	10079017	10078767	10078798	0.00622476	0.20344	1.0,1.0,1.0	0.951,0.884,0.98	0.062		Drug/metabolite transporter superfamily protein [Source:TAIR;Acc:AT4G18220]
A3SS	AT5G05540	5	+	1636992	1637066	1636997	1637066	1636826	1636907	0.00625602	0.203791	0.041,0.037,0.075	0.124,0.096,0.163	-0.077	SDN2	Small RNA degrading nuclease 2 [Source:UniProtKB/Swiss-Prot;Acc:Q9FFG1]
A3SS	AT5G02940	5	-	687200	687285	687200	687280	687390	687495	0.00624408	0.203791	0.128,0.205,0.109	0.204,0.313,0.225	-0.1		Putative ion channel POLLUX-like 1 [Source:UniProtKB/Swiss-Prot;Acc:Q8VZM7]
A3SS	AT5G24320	5	-	8286214	8286338	8286214	8286305	8286547	8287682	0.00625871	0.203791	0.03,0.053,0.057	0.105,0.105,0.146	-0.072		Transducin/WD40 repeat-like superfamily protein [Source:TAIR;Acc:AT5G24320]
A3SS	AT1G14350	1	+	4908254	4908519	4908291	4908519	4907952	4908164	0.00639093	0.207583	0.287,0.0,0.0	0.0,0.168,0.315	-0.065	FLP	Duplicated homeodomain-like superfamily protein [Source:TAIR;Acc:AT1G14350]
A3SS	AT4G22970	4	-	12035459	12035700	12035459	12035691	12035772	12036002	0.00641201	0.208011	0.0,0.0,0.559	0.613,0.487,1.0	-0.514	ESP1	Separase [Source:UniProtKB/Swiss-Prot;Acc:Q5IBC5]
A3SS	AT1G08840	1	-	2833491	2833626	2833491	2833622	2834016	2834073	0.00645734	0.208967	1.0,1.0,0.898	0.632,0.898,1.0	0.123	emb2411	DNA replication helicase, putative [Source:TAIR;Acc:AT1G08840]
A3SS	AT5G55100	5	-	22363905	22363957	22363905	22363941	22364074	22364235	0.00650531	0.21017	0.645,0.185,1.0	1.0,1.0,0.476	-0.215		SWAP (Suppressor-of-White-APricot)/surp domain-containing protein [Source:TAIR;Acc:AT5G55100]
A3SS	AT1G29060	1	+	10148041	10148165	10148070	10148165	10147692	10147918	0.00653823	0.210808	0.938,0.916,0.937	0.94,0.782,0.808	0.087		Bet1-like protein At1g29060 [Source:UniProtKB/Swiss-Prot;Acc:Q8L9S0]
A3SS	AT3G13090	3	-	4203213	4203453	4203213	4203449	4203537	4203601	0.00667241	0.214609	1.0,1.0,0.975	0.907,1.0,0.44	0.209	ABCC6	ABC transporter C family member 6 [Source:UniProtKB/Swiss-Prot;Acc:Q8VZZ4]
A3SS	AT3G12520	3	-	3971069	3971293	3971069	3971271	3971375	3971424	0.00677212	0.217538	0.0,0.0,0.0	0.193,0.074,0.099	-0.122	SULTR4;2	Probable sulfate transporter 4.2 [Source:UniProtKB/Swiss-Prot;Acc:Q8GYH8]
A3SS	AT3G26890	3	-	9908834	9909086	9908834	9909083	9909317	9910792	0.00678824	0.217538	0.829,0.781,0.791	0.692,0.749,0.698	0.087		unknown protein; BEST Arabidopsis thaliana protein match is: unknown protein (TAIR:AT5G41110.1); Has 393 Blast hits to 383 proteins in 134 species: Archae - 0; Bacteria - 61; Metazoa - 171; Fungi - 74; Plants - 80; Viruses - 0; Other Eukaryotes - 7 /.../e: NCBI BLink). [Source:TAIR;Acc:AT3G26890]
A3SS	AT3G51310	3	-	19048540	19048732	19048540	19048706	19048816	19048940	0.0068413	0.218971	1.0,1.0,1.0	0.784,0.928,0.911	0.126	VPS35C	Vacuolar protein sorting-associated protein 35C [Source:UniProtKB/Swiss-Prot;Acc:A8R7K9]
A3SS	AT4G08180	4	+	5171994	5172162	5171999	5172162	5171751	5171907	0.00690092	0.220612	0.913,1.0,0.949	0.895,0.86,0.918	0.063	ORP1C	Oxysterol-binding protein-related protein 1C [Source:UniProtKB/Swiss-Prot;Acc:Q8L751]
A3SS	AT5G65210	5	+	26058541	26058659	26058594	26058659	26057622	26058053	0.0069104	0.220647	1.0,1.0,1.0	1.0,0.712,0.65	0.213	TGA1	Transcription factor TGA1 [Source:UniProtKB/Swiss-Prot;Acc:Q39237]
A3SS	AT4G09680	4	+	6121464	6121567	6121474	6121567	6121178	6121395	0.00694545	0.221267	1.0,0.923,0.98	0.944,0.926,0.811	0.074	CTC1	conserved telomere maintenance component 1 [Source:TAIR;Acc:AT4G09680]
A3SS	AT4G32650	4	-	15752275	15752464	15752275	15752457	15752561	15752611	0.00696341	0.221267	0.932,0.915,1.0	1.0,1.0,1.0	-0.051	KAT3	Potassium channel KAT3 [Source:UniProtKB/Swiss-Prot;Acc:P92960]
A3SS	AT3G61010	3	-	22573154	22573290	22573154	22573245	22573405	22573458	0.0070083	0.222157	1.0,1.0,1.0	0.772,1.0,1.0	0.076		Ferritin/ribonucleotide reductase-like family protein [Source:TAIR;Acc:AT3G61010]
A3SS	AT1G34150	1	+	12438535	12438692	12438568	12438692	12438333	12438451	0.00700196	0.222157	0.05,0.141,0.0	0.019,0.0,0.0	0.057		Pseudouridine synthase family protein [Source:TAIR;Acc:AT1G34150]
A3SS	AT3G60500	3	+	22354224	22354381	22354232	22354381	22353882	22354116	0.0070714	0.223351	0.489,0.58,0.549	0.583,1.0,1.0	-0.322	CER7	Protein ECERIFERUM 7 [Source:UniProtKB/Swiss-Prot;Acc:Q9M209]
A3SS	AT3G53830	3	+	19941298	19941383	19941308	19941383	19941120	19941192	0.0071268	0.224433	0.934,1.0,1.0	0.956,0.97,0.838	0.057		Regulator of chromosome condensation (RCC1) family protein [Source:TAIR;Acc:AT3G53830]
A3SS	AT3G09660	3	-	2962332	2962487	2962332	2962478	2962571	2962623	0.00714241	0.224517	0.169,0.137,0.487	0.119,0.0,0.0	0.225	MCM8	minichromosome maintenance 8 [Source:TAIR;Acc:AT3G09660]
A3SS	AT5G42210	5	+	16868387	16868476	16868400	16868476	16868024	16868220	0.00716867	0.224806	0.0,0.0,0.0	0.117,0.0,0.188	-0.102		Major facilitator superfamily protein [Source:TAIR;Acc:AT5G42210]
A3SS	AT5G48545	5	+	19677577	19677604	19677580	19677604	19676960	19677034	0.00722529	0.226043	1.0,0.633,0.874	1.0,0.888,1.0	-0.127	HINT3	histidine triad nucleotide-binding 3 [Source:TAIR;Acc:AT5G48545]
A3SS	AT3G59110	3	+	21856436	21856541	21856443	21856541	21855635	21856343	0.00723478	0.226072	0.972,0.909,0.883	0.991,0.978,0.951	-0.052		Protein kinase superfamily protein [Source:TAIR;Acc:AT3G59110]
A3SS	AT2G42240	2	+	17597953	17598029	17597956	17598029	17597654	17597711	0.00727665	0.226605	0.021,0.02,0.022	0.0,0.091,0.132	-0.053		RNA-binding (RRM/RBD/RNP motifs) family protein [Source:TAIR;Acc:AT2G42240]
A3SS	AT1G13390	1	-	4593394	4593683	4593394	4593558	4594110	4594391	0.00731425	0.227208	0.571,0.542,0.652	0.478,0.456,0.431	0.133		unknown protein; BEST Arabidopsis thaliana protein match is: unknown protein (TAIR:AT1G68490.1); Has 114 Blast hits to 114 proteins in 18 species: Archae - 0; Bacteria - 0; Metazoa - 0; Fungi - 0; Plants - 114; Viruses - 0; Other Eukaryotes - 0 (sou /.../CBI BLink). [Source:TAIR;Acc:AT1G13390]
A3SS	AT5G23150	5	+	7789840	7789971	7789858	7789971	7789538	7789647	0.00733212	0.227494	0.098,0.096,0.31	0.024,0.097,0.06	0.108	HUA2	ENHANCER OF AG-4 protein 2 [Source:UniProtKB/Swiss-Prot;Acc:Q9XER9]
A3SS	AT3G61010	3	-	22573154	22573298	22573154	22573245	22573405	22573458	0.00736982	0.228395	1.0,1.0,1.0	0.792,1.0,1.0	0.069		Ferritin/ribonucleotide reductase-like family protein [Source:TAIR;Acc:AT3G61010]
A3SS	AT4G37970	4	+	17851691	17851845	17851728	17851845	17851392	17851616	0.00738852	0.228437	1.0,0.287,0.763	1.0,1.0,1.0	-0.317	CAD6	Probable cinnamyl alcohol dehydrogenase 6 [Source:UniProtKB/Swiss-Prot;Acc:O65621]
A3SS	AT5G27395	5	-	9673640	9673884	9673640	9673839	9674008	9674256	0.00738106	0.228437	0.652,0.909,0.746	0.698,0.954,1.0	-0.115		Mitochondrial inner membrane translocase complex, subunit Tim44-related protein [Source:TAIR;Acc:AT5G27395]
A3SS	AT1G63770	1	-	23660721	23660838	23660721	23660738	23660980	23660999	0.00739827	0.22847	0.118,0.057,0.643	0.0,0.0,0.057	0.254		Peptidase M1 family protein [Source:TAIR;Acc:AT1G63770]
A3SS	AT2G27530	2	-	11764148	11764364	11764148	11764358	11764565	11764598	0.00741792	0.22858	1.0,0.861,1.0	1.0,0.892,0.664	0.102	RPL10AB	60S ribosomal protein L10a-2 [Source:UniProtKB/Swiss-Prot;Acc:P59230]
A3SS	AT1G10820	1	-	3601915	3601977	3601915	3601971	3602167	3602250	0.00742659	0.22858	0.937,0.763,0.978	0.795,0.821,0.749	0.104		Protein of unknown function (DUF3755) [Source:TAIR;Acc:AT1G10820]
A3SS	AT5G08535	5	+	2762707	2762940	2762709	2762940	2762344	2762517	0.0075162	0.23076	0.093,0.031,0.018	0.118,0.102,0.131	-0.07		D111/G-patch domain-containing protein [Source:TAIR;Acc:AT5G08535]
A3SS	AT3G62310	3	-	23058276	23058514	23058276	23058475	23058773	23059858	0.00751159	0.23076	0.597,1.0,1.0	1.0,1.0,1.0	-0.134		RNA helicase family protein [Source:TAIR;Acc:AT3G62310]
A3SS	AT2G29890	2	+	12746641	12746797	12746654	12746797	12746483	12746572	0.00754537	0.231385	1.0,0.928,1.0	0.753,0.966,1.0	0.07	VLN1	Villin-1 [Source:UniProtKB/Swiss-Prot;Acc:O81643]
A3SS	AT4G24810	4	-	12787900	12788034	12787900	12788011	12788202	12788327	0.00756447	0.231701	0.052,0.0,0.173	0.0,0.0,0.0	0.075		Protein kinase superfamily protein [Source:TAIR;Acc:AT4G24810]
A3SS	AT5G13480	5	-	4329570	4329634	4329570	4329630	4329948	4330046	0.00761195	0.232345	0.131,0.0,0.113	0.189,0.357,0.101	-0.134	FY	Flowering time control protein FY [Source:UniProtKB/Swiss-Prot;Acc:Q6NLV4]
A3SS	AT4G38380	4	-	17973810	17973971	17973810	17973968	17974043	17974187	0.00760542	0.232345	1.0,0.664,1.0	0.831,1.0,0.53	0.101	DTX45	MATE efflux family protein 3, chloroplastic [Source:UniProtKB/Swiss-Prot;Acc:Q9SVE7]
A3SS	AT5G14100	5	-	4551208	4551288	4551208	4551283	4551371	4551432	0.00764353	0.23277	1.0,1.0,1.0	1.0,0.892,0.907	0.067	ABCI11	ABC transporter I family member 11, chloroplastic [Source:UniProtKB/Swiss-Prot;Acc:Q8LEF6]
A3SS	AT3G48040	3	+	17732971	17733075	17733023	17733075	17732804	17732870	0.00764207	0.23277	0.96,1.0,1.0	0.951,1.0,0.821	0.063	ARAC8	Rac-like GTP-binding protein ARAC8 [Source:UniProtKB/Swiss-Prot;Acc:Q9SU67]
A3SS	AT3G45100	3	+	16505990	16506085	16506004	16506085	16505753	16505895	0.007837	0.23729	0.946,0.965,0.872	0.964,0.971,1.0	-0.051	SETH2	UDP-Glycosyltransferase superfamily protein [Source:TAIR;Acc:AT3G45100]
A3SS	AT4G27040	4	-	13573697	13573849	13573697	13573844	13574030	13574166	0.00785843	0.237666	0.619,0.493,1.0	0.872,1.0,1.0	-0.253	VP22-1	Vacuolar protein sorting-associated protein 22 homolog 1 [Source:UniProtKB/Swiss-Prot;Acc:Q5M759]
A3SS	AT3G44740	3	-	16297173	16297399	16297173	16297317	16297561	16297805	0.00787921	0.237748	0.819,1.0,0.694	0.351,0.776,0.425	0.32		Class II aaRS and biotin synthetases superfamily protein [Source:TAIR;Acc:AT3G44740]
A3SS	AT5G66530	5	-	26555507	26555691	26555507	26555647	26555758	26555859	0.0078717	0.237748	1.0,0.882,0.952	0.865,0.881,0.782	0.102		Galactose mutarotase-like superfamily protein [Source:TAIR;Acc:AT5G66530]
A3SS	AT1G78540	1	-	29541355	29541433	29541355	29541430	29541522	29542023	0.00789389	0.237919	1.0,1.0,1.0	1.0,0.816,1.0	0.061	SHB	SH2 domain protein B [Source:TAIR;Acc:AT1G78540]
A3SS	AT3G49000	3	+	18163690	18163902	18163750	18163902	18163522	18163585	0.00792501	0.238442	0.0,0.061,0.0	0.076,0.07,0.089	-0.058		RNA polymerase III subunit RPC82 family protein [Source:TAIR;Acc:AT3G49000]
A3SS	AT5G51150	5	+	20789777	20789926	20789826	20789926	20789547	20789687	0.0080018	0.239799	0.092,0.081,0.093	0.23,0.112,0.175	-0.084		Mitochondrial import inner membrane translocase subunit Tim17/Tim22/Tim23 family protein [Source:TAIR;Acc:AT5G51150]
A3SS	AT5G51660	5	+	20981887	20982037	20981919	20982037	20981410	20981546	0.00820917	0.245455	0.968,1.0,1.0	0.91,0.925,0.974	0.053	CPSF160	Cleavage and polyadenylation specificity factor subunit 1 [Source:UniProtKB/Swiss-Prot;Acc:Q9FGR0]
A3SS	AT3G18500	3	+	6353469	6353554	6353501	6353554	6353277	6353336	0.00834178	0.249137	0.332,0.394,0.332	0.443,0.571,0.592	-0.183	CCR4-3	Carbon catabolite repressor protein 4 homolog 3 [Source:UniProtKB/Swiss-Prot;Acc:Q9LS39]
A3SS	AT1G08040	1	-	2497929	2498017	2497929	2497998	2498479	2498764	0.00836333	0.249498	0.389,0.182,0.056	0.0,0.116,0.032	0.16		Protein of unknown function (DUF707) [Source:TAIR;Acc:AT1G08040]
A3SS	AT1G30270	1	+	10656087	10656211	10656108	10656211	10655945	10656017	0.00847884	0.251867	1.0,0.861,0.469	0.638,0.595,0.726	0.124	CIPK23	CBL-interacting serine/threonine-protein kinase 23 [Source:UniProtKB/Swiss-Prot;Acc:Q93VD3]
A3SS	AT4G21090	4	-	11258211	11258327	11258211	11258296	11258452	11258588	0.00855449	0.253478	0.848,0.88,1.0	0.915,1.0,0.977	-0.055	MFDX2	Adrenodoxin-like protein 2, mitochondrial [Source:UniProtKB/Swiss-Prot;Acc:Q8S904]
A3SS	AT4G17615	4	+	9817634	9818076	9818016	9818076	9816986	9817220	0.00864008	0.255294	0.984,1.0,0.96	0.915,0.971,0.902	0.052	CBL1	Calcineurin B-like protein 1 [Source:UniProtKB/Swiss-Prot;Acc:O81445]
A3SS	AT3G22810	3	+	8069354	8069465	8069357	8069465	8068515	8068903	0.00864483	0.255294	0.712,1.0,0.767	1.0,0.747,1.0	-0.089		Plant protein of unknown function (DUF828) with plant pleckstrin homology-like region [Source:TAIR;Acc:AT3G22810]
A3SS	AT3G54880	3	-	20337656	20337883	20337656	20337880	20337967	20338005	0.00867429	0.255877	0.209,0.204,0.252	0.193,0.161,0.151	0.053		unknown protein; BEST Arabidopsis thaliana protein match is: unknown protein (TAIR:AT5G25360.2); Has 137 Blast hits to 137 proteins in 19 species: Archae - 0; Bacteria - 0; Metazoa - 0; Fungi - 0; Plants - 136; Viruses - 0; Other Eukaryotes - 1 (sou /.../CBI BLink). [Source:TAIR;Acc:AT3G54880]
A3SS	AT4G27490	4	+	13739922	13740099	13739951	13740099	13739805	13739835	0.00880258	0.259079	1.0,1.0,0.808	0.946,0.797,0.716	0.116		3'-5'-exoribonuclease family protein [Source:TAIR;Acc:AT4G27490]
A3SS	AT1G02840	1	+	628934	629321	629287	629321	628245	628469	0.00881233	0.259079	0.25,0.212,0.229	0.262,0.304,0.297	-0.057	SR34	Serine/arginine-rich-splicing factor SR34 [Source:UniProtKB/Swiss-Prot;Acc:O22315]
A3SS	AT1G22740	1	+	8049980	8050061	8049985	8050061	8049793	8049884	0.00884517	0.259465	0.892,0.954,0.836	0.933,0.993,0.948	-0.064	RABG3B	Ras-related protein RABG3b [Source:UniProtKB/Swiss-Prot;Acc:O04157]
A3SS	AT4G17330	4	-	9697326	9697419	9697326	9697416	9697560	9697578	0.00889406	0.260609	1.0,0.831,1.0	0.831,0.747,0.747	0.169	ATG2484-1	G2484-1 protein [Source:TAIR;Acc:AT4G17330]
A3SS	AT3G28080	3	+	10452014	10452133	10452019	10452133	10451837	10451903	0.0089555	0.260983	0.196,0.075,0.0	0.0,0.057,0.0	0.071		WAT1-related protein At3g28080 [Source:UniProtKB/Swiss-Prot;Acc:F4IYZ0]
A3SS	AT1G80790	1	+	30361263	30361447	30361264	30361447	30360266	30361180	0.0089203	0.260983	0.429,0.25,0.0	0.077,0.0,0.0	0.201	FDM5	Factor of DNA methylation 5 [Source:UniProtKB/Swiss-Prot;Acc:Q9SAI1]
A3SS	AT1G69340	1	+	26067882	26067947	26067904	26067947	26067707	26067801	0.00893521	0.260983	0.127,1.0,0.26	0.687,0.724,0.906	-0.31		appr-1-p processing enzyme family protein [Source:TAIR;Acc:AT1G69340]
A3SS	AT2G31580	2	-	13443340	13443549	13443340	13443448	13443631	13443717	0.0089437	0.260983	0.061,0.041,0.101	0.0,0.02,0.028	0.052	THG1	tRNA(His) guanylyltransferase 1 [Source:UniProtKB/Swiss-Prot;Acc:F4IRQ5]
A3SS	AT1G05870	1	-	1772096	1772163	1772096	1772138	1772308	1772533	0.00895706	0.260983	1.0,0.633,1.0	0.775,0.392,1.0	0.155		Protein of unknown function (DUF1685) [Source:TAIR;Acc:AT1G05870]
A3SS	AT2G32700	2	+	13867128	13867266	13867192	13867266	13866771	13866926	0.00896628	0.260983	0.06,0.0,0.319	0.26,0.26,0.484	-0.208	LUH	LEUNIG_homolog [Source:TAIR;Acc:AT2G32700]
A3SS	AT4G09680	4	+	6120986	6121090	6120998	6121090	6120376	6120922	0.00899983	0.261382	0.0,0.0,0.0	0.137,0.0,0.022	-0.053	CTC1	conserved telomere maintenance component 1 [Source:TAIR;Acc:AT4G09680]
A3SS	AT1G11870	1	+	4004169	4004321	4004175	4004321	4003845	4004099	0.00899792	0.261382	0.932,0.892,0.861	0.829,0.815,0.744	0.099	ATSRS	Seryl-tRNA synthetase [Source:TAIR;Acc:AT1G11870]
A3SS	AT1G76570	1	+	28729686	28729840	28729693	28729840	28729358	28729525	0.00902411	0.261691	0.054,0.141,0.104	0.038,0.069,0.0	0.064		Chlorophyll A-B binding family protein [Source:TAIR;Acc:AT1G76570]
A3SS	AT5G44580	5	+	17979519	17979706	17979542	17979706	17979310	17979444	0.00903035	0.261691	0.401,0.142,0.142	0.374,0.428,0.477	-0.198		unknown protein; FUNCTIONS IN: molecular_function unknown; INVOLVED IN: biological_process unknown; LOCATED IN: endomembrane system; EXPRESSED IN: 18 plant structures; EXPRESSED DURING: 12 growth stages; BEST Arabidopsis thaliana protein match is: u /.../ protein (TAIR:AT5G44582.1); Has 30201 Blast hits to 17322 proteins in 780 species: Archae - 12; Bacteria - 1396; Metazoa - 17338; Fungi - 3422;…
A3SS	AT3G60286	3	-	22281740	22281990	22281740	22281987	22282179	22282248	0.00907463	0.262397	1.0,1.0,1.0	1.0,0.283,1.0	0.239		unknown protein; Has 30201 Blast hits to 17322 proteins in 780 species: Archae - 12; Bacteria - 1396; Metazoa - 17338; Fungi - 3422; Plants - 5037; Viruses - 0; Other Eukaryotes - 2996 (source: NCBI BLink). [Source:TAIR;Acc:AT3G60286]
A3SS	AT1G58180	1	-	21538298	21538396	21538298	21538393	21538482	21538555	0.00915077	0.263634	0.783,0.731,0.874	0.712,0.94,1.0	-0.088	BCA6	Beta carbonic anhydrase 6, mitochondrial [Source:UniProtKB/Swiss-Prot;Acc:Q9C6F5]
A3SS	AT5G18640	5	+	6213926	6213984	6213936	6213984	6213766	6213832	0.00922221	0.264486	0.077,0.051,0.102	0.16,0.095,0.132	-0.052		alpha/beta-Hydrolases superfamily protein [Source:TAIR;Acc:AT5G18640]
A3SS	AT1G26440	1	-	9144994	9145195	9144994	9145114	9145300	9145340	0.00922719	0.264486	1.0,0.945,1.0	0.948,0.911,0.907	0.06	UPS5	Ureide permease 5 [Source:UniProtKB/Swiss-Prot;Acc:Q93Z75]
A3SS	AT5G64600	5	+	25826783	25826920	25826786	25826920	25826323	25826452	0.00921684	0.264486	0.862,0.944,0.937	1.0,1.0,1.0	-0.086		O-fucosyltransferase family protein [Source:TAIR;Acc:AT5G64600]
A3SS	AT5G13650	5	+	4398234	4398340	4398237	4398340	4397745	4398028	0.00940384	0.268672	0.826,0.777,0.755	0.682,0.781,0.71	0.062		elongation factor family protein [Source:TAIR;Acc:AT5G13650]
A3SS	AT1G15240	1	+	5246931	5247118	5246956	5247118	5246323	5246468	0.00942934	0.269109	0.535,0.689,0.564	1.0,0.683,0.775	-0.223		Phox-associated domain;Phox-like;Sorting nexin, C-terminal [Source:TAIR;Acc:AT1G15240]
A3SS	AT2G34770	2	+	14666766	14666829	14666787	14666829	14665666	14665890	0.0096203	0.273669	0.91,0.758,0.896	0.895,0.957,0.988	-0.092	FAH1	Fatty acid 2-hydroxylase 1 [Source:UniProtKB/Swiss-Prot;Acc:O48916]
A3SS	AT3G05570	3	-	1616462	1616671	1616462	1616648	1617285	1617339	0.00965691	0.274327	0.093,0.017,0.0	0.103,0.083,0.107	-0.061		unknown protein; BEST Arabidopsis thaliana protein match is: unknown protein (TAIR:AT4G39235.1); Has 73 Blast hits to 73 proteins in 11 species: Archae - 0; Bacteria - 0; Metazoa - 0; Fungi - 0; Plants - 73; Viruses - 0; Other Eukaryotes - 0 (source /.../ BLink). [Source:TAIR;Acc:AT3G05570]
A3SS	AT3G04630	3	+	1259569	1259661	1259572	1259661	1259226	1259461	0.00966795	0.274327	0.874,0.919,0.982	0.989,0.955,1.0	-0.056	WDL1	Protein WVD2-like 1 [Source:UniProtKB/Swiss-Prot;Acc:Q8GYX9]
A3SS	AT4G12790	4	-	7518847	7518918	7518847	7518913	7519325	7519422	0.00968505	0.274327	1.0,0.872,1.0	0.369,1.0,1.0	0.168		P-loop containing nucleoside triphosphate hydrolases superfamily protein [Source:TAIR;Acc:AT4G12790]
A3SS	AT3G60070	3	-	22185633	22185703	22185633	22185695	22185786	22185952	0.00974096	0.275023	1.0,1.0,0.972	0.859,0.956,0.976	0.06		Major facilitator superfamily protein [Source:TAIR;Acc:AT3G60070]
A3SS	AT2G27790	2	-	11848912	11848993	11848912	11848973	11849063	11849296	0.00973991	0.275023	0.949,0.93,1.0	0.751,1.0,0.883	0.082		RNA-binding (RRM/RBD/RNP motifs) family protein [Source:TAIR;Acc:AT2G27790]
A3SS	AT2G03060	2	+	902157	902227	902162	902227	901901	902069	0.00973185	0.275023	0.0,0.0,0.231	0.039,0.154,0.404	-0.122	AGL30	AGAMOUS-like 30 [Source:TAIR;Acc:AT2G03060]
A3SS	AT1G72640	1	-	27347393	27347498	27347393	27347489	27347584	27347661	0.00987658	0.277661	0.216,0.189,0.184	0.28,0.247,0.277	-0.072		NAD(P)-binding Rossmann-fold superfamily protein [Source:TAIR;Acc:AT1G72640]
A3SS	AT3G20070	3	-	7005257	7005426	7005257	7005423	7005545	7005763	0.00992831	0.278818	1.0,1.0,1.0	1.0,0.874,0.888	0.079	TTN9	titan9 [Source:TAIR;Acc:AT3G20070]
A3SS	AT2G34560	2	+	14560665	14560809	14560692	14560809	14560162	14560307	0.00995787	0.279351	0.169,0.19,0.184	0.232,0.211,0.253	-0.051		P-loop containing nucleoside triphosphate hydrolases superfamily protein [Source:TAIR;Acc:AT2G34560]
A3SS	AT1G79380	1	+	29862600	29862714	29862603	29862714	29862356	29862483	0.0100822	0.282075	0.831,0.783,1.0	0.916,1.0,1.0	-0.101		Ca(2)-dependent phospholipid-binding protein (Copine) family [Source:TAIR;Acc:AT1G79380]
A3SS	AT5G58140	5	+	23527011	23527180	23527060	23527180	23526873	23526944	0.0100871	0.282075	0.431,1.0,0.431	0.0,1.0,0.274	0.196	PHOT2	Phototropin-2 [Source:UniProtKB/Swiss-Prot;Acc:P93025]
A3SS	AT5G47900	5	+	19393811	19393903	19393819	19393903	19393605	19393731	0.0100842	0.282075	0.884,0.705,0.728	0.443,0.544,0.626	0.235		Protein of unknown function (DUF1624) [Source:TAIR;Acc:AT5G47900]
A3SS	AT2G39250	2	-	16389601	16389677	16389601	16389674	16389826	16389954	0.0101721	0.284149	1.0,1.0,1.0	1.0,0.53,1.0	0.157	SNZ	AP2-like ethylene-responsive transcription factor SNZ [Source:UniProtKB/Swiss-Prot;Acc:Q6PV67]
A3SS	AT2G45950	2	-	18905228	18905355	18905228	18905320	18905736	18905806	0.0101903	0.284356	0.187,0.267,0.174	0.129,0.05,0.178	0.09	ASK20	SKP1-like protein 20 [Source:UniProtKB/Swiss-Prot;Acc:A8MQG7]
A3SS	AT3G54970	3	-	20368499	20368645	20368499	20368641	20368767	20368853	0.0102105	0.284619	1.0,0.959,1.0	0.971,0.898,0.89	0.067		D-aminoacid aminotransferase-like PLP-dependent enzymes superfamily protein [Source:TAIR;Acc:AT3G54970]
A3SS	AT5G20300	5	-	6856212	6856340	6856212	6856336	6856846	6856977	0.0102635	0.284932	1.0,0.944,0.839	1.0,1.0,0.953	-0.057	TOC90	Translocase of chloroplast 90, chloroplastic [Source:UniProtKB/Swiss-Prot;Acc:Q6S5G3]
A3SS	AT5G05310	5	+	1572220	1572322	1572229	1572322	1572080	1572149	0.0102376	0.284932	0.416,0.0,0.0	0.213,0.275,1.0	-0.357		TLC ATP/ADP transporter [Source:TAIR;Acc:AT5G05310]
A3SS	AT5G08650	5	-	2809639	2809794	2809639	2809790	2810270	2810337	0.010265	0.284932	1.0,0.907,1.0	1.0,0.517,1.0	0.13		Translation factor GUF1 homolog, chloroplastic [Source:UniProtKB/Swiss-Prot;Acc:Q9FNM5]
A3SS	AT3G58510	3	+	21641619	21641740	21641622	21641740	21641434	21641518	0.010246	0.284932	0.831,0.712,1.0	0.773,0.664,0.664	0.147	RH11	DEAD-box ATP-dependent RNA helicase 11 [Source:UniProtKB/Swiss-Prot;Acc:Q8LA13]
A3SS	AT1G77890	1	+	29293400	29293478	29293433	29293478	29293206	29293278	0.0103048	0.285137	0.92,1.0,0.875	1.0,1.0,1.0	-0.068		DNA-directed RNA polymerase II protein [Source:TAIR;Acc:AT1G77890]
A3SS	AT3G62310	3	-	23058276	23058520	23058276	23058402	23058773	23059858	0.0103042	0.285137	0.329,0.296,0.272	0.385,0.401,0.376	-0.088		RNA helicase family protein [Source:TAIR;Acc:AT3G62310]
A3SS	AT3G04970	3	+	1377475	1377577	1377485	1377577	1377321	1377374	0.0103882	0.28684	0.065,0.123,0.031	0.32,0.173,0.105	-0.126	PAT17	Probable protein S-acyltransferase 17 [Source:UniProtKB/Swiss-Prot;Acc:Q3EBC2]
A3SS	AT4G08690	4	-	5552877	5552953	5552877	5552932	5553039	5553151	0.0104631	0.286949	0.398,0.169,0.0	0.0,0.0,0.138	0.143		Sec14p-like phosphatidylinositol transfer family protein [Source:TAIR;Acc:AT4G08690]
A3SS	AT2G03810	2	+	1161525	1161724	1161669	1161724	1161028	1161296	0.0104108	0.286949	0.254,0.093,0.054	0.396,0.0,0.453	-0.149		18S pre-ribosomal assembly protein gar2-related [Source:TAIR;Acc:AT2G03810]
A3SS	AT5G15510	5	+	5035876	5036089	5036029	5036089	5035632	5035731	0.0104388	0.286949	0.0,0.091,0.0	0.0,0.05,0.455	-0.138		TPX2 (targeting protein for Xklp2) protein family [Source:TAIR;Acc:AT5G15510]
A3SS	AT4G25910	4	+	13164314	13164432	13164355	13164432	13163928	13164229	0.0104671	0.286949	0.848,0.92,0.956	0.868,0.84,0.853	0.054	NIFU3	NifU-like protein 3, chloroplastic [Source:UniProtKB/Swiss-Prot;Acc:Q84RQ7]
A3SS	AT1G13350	1	-	4575961	4576047	4575961	4576004	4576238	4576632	0.0105032	0.287306	1.0,1.0,1.0	1.0,1.0,0.796	0.068		Protein kinase superfamily protein [Source:TAIR;Acc:AT1G13350]
A3SS	AT1G05790	1	+	1736354	1736452	1736365	1736452	1736151	1736273	0.0105253	0.287611	0.969,0.98,0.873	1.0,1.0,1.0	-0.059		lipase class 3 family protein [Source:TAIR;Acc:AT1G05790]
A3SS	AT1G50000	1	-	18515543	18515624	18515543	18515597	18515763	18515825	0.0106348	0.289403	0.146,0.46,0.39	0.0,0.0,0.63	0.122		methyltransferases [Source:TAIR;Acc:AT1G50000]
A3SS	AT1G51805	1	-	19223471	19223630	19223471	19223564	19223705	19224184	0.0106237	0.289403	0.885,0.904,0.893	1.0,0.964,1.0	-0.094		Leucine-rich repeat protein kinase family protein [Source:TAIR;Acc:AT1G51805]
A3SS	AT1G51500	1	-	19099455	19099584	19099455	19099577	19099672	19099795	0.0106264	0.289403	1.0,0.965,1.0	0.931,0.847,0.971	0.072	ABCG12	ABC transporter G family member 12 [Source:UniProtKB/Swiss-Prot;Acc:Q9C8K2]
A3SS	AT1G66070	1	-	24596392	24596566	24596392	24596544	24596640	24596788	0.0106463	0.289416	0.226,1.0,1.0	0.127,0.496,0.594	0.336		Translation initiation factor eIF3 subunit [Source:TAIR;Acc:AT1G66070]
A3SS	AT1G73350	1	-	27576430	27576519	27576430	27576479	27576900	27576965	0.0106573	0.289416	0.433,0.344,0.284	0.457,0.503,0.54	-0.146		unknown protein; FUNCTIONS IN: molecular_function unknown; INVOLVED IN: biological_process unknown; LOCATED IN: nucleus; EXPRESSED IN: 25 plant structures; EXPRESSED DURING: 15 growth stages; Has 46 Blast hits to 46 proteins in 19 species: Archae - /.../teria - 0; Metazoa - 3; Fungi - 3; Plants - 36; Viruses - 0; Other Eukaryotes - 4 (source: NCBI BLink). [Source:TAIR;Acc:AT1G73350]
A3SS	AT3G61070	3	-	22606531	22606607	22606531	22606597	22606711	22606878	0.0106821	0.289791	0.825,0.79,0.715	0.872,0.93,0.952	-0.141	PEX11E	Peroxisomal membrane protein 11E [Source:UniProtKB/Swiss-Prot;Acc:Q84JW1]
A3SS	AT5G42765	5	-	17151112	17151342	17151112	17151339	17151433	17151681	0.0107593	0.290828	0.873,0.873,0.947	0.838,0.817,0.863	0.058		INVOLVED IN: biological_process unknown; LOCATED IN: thylakoid, chloroplast thylakoid membrane, chloroplast; EXPRESSED IN: 22 plant structures; EXPRESSED DURING: 13 growth stages; CONTAINS InterPro DOMAIN/s: Twin-arginine translocation pathway, sign /.../uence (InterPro:IPR006311); Has 30201 Blast hits to 17322 proteins in 780 species: Archae - 12; Bacteria - 1396; Metazoa - 17338; Fungi - 3422; …
A3SS	AT3G59340	3	-	21929797	21929877	21929797	21929858	21929951	21930028	0.0107907	0.290941	1.0,1.0,0.572	1.0,1.0,1.0	-0.143		Eukaryotic protein of unknown function (DUF914) [Source:TAIR;Acc:AT3G59340]
A3SS	AT2G02770	2	-	777400	777576	777400	777547	777648	777827	0.0108582	0.292163	0.771,0.883,0.752	0.534,0.791,0.533	0.183		4'-phosphopantetheinyl transferase superfamily [Source:TAIR;Acc:AT2G02770]
A3SS	AT1G64790	1	-	24077154	24077342	24077154	24077319	24077414	24077505	0.0108852	0.292589	1.0,1.0,1.0	1.0,0.428,1.0	0.191	ILA	ILITYHIA [Source:TAIR;Acc:AT1G64790]
A3SS	AT3G15220	3	-	5129455	5129524	5129455	5129520	5129610	5129727	0.0108972	0.292615	0.976,1.0,0.851	0.858,0.924,0.779	0.089		Protein kinase superfamily protein [Source:TAIR;Acc:AT3G15220]
A3SS	AT5G67170	5	+	26800908	26801069	26800919	26801069	26800745	26800830	0.0110248	0.295138	0.0,0.102,0.138	0.131,0.25,0.184	-0.108		SEC-C motif-containing protein / OTU-like cysteine protease family protein [Source:TAIR;Acc:AT5G67170]
A3SS	AT5G16480	5	-	5382113	5382259	5382113	5382207	5382469	5382897	0.0110155	0.295138	0.154,0.192,0.225	0.12,0.11,0.119	0.074		Phosphotyrosine protein phosphatases superfamily protein [Source:TAIR;Acc:AT5G16480]
A3SS	AT1G34150	1	+	12438546	12438692	12438575	12438692	12438333	12438451	0.0111323	0.296808	1.0,1.0,1.0	1.0,0.296,0.808	0.299		Pseudouridine synthase family protein [Source:TAIR;Acc:AT1G34150]
A3SS	AT3G19670	3	-	6832902	6833022	6832902	6833014	6833107	6833177	0.0111634	0.297337	1.0,1.0,1.0	0.978,0.842,1.0	0.06	PRP40B	Pre-mRNA-processing protein 40B [Source:UniProtKB/Swiss-Prot;Acc:F4JCC1]
A3SS	AT5G41080	5	+	16442311	16442477	16442417	16442477	16441743	16442195	0.0112015	0.297449	0.281,0.279,0.363	0.224,0.291,0.223	0.062	GDPD2	Glycerophosphodiester phosphodiesterase GDPD2 [Source:UniProtKB/Swiss-Prot;Acc:Q9FLM1]
A3SS	AT2G25740	2	+	10980564	10980688	10980620	10980688	10980121	10980344	0.0112998	0.299758	0.075,0.0,0.039	0.055,0.111,0.18	-0.077		ATP-dependent protease La (LON) domain protein [Source:TAIR;Acc:AT2G25740]
A3SS	AT2G40090	2	-	16738554	16738773	16738554	16738694	16738975	16739012	0.0113259	0.300147	0.952,0.955,1.0	0.871,0.876,0.967	0.064	ATATH9	Putative ABC1 protein At2g40090 [Source:UniProtKB/Swiss-Prot;Acc:O04212]
A3SS	AT2G40550	2	+	16936731	16936851	16936734	16936851	16936407	16936644	0.0114544	0.30221	0.056,0.074,0.072	0.0,0.038,0.0	0.055	ETG1	Mini-chromosome maintenance complex-binding protein [Source:UniProtKB/Swiss-Prot;Acc:Q501D5]
A3SS	AT2G03480	2	+	1052685	1052914	1052688	1052914	1052327	1052568	0.0114472	0.30221	0.0,0.0,0.0	0.041,0.141,0.02	-0.067	QUL2	Probable methyltransferase PMT5 [Source:UniProtKB/Swiss-Prot;Acc:Q3EC77]
A3SS	AT3G50050	3	-	18555861	18556035	18555861	18556018	18556130	18556558	0.0114564	0.30221	0.107,0.516,0.37	0.635,0.457,0.851	-0.317		Eukaryotic aspartyl protease family protein [Source:TAIR;Acc:AT3G50050]
A3SS	AT2G03667	2	+	1115631	1115705	1115642	1115705	1115309	1115558	0.0115348	0.302792	0.775,0.738,0.69	0.621,0.458,0.567	0.186		Asparagine synthase family protein [Source:TAIR;Acc:AT2G03667]
A3SS	AT1G05570	1	-	1653621	1653733	1653621	1653727	1653822	1653917	0.0115098	0.302792	0.563,0.492,0.727	0.195,0.326,0.326	0.312	CALS1	Callose synthase 1 [Source:UniProtKB/Swiss-Prot;Acc:Q9AUE0]
A3SS	AT5G04370	5	+	1233115	1233373	1233125	1233373	1232612	1233008	0.0115287	0.302792	1.0,1.0,1.0	0.739,1.0,1.0	0.087	NAMT1	S-adenosyl-L-methionine-dependent methyltransferases superfamily protein [Source:TAIR;Acc:AT5G04370]
A3SS	AT1G04280	1	-	1146140	1146374	1146140	1146371	1146522	1146654	0.0115406	0.302792	0.763,0.949,0.872	0.933,0.911,0.943	-0.068		P-loop containing nucleoside triphosphate hydrolases superfamily protein [Source:TAIR;Acc:AT1G04280]
A3SS	AT5G19740	5	+	6675291	6675363	6675296	6675363	6675114	6675196	0.0115893	0.303767	0.872,0.661,1.0	0.493,1.0,0.163	0.292		Peptidase M28 family protein [Source:TAIR;Acc:AT5G19740]
A3SS	AT3G02510	3	-	523226	523308	523226	523302	523385	523501	0.0116448	0.304312	0.492,0.492,0.326	1.0,0.244,1.0	-0.311		Regulator of chromosome condensation (RCC1) family protein [Source:TAIR;Acc:AT3G02510]
A3SS	AT4G31800	4	+	15384279	15384411	15384298	15384411	15383815	15384202	0.0116346	0.304312	0.572,0.308,0.899	0.472,1.0,0.472	-0.055	WRKY18	WRKY transcription factor 18 [Source:UniProtKB/Swiss-Prot;Acc:Q9C5T4]
A3SS	AT1G70590	1	+	26619047	26619267	26619133	26619267	26618320	26618961	0.0117164	0.304989	0.158,0.107,0.167	0.065,0.115,0.047	0.068		F-box protein At1g70590 [Source:UniProtKB/Swiss-Prot;Acc:Q94C27]
A3SS	AT1G29030	1	-	10130905	10131128	10130905	10130971	10131777	10131927	0.0117286	0.304989	0.0,0.182,0.5	0.0,0.0,0.0	0.227		Apoptosis inhibitory protein 5 (API5) [Source:TAIR;Acc:AT1G29030]
A3SS	AT1G36070	1	-	13469097	13469172	13469097	13469138	13469913	13470003	0.0117181	0.304989	0.247,0.149,0.29	0.0,0.069,0.083	0.178		Transducin/WD40 repeat-like superfamily protein [Source:TAIR;Acc:AT1G36070]
A3SS	AT5G53010	5	-	21490153	21490347	21490153	21490300	21490445	21490544	0.0117148	0.304989	0.379,0.337,0.396	0.323,0.078,0.125	0.195		calcium-transporting ATPase, putative [Source:TAIR;Acc:AT5G53010]
A3SS	AT4G26180	4	-	13260977	13261105	13260977	13261100	13261185	13261393	0.0117644	0.305318	0.369,0.52,0.394	0.294,0.089,0.196	0.235		Mitochondrial substrate carrier family protein [Source:TAIR;Acc:AT4G26180]
A3SS	AT2G36010	2	+	15121389	15121448	15121395	15121448	15121239	15121291	0.011798	0.305618	0.744,0.914,1.0	0.744,0.744,0.659	0.17	E2FA	Transcription factor E2FA [Source:UniProtKB/Swiss-Prot;Acc:Q9FNY0]
A3SS	AT3G23255	3	+	8312195	8312391	8312354	8312391	8311965	8312086	0.011856	0.306188	1.0,1.0,1.0	1.0,0.478,1.0	0.174		unknown protein; FUNCTIONS IN: molecular_function unknown; INVOLVED IN: biological_process unknown; LOCATED IN: cellular_component unknown; Has 52 Blast hits to 52 proteins in 25 species: Archae - 0; Bacteria - 0; Metazoa - 10; Fungi - 0; Plants - 3 /.../uses - 0; Other Eukaryotes - 4 (source: NCBI BLink). [Source:TAIR;Acc:AT3G23255]
A3SS	AT3G01050	3	+	14559	14675	14564	14675	14324	14489	0.0119257	0.306783	1.0,0.394,1.0	0.493,0.493,0.0	0.469	MUB1	Membrane-anchored ubiquitin-fold protein 1 [Source:UniProtKB/Swiss-Prot;Acc:Q9MAB9]
A3SS	AT1G53780	1	-	20077441	20077536	20077441	20077524	20077615	20077745	0.0119251	0.306783	1.0,1.0,1.0	0.368,1.0,1.0	0.211	RPT1B	peptidyl-prolyl cis-trans isomerases;hydrolases;nucleoside-triphosphatases;ATP binding;nucleotide binding;ATPases [Source:TAIR;Acc:AT1G53780]
A3SS	AT5G66380	5	-	26514292	26514407	26514292	26514404	26514549	26514623	0.0119535	0.306899	0.056,0.137,0.038	0.138,0.258,0.141	-0.102	FOLT1	Folate transporter 1, chloroplastic [Source:UniProtKB/Swiss-Prot;Acc:Q7XA87]
A3SS	AT3G45290	3	+	16619544	16619633	16619554	16619633	16619390	16619451	0.0120331	0.308643	0.943,1.0,0.762	1.0,1.0,0.971	-0.089	MLO3	MLO-like protein 3 [Source:UniProtKB/Swiss-Prot;Acc:Q94KB9]
A3SS	AT5G19620	5	+	6624123	6624217	6624127	6624217	6623203	6624030	0.0121206	0.30968	0.922,0.896,0.87	0.754,0.878,0.787	0.09	OEP80	Outer envelope protein 80, chloroplastic [Source:UniProtKB/Swiss-Prot;Acc:Q9C5J8]
A3SS	AT5G08130	5	-	2609301	2609403	2609301	2609354	2609534	2610250	0.0121134	0.30968	0.551,0.642,0.558	0.379,0.443,0.312	0.206	BIM1	Transcription factor BIM1 [Source:UniProtKB/Swiss-Prot;Acc:Q9LEZ3]
A3SS	AT2G25530	2	+	10864865	10864976	10864912	10864976	10864348	10864606	0.01222	0.311315	0.905,1.0,0.65	0.968,0.913,1.0	-0.109		AFG1-like ATPase family protein [Source:TAIR;Acc:AT2G25530]
A3SS	AT5G06220	5	+	1883931	1883998	1883934	1883998	1883709	1883813	0.0122159	0.311315	0.728,0.784,0.705	0.683,0.699,0.574	0.087		LETM1-like protein [Source:TAIR;Acc:AT5G06220]
A3SS	AT2G13650	2	-	5689496	5689606	5689496	5689561	5689953	5690317	0.0123226	0.312819	0.755,0.481,0.673	0.607,1.0,0.861	-0.186	GONST1	GDP-mannose transporter GONST1 [Source:UniProtKB/Swiss-Prot;Acc:Q941R4]
A3SS	AT2G44980	2	-	18556153	18556319	18556153	18556240	18556446	18556669	0.0123076	0.312819	1.0,0.0,0.0	0.116,0.0,0.0	0.295		SNF2 domain-containing protein / helicase domain-containing protein [Source:TAIR;Acc:AT2G44980]
A3SS	AT3G03040	3	+	685712	685853	685777	685853	684679	685617	0.0123266	0.312819	0.638,0.791,0.661	0.778,0.76,0.914	-0.121		F-box protein At3g03040 [Source:UniProtKB/Swiss-Prot;Acc:Q9LDJ9]
A3SS	AT5G65960	5	+	26386319	26386552	26386432	26386552	26385915	26386243	0.0123588	0.313335	0.55,0.741,0.618	0.507,0.386,0.222	0.265		GTP binding [Source:TAIR;Acc:AT5G65960]
A3SS	AT1G09140	1	-	2943168	2943564	2943168	2943226	2944168	2944246	0.0123917	0.313867	0.296,0.38,0.292	0.352,0.506,0.418	-0.103	SR30	Serine/arginine-rich splicing factor SR30 [Source:UniProtKB/Swiss-Prot;Acc:Q9XFR5]
A3SS	AT3G28030	3	+	10426230	10426308	10426234	10426308	10425794	10425921	0.0124285	0.314196	0.632,0.735,0.567	1.0,0.797,0.797	-0.22	UVH3	DNA repair protein UVH3 [Source:UniProtKB/Swiss-Prot;Acc:Q9ATY5]
A3SS	AT2G35620	2	-	14964543	14964772	14964543	14964745	14965245	14965497	0.0124222	0.314196	0.778,0.639,0.694	0.872,0.949,0.736	-0.149	FEI2	LRR receptor-like serine/threonine-protein kinase FEI 2 [Source:UniProtKB/Swiss-Prot;Acc:C0LGL9]
A3SS	AT3G17430	3	+	5966472	5966689	5966533	5966689	5965922	5966120	0.0124686	0.314907	0.817,0.887,0.865	0.931,1.0,0.937	-0.1		Probable sugar phosphate/phosphate translocator At3g17430 [Source:UniProtKB/Swiss-Prot;Acc:Q9LRP2]
A3SS	AT1G08030	1	-	2492686	2492763	2492686	2492760	2493005	2493250	0.0125065	0.315562	0.706,0.615,0.691	0.831,0.768,0.801	-0.129	TPST	Protein-tyrosine sulfotransferase [Source:UniProtKB/Swiss-Prot;Acc:Q3EDG5]
A3SS	AT1G19010	1	+	6565865	6566045	6565868	6566045	6565493	6565630	0.0125478	0.3163	0.0,0.0,0.099	0.12,0.032,0.171	-0.075		unknown protein; BEST Arabidopsis thaliana protein match is: unknown protein (TAIR:AT1G74860.1); Has 337 Blast hits to 320 proteins in 97 species: Archae - 0; Bacteria - 14; Metazoa - 153; Fungi - 26; Plants - 76; Viruses - 0; Other Eukaryotes - 68 /.../e: NCBI BLink). [Source:TAIR;Acc:AT1G19010]
A3SS	AT3G20150	3	+	7035324	7035417	7035328	7035417	7035142	7035238	0.0125983	0.31727	0.932,1.0,1.0	0.927,0.903,0.774	0.109		Kinesin motor family protein [Source:TAIR;Acc:AT3G20150]
A3SS	AT4G32820	4	-	15833132	15833356	15833132	15833337	15833769	15833950	0.0126365	0.317929	1.0,0.94,1.0	1.0,0.871,0.908	0.054		Tetratricopeptide repeat (TPR)-like superfamily protein [Source:TAIR;Acc:AT4G32820]
A3SS	AT2G25530	2	+	10865527	10865690	10865532	10865690	10865325	10865447	0.0126492	0.317943	0.83,1.0,0.86	1.0,0.959,1.0	-0.09		AFG1-like ATPase family protein [Source:TAIR;Acc:AT2G25530]
A3SS	AT3G48380	3	+	17917700	17917788	17917707	17917788	17917333	17917602	0.0127027	0.318681	0.824,0.852,0.848	0.781,0.746,0.716	0.094		Probable Ufm1-specific protease [Source:UniProtKB/Swiss-Prot;Acc:Q9STL8]
A3SS	AT2G47900	2	-	19612023	19612159	19612023	19612156	19612246	19612323	0.0127347	0.319179	0.172,0.336,0.259	0.175,0.133,0.195	0.088	TULP3	Tubby-like F-box protein 3 [Source:UniProtKB/Swiss-Prot;Acc:Q8VY21]
A3SS	AT1G69480	1	-	26115972	26116102	26115972	26116094	26116184	26116256	0.0128189	0.320049	0.323,1.0,0.741	0.489,0.448,0.549	0.193	PHO1-H10	Phosphate transporter PHO1 homolog 10 [Source:UniProtKB/Swiss-Prot;Acc:Q6R8G0]
A3SS	AT3G27610	3	-	10226729	10226829	10226729	10226826	10226928	10227085	0.0128302	0.320049	0.401,0.257,0.305	0.162,0.252,0.147	0.134		Nucleotidylyl transferase superfamily protein [Source:TAIR;Acc:AT3G27610]
A3SS	AT5G57300	5	-	23210517	23210660	23210517	23210654	23210874	23210955	0.0127822	0.320049	1.0,1.0,1.0	0.744,0.659,1.0	0.199	COQ5	2-methoxy-6-polyprenyl-1,4-benzoquinol methylase, mitochondrial [Source:UniProtKB/Swiss-Prot;Acc:Q9LVC8]
A3SS	AT3G54750	3	-	20268371	20268471	20268371	20268453	20268650	20268881	0.0128285	0.320049	0.822,0.851,0.777	0.739,0.609,0.722	0.127		unknown protein; Has 145 Blast hits to 145 proteins in 60 species: Archae - 0; Bacteria - 0; Metazoa - 99; Fungi - 0; Plants - 40; Viruses - 0; Other Eukaryotes - 6 (source: NCBI BLink). [Source:TAIR;Acc:AT3G54750]
A3SS	AT5G10630	5	+	3361138	3361303	3361153	3361303	3360756	3360921	0.0127977	0.320049	0.0,0.139,0.0	0.143,0.314,0.289	-0.202		Translation elongation factor EF1A/initiation factor IF2gamma family protein [Source:TAIR;Acc:AT5G10630]
A3SS	AT5G57240	5	+	23193320	23193556	23193432	23193556	23193162	23193316	0.0128726	0.320804	0.31,0.343,0.259	0.359,0.447,0.473	-0.122	ORP4C	Oxysterol-binding protein-related protein 4C [Source:UniProtKB/Swiss-Prot;Acc:Q9LVD4]
A3SS	AT4G23430	4	+	12231124	12231198	12231136	12231198	12230921	12231005	0.0129038	0.321047	1.0,0.947,1.0	0.929,1.0,0.817	0.067	TIC32	Short-chain dehydrogenase TIC 32, chloroplastic [Source:UniProtKB/Swiss-Prot;Acc:A2RVM0]
A3SS	AT4G28550	4	+	14111754	14111954	14111761	14111954	14111566	14111670	0.0130243	0.32245	0.948,0.924,1.0	0.922,0.891,0.877	0.061		Ypt/Rab-GAP domain of gyp1p superfamily protein [Source:TAIR;Acc:AT4G28550]
A3SS	AT4G37010	4	+	17444347	17444541	17444411	17444541	17444308	17444317	0.0129963	0.32245	0.158,0.091,0.096	0.136,0.233,0.302	-0.109	CML19	Calcium-binding protein CML19 [Source:UniProtKB/Swiss-Prot;Acc:O23184]
A3SS	AT2G37520	2	-	15748871	15748938	15748871	15748934	15749021	15750107	0.0130789	0.323423	0.329,0.329,0.219	0.495,0.662,0.662	-0.314		Acyl-CoA N-acyltransferase with RING/FYVE/PHD-type zinc finger domain [Source:TAIR;Acc:AT2G37520]
A3SS	AT1G77800	1	+	29256441	29256515	29256447	29256515	29256137	29256234	0.0130882	0.323423	1.0,1.0,0.897	0.708,1.0,1.0	0.063		PHD finger family protein [Source:TAIR;Acc:AT1G77800]
A3SS	AT4G14760	4	+	8475613	8475817	8475621	8475817	8475456	8475530	0.0132271	0.32594	0.961,0.959,0.984	0.959,0.874,0.913	0.053	NET1B	Protein NETWORKED 1B [Source:UniProtKB/Swiss-Prot;Acc:F4JIF4]
A3SS	AT1G07780	1	-	2411823	2412219	2411823	2411929	2412609	2412677	0.013218	0.32594	0.704,0.636,0.643	0.816,0.913,0.833	-0.193	PAI1	N-(5'-phosphoribosyl)anthranilate isomerase 1, chloroplastic [Source:UniProtKB/Swiss-Prot;Acc:Q42440]
A3SS	AT1G28260	1	-	9878731	9879174	9878731	9878851	9879212	9879267	0.0132717	0.326427	0.455,0.395,0.396	0.212,0.284,0.287	0.154	SMG7L	Protein SMG7L [Source:UniProtKB/Swiss-Prot;Acc:Q9FZ99]
A3SS	AT5G62575	5	+	25117686	25117755	25117689	25117755	25117487	25117601	0.0132873	0.326506	0.753,0.688,0.675	0.616,0.566,0.659	0.092	SDH7B	Succinate dehydrogenase subunit 7B, mitochondrial [Source:UniProtKB/Swiss-Prot;Acc:Q3E870]
A3SS	AT1G23020	1	-	8152669	8152857	8152669	8152850	8152967	8153070	0.0133026	0.326549	1.0,0.638,1.0	1.0,1.0,1.0	-0.121	FRO3	Ferric reduction oxidase 3, mitochondrial [Source:UniProtKB/Swiss-Prot;Acc:F4I4K7]
A3SS	AT5G49710	5	+	20196131	20196317	20196163	20196317	20195990	20196081	0.0133903	0.32751	0.598,0.623,1.0	0.345,0.332,0.57	0.325		unknown protein; BEST Arabidopsis thaliana protein match is: unknown protein (TAIR:AT4G24590.1); Has 35333 Blast hits to 34131 proteins in 2444 species: Archae - 798; Bacteria - 22429; Metazoa - 974; Fungi - 991; Plants - 531; Viruses - 0; Other Euk /.../s - 9610 (source: NCBI BLink). [Source:TAIR;Acc:AT5G49710]
A3SS	AT3G14860	3	-	4999864	5000035	4999864	5000031	5000310	5000478	0.013379	0.32751	0.92,0.971,0.948	0.937,0.867,0.876	0.053		NHL domain-containing protein [Source:TAIR;Acc:AT3G14860]
A3SS	AT5G58100	5	+	23513475	23513649	23513478	23513649	23512722	23512898	0.013445	0.328541	1.0,0.681,1.0	1.0,1.0,1.0	-0.106		unknown protein; INVOLVED IN: pollen exine formation; EXPRESSED IN: 19 plant structures; EXPRESSED DURING: 8 growth stages; BEST Arabidopsis thaliana protein match is: unknown protein (TAIR:AT3G28720.1); Has 35333 Blast hits to 34131 proteins in 244 /.../ies: Archae - 798; Bacteria - 22429; Metazoa - 974; Fungi - 991; Plants - 531; Viruses - 0; Other Eukaryotes - 9610 (source: NCBI BLink). [Sourc…
A3SS	AT4G14385	4	-	8287378	8287616	8287378	8287430	8288078	8288148	0.0134798	0.328782	1.0,1.0,0.778	1.0,1.0,0.556	0.074		FUNCTIONS IN: molecular_function unknown; INVOLVED IN: biological_process unknown; LOCATED IN: vacuole; EXPRESSED IN: 24 plant structures; EXPRESSED DURING: 15 growth stages; CONTAINS InterPro DOMAIN/s: Histone H4 acetyltransferase, NuA4 complex, Ea /.../terPro:IPR015418); Has 30201 Blast hits to 17322 proteins in 780 species: Archae - 12; Bacteria - 1396; Metazoa - 17338; Fungi - 3422; Plants - …
A3SS	AT4G23895	4	+	12423090	12423201	12423095	12423201	12422855	12423010	0.0134742	0.328782	0.453,0.35,0.54	0.229,0.409,0.239	0.155		Pleckstrin homology (PH) domain-containing protein [Source:TAIR;Acc:AT4G23895]
A3SS	AT4G26640	4	-	13439317	13439473	13439317	13439469	13439762	13439807	0.0135966	0.330906	0.782,1.0,1.0	0.746,0.761,1.0	0.092	WRKY20	Probable WRKY transcription factor 20 [Source:UniProtKB/Swiss-Prot;Acc:Q93WV0]
A3SS	AT1G76630	1	+	28760785	28760937	28760796	28760937	28760627	28760720	0.0136046	0.330906	0.0,0.0,0.0	0.061,0.038,0.114	-0.071	SKI3	Tetratricopeptide repeat protein SKI3 [Source:UniProtKB/Swiss-Prot;Acc:F4I3Z5]
A3SS	AT1G07780	1	-	2412193	2412219	2412193	2412216	2412609	2412677	0.0137061	0.332762	0.372,0.664,0.58	0.768,0.827,0.84	-0.273	PAI1	N-(5'-phosphoribosyl)anthranilate isomerase 1, chloroplastic [Source:UniProtKB/Swiss-Prot;Acc:Q42440]
A3SS	AT1G76850	1	+	28850853	28851035	28850883	28851035	28850627	28850757	0.0138336	0.334796	0.854,1.0,0.924	1.0,1.0,1.0	-0.074	SEC5A	Exocyst complex component SEC5A [Source:UniProtKB/Swiss-Prot;Acc:Q8S3U9]
A3SS	AT1G07560	1	+	2329516	2329694	2329674	2329694	2329338	2329420	0.0138407	0.334796	1.0,1.0,1.0	1.0,0.059,1.0	0.314		Probable LRR receptor-like serine/threonine-protein kinase At1g07560 [Source:UniProtKB/Swiss-Prot;Acc:C0LGD9]
A3SS	AT4G21820	4	+	11580021	11580147	11580032	11580147	11579846	11579900	0.0138719	0.335241	1.0,1.0,0.438	1.0,1.0,1.0	-0.187		binding;calmodulin binding [Source:TAIR;Acc:AT4G21820]
A3SS	AT1G66730	1	+	24887643	24887725	24887666	24887725	24887434	24887552	0.0138902	0.335375	0.929,1.0,0.919	0.887,0.777,0.95	0.078	AtLIG6	DNA LIGASE 6 [Source:TAIR;Acc:AT1G66730]
A3SS	AT1G04910	1	-	1390776	1390983	1390776	1390931	1391066	1391187	0.0140912	0.339297	1.0,1.0,1.0	1.0,1.0,0.498	0.167		Uncharacterized protein At1g04910 [Source:UniProtKB/Swiss-Prot;Acc:Q8W486]
A3SS	AT4G24580	4	-	12688272	12688425	12688272	12688407	12688489	12688553	0.0142654	0.3426	0.0,0.0,0.0	0.193,0.152,0.0	-0.115	REN1	Rho GTPase activation protein (RhoGAP) with PH domain [Source:TAIR;Acc:AT4G24580]
A3SS	AT3G62620	3	+	23160198	23160320	23160254	23160320	23160035	23160075	0.0142674	0.3426	1.0,1.0,1.0	0.814,1.0,1.0	0.062		sucrose-phosphatase-related [Source:TAIR;Acc:AT3G62620]
A3SS	AT3G15352	3	+	5180125	5180181	5180141	5180181	5179412	5179555	0.0143534	0.343813	1.0,0.694,0.476	0.679,1.0,1.0	-0.17	COX17-1	Cytochrome c oxidase copper chaperone 1 [Source:UniProtKB/Swiss-Prot;Acc:Q9LJQ9]
A3SS	AT4G14720	4	-	8432526	8432717	8432526	8432714	8432790	8432854	0.0143704	0.343819	0.842,0.888,0.895	0.719,0.796,0.842	0.089	TIFY4B	Protein TIFY 4B [Source:UniProtKB/Swiss-Prot;Acc:Q8GY55]
A3SS	AT5G03180	5	-	754450	754542	754450	754537	754625	755081	0.0144206	0.344707	1.0,0.678,1.0	1.0,1.0,1.0	-0.107		RING/U-box superfamily protein [Source:TAIR;Acc:AT5G03180]
A3SS	AT4G37030	4	+	17452864	17452998	17452919	17452998	17452585	17452781	0.0145264	0.345668	1.0,1.0,1.0	0.631,0.786,1.0	0.194		unknown protein; FUNCTIONS IN: molecular_function unknown; INVOLVED IN: biological_process unknown; LOCATED IN: endomembrane system; BEST Arabidopsis thaliana protein match is: unknown protein (TAIR:AT4G12680.1); Has 101 Blast hits to 99 proteins in /.../ecies: Archae - 0; Bacteria - 0; Metazoa - 0; Fungi - 0; Plants - 101; Viruses - 0; Other Eukaryotes - 0 (source: NCBI BLink). [Source:TAIR;Acc:…
A3SS	AT1G08030	1	-	2491275	2491347	2491275	2491320	2491433	2491574	0.0145162	0.345668	0.739,1.0,1.0	0.587,0.847,0.749	0.185	TPST	Protein-tyrosine sulfotransferase [Source:UniProtKB/Swiss-Prot;Acc:Q3EDG5]
A3SS	AT1G04910	1	-	1390776	1390980	1390776	1390931	1391066	1391187	0.014565	0.346274	1.0,1.0,1.0	1.0,1.0,0.502	0.166		Uncharacterized protein At1g04910 [Source:UniProtKB/Swiss-Prot;Acc:Q8W486]
A3SS	AT3G43920	3	+	15760625	15760859	15760645	15760859	15760432	15760544	0.0145857	0.346453	1.0,1.0,0.92	0.92,0.639,1.0	0.12	DCL3	Endoribonuclease Dicer homolog 3 [Source:UniProtKB/Swiss-Prot;Acc:Q9LXW7]
A3SS	AT4G26300	4	-	13312195	13312270	13312195	13312266	13312443	13312466	0.0146413	0.34746	1.0,1.0,1.0	0.329,1.0,0.329	0.447	emb1027	Arginyl-tRNA synthetase, class Ic [Source:TAIR;Acc:AT4G26300]
A3SS	AT2G29210	2	+	12559232	12559404	12559296	12559404	12559080	12559155	0.0148387	0.349625	1.0,0.849,0.881	0.696,0.93,0.666	0.146		splicing factor PWI domain-containing protein [Source:TAIR;Acc:AT2G29210]
A3SS	AT3G62620	3	+	23160035	23160080	23160047	23160080	23159775	23159923	0.0148363	0.349625	1.0,1.0,0.921	1.0,0.886,0.796	0.08		sucrose-phosphatase-related [Source:TAIR;Acc:AT3G62620]
A3SS	AT4G17910	4	-	9953121	9953194	9953121	9953183	9953260	9953337	0.0147841	0.349625	0.89,0.888,0.77	0.799,0.555,0.546	0.216		Uncharacterized protein At4g17910 [Source:UniProtKB/Swiss-Prot;Acc:B3H6K1]
A3SS	AT3G59340	3	-	21929688	21929865	21929688	21929858	21929951	21930028	0.0147968	0.349625	1.0,1.0,0.49	1.0,1.0,1.0	-0.17		Eukaryotic protein of unknown function (DUF914) [Source:TAIR;Acc:AT3G59340]
A3SS	AT1G51110	1	+	18935638	18935796	18935742	18935796	18935328	18935509	0.0147566	0.349625	0.639,0.674,0.542	1.0,1.0,1.0	-0.382	PAP12	Probable plastid-lipid-associated protein 12, chloroplastic [Source:UniProtKB/Swiss-Prot;Acc:Q8LAP6]
A3SS	AT1G56260	1	-	21065473	21065626	21065473	21065619	21065715	21065853	0.0149237	0.351313	1.0,1.0,1.0	0.889,0.852,1.0	0.086		unknown protein; Has 32 Blast hits to 32 proteins in 16 species: Archae - 0; Bacteria - 0; Metazoa - 2; Fungi - 0; Plants - 28; Viruses - 0; Other Eukaryotes - 2 (source: NCBI BLink). [Source:TAIR;Acc:AT1G56260]
A3SS	AT1G01650	1	-	236144	236296	236144	236285	236428	236548	0.0149988	0.352767	0.942,0.967,0.972	0.969,0.847,0.88	0.062	SPPL4	Signal peptide peptidase-like 4 [Source:UniProtKB/Swiss-Prot;Acc:Q0WMJ8]
A3SS	AT3G61010	3	-	22571491	22571624	22571491	22571557	22571704	22571766	0.0150212	0.352979	0.122,0.078,0.069	0.094,0.0,0.012	0.054		Ferritin/ribonucleotide reductase-like family protein [Source:TAIR;Acc:AT3G61010]
A3SS	AT2G26540	2	-	11288331	11288486	11288331	11288421	11288718	11288814	0.0151401	0.355139	0.875,1.0,0.55	1.0,1.0,1.0	-0.192	UROS	Uroporphyrinogen-III synthase, chloroplastic [Source:UniProtKB/Swiss-Prot;Acc:O48721]
A3SS	AT4G38520	4	-	18016360	18016596	18016360	18016589	18016687	18017055	0.0152286	0.356897	1.0,0.743,0.719	1.0,1.0,1.0	-0.179		Probable protein phosphatase 2C 64 [Source:UniProtKB/Swiss-Prot;Acc:Q5PNS9]
A3SS	AT4G33200	4	-	16005759	16005813	16005759	16005810	16006087	16006187	0.0152792	0.357764	0.195,0.165,0.227	0.311,0.423,0.198	-0.115	XI-I	Myosin-15 [Source:UniProtKB/Swiss-Prot;Acc:Q0WPU1]
A3SS	AT5G58160	5	+	23539257	23539465	23539280	23539465	23539083	23539145	0.0153622	0.359389	1.0,1.0,0.635	0.859,0.521,0.803	0.151		actin binding [Source:TAIR;Acc:AT5G58160]
A3SS	AT5G19460	5	+	6564393	6564573	6564493	6564573	6564213	6564339	0.0154533	0.361198	0.039,0.089,0.039	0.072,0.179,0.11	-0.065	NUDT20	Nudix hydrolase 20, chloroplastic [Source:UniProtKB/Swiss-Prot;Acc:Q8VXZ0]
A3SS	AT3G03350	3	+	792901	793117	792988	793117	792492	792556	0.0156495	0.365136	0.276,0.118,0.091	0.031,0.137,0.032	0.095		NAD(P)-binding Rossmann-fold superfamily protein [Source:TAIR;Acc:AT3G03350]
A3SS	AT1G34120	1	+	12427617	12427726	12427621	12427726	12427379	12427445	0.0157356	0.366172	0.236,0.187,0.076	0.119,0.0,0.052	0.109	IP5P1	Type I inositol 1,4,5-trisphosphate 5-phosphatase 1 [Source:UniProtKB/Swiss-Prot;Acc:Q84MA2]
A3SS	AT1G16610	1	-	5677153	5677396	5677153	5677355	5677465	5677634	0.0157653	0.366539	0.406,0.329,0.591	0.271,0.18,0.311	0.188	SR45	Serine/arginine-rich splicing factor SR45 [Source:UniProtKB/Swiss-Prot;Acc:Q9SEE9]
A3SS	AT5G66810	5	+	26673992	26674147	26674037	26674147	26673797	26673874	0.01581	0.366932	0.099,0.205,0.305	0.136,0.129,0.05	0.098		CONTAINS InterPro DOMAIN/s: CTLH, C-terminal LisH motif (InterPro:IPR006595); BEST Arabidopsis thaliana protein match is: LisH and RanBPM domains containing protein (TAIR:AT1G61150.1); Has 333 Blast hits to 242 proteins in 88 species: Archae - 0; Ba /.../ - 0; Metazoa - 104; Fungi - 47; Plants - 152; Viruses - 0; Other Eukaryotes - 30 (source: NCBI BLink). [Source:TAIR;Acc:AT5G66810]
A3SS	AT2G43465	2	-	18048523	18048642	18048523	18048626	18048709	18048797	0.0162407	0.374945	0.232,0.645,1.0	1.0,1.0,0.694	-0.272		RNA-binding ASCH domain protein [Source:TAIR;Acc:AT2G43465]
A3SS	AT1G16650	1	+	5689616	5689848	5689670	5689848	5689310	5689450	0.0162657	0.375193	1.0,0.596,1.0	0.768,1.0,0.563	0.088		S-adenosyl-L-methionine-dependent methyltransferases superfamily protein [Source:TAIR;Acc:AT1G16650]
A3SS	AT3G51830	3	+	19223136	19223236	19223150	19223236	19222914	19222987	0.0162854	0.375319	0.772,0.778,0.76	0.676,0.659,0.673	0.101	SAC8	Phosphoinositide phosphatase SAC8 [Source:UniProtKB/Swiss-Prot;Acc:Q96328]
A3SS	AT1G05830	1	+	1757227	1757388	1757273	1757388	1757046	1757144	0.0163068	0.375484	1.0,0.729,0.879	1.0,0.942,1.0	-0.111	ATX2	Histone-lysine N-methyltransferase ATX2 [Source:UniProtKB/Swiss-Prot;Acc:P0CB22]
A3SS	AT1G04910	1	-	1390776	1390947	1390776	1390931	1391066	1391187	0.0163261	0.375601	1.0,1.0,1.0	1.0,1.0,0.548	0.151		Uncharacterized protein At1g04910 [Source:UniProtKB/Swiss-Prot;Acc:Q8W486]
A3SS	AT4G10340	4	+	6408637	6408695	6408640	6408695	6408515	6408557	0.0164449	0.377675	1.0,1.0,0.0	1.0,1.0,1.0	-0.333	LHCB5	Chlorophyll a-b binding protein CP26, chloroplastic [Source:UniProtKB/Swiss-Prot;Acc:Q9XF89]
A3SS	AT2G02410	2	+	633616	633791	633627	633791	633399	633524	0.0165316	0.37835	0.059,0.109,0.278	0.244,0.319,0.284	-0.134		unknown protein; CONTAINS InterPro DOMAIN/s: Protein of unknown function DUF901 (InterPro:IPR010298); Has 1151 Blast hits to 1151 proteins in 597 species: Archae - 0; Bacteria - 1105; Metazoa - 0; Fungi - 0; Plants - 42; Viruses - 0; Other Eukaryote /.../(source: NCBI BLink). [Source:TAIR;Acc:AT2G02410]
A3SS	AT1G26440	1	-	9144994	9145228	9144994	9145195	9145412	9146050	0.0165028	0.37835	1.0,0.781,1.0	0.819,1.0,0.728	0.078	UPS5	Ureide permease 5 [Source:UniProtKB/Swiss-Prot;Acc:Q93Z75]
A3SS	AT3G57170	3	-	21159823	21159917	21159823	21159878	21160025	21160435	0.016567	0.378497	1.0,0.929,0.894	1.0,1.0,1.0	-0.059		N-acetylglucosaminyl transferase component family protein / Gpi1 family protein [Source:TAIR;Acc:AT3G57170]
A3SS	AT4G27490	4	+	13739945	13740099	13739951	13740099	13739805	13739835	0.0166946	0.379464	1.0,1.0,0.842	0.962,0.78,0.871	0.076		3'-5'-exoribonuclease family protein [Source:TAIR;Acc:AT4G27490]
A3SS	AT1G72990	1	-	27459896	27460007	27459896	27459987	27460094	27460154	0.016804	0.380827	0.081,0.084,0.069	0.0,0.078,0.0	0.052	BGAL17	Beta-galactosidase 17 [Source:UniProtKB/Swiss-Prot;Acc:Q93Z24]
A3SS	AT2G34770	2	+	14667195	14667376	14667207	14667376	14666978	14667071	0.0168135	0.380827	1.0,0.7,1.0	0.664,0.42,1.0	0.205	FAH1	Fatty acid 2-hydroxylase 1 [Source:UniProtKB/Swiss-Prot;Acc:O48916]
A3SS	AT1G27760	1	+	9669344	9669422	9669353	9669422	9668583	9669265	0.0171016	0.386356	0.895,0.919,0.934	0.792,1.0,0.566	0.13	SAT32	interferon-related developmental regulator family protein / IFRD protein family [Source:TAIR;Acc:AT1G27760]
A3SS	AT1G06510	1	+	1992707	1992906	1992713	1992906	1992332	1992545	0.0171167	0.386365	0.708,1.0,1.0	0.392,1.0,0.659	0.219		unknown protein; FUNCTIONS IN: molecular_function unknown; INVOLVED IN: biological_process unknown; LOCATED IN: chloroplast; EXPRESSED IN: 21 plant structures; EXPRESSED DURING: 13 growth stages; Has 376 Blast hits to 369 proteins in 152 species: Ar /.../ 5; Bacteria - 113; Metazoa - 105; Fungi - 46; Plants - 27; Viruses - 2; Other Eukaryotes - 78 (source: NCBI BLink). [Source:TAIR;Acc:AT1G06510]
A3SS	AT2G20650	2	-	8906139	8906255	8906139	8906248	8906361	8906489	0.017193	0.387424	1.0,0.852,0.828	1.0,0.926,0.963	-0.07		RING/U-box superfamily protein [Source:TAIR;Acc:AT2G20650]
A3SS	AT4G12790	4	-	7518847	7518926	7518847	7518924	7519325	7519422	0.0171887	0.387424	0.866,0.843,0.749	0.823,1.0,1.0	-0.122		P-loop containing nucleoside triphosphate hydrolases superfamily protein [Source:TAIR;Acc:AT4G12790]
A3SS	AT5G55760	5	+	22569687	22569784	22569697	22569784	22569504	22569558	0.0174024	0.390805	1.0,1.0,1.0	1.0,1.0,0.702	0.099	SRT1	NAD-dependent protein deacetylase SRT1 [Source:UniProtKB/Swiss-Prot;Acc:Q9FE17]
A3SS	AT4G05590	4	+	2907853	2908090	2908007	2908090	2907631	2907730	0.0175526	0.393171	0.667,1.0,1.0	0.778,0.273,1.0	0.205	MPC3	Mitochondrial pyruvate carrier 3 [Source:UniProtKB/Swiss-Prot;Acc:Q8LD38]
A3SS	AT1G63980	1	+	23742042	23742201	23742045	23742201	23741856	23741953	0.0176731	0.394864	0.18,0.33,0.552	0.0,0.099,0.212	0.25		D111/G-patch domain-containing protein [Source:TAIR;Acc:AT1G63980]
A3SS	AT2G47250	2	-	19400690	19400925	19400690	19400919	19401239	19402324	0.0178751	0.398026	0.951,0.829,0.421	0.53,0.583,0.347	0.247		Probable pre-mRNA-splicing factor ATP-dependent RNA helicase [Source:UniProtKB/Swiss-Prot;Acc:O22899]
A3SS	AT1G11160	1	+	3734421	3734653	3734426	3734653	3734153	3734271	0.0179188	0.398326	0.0,0.0,0.0	0.196,0.0,0.327	-0.174		Transducin/WD40 repeat-like superfamily protein [Source:TAIR;Acc:AT1G11160]
A3SS	AT4G11260	4	-	6851724	6851828	6851724	6851823	6851915	6851995	0.0180517	0.399931	0.988,1.0,1.0	1.0,0.945,0.862	0.06	SGT1B	Protein SGT1 homolog B [Source:UniProtKB/Swiss-Prot;Acc:Q9SUT5]
A3SS	AT3G62310	3	-	23058276	23058514	23058276	23058402	23058773	23059858	0.0180376	0.399931	0.196,0.204,0.317	0.314,0.323,0.333	-0.084		RNA helicase family protein [Source:TAIR;Acc:AT3G62310]
A3SS	AT2G20570	2	+	8857144	8857256	8857150	8857256	8857002	8857044	0.018034	0.399931	0.617,0.914,1.0	0.853,0.853,1.0	-0.058	GLK1	Transcription activator GLK1 [Source:UniProtKB/Swiss-Prot;Acc:Q9SIV3]
A3SS	AT5G42220	5	+	16875568	16875802	16875589	16875802	16875364	16875482	0.0180436	0.399931	1.0,0.677,0.815	0.93,0.958,0.914	-0.103		Ubiquitin-like superfamily protein [Source:TAIR;Acc:AT5G42220]
A3SS	AT4G09550	4	+	6039686	6039925	6039694	6039925	6039117	6039206	0.0180852	0.400178	0.163,0.111,0.118	0.081,0.046,0.063	0.067	GIP1	Mitotic-spindle organizing protein 1B [Source:UniProtKB/Swiss-Prot;Acc:Q9M0N8]
A3SS	AT1G18090	1	+	6225878	6226015	6225899	6226015	6225743	6225788	0.0180933	0.400178	0.638,0.0,1.0	1.0,1.0,1.0	-0.454		5'-3' exonuclease family protein [Source:TAIR;Acc:AT1G18090]
A3SS	AT1G80620	1	+	30306456	30306539	30306461	30306539	30305361	30306256	0.0181398	0.400872	0.949,0.905,0.92	0.912,0.809,0.882	0.057		S15/NS1, RNA-binding protein [Source:TAIR;Acc:AT1G80620]
A3SS	AT4G17330	4	-	9697326	9697425	9697326	9697416	9697560	9697578	0.018162	0.401027	1.0,0.655,1.0	0.851,0.74,0.792	0.091	ATG2484-1	G2484-1 protein [Source:TAIR;Acc:AT4G17330]
A3SS	AT3G17650	3	+	6035619	6035857	6035687	6035857	6035405	6035540	0.0182038	0.401611	0.535,0.651,0.731	0.858,0.805,0.65	-0.132	YSL5	Probable metal-nicotianamine transporter YSL5 [Source:UniProtKB/Swiss-Prot;Acc:Q9LUN2]
A3SS	AT1G70740	1	-	26675041	26675274	26675041	26675237	26675369	26675503	0.018352	0.403524	0.187,0.168,0.617	0.547,0.668,0.573	-0.272		Protein kinase superfamily protein [Source:TAIR;Acc:AT1G70740]
A3SS	AT2G17580	2	+	7646677	7646765	7646683	7646765	7646462	7646578	0.0183777	0.403524	0.886,1.0,0.81	0.954,1.0,1.0	-0.086		Polynucleotide adenylyltransferase family protein [Source:TAIR;Acc:AT2G17580]
A3SS	AT5G13390	5	+	4294830	4295065	4294845	4295065	4294183	4294755	0.0183541	0.403524	0.271,0.209,0.166	0.155,0.144,0.095	0.084	NEF1	no exine formation 1 [Source:TAIR;Acc:AT5G13390]
A3SS	AT1G58230	1	+	21576959	21577085	21576969	21577085	21576376	21576583	0.0183824	0.403524	0.975,0.864,0.922	0.969,0.974,1.0	-0.061		binding [Source:TAIR;Acc:AT1G58230]
A3SS	AT2G41500	2	-	17307175	17307284	17307175	17307265	17307366	17307426	0.0183995	0.403564	0.129,0.0,0.067	0.113,0.338,0.045	-0.1	EMB2776	U4/U6 small nuclear ribonucleoprotein PRP4-like protein [Source:UniProtKB/Swiss-Prot;Acc:O22212]
A3SS	AT1G08980	1	+	2885839	2886008	2885852	2886008	2885625	2885770	0.0187785	0.409829	0.844,0.889,0.955	0.806,0.88,0.803	0.066	AMI1	Amidase 1 [Source:UniProtKB/Swiss-Prot;Acc:Q9FR37]
A3SS	AT5G02180	5	+	432130	432314	432134	432314	432007	432031	0.0187688	0.409829	1.0,0.831,1.0	0.947,0.868,0.863	0.051		Transmembrane amino acid transporter family protein [Source:TAIR;Acc:AT5G02180]
A3SS	AT1G19330	1	-	6681360	6681515	6681360	6681500	6681682	6681809	0.0188309	0.410632	0.468,0.404,0.298	0.306,0.268,0.2	0.132		unknown protein; BEST Arabidopsis thaliana protein match is: unknown protein (TAIR:AT1G75060.1); Has 145 Blast hits to 145 proteins in 43 species: Archae - 0; Bacteria - 0; Metazoa - 40; Fungi - 0; Plants - 104; Viruses - 0; Other Eukaryotes - 1 (so /.../NCBI BLink). [Source:TAIR;Acc:AT1G19330]
A3SS	AT1G72990	1	-	27461769	27461910	27461769	27461895	27461997	27462392	0.0189849	0.412965	0.0,0.0,0.0	0.234,0.0,0.0	-0.078	BGAL17	Beta-galactosidase 17 [Source:UniProtKB/Swiss-Prot;Acc:Q93Z24]
A3SS	AT3G61700	3	+	22836564	22836705	22836592	22836705	22836411	22836428	0.0191023	0.414432	0.717,0.458,0.679	1.0,0.124,0.0	0.243		Plant protein 1589 of unknown function [Source:TAIR;Acc:AT3G61700]
A3SS	AT4G08180	4	+	5171970	5172162	5171999	5172162	5171751	5171907	0.0190902	0.414432	0.144,1.0,0.219	0.095,0.078,0.107	0.361	ORP1C	Oxysterol-binding protein-related protein 1C [Source:UniProtKB/Swiss-Prot;Acc:Q8L751]
A3SS	AT1G67785	1	-	25416068	25416245	25416068	25416178	25416879	25416984	0.0191153	0.414432	1.0,1.0,0.663	1.0,1.0,1.0	-0.112		unknown protein; Has 30 Blast hits to 30 proteins in 12 species: Archae - 0; Bacteria - 0; Metazoa - 0; Fungi - 0; Plants - 30; Viruses - 0; Other Eukaryotes - 0 (source: NCBI BLink). [Source:TAIR;Acc:AT1G67785]
A3SS	AT2G28360	2	-	12127220	12127347	12127220	12127284	12127476	12127685	0.0193116	0.418	0.22,0.809,0.585	0.779,0.821,1.0	-0.329		SIT4 phosphatase-associated family protein [Source:TAIR;Acc:AT2G28360]
A3SS	AT1G03930	1	+	1006904	1007001	1006929	1007001	1006606	1006797	0.0193549	0.418593	1.0,1.0,1.0	1.0,0.775,0.721	0.168	ADK1	dual specificity kinase 1 [Source:TAIR;Acc:AT1G03930]
A3SS	AT1G10930	1	-	3654717	3654876	3654717	3654873	3654974	3655059	0.0194386	0.419715	0.908,0.822,0.959	1.0,0.97,1.0	-0.094	RECQL4A	ATP-dependent DNA helicase Q-like 4A [Source:UniProtKB/Swiss-Prot;Acc:Q8L840]
A3SS	AT1G03960	1	+	1014634	1014872	1014766	1014872	1013714	1014543	0.0194967	0.420116	1.0,0.117,0.0	0.0,0.0,0.0	0.372	B''EPSILON	Probable serine/threonine protein phosphatase 2A regulatory subunit B''epsilon [Source:UniProtKB/Swiss-Prot;Acc:Q84JI6]
A3SS	AT1G07290	1	-	2243744	2243884	2243744	2243859	2243967	2244160	0.0194801	0.420116	1.0,0.873,1.0	0.896,0.826,0.683	0.156	GONST2	GDP-mannose transporter GONST2 [Source:UniProtKB/Swiss-Prot;Acc:Q84L09]
A3SS	AT4G04740	4	-	2404217	2404335	2404217	2404242	2404441	2404468	0.0195681	0.421129	0.382,1.0,1.0	0.336,0.15,0.553	0.448	CPK23	Calcium-dependent protein kinase 23 [Source:UniProtKB/Swiss-Prot;Acc:Q9M101]
A3SS	AT3G16565	3	-	5641835	5641934	5641835	5641905	5642141	5642254	0.0195897	0.42125	0.627,0.0,0.716	0.584,0.808,1.0	-0.35		alanine-tRNA ligases;nucleic acid binding;ligases, forming aminoacyl-tRNA and related compounds;nucleotide binding;ATP binding [Source:TAIR;Acc:AT3G16565]
A3SS	AT3G24180	3	-	8741080	8741172	8741080	8741167	8741268	8741367	0.0196399	0.421986	0.86,0.855,0.804	0.902,0.862,0.931	-0.059		Beta-glucosidase, GBA2 type family protein [Source:TAIR;Acc:AT3G24180]
A3SS	AT3G60500	3	+	22354232	22354381	22354241	22354381	22353882	22354116	0.0196865	0.422642	0.092,0.169,0.153	0.175,0.0,0.0	0.08	CER7	Protein ECERIFERUM 7 [Source:UniProtKB/Swiss-Prot;Acc:Q9M209]
A3SS	AT5G09230	5	+	2871452	2871691	2871647	2871691	2871376	2871429	0.0198887	0.425942	0.4,0.6,0.231	0.789,0.429,0.8	-0.262	SRT2	NAD-dependent protein deacetylase SRT2 [Source:UniProtKB/Swiss-Prot;Acc:Q94AQ6]
A3SS	AT1G29170	1	-	10193220	10193288	10193220	10193285	10193376	10193506	0.0199765	0.42685	0.827,0.844,1.0	0.914,1.0,1.0	-0.081	SCAR3	Protein SCAR3 [Source:UniProtKB/Swiss-Prot;Acc:Q9LP46]
A3SS	AT1G67960	1	-	25482967	25483071	25482967	25483016	25483294	25483446	0.0199959	0.42685	0.882,0.98,0.977	0.866,0.959,0.808	0.069	POD1	Protein POLLEN DEFECTIVE IN GUIDANCE 1 [Source:UniProtKB/Swiss-Prot;Acc:F4HVJ3]
A3SS	AT5G42470	5	+	16983436	16983543	16983441	16983543	16983311	16983347	0.0200491	0.427638	0.074,0.135,0.016	0.153,0.15,0.202	-0.093		CONTAINS InterPro DOMAIN/s: Brain/reproductive organ-expressed protein (InterPro:IPR010358); Has 35333 Blast hits to 34131 proteins in 2444 species: Archae - 798; Bacteria - 22429; Metazoa - 974; Fungi - 991; Plants - 531; Viruses - 0; Other Eukaryo /.../9610 (source: NCBI BLink). [Source:TAIR;Acc:AT5G42470]
A3SS	AT5G41370	5	+	16552659	16552838	16552694	16552838	16552548	16552572	0.0201147	0.42869	0.867,0.735,0.603	0.545,0.364,0.645	0.217	XPB1	DNA repair helicase XPB1 [Source:UniProtKB/Swiss-Prot;Acc:Q38861]
A3SS	AT5G27680	5	-	9794820	9794943	9794820	9794937	9795095	9795183	0.0201727	0.429232	0.492,0.635,0.772	0.863,0.946,0.813	-0.241	RECQSIM	ATP-dependent DNA helicase Q-like SIM [Source:UniProtKB/Swiss-Prot;Acc:Q9FT69]
A3SS	AT2G39950	2	-	16678966	16679203	16678966	16679015	16679656	16679772	0.0203748	0.432833	0.179,0.12,0.286	0.158,0.423,0.647	-0.214		unknown protein; Has 978 Blast hits to 254 proteins in 81 species: Archae - 0; Bacteria - 8; Metazoa - 109; Fungi - 53; Plants - 41; Viruses - 0; Other Eukaryotes - 767 (source: NCBI BLink). [Source:TAIR;Acc:AT2G39950]
A3SS	AT1G66730	1	+	24888398	24888501	24888405	24888501	24888015	24888112	0.0204715	0.433838	0.841,0.743,0.896	0.67,0.809,0.398	0.201	AtLIG6	DNA LIGASE 6 [Source:TAIR;Acc:AT1G66730]
A3SS	AT1G13920	1	+	4759559	4759754	4759562	4759754	4759373	4759455	0.0204641	0.433838	0.78,0.725,0.932	0.685,0.535,0.685	0.177		Remorin family protein [Source:TAIR;Acc:AT1G13920]
A3SS	AT3G58640	3	-	21690661	21690781	21690661	21690776	21690928	21691188	0.0205227	0.434224	0.911,0.922,0.975	0.813,0.871,0.97	0.051		Mitogen activated protein kinase kinase kinase-related [Source:TAIR;Acc:AT3G58640]
A3SS	AT1G04300	1	-	1151948	1152062	1151948	1152053	1152316	1152475	0.0205879	0.435253	0.587,1.0,1.0	0.655,1.0,0.559	0.124		TRAF-like superfamily protein [Source:TAIR;Acc:AT1G04300]
A3SS	AT5G01720	5	-	269136	269262	269136	269250	269350	269476	0.020735	0.436493	0.651,1.0,1.0	0.62,1.0,0.651	0.127	FBL3	F-box/LRR-repeat protein 3 [Source:UniProtKB/Swiss-Prot;Acc:Q8RWU5]
A3SS	AT1G67300	1	-	25196660	25196931	25196660	25196797	25196934	25197089	0.0207436	0.436493	0.052,0.059,0.059	0.105,0.163,0.055	-0.051		Probable plastidic glucose transporter 2 [Source:UniProtKB/Swiss-Prot;Acc:Q9FYG3]
A3SS	AT4G17695	4	-	9848929	9849014	9848929	9849005	9849092	9849312	0.0207459	0.436493	1.0,0.869,0.971	0.888,0.887,0.833	0.077	KAN3	Probable transcription factor KAN3 [Source:UniProtKB/Swiss-Prot;Acc:Q941I2]
A3SS	AT3G62310	3	-	23058276	23058520	23058276	23058475	23058773	23059858	0.020833	0.437625	0.835,1.0,1.0	1.0,1.0,1.0	-0.055		RNA helicase family protein [Source:TAIR;Acc:AT3G62310]
A3SS	AT1G65150	1	-	24205421	24205571	24205421	24205563	24205693	24205775	0.020905	0.438789	0.489,0.728,0.264	0.34,0.0,0.323	0.273		TRAF-like family protein [Source:TAIR;Acc:AT1G65150]
A3SS	AT1G04930	1	-	1397010	1397139	1397010	1397124	1397496	1397739	0.0210185	0.44047	0.0,0.0,0.0	0.0,0.255,0.0	-0.085		hydroxyproline-rich glycoprotein family protein [Source:TAIR;Acc:AT1G04930]
A3SS	AT1G30590	1	-	10838549	10838783	10838549	10838772	10838876	10838954	0.0210757	0.441317	0.859,1.0,1.0	0.849,0.929,0.92	0.054		RNA polymerase I specific transcription initiation factor RRN3 protein [Source:TAIR;Acc:AT1G30590]
A3SS	AT3G48120	3	+	17774217	17774385	17774225	17774385	17774049	17774114	0.0211065	0.44161	1.0,1.0,0.964	0.851,1.0,0.925	0.063		unknown protein; Has 22990 Blast hits to 12942 proteins in 666 species: Archae - 8; Bacteria - 739; Metazoa - 13803; Fungi - 2465; Plants - 1363; Viruses - 116; Other Eukaryotes - 4496 (source: NCBI BLink). [Source:TAIR;Acc:AT3G48120]
A3SS	AT4G23250	4	-	12165728	12165844	12165728	12165829	12165922	12166048	0.021167	0.44163	0.137,0.174,0.283	0.086,0.137,0.116	0.085	EMB1290	kinases;protein kinases [Source:TAIR;Acc:AT4G23250]
A3SS	AT2G13560	2	+	5653550	5653648	5653582	5653648	5653261	5653327	0.0211744	0.44163	1.0,0.89,1.0	0.815,0.82,0.918	0.112	NAD-ME1	NAD-dependent malic enzyme 1, mitochondrial [Source:UniProtKB/Swiss-Prot;Acc:Q9SIU0]
A3SS	AT1G18730	1	+	6461754	6461910	6461855	6461910	6461173	6461389	0.0211559	0.44163	0.642,1.0,0.0	0.843,0.183,0.23	0.129	PNSB4	Photosynthetic NDH subunit of subcomplex B 4, chloroplastic [Source:UniProtKB/Swiss-Prot;Acc:Q8RXS1]
A3SS	AT1G48500	1	+	17932823	17933152	17932979	17933152	17931475	17931733	0.0213627	0.443799	0.037,0.13,0.13	0.0,0.053,0.077	0.056	TIFY6A	Protein TIFY 6A [Source:UniProtKB/Swiss-Prot;Acc:Q58G47]
A3SS	AT1G10870	1	-	3617838	3617944	3617838	3617924	3618076	3618198	0.0214488	0.444931	0.83,0.899,0.47	0.432,0.608,0.399	0.253	AGD4	ADP-ribosylation factor GTPase-activating protein AGD4 [Source:UniProtKB/Swiss-Prot;Acc:Q9SMX5]
A3SS	AT5G27860	5	-	9875400	9875569	9875400	9875445	9875644	9875707	0.021451	0.444931	0.709,0.837,0.694	0.846,0.809,0.805	-0.073		unknown protein; FUNCTIONS IN: molecular_function unknown; INVOLVED IN: biological_process unknown; LOCATED IN: chloroplast; EXPRESSED IN: pollen tube; Has 35333 Blast hits to 34131 proteins in 2444 species: Archae - 798; Bacteria - 22429; Metazoa - /.../Fungi - 991; Plants - 531; Viruses - 0; Other Eukaryotes - 9610 (source: NCBI BLink). [Source:TAIR;Acc:AT5G27860]
A3SS	AT4G31480	4	+	15263795	15263833	15263829	15263833	15263153	15263338	0.0215702	0.446349	0.329,0.319,1.0	1.0,0.522,1.0	-0.291		Coatomer subunit beta-1 [Source:UniProtKB/Swiss-Prot;Acc:Q9SV21]
A3SS	AT1G67850	1	+	25439024	25439223	25439053	25439223	25437899	25438272	0.0216106	0.446834	1.0,0.716,0.605	0.883,0.0,1.0	0.146		Protein of unknown function (DUF707) [Source:TAIR;Acc:AT1G67850]
A3SS	AT4G09680	4	+	6117952	6118047	6117957	6118047	6116754	6117850	0.021752	0.449406	0.354,0.297,0.493	0.334,0.196,0.104	0.17	CTC1	conserved telomere maintenance component 1 [Source:TAIR;Acc:AT4G09680]
A3SS	AT3G21630	3	-	7617411	7617570	7617411	7617567	7617664	7617672	0.0217936	0.449911	0.16,0.165,0.131	0.021,0.099,0.497	-0.054	CERK1	Chitin elicitor receptor kinase 1 [Source:UniProtKB/Swiss-Prot;Acc:A8R7E6]
A3SS	AT2G27340	2	+	11696936	11697558	11697448	11697558	11696736	11696799	0.0219232	0.451687	0.611,0.86,1.0	0.927,0.843,1.0	-0.1		N-acetylglucosaminylphosphatidylinositol de-N-acetylase family protein [Source:TAIR;Acc:AT2G27340]
A3SS	AT2G40410	2	+	16874704	16874871	16874711	16874871	16874371	16874616	0.0219488	0.451687	0.155,0.145,0.06	0.143,0.183,0.211	-0.059	CAN2	Staphylococcal-like nuclease CAN2 [Source:UniProtKB/Swiss-Prot;Acc:F4IH31]
A3SS	AT3G12100	3	-	3855362	3855401	3855362	3855396	3855531	3855601	0.0219653	0.451687	0.955,0.965,0.974	0.898,0.925,0.919	0.051	MTPC2	Metal tolerance protein C2 [Source:UniProtKB/Swiss-Prot;Acc:Q6ICY4]
A3SS	AT5G08650	5	-	2809639	2809798	2809639	2809790	2810270	2810337	0.0221601	0.454981	1.0,0.892,1.0	1.0,0.437,1.0	0.152		Translation factor GUF1 homolog, chloroplastic [Source:UniProtKB/Swiss-Prot;Acc:Q9FNM5]
A3SS	AT1G59560	1	+	21882238	21882334	21882242	21882334	21882042	21882158	0.0222252	0.455609	1.0,1.0,1.0	0.939,0.887,1.0	0.058	ZCF61	E3 Ubiquitin ligase family protein [Source:TAIR;Acc:AT1G59560]
A3SS	AT1G14660	1	-	5033767	5033886	5033767	5033875	5033963	5034008	0.0222472	0.455631	0.0,0.338,0.0	0.0,0.0,0.043	0.098	NHX8	Sodium/hydrogen exchanger 8 [Source:UniProtKB/Swiss-Prot;Acc:Q3YL57]
A3SS	AT5G04900	5	+	1436422	1436469	1436430	1436469	1436275	1436333	0.0223224	0.455631	1.0,0.656,0.417	1.0,0.656,1.0	-0.194	NOL	Chlorophyll(ide) b reductase NOL, chloroplastic [Source:UniProtKB/Swiss-Prot;Acc:Q8LEU3]
A3SS	AT5G45160	5	+	18267386	18267478	18267396	18267478	18267231	18267300	0.0223063	0.455631	0.919,0.88,1.0	0.94,0.855,0.767	0.079		Protein ROOT HAIR DEFECTIVE 3 homolog 2 [Source:UniProtKB/Swiss-Prot;Acc:Q9FKE9]
A3SS	AT3G04810	3	+	1317840	1317963	1317946	1317963	1317259	1317512	0.0222676	0.455631	0.0,0.227,1.0	0.683,1.0,0.701	-0.386	NEK2	Serine/threonine-protein kinase Nek2 [Source:UniProtKB/Swiss-Prot;Acc:Q9CAU7]
A3SS	AT1G67900	1	+	25466851	25467159	25467051	25467159	25464725	25464987	0.0225411	0.458869	0.9,0.926,1.0	0.718,0.938,1.0	0.057		BTB/POZ domain-containing protein At1g67900 [Source:UniProtKB/Swiss-Prot;Acc:Q9C9V6]
A3SS	AT3G07750	3	+	2473477	2473608	2473483	2473608	2473234	2473325	0.022612	0.459603	0.733,0.836,0.824	0.725,0.648,0.629	0.13		3'-5'-exoribonuclease family protein [Source:TAIR;Acc:AT3G07750]
A3SS	AT4G35785	4	-	16953522	16953890	16953522	16953592	16953969	16954119	0.022892	0.463862	0.521,0.498,0.509	0.57,0.617,0.591	-0.083		RNA-binding (RRM/RBD/RNP motifs) family protein [Source:TAIR;Acc:AT4G35785]
A3SS	AT4G21090	4	-	11258211	11258327	11258211	11258304	11258452	11258588	0.0229676	0.46468	0.911,0.715,0.635	0.822,0.978,0.823	-0.121	MFDX2	Adrenodoxin-like protein 2, mitochondrial [Source:UniProtKB/Swiss-Prot;Acc:Q8S904]
A3SS	AT2G01490	2	+	221643	221727	221669	221727	221465	221587	0.0231275	0.466491	0.222,0.461,0.3	0.631,0.255,1.0	-0.301	PAHX	Phytanoyl-CoA dioxygenase [Source:UniProtKB/Swiss-Prot;Acc:Q9ZVF6]
A3SS	AT4G27490	4	+	13741159	13741299	13741189	13741299	13740869	13740958	0.0232685	0.467892	1.0,1.0,1.0	0.594,1.0,0.902	0.168		3'-5'-exoribonuclease family protein [Source:TAIR;Acc:AT4G27490]
A3SS	AT3G58650	3	-	21697068	21697192	21697068	21697186	21697287	21698856	0.0234041	0.47026	1.0,1.0,1.0	0.693,0.853,1.0	0.151		unknown protein; FUNCTIONS IN: molecular_function unknown; INVOLVED IN: biological_process unknown; LOCATED IN: plasma membrane; EXPRESSED IN: 14 plant structures; EXPRESSED DURING: 8 growth stages; BEST Arabidopsis thaliana protein match is: unknow /.../ein (TAIR:AT5G26910.1); Has 2350 Blast hits to 1412 proteins in 248 species: Archae - 0; Bacteria - 487; Metazoa - 577; Fungi - 236; Plants - 18…
A3SS	AT3G19980	3	+	6963069	6963222	6963072	6963222	6962917	6962975	0.0234252	0.470324	0.0,0.0,0.0	0.597,0.0,0.0	-0.199	FYPP3	Phytochrome-associated serine/threonine-protein phosphatase 3 [Source:UniProtKB/Swiss-Prot;Acc:Q9LHE7]
A3SS	AT3G06880	3	-	2170653	2170775	2170653	2170770	2170845	2170971	0.0234874	0.470855	1.0,0.661,0.0	1.0,1.0,1.0	-0.446		Transducin/WD40 repeat-like superfamily protein [Source:TAIR;Acc:AT3G06880]
A3SS	AT5G18420	5	-	6105904	6105989	6105904	6105986	6106199	6106341	0.0235504	0.471384	0.497,0.542,0.445	0.406,0.388,0.324	0.122		unknown protein; FUNCTIONS IN: molecular_function unknown; INVOLVED IN: biological_process unknown; LOCATED IN: cellular_component unknown; EXPRESSED IN: 25 plant structures; EXPRESSED DURING: 15 growth stages; CONTAINS InterPro DOMAIN/s: Protein of /.../wn function DUF2363 (InterPro:IPR019312); Has 1807 Blast hits to 1807 proteins in 277 species: Archae - 0; Bacteria - 0; Metazoa - 736; Fungi - …
A3SS	AT5G24060	5	-	8132603	8132802	8132603	8132787	8133046	8133122	0.0237029	0.473544	0.709,0.523,0.314	0.234,0.186,0.337	0.263		Pentatricopeptide repeat (PPR) superfamily protein [Source:TAIR;Acc:AT5G24060]
A3SS	AT2G22530	2	-	9575369	9575466	9575369	9575462	9575601	9575745	0.0240235	0.476864	0.959,0.611,0.729	0.927,0.918,0.86	-0.135		Alkaline-phosphatase-like family protein [Source:TAIR;Acc:AT2G22530]
A3SS	AT1G17850	1	-	6148046	6148196	6148046	6148191	6148313	6148367	0.0239731	0.476864	0.959,0.745,0.776	0.93,0.965,0.882	-0.099	STR8	Rhodanese-like domain-containing protein 8, chloroplastic [Source:UniProtKB/Swiss-Prot;Acc:F4I933]
A3SS	AT1G01020	1	-	7761	7831	7761	7828	7941	7987	0.0240405	0.476864	0.0,0.664,0.33	1.0,0.33,0.747	-0.361	ARV1	Arv1-like protein [Source:TAIR;Acc:AT1G01020]
A3SS	AT5G06265	5	+	1906563	1906766	1906566	1906766	1906378	1906424	0.0239976	0.476864	0.747,0.397,1.0	0.664,0.0,0.0	0.493		hyaluronan mediated motility receptor-related [Source:TAIR;Acc:AT5G06265]
A3SS	AT3G17340	3	-	5924427	5924493	5924427	5924490	5924587	5924665	0.0240747	0.477182	0.0,0.0,0.0	0.091,0.062,0.0	-0.051		ARM repeat superfamily protein [Source:TAIR;Acc:AT3G17340]
A3SS	AT1G64230	1	+	23833749	23833861	23833773	23833861	23833550	23833671	0.0244146	0.48283	0.955,0.932,0.693	0.802,0.733,0.722	0.108	UBC28	Ubiquitin-conjugating enzyme E2 28 [Source:UniProtKB/Swiss-Prot;Acc:Q94F47]
A3SS	AT5G26610	5	+	9375252	9375527	9375429	9375527	9375182	9375230	0.0245751	0.484911	0.929,0.692,0.641	0.918,0.758,1.0	-0.138		D111/G-patch domain-containing protein [Source:TAIR;Acc:AT5G26610]
A3SS	AT5G05740	5	-	1724670	1724879	1724670	1724868	1724966	1725120	0.0248177	0.487871	0.824,0.652,0.484	1.0,0.652,1.0	-0.231	EGY2	Probable zinc metalloprotease EGY2, chloroplastic [Source:UniProtKB/Swiss-Prot;Acc:Q9FFK3]
A3SS	AT5G50950	5	+	20733164	20733356	20733290	20733356	20732969	20733068	0.0248668	0.488471	1.0,1.0,1.0	0.86,1.0,0.902	0.079	FUM2	Fumarate hydratase 2, chloroplastic [Source:UniProtKB/Swiss-Prot;Acc:Q9FI53]
A3SS	AT3G17650	3	+	6035667	6035857	6035687	6035857	6035405	6035540	0.0250603	0.491541	0.744,0.792,0.854	0.919,0.87,0.796	-0.065	YSL5	Probable metal-nicotianamine transporter YSL5 [Source:UniProtKB/Swiss-Prot;Acc:Q9LUN2]
A3SS	AT5G05540	5	+	1637717	1637833	1637725	1637833	1637569	1637639	0.0251808	0.49317	0.947,0.868,0.899	0.814,0.845,0.831	0.075	SDN2	Small RNA degrading nuclease 2 [Source:UniProtKB/Swiss-Prot;Acc:Q9FFG1]
A3SS	AT4G29790	4	+	14587054	14587178	14587083	14587178	14586221	14586968	0.0252344	0.493853	0.0,0.387,0.296	0.0,0.086,0.0	0.199		unknown protein; BEST Arabidopsis thaliana protein match is: unknown protein (TAIR:AT2G19390.1); Has 538 Blast hits to 357 proteins in 124 species: Archae - 0; Bacteria - 74; Metazoa - 109; Fungi - 58; Plants - 105; Viruses - 2; Other Eukaryotes - 1 /.../urce: NCBI BLink). [Source:TAIR;Acc:AT4G29790]
A3SS	AT1G55325	1	+	20639507	20639606	20639527	20639606	20639008	20639088	0.0252545	0.493877	0.073,0.041,0.029	0.16,0.078,0.084	-0.06	MED13	Mediator of RNA polymerase II transcription subunit 13 [Source:UniProtKB/Swiss-Prot;Acc:F4I096]
A3SS	AT5G08720	5	-	2841877	2841960	2841877	2841946	2842034	2842481	0.0253878	0.49575	1.0,1.0,1.0	0.734,0.749,1.0	0.172		CONTAINS InterPro DOMAIN/s: Streptomyces cyclase/dehydrase (InterPro:IPR005031); BEST Arabidopsis thaliana protein match is: Polyketide cyclase / dehydrase and lipid transport protein (TAIR:AT4G01650.1); Has 30201 Blast hits to 17322 proteins in 780 /.../es: Archae - 12; Bacteria - 1396; Metazoa - 17338; Fungi - 3422; Plants - 5037; Viruses - 0; Other Eukaryotes - 2996 (source: NCBI BLink). [Sour…
A3SS	AT3G53270	3	-	19752448	19752683	19752448	19752676	19752994	19753199	0.0253815	0.49575	0.59,0.202,0.243	0.51,0.562,0.852	-0.296		Small nuclear RNA activating complex (SNAPc), subunit SNAP43 protein [Source:TAIR;Acc:AT3G53270]
A3SS	AT2G24190	2	-	10284648	10284856	10284648	10284841	10284914	10285000	0.0256844	0.500057	0.268,0.0,0.289	0.051,0.0,0.111	0.132	SDR2B	Short-chain dehydrogenase/reductase 2b [Source:UniProtKB/Swiss-Prot;Acc:Q9ZUH5]
A3SS	AT4G20320	4	+	10976053	10976171	10976102	10976171	10975898	10975949	0.0257518	0.50063	0.96,0.887,0.933	0.744,0.872,0.925	0.08		CTP synthase family protein [Source:TAIR;Acc:AT4G20320]
A3SS	AT4G10090	4	+	6306612	6306824	6306615	6306824	6305769	6305842	0.0257821	0.500849	0.0,0.215,0.09	0.0,0.0,0.132	0.058	ELP6	Elongator complex protein 6 [Source:UniProtKB/Swiss-Prot;Acc:Q8L9Y2]
A3SS	AT1G05890	1	+	1782931	1783019	1782954	1783019	1782825	1782868	0.025824	0.501294	0.777,1.0,1.0	1.0,0.567,0.303	0.302	ARI5	Probable E3 ubiquitin-protein ligase ARI5 [Source:UniProtKB/Swiss-Prot;Acc:Q8L829]
A3SS	AT5G07910	5	-	2522321	2522415	2522321	2522407	2522593	2522655	0.0259148	0.502685	0.093,0.152,0.172	0.044,0.125,0.056	0.064		Leucine-rich repeat (LRR) family protein [Source:TAIR;Acc:AT5G07910]
A3SS	AT3G11500	3	-	3621773	3621890	3621773	3621876	3622281	3622304	0.0260174	0.504305	0.734,0.847,0.91	0.446,0.724,0.682	0.213		Small nuclear ribonucleoprotein family protein [Source:TAIR;Acc:AT3G11500]
A3SS	AT1G14560	1	+	4981570	4981700	4981614	4981700	4980671	4981455	0.0261212	0.505573	0.0,0.065,0.078	0.06,0.142,0.15	-0.07		Mitochondrial substrate carrier family protein [Source:TAIR;Acc:AT1G14560]
A3SS	AT3G04490	3	+	1205458	1205563	1205463	1205563	1205090	1205200	0.0261754	0.505878	0.925,0.866,0.964	0.872,0.75,0.879	0.085		unknown protein; BEST Arabidopsis thaliana protein match is: unknown protein (TAIR:AT4G38092.1); Has 75 Blast hits to 64 proteins in 20 species: Archae - 0; Bacteria - 0; Metazoa - 36; Fungi - 0; Plants - 22; Viruses - 0; Other Eukaryotes - 17 (sour /.../BI BLink). [Source:TAIR;Acc:AT3G04490]
A3SS	AT2G35880	2	-	15065517	15065624	15065517	15065593	15065708	15065870	0.026231	0.506211	0.156,1.0,0.454	0.714,1.0,0.909	-0.338		TPX2 (targeting protein for Xklp2) protein family [Source:TAIR;Acc:AT2G35880]
A3SS	AT4G39630	4	-	18397856	18398063	18397856	18397992	18398246	18398309	0.0265058	0.509849	0.061,0.145,0.12	0.0,0.0,0.0	0.109		unknown protein; Has 30201 Blast hits to 17322 proteins in 780 species: Archae - 12; Bacteria - 1396; Metazoa - 17338; Fungi - 3422; Plants - 5037; Viruses - 0; Other Eukaryotes - 2996 (source: NCBI BLink). [Source:TAIR;Acc:AT4G39630]
A3SS	AT1G06790	1	+	2088301	2088389	2088305	2088389	2087858	2087954	0.0265761	0.510625	1.0,1.0,0.946	0.967,0.932,0.864	0.061		RNA polymerase Rpb7 N-terminal domain-containing protein [Source:TAIR;Acc:AT1G06790]
A3SS	AT2G39250	2	-	16389601	16389680	16389601	16389674	16389826	16389954	0.026644	0.511557	1.0,1.0,1.0	1.0,0.217,1.0	0.261	SNZ	AP2-like ethylene-responsive transcription factor SNZ [Source:UniProtKB/Swiss-Prot;Acc:Q6PV67]
A3SS	AT5G43990	5	+	17698503	17698705	17698517	17698705	17697685	17698094	0.0267014	0.511996	0.479,0.734,0.821	0.71,0.518,0.269	0.179	SUVR2	Histone-lysine N-methyltransferase SUVR2 [Source:UniProtKB/Swiss-Prot;Acc:Q9FNC7]
A3SS	AT4G33770	4	-	16195121	16195357	16195121	16195203	16195928	16196428	0.0267057	0.511996	0.294,0.176,0.164	0.264,0.314,0.493	-0.146	ITPK2	Inositol-tetrakisphosphate 1-kinase 2 [Source:UniProtKB/Swiss-Prot;Acc:O81893]
A3SS	AT2G28130	2	+	11991015	11991237	11991020	11991237	11990791	11990912	0.0267674	0.512806	1.0,1.0,1.0	0.845,0.977,0.968	0.07		unknown protein; FUNCTIONS IN: molecular_function unknown; INVOLVED IN: biological_process unknown; LOCATED IN: cellular_component unknown; EXPRESSED IN: 25 plant structures; EXPRESSED DURING: 13 growth stages; Has 35333 Blast hits to 34131 proteins /.../44 species: Archae - 798; Bacteria - 22429; Metazoa - 974; Fungi - 991; Plants - 531; Viruses - 0; Other Eukaryotes - 9610 (source: NCBI BLink).…
A3SS	AT1G07600	1	-	2338903	2338997	2338903	2338990	2339265	2339321	0.0268546	0.513837	1.0,1.0,1.0	0.906,0.885,0.935	0.091	MT1A	Metallothionein-like protein 1A [Source:UniProtKB/Swiss-Prot;Acc:P43392]
A3SS	AT4G38510	4	-	18012740	18012872	18012740	18012869	18012986	18013124	0.0269791	0.515722	1.0,1.0,1.0	0.568,1.0,1.0	0.144	VHA-B2	V-type proton ATPase subunit B2 [Source:UniProtKB/Swiss-Prot;Acc:Q9SZN1]
A3SS	AT3G10810	3	-	3381847	3381921	3381847	3381918	3382018	3382718	0.0271325	0.517494	0.225,0.453,0.444	0.607,0.497,0.456	-0.146		zinc finger (C3HC4-type RING finger) family protein [Source:TAIR;Acc:AT3G10810]
A3SS	AT5G10690	5	-	3376500	3376603	3376500	3376598	3376725	3376858	0.0273091	0.519781	0.125,0.056,0.092	0.026,0.0,0.078	0.056	CBSPPR1	Pentatricopeptide repeat-containing protein At5g10690 [Source:UniProtKB/Swiss-Prot;Acc:Q8VYD6]
A3SS	AT5G47100	5	-	19131182	19131265	19131182	19131261	19131648	19131876	0.027389	0.520925	0.964,0.943,0.941	0.861,0.984,0.851	0.051	CBL9	Calcineurin B-like protein 9 [Source:UniProtKB/Swiss-Prot;Acc:Q9LTB8]
A3SS	AT3G01690	3	+	257755	257835	257770	257835	257531	257693	0.0275033	0.522722	0.804,0.533,0.733	0.849,0.82,0.888	-0.162		alpha/beta-Hydrolases superfamily protein [Source:TAIR;Acc:AT3G01690]
A3SS	AT4G36400	4	+	17198611	17198730	17198628	17198730	17198409	17198480	0.0275658	0.523531	0.827,0.903,0.894	0.771,0.793,0.84	0.073	D2HGDH	D-2-hydroxyglutarate dehydrogenase, mitochondrial [Source:UniProtKB/Swiss-Prot;Acc:O23240]
A3SS	AT4G32560	4	+	15714202	15714347	15714239	15714347	15714019	15714124	0.0276402	0.524566	0.446,0.446,1.0	1.0,0.0,0.082	0.27		paramyosin-related [Source:TAIR;Acc:AT4G32560]
A3SS	AT5G08230	5	-	2641393	2641635	2641393	2641629	2642237	2642334	0.0279347	0.5293	0.492,1.0,1.0	1.0,1.0,1.0	-0.169		HUA2-like protein 1 [Source:UniProtKB/Swiss-Prot;Acc:Q9LEY4]
A3SS	AT1G48210	1	+	17799391	17799632	17799525	17799632	17798430	17798584	0.0279757	0.529407	0.76,1.0,0.679	0.346,1.0,0.346	0.249		Protein kinase superfamily protein [Source:TAIR;Acc:AT1G48210]
A3SS	AT1G73280	1	-	27553666	27553876	27553666	27553719	27553977	27554064	0.0280583	0.53059	0.333,1.0,0.714	1.0,1.0,1.0	-0.318	SCPL3	Serine carboxypeptidase-like 3 [Source:UniProtKB/Swiss-Prot;Acc:Q9CAU1]
A3SS	AT1G48410	1	-	17890494	17890649	17890494	17890643	17890734	17890884	0.0281212	0.531017	0.452,0.521,0.568	0.553,0.62,0.603	-0.078	AGO1	Protein argonaute 1 [Source:UniProtKB/Swiss-Prot;Acc:O04379]
A3SS	AT1G10870	1	-	3617838	3617970	3617838	3617924	3618076	3618198	0.0282487	0.533043	0.658,0.793,0.315	0.248,0.434,0.088	0.332	AGD4	ADP-ribosylation factor GTPase-activating protein AGD4 [Source:UniProtKB/Swiss-Prot;Acc:Q9SMX5]
A3SS	AT5G11640	5	+	3742999	3743183	3743116	3743183	3742677	3742751	0.0283572	0.534707	1.0,0.797,1.0	1.0,1.0,0.273	0.175		Thioredoxin superfamily protein [Source:TAIR;Acc:AT5G11640]
A3SS	AT4G38330	4	+	17951675	17951818	17951751	17951818	17951469	17951585	0.0285076	0.536775	1.0,0.571,0.571	0.399,0.399,0.666	0.226		Integral membrane protein hemolysin-III homolog [Source:TAIR;Acc:AT4G38330]
A3SS	AT1G61150	1	+	22542836	22542981	22542957	22542981	22542523	22542673	0.028767	0.54086	0.709,0.663,0.646	0.624,0.602,0.487	0.102		LisH and RanBPM domains containing protein [Source:TAIR;Acc:AT1G61150]
A3SS	AT1G55250	1	+	20610177	20610249	20610181	20610249	20609536	20609697	0.0288645	0.541173	0.976,0.877,0.858	0.866,0.811,0.704	0.11	HUB2	E3 ubiquitin-protein ligase BRE1-like 2 [Source:UniProtKB/Swiss-Prot;Acc:Q9C895]
A3SS	AT5G26610	5	+	9375252	9375527	9375405	9375527	9375182	9375230	0.0289234	0.541892	0.682,0.633,0.744	0.862,0.85,0.762	-0.138		D111/G-patch domain-containing protein [Source:TAIR;Acc:AT5G26610]
A3SS	AT5G17410	5	+	5731023	5731072	5731026	5731072	5730849	5730908	0.0290879	0.543814	0.035,0.194,0.076	0.116,0.129,0.303	-0.081	GCP2	Gamma-tubulin complex component 2 [Source:UniProtKB/Swiss-Prot;Acc:Q9C5H9]
A3SS	AT1G18730	1	+	6461754	6461910	6461843	6461910	6461173	6461389	0.0290751	0.543814	0.212,0.239,0.0	0.524,0.386,1.0	-0.486	PNSB4	Photosynthetic NDH subunit of subcomplex B 4, chloroplastic [Source:UniProtKB/Swiss-Prot;Acc:Q8RXS1]
A3SS	AT1G17970	1	+	6186519	6186758	6186593	6186758	6186170	6186335	0.0291804	0.54477	1.0,1.0,0.729	0.744,0.751,1.0	0.078		RING/U-box superfamily protein [Source:TAIR;Acc:AT1G17970]
A3SS	AT2G31580	2	-	13442310	13442442	13442310	13442371	13442714	13442971	0.0294051	0.547413	0.619,0.671,0.476	0.389,0.391,0.476	0.17	THG1	tRNA(His) guanylyltransferase 1 [Source:UniProtKB/Swiss-Prot;Acc:F4IRQ5]
A3SS	AT5G08740	5	-	2850030	2850128	2850030	2850124	2850267	2850448	0.0294749	0.548326	0.153,0.155,0.053	0.168,0.225,0.151	-0.061	NDC1	NAD(P)H dehydrogenase C1 [Source:TAIR;Acc:AT5G08740]
A3SS	AT2G23980	2	-	10203940	10204040	10203940	10204031	10204387	10204467	0.0295265	0.548897	0.623,0.571,0.624	0.512,0.437,0.573	0.099	CNGC6	Probable cyclic nucleotide-gated ion channel 6 [Source:UniProtKB/Swiss-Prot;Acc:O82226]
A3SS	AT1G19010	1	+	6565782	6566045	6565865	6566045	6565493	6565630	0.0300517	0.55748	1.0,1.0,0.392	0.392,0.876,0.279	0.282		unknown protein; BEST Arabidopsis thaliana protein match is: unknown protein (TAIR:AT1G74860.1); Has 337 Blast hits to 320 proteins in 97 species: Archae - 0; Bacteria - 14; Metazoa - 153; Fungi - 26; Plants - 76; Viruses - 0; Other Eukaryotes - 68 /.../e: NCBI BLink). [Source:TAIR;Acc:AT1G19010]
A3SS	AT5G08710	5	-	2836522	2836624	2836522	2836622	2836736	2836796	0.0300956	0.557902	1.0,0.964,0.861	0.96,0.891,0.754	0.073		Regulator of chromosome condensation (RCC1) family protein [Source:TAIR;Acc:AT5G08710]
A3SS	AT1G33290	1	+	12074658	12074884	12074663	12074884	12074494	12074572	0.0302032	0.558716	0.102,0.267,0.12	0.215,0.22,0.282	-0.076		P-loop containing nucleoside triphosphate hydrolases superfamily protein [Source:TAIR;Acc:AT1G33290]
A3SS	AT1G07440	1	-	2287299	2287496	2287299	2287493	2287585	2287730	0.0301905	0.558716	1.0,1.0,1.0	0.33,1.0,0.597	0.358		Tropinone reductase homolog At1g07440 [Source:UniProtKB/Swiss-Prot;Acc:P0DKI3]
A3SS	AT1G23020	1	-	8152669	8152854	8152669	8152850	8152967	8153070	0.030978	0.570646	1.0,0.0,1.0	1.0,1.0,1.0	-0.333	FRO3	Ferric reduction oxidase 3, mitochondrial [Source:UniProtKB/Swiss-Prot;Acc:F4I4K7]
A3SS	AT3G03350	3	+	792940	793117	792988	793117	792492	792556	0.0310135	0.5709	0.288,0.057,0.038	0.038,0.098,0.0	0.082		NAD(P)-binding Rossmann-fold superfamily protein [Source:TAIR;Acc:AT3G03350]
A3SS	AT1G67785	1	-	25416068	25416182	25416068	25416178	25416879	25416984	0.0310478	0.571133	1.0,1.0,0.329	1.0,1.0,1.0	-0.224		unknown protein; Has 30 Blast hits to 30 proteins in 12 species: Archae - 0; Bacteria - 0; Metazoa - 0; Fungi - 0; Plants - 30; Viruses - 0; Other Eukaryotes - 0 (source: NCBI BLink). [Source:TAIR;Acc:AT1G67785]
A3SS	AT5G51230	5	+	20827831	20828071	20827867	20828071	20827598	20827684	0.0310711	0.571161	1.0,1.0,1.0	1.0,0.829,0.791	0.127	EMF2	Polycomb group protein EMBRYONIC FLOWER 2 [Source:UniProtKB/Swiss-Prot;Acc:Q8L6Y4]
A3SS	AT1G77350	1	+	29070492	29070655	29070495	29070655	29070252	29070363	0.0311074	0.57143	0.856,0.497,0.72	0.874,1.0,0.767	-0.189		unknown protein; FUNCTIONS IN: molecular_function unknown; INVOLVED IN: biological_process unknown; LOCATED IN: endomembrane system; EXPRESSED IN: 23 plant structures; EXPRESSED DURING: 13 growth stages; CONTAINS InterPro DOMAIN/s: Protein of unknow /.../tion KRTCAP2 (InterPro:IPR018614); Has 141 Blast hits to 141 proteins in 57 species: Archae - 0; Bacteria - 0; Metazoa - 96; Fungi - 0; Plants -…
A3SS	AT1G70530	1	-	26589729	26589945	26589729	26589909	26590034	26590169	0.0311856	0.572468	1.0,1.0,1.0	0.829,0.708,1.0	0.154	CRK3	Cysteine-rich receptor-like protein kinase 3 [Source:UniProtKB/Swiss-Prot;Acc:Q9CAL2]
A3SS	AT5G09810	5	+	3052801	3052868	3052803	3052868	3052096	3052262	0.0313225	0.574581	0.888,1.0,1.0	1.0,0.729,1.0	0.053	ACT7	Actin-7 [Source:UniProtKB/Swiss-Prot;Acc:P53492]
A3SS	AT2G39010	2	+	16291946	16292086	16291973	16292086	16291476	16291867	0.0313606	0.574879	0.124,1.0,1.0	1.0,1.0,1.0	-0.292	PIP2-6	Probable aquaporin PIP2-6 [Source:UniProtKB/Swiss-Prot;Acc:Q9ZV07]
A3SS	AT5G43500	5	+	17470785	17470903	17470794	17470903	17470581	17470647	0.0315193	0.576985	0.206,0.102,0.164	0.04,0.077,0.087	0.089	ARP9	Actin-related protein 9 [Source:UniProtKB/Swiss-Prot;Acc:Q9LSW2]
A3SS	AT3G48200	3	-	17836046	17836243	17836046	17836122	17836410	17836564	0.0318184	0.580296	1.0,1.0,1.0	0.927,0.882,1.0	0.064		unknown protein; FUNCTIONS IN: molecular_function unknown; INVOLVED IN: biological_process unknown; LOCATED IN: endomembrane system; EXPRESSED IN: 21 plant structures; EXPRESSED DURING: 13 growth stages; Has 210 Blast hits to 148 proteins in 42 spec /.../rchae - 0; Bacteria - 118; Metazoa - 0; Fungi - 0; Plants - 48; Viruses - 0; Other Eukaryotes - 44 (source: NCBI BLink). [Source:TAIR;Acc:AT3G48…
A3SS	AT1G19540	1	+	6766444	6766688	6766446	6766688	6766211	6766352	0.0318586	0.580296	1.0,1.0,0.799	1.0,1.0,1.0	-0.067		NmrA-like negative transcriptional regulator family protein [Source:TAIR;Acc:AT1G19540]
A3SS	AT5G67170	5	+	26800030	26800131	26800033	26800131	26799765	26799901	0.0319718	0.581614	0.899,0.881,0.874	0.707,0.849,0.738	0.12		SEC-C motif-containing protein / OTU-like cysteine protease family protein [Source:TAIR;Acc:AT5G67170]
A3SS	AT3G56380	3	+	20906093	20906167	20906096	20906167	20905897	20905975	0.031993	0.581614	1.0,1.0,0.798	1.0,0.831,0.497	0.157	ARR17	Two-component response regulator ARR17 [Source:UniProtKB/Swiss-Prot;Acc:Q9FPR6]
A3SS	AT4G11420	4	-	6949266	6949463	6949266	6949455	6949563	6949785	0.0324598	0.586724	0.761,1.0,1.0	1.0,1.0,1.0	-0.08	TIF3A1	Eukaryotic translation initiation factor 3 subunit A [Source:UniProtKB/Swiss-Prot;Acc:Q9LD55]
A3SS	AT1G66730	1	+	24889921	24890134	24890026	24890134	24889691	24889851	0.0324453	0.586724	0.069,0.045,0.04	0.054,0.083,0.183	-0.055	AtLIG6	DNA LIGASE 6 [Source:TAIR;Acc:AT1G66730]
A3SS	AT3G51460	3	+	19095259	19095353	19095310	19095353	19095100	19095187	0.0324687	0.586724	1.0,0.907,0.857	1.0,1.0,1.0	-0.079	SAC7	Phosphoinositide phosphatase SAC7 [Source:UniProtKB/Swiss-Prot;Acc:Q9C5G5]
A3SS	AT2G19600	2	+	8482225	8482341	8482245	8482341	8482090	8482144	0.0324088	0.586724	0.037,0.014,0.206	0.034,0.015,0.018	0.063	KEA4	K(+) efflux antiporter 4 [Source:UniProtKB/Swiss-Prot;Acc:Q9ZUN3]
A3SS	AT1G01020	1	-	7761	7852	7761	7831	7941	7987	0.0329036	0.592851	1.0,1.0,0.815	1.0,0.726,0.851	0.079	ARV1	Arv1-like protein [Source:TAIR;Acc:AT1G01020]
A3SS	AT5G44600	5	+	17990778	17990911	17990781	17990911	17990612	17990690	0.0329959	0.593984	0.425,0.283,0.198	0.0,0.141,0.283	0.161		S-adenosyl-L-methionine-dependent methyltransferases superfamily protein [Source:TAIR;Acc:AT5G44600]
A3SS	AT5G38420	5	-	15381582	15381696	15381582	15381693	15381807	15382035	0.0330116	0.593984	0.875,0.989,0.741	1.0,0.903,0.889	-0.062	RBCS-2B	Ribulose bisphosphate carboxylase small chain 2B, chloroplastic [Source:UniProtKB/Swiss-Prot;Acc:P10797]
A3SS	AT5G57160	5	-	23156162	23156321	23156162	23156315	23156412	23156574	0.0331647	0.595405	0.825,1.0,1.0	1.0,1.0,1.0	-0.058	LIG4	DNA ligase 4 [Source:UniProtKB/Swiss-Prot;Acc:Q9LL84]
A3SS	AT5G43320	5	-	17386657	17386783	17386657	17386704	17386922	17386986	0.033181	0.595405	0.766,1.0,1.0	0.814,1.0,0.788	0.055	ckl8	casein kinase I-like 8 [Source:TAIR;Acc:AT5G43320]
A3SS	AT1G62130	1	-	22964539	22964664	22964539	22964615	22965138	22965318	0.0332747	0.596273	0.185,0.0,0.296	0.431,0.464,0.178	-0.197		AAA-type ATPase family protein [Source:TAIR;Acc:AT1G62130]
A3SS	AT1G34065	1	-	12399557	12399777	12399557	12399770	12399992	12400083	0.033303	0.596375	0.841,0.871,1.0	0.841,1.0,0.445	0.142	SAMC2	Probable S-adenosylmethionine carrier 2, chloroplastic [Source:UniProtKB/Swiss-Prot;Acc:F4HT41]
A3SS	AT1G71240	1	+	26857121	26857292	26857126	26857292	26856616	26856796	0.0334111	0.597093	0.155,0.022,0.075	0.178,0.179,0.14	-0.082		Plant protein of unknown function (DUF639) [Source:TAIR;Acc:AT1G71240]
A3SS	AT5G03910	5	-	1054779	1054954	1054779	1054926	1055063	1055149	0.0333945	0.597093	1.0,1.0,1.0	1.0,0.738,1.0	0.087	ABCB29	ABC transporter B family member 29, chloroplastic [Source:UniProtKB/Swiss-Prot;Acc:Q9LZB8]
A3SS	AT1G75310	1	+	28265177	28265202	28265180	28265202	28261587	28265089	0.0335572	0.598485	0.966,0.858,0.81	0.791,0.826,0.675	0.114	AUL1	auxin-like 1 protein [Source:TAIR;Acc:AT1G75310]
A3SS	AT3G02030	3	+	346215	346351	346244	346351	345920	346025	0.033545	0.598485	1.0,0.457,0.359	0.296,0.0,0.457	0.354		transferases, transferring acyl groups other than amino-acyl groups;acyltransferases [Source:TAIR;Acc:AT3G02030]
A3SS	AT2G02410	2	+	633593	633791	633627	633791	633399	633524	0.0336361	0.599082	0.16,0.125,0.046	0.101,0.039,0.0	0.064		unknown protein; CONTAINS InterPro DOMAIN/s: Protein of unknown function DUF901 (InterPro:IPR010298); Has 1151 Blast hits to 1151 proteins in 597 species: Archae - 0; Bacteria - 1105; Metazoa - 0; Fungi - 0; Plants - 42; Viruses - 0; Other Eukaryote /.../(source: NCBI BLink). [Source:TAIR;Acc:AT2G02410]
A3SS	AT2G25740	2	+	10980440	10980688	10980620	10980688	10980121	10980344	0.0336694	0.599269	0.143,0.041,0.077	0.116,0.205,0.149	-0.07		ATP-dependent protease La (LON) domain protein [Source:TAIR;Acc:AT2G25740]
A3SS	AT2G34170	2	+	14430327	14430366	14430333	14430366	14430012	14430105	0.0340413	0.604256	0.244,0.492,1.0	1.0,0.871,1.0	-0.378		Protein of unknown function (DUF688) [Source:TAIR;Acc:AT2G34170]
A3SS	AT3G13000	3	-	4160809	4161096	4160809	4161021	4161806	4162065	0.0341577	0.605008	1.0,1.0,1.0	0.923,1.0,0.887	0.063		Protein of unknown function, DUF547 [Source:TAIR;Acc:AT3G13000]
A3SS	AT3G24010	3	-	8676772	8676853	8676772	8676836	8677001	8677189	0.0342645	0.606175	0.142,0.231,0.204	0.092,0.149,0.12	0.072	ING1	PHD finger protein ING1 [Source:UniProtKB/Swiss-Prot;Acc:Q9LIQ6]
A3SS	AT5G05310	5	+	1571874	1571985	1571881	1571985	1571702	1571792	0.0344684	0.608558	0.472,0.348,0.729	0.31,0.248,0.366	0.208		TLC ATP/ADP transporter [Source:TAIR;Acc:AT5G05310]
A3SS	AT5G56620	5	-	22918520	22918633	22918520	22918627	22918924	22919167	0.0344948	0.608615	1.0,1.0,1.0	1.0,0.926,0.629	0.148	anac099	NAC domain containing protein 99 [Source:TAIR;Acc:AT5G56620]
A3SS	AT4G39080	4	+	18210964	18211152	18210981	18211152	18210783	18210891	0.0346427	0.610724	0.73,0.558,0.783	0.644,0.114,0.419	0.298	VHA-A3	V-type proton ATPase subunit a3 [Source:UniProtKB/Swiss-Prot;Acc:Q8W4S4]
A3SS	AT5G26850	5	+	9445935	9446084	9445943	9446084	9445311	9445530	0.0348015	0.612385	0.746,0.789,0.831	0.738,0.595,0.697	0.112		Uncharacterized protein [Source:TAIR;Acc:AT5G26850]
A3SS	AT1G13390	1	-	4593394	4593683	4593394	4593561	4594110	4594391	0.0348556	0.612928	0.958,0.906,0.907	0.879,0.872,0.789	0.077		unknown protein; BEST Arabidopsis thaliana protein match is: unknown protein (TAIR:AT1G68490.1); Has 114 Blast hits to 114 proteins in 18 species: Archae - 0; Bacteria - 0; Metazoa - 0; Fungi - 0; Plants - 114; Viruses - 0; Other Eukaryotes - 0 (sou /.../CBI BLink). [Source:TAIR;Acc:AT1G13390]
A3SS	AT2G01220	2	+	125577	125698	125591	125698	124813	124907	0.0352276	0.618232	0.0,0.58,0.38	1.0,0.479,0.0	-0.173		Nucleotidylyl transferase superfamily protein [Source:TAIR;Acc:AT2G01220]
A3SS	AT3G21260	3	-	7464729	7464905	7464729	7464860	7465018	7465094	0.0353102	0.619268	0.794,0.885,1.0	0.607,0.73,0.755	0.196	GLTP3	Glycolipid transfer protein 3 [Source:UniProtKB/Swiss-Prot;Acc:Q9LU33]
A3SS	AT2G25080	2	+	10669799	10670019	10669802	10670019	10669545	10669713	0.0353844	0.620157	1.0,1.0,1.0	1.0,0.141,1.0	0.286	GPX1	Phospholipid hydroperoxide glutathione peroxidase 1, chloroplastic [Source:UniProtKB/Swiss-Prot;Acc:P52032]
A3SS	AT1G64230	1	+	23833769	23833861	23833772	23833861	23833550	23833672	0.0354134	0.620241	0.577,0.361,1.0	0.33,0.513,0.11	0.328	UBC28	Ubiquitin-conjugating enzyme E2 28 [Source:UniProtKB/Swiss-Prot;Acc:Q94F47]
A3SS	AT4G04740	4	-	2404217	2404311	2404217	2404242	2404441	2404468	0.0355776	0.620241	0.407,1.0,1.0	0.333,0.164,0.462	0.483	CPK23	Calcium-dependent protein kinase 23 [Source:UniProtKB/Swiss-Prot;Acc:Q9M101]
A3SS	AT4G17360	4	-	9703943	9704010	9703943	9703997	9704082	9704266	0.0354593	0.620241	1.0,0.874,0.902	1.0,1.0,1.0	-0.075	PURU2	Formyltetrahydrofolate deformylase 2, mitochondrial [Source:UniProtKB/Swiss-Prot;Acc:F4JP46]
A3SS	AT4G29860	4	-	14605267	14605510	14605267	14605496	14605600	14605796	0.0356558	0.620428	0.042,0.031,0.219	0.229,0.315,0.127	-0.126	DSE1	Protein DECREASED SIZE EXCLUSION LIMIT 1 [Source:UniProtKB/Swiss-Prot;Acc:Q3MV14]
A3SS	AT1G32150	1	+	11565943	11566120	11565986	11566120	11565517	11565672	0.0356795	0.620428	0.857,0.984,0.866	0.914,1.0,0.968	-0.058	bZIP68	basic region/leucine zipper transcription factor 68 [Source:TAIR;Acc:AT1G32150]
A3SS	AT1G69935	1	-	26342609	26342834	26342609	26342826	26342914	26343126	0.0357319	0.620877	0.859,0.839,0.925	0.814,0.741,0.869	0.066	SHW1	short hypocotyl in white light1 [Source:TAIR;Acc:AT1G69935]
A3SS	AT5G06960	5	+	2155660	2155807	2155676	2155807	2154779	2155045	0.0358493	0.622096	0.949,0.746,0.946	0.817,0.833,0.716	0.092	TGA5	Transcription factor TGA5 [Source:UniProtKB/Swiss-Prot;Acc:Q39163]
A3SS	AT2G40630	2	+	16960105	16960220	16960157	16960220	16959772	16959883	0.0358378	0.622096	0.239,0.367,0.343	0.258,0.089,0.192	0.137		Uncharacterised conserved protein (UCP030365) [Source:TAIR;Acc:AT2G40630]
A3SS	AT5G56160	5	+	22732336	22732450	22732376	22732450	22731973	22732153	0.036158	0.626627	0.248,0.0,0.0	0.09,0.0,0.0	0.053	SFH14	Phosphatidylinositol/phosphatidylcholine transfer protein SFH14 [Source:UniProtKB/Swiss-Prot;Acc:F4K6D3]
A3SS	AT5G56850	5	-	22986935	22987029	22986935	22986988	22987116	22987320	0.0362484	0.627781	0.774,0.927,0.825	0.657,0.696,0.786	0.129		unknown protein; EXPRESSED IN: 21 plant structures; EXPRESSED DURING: 13 growth stages; Has 35333 Blast hits to 34131 proteins in 2444 species: Archae - 798; Bacteria - 22429; Metazoa - 974; Fungi - 991; Plants - 531; Viruses - 0; Other Eukaryotes - /.../(source: NCBI BLink). [Source:TAIR;Acc:AT5G56850]
A3SS	AT5G56130	5	-	22724807	22724903	22724807	22724893	22725013	22725095	0.0364008	0.62918	1.0,0.85,1.0	1.0,0.32,1.0	0.177	THO3	THO complex subunit 3 [Source:UniProtKB/Swiss-Prot;Acc:Q9FKT5]
A3SS	AT3G19640	3	+	6821689	6821899	6821695	6821899	6820925	6821400	0.0365757	0.630124	1.0,1.0,1.0	1.0,0.537,1.0	0.154	MRS2-3	Magnesium transporter MRS2-3 [Source:UniProtKB/Swiss-Prot;Acc:Q9LJN2]
A3SS	AT5G45920	5	+	18623122	18623350	18623148	18623350	18622758	18622923	0.036592	0.630124	1.0,1.0,1.0	0.918,1.0,0.853	0.076		GDSL esterase/lipase At5g45920 [Source:UniProtKB/Swiss-Prot;Acc:Q6NMR9]
A3SS	AT1G59840	1	+	22027762	22027995	22027800	22027995	22027494	22027676	0.0365218	0.630124	0.8,0.8,0.822	0.875,1.0,0.884	-0.112	CCB4	cofactor assembly of complex C [Source:TAIR;Acc:AT1G59840]
A3SS	AT5G42770	5	+	17152681	17152762	17152713	17152762	17152529	17152604	0.0368377	0.63258	1.0,1.0,1.0	0.674,0.921,1.0	0.135		Maf-like protein [Source:TAIR;Acc:AT5G42770]
A3SS	AT1G50730	1	+	18798069	18798268	18798076	18798268	18797732	18797896	0.0368936	0.633127	0.121,0.171,0.161	0.138,0.058,0.036	0.074		unknown protein; Has 218 Blast hits to 209 proteins in 78 species: Archae - 0; Bacteria - 0; Metazoa - 141; Fungi - 2; Plants - 33; Viruses - 0; Other Eukaryotes - 42 (source: NCBI BLink). [Source:TAIR;Acc:AT1G50730]
A3SS	AT5G06180	5	+	1874522	1874635	1874575	1874635	1874304	1874431	0.0371217	0.636213	0.932,0.788,1.0	1.0,0.899,1.0	-0.06		Protein of unknown function (DUF1022) [Source:TAIR;Acc:AT5G06180]
A3SS	AT1G47870	1	+	17635729	17635789	17635732	17635789	17635431	17635618	0.0371171	0.636213	1.0,1.0,1.0	0.843,1.0,1.0	0.052	E2FC	Transcription factor E2FC [Source:UniProtKB/Swiss-Prot;Acc:Q9FV70]
A3SS	AT5G07270	5	+	2282387	2282566	2282422	2282566	2282261	2282308	0.0371837	0.636447	0.162,0.054,0.108	0.2,0.169,0.13	-0.058	XBAT33	E3 ubiquitin-protein ligase XBAT33 [Source:UniProtKB/Swiss-Prot;Acc:Q4FE45]
A3SS	AT1G71240	1	+	26856600	26856796	26856632	26856796	26856331	26856439	0.0372213	0.636451	0.096,0.0,0.253	0.04,0.079,0.023	0.069		Plant protein of unknown function (DUF639) [Source:TAIR;Acc:AT1G71240]
A3SS	AT4G16620	4	-	9359254	9359386	9359254	9359355	9359513	9359579	0.0372322	0.636451	1.0,1.0,1.0	0.806,0.769,0.769	0.219		WAT1-related protein At4g16620 [Source:UniProtKB/Swiss-Prot;Acc:F4JMI7]
A3SS	AT5G27860	5	-	9875400	9875539	9875400	9875445	9875644	9875707	0.037281	0.636459	0.654,0.801,0.628	0.803,0.774,0.756	-0.083		unknown protein; FUNCTIONS IN: molecular_function unknown; INVOLVED IN: biological_process unknown; LOCATED IN: chloroplast; EXPRESSED IN: pollen tube; Has 35333 Blast hits to 34131 proteins in 2444 species: Archae - 798; Bacteria - 22429; Metazoa - /.../Fungi - 991; Plants - 531; Viruses - 0; Other Eukaryotes - 9610 (source: NCBI BLink). [Source:TAIR;Acc:AT5G27860]
A3SS	AT4G08280	4	+	5231125	5231244	5231158	5231244	5230963	5231053	0.0373148	0.636623	0.868,0.647,0.843	0.822,1.0,0.908	-0.124		Thioredoxin superfamily protein [Source:TAIR;Acc:AT4G08280]
A3SS	AT4G25500	4	+	13026017	13026168	13026055	13026168	13025599	13025856	0.0373737	0.637216	0.205,0.078,0.125	0.051,0.058,0.095	0.068	RS40	Serine/arginine-rich splicing factor RS40 [Source:UniProtKB/Swiss-Prot;Acc:P92965]
A3SS	AT4G17360	4	-	9703943	9704023	9703943	9703958	9704082	9704181	0.0374308	0.637777	0.677,0.83,0.449	1.0,0.808,0.677	-0.176	PURU2	Formyltetrahydrofolate deformylase 2, mitochondrial [Source:UniProtKB/Swiss-Prot;Acc:F4JP46]
A3SS	AT3G48200	3	-	17836046	17836212	17836046	17836122	17836362	17836564	0.0376178	0.639309	1.0,1.0,1.0	0.799,0.862,0.922	0.139		unknown protein; FUNCTIONS IN: molecular_function unknown; INVOLVED IN: biological_process unknown; LOCATED IN: endomembrane system; EXPRESSED IN: 21 plant structures; EXPRESSED DURING: 13 growth stages; Has 210 Blast hits to 148 proteins in 42 spec /.../rchae - 0; Bacteria - 118; Metazoa - 0; Fungi - 0; Plants - 48; Viruses - 0; Other Eukaryotes - 44 (source: NCBI BLink). [Source:TAIR;Acc:AT3G48…
A3SS	AT3G43220	3	-	15201184	15201331	15201184	15201261	15201606	15201778	0.0376989	0.639979	0.086,0.1,0.182	0.083,0.079,0.042	0.055	SAC3	Phosphoinositide phosphatase SAC3 [Source:UniProtKB/Swiss-Prot;Acc:Q7XZU2]
A3SS	AT1G80420	1	-	30236021	30236130	30236021	30236089	30236227	30236313	0.0377058	0.639979	0.364,0.496,0.334	0.372,0.09,0.208	0.175	XRCC1	DNA-repair protein XRCC1 [Source:UniProtKB/Swiss-Prot;Acc:Q24JK4]
A3SS	AT1G09840	1	-	3199380	3199978	3199380	3199619	3200035	3200291	0.0378609	0.640959	0.25,0.173,0.207	0.217,0.408,0.343	-0.113	ASK10	Shaggy-related protein kinase kappa [Source:UniProtKB/Swiss-Prot;Acc:Q39019]
A3SS	AT5G36940	5	+	14592395	14592462	14592412	14592462	14592230	14592303	0.0379099	0.641376	0.924,0.8,0.938	0.807,0.8,0.814	0.08	CAT3	Cationic amino acid transporter 3, mitochondrial [Source:UniProtKB/Swiss-Prot;Acc:Q8GYB4]
A3SS	AT5G58100	5	+	23514344	23514438	23514359	23514438	23514055	23514224	0.0381853	0.645207	0.615,1.0,1.0	1.0,0.478,0.439	0.233		unknown protein; INVOLVED IN: pollen exine formation; EXPRESSED IN: 19 plant structures; EXPRESSED DURING: 8 growth stages; BEST Arabidopsis thaliana protein match is: unknown protein (TAIR:AT3G28720.1); Has 35333 Blast hits to 34131 proteins in 244 /.../ies: Archae - 798; Bacteria - 22429; Metazoa - 974; Fungi - 991; Plants - 531; Viruses - 0; Other Eukaryotes - 9610 (source: NCBI BLink). [Sourc…
A3SS	AT2G33240	2	-	14093614	14093668	14093614	14093652	14093765	14093867	0.0382422	0.645222	0.0,0.0,0.0	0.845,0.0,0.0	-0.282	XI-D	Myosin-10 [Source:UniProtKB/Swiss-Prot;Acc:F4IVR7]
A3SS	AT1G64110	1	-	23799367	23799438	23799367	23799432	23799521	23799613	0.0385245	0.648142	1.0,0.659,0.492	0.53,0.458,0.659	0.168		P-loop containing nucleoside triphosphate hydrolases superfamily protein [Source:TAIR;Acc:AT1G64110]
A3SS	AT1G65950	1	-	24550238	24550309	24550238	24550305	24550385	24550526	0.0385535	0.648142	0.674,0.614,1.0	0.595,0.434,0.583	0.225		Protein kinase superfamily protein [Source:TAIR;Acc:AT1G65950]
A3SS	AT5G22860	5	-	7641970	7642104	7641970	7642085	7642267	7642449	0.0386232	0.648861	0.885,0.915,1.0	1.0,0.786,0.853	0.054		Serine carboxypeptidase S28 family protein [Source:TAIR;Acc:AT5G22860]
A3SS	AT3G60310	3	+	22288646	22288887	22288683	22288887	22288369	22288544	0.0387606	0.649926	0.793,0.502,0.899	0.518,0.392,0.573	0.237		unknown protein; Has 22 Blast hits to 18 proteins in 9 species: Archae - 0; Bacteria - 0; Metazoa - 0; Fungi - 0; Plants - 22; Viruses - 0; Other Eukaryotes - 0 (source: NCBI BLink). [Source:TAIR;Acc:AT3G60310]
A3SS	AT1G01920	1	+	317759	317860	317764	317860	317560	317642	0.0392706	0.656804	0.215,0.277,0.057	0.17,0.073,0.032	0.091		SET domain-containing protein [Source:TAIR;Acc:AT1G01920]
A3SS	AT1G73350	1	-	27576238	27576345	27576238	27576339	27576430	27576479	0.0393054	0.656825	0.819,0.807,0.916	0.648,0.679,0.886	0.11		unknown protein; FUNCTIONS IN: molecular_function unknown; INVOLVED IN: biological_process unknown; LOCATED IN: nucleus; EXPRESSED IN: 25 plant structures; EXPRESSED DURING: 15 growth stages; Has 46 Blast hits to 46 proteins in 19 species: Archae - /.../teria - 0; Metazoa - 3; Fungi - 3; Plants - 36; Viruses - 0; Other Eukaryotes - 4 (source: NCBI BLink). [Source:TAIR;Acc:AT1G73350]
A3SS	AT3G09600	3	+	2948151	2948296	2948168	2948296	2947923	2947983	0.0400177	0.665076	0.73,1.0,1.0	0.751,1.0,0.73	0.083	RVE8	Protein REVEILLE 8 [Source:UniProtKB/Swiss-Prot;Acc:Q8RWU3]
A3SS	AT1G17140	1	-	5858247	5858446	5858247	5858310	5858452	5858550	0.039999	0.665076	0.252,0.344,0.259	0.377,0.386,0.426	-0.111	ICR1	Interactor of constitutive active ROPs 1 [Source:UniProtKB/Swiss-Prot;Acc:Q8LE98]
A3SS	AT2G07050	2	+	2928313	2928449	2928316	2928449	2927859	2927973	0.0400611	0.665378	0.734,1.0,1.0	0.721,0.526,1.0	0.162	CAS1	Cycloartenol synthase [Source:UniProtKB/Swiss-Prot;Acc:P38605]
A3SS	AT3G62310	3	-	23058276	23058506	23058276	23058402	23058773	23059858	0.0401375	0.665807	0.195,0.173,0.269	0.29,0.27,0.269	-0.064		RNA helicase family protein [Source:TAIR;Acc:AT3G62310]
A3SS	AT4G21410	4	-	11403953	11404099	11403953	11404077	11404190	11405056	0.0402037	0.666067	1.0,1.0,1.0	0.412,1.0,1.0	0.196	CRK29	Cysteine-rich receptor-like protein kinase 29 [Source:UniProtKB/Swiss-Prot;Acc:Q8S9L6]
A3SS	AT2G41350	2	+	17233088	17233229	17233091	17233229	17232471	17232595	0.0403706	0.666938	0.178,0.122,0.048	0.057,0.077,0.044	0.057		unknown protein; BEST Arabidopsis thaliana protein match is: unknown protein (TAIR:AT2G21980.1); Has 188 Blast hits to 188 proteins in 66 species: Archae - 0; Bacteria - 12; Metazoa - 90; Fungi - 15; Plants - 54; Viruses - 0; Other Eukaryotes - 17 ( /.../: NCBI BLink). [Source:TAIR;Acc:AT2G41350]
A3SS	AT3G14080	3	+	4667615	4667777	4667634	4667777	4667364	4667491	0.0403829	0.666938	0.817,1.0,0.572	1.0,1.0,0.728	-0.113	LSM1B	Sm-like protein LSM1B [Source:UniProtKB/Swiss-Prot;Acc:Q8LFL8]
A3SS	AT1G77810	1	-	29262209	29262388	29262209	29262379	29262481	29262540	0.040329	0.666938	0.72,0.655,0.701	0.573,0.516,0.563	0.141	B3GALT7	Beta-1,3-galactosyltransferase 7 [Source:UniProtKB/Swiss-Prot;Acc:Q6NQB7]
A3SS	AT3G62000	3	-	22960048	22960120	22960048	22960116	22960389	22960515	0.0403566	0.666938	0.308,0.335,0.329	0.205,0.256,0.189	0.107		S-adenosyl-L-methionine-dependent methyltransferases superfamily protein [Source:TAIR;Acc:AT3G62000]
A3SS	AT3G26670	3	-	9800469	9800684	9800469	9800661	9800814	9801169	0.0404125	0.667008	0.264,0.201,0.37	0.198,0.122,0.215	0.1		Probable magnesium transporter NIPA8 [Source:UniProtKB/Swiss-Prot;Acc:Q8RWF4]
A3SS	AT3G26840	3	+	9893282	9893351	9893320	9893351	9892793	9893189	0.0404485	0.667185	0.636,0.762,0.849	0.445,1.0,1.0	-0.066		Acyltransferase-like protein At3g26840, chloroplastic [Source:UniProtKB/Swiss-Prot;Acc:Q9LW26]
A3SS	AT4G29890	4	+	14609742	14609964	14609748	14609964	14609595	14609670	0.0406848	0.67028	0.209,0.06,0.036	0.268,0.09,0.152	-0.068		Choline monooxygenase, chloroplastic [Source:UniProtKB/Swiss-Prot;Acc:Q9SZR0]
A3SS	AT5G58720	5	-	23720733	23720954	23720733	23720935	23721193	23721420	0.0409107	0.673124	0.472,0.349,0.229	0.877,0.588,0.534	-0.316		smr (Small MutS Related) domain-containing protein [Source:TAIR;Acc:AT5G58720]
A3SS	AT5G21950	5	-	7254600	7254707	7254600	7254696	7255230	7255944	0.0411737	0.676298	0.067,0.0,0.238	0.0,0.0,0.082	0.074		alpha/beta-Hydrolases superfamily protein [Source:TAIR;Acc:AT5G21950]
A3SS	AT1G66980	1	-	24999098	24999259	24999098	24999186	24999393	24999573	0.0415247	0.679845	0.879,0.755,0.708	0.366,0.793,0.661	0.174	GDPDL2	Glycerophosphodiester phosphodiesterase protein kinase domain-containing GDPDL2 [Source:UniProtKB/Swiss-Prot;Acc:D7SFH9]
A3SS	AT4G21534	4	+	11457400	11457509	11457422	11457509	11457224	11457297	0.041939	0.684483	0.0,0.035,0.066	0.042,0.226,0.0	-0.056	SPHK2	Sphingosine kinase 2 [Source:UniProtKB/Swiss-Prot;Acc:F2Y4A3]
A3SS	AT1G50970	1	+	18896476	18896628	18896564	18896628	18896322	18896371	0.0425533	0.691085	0.936,0.688,1.0	1.0,1.0,1.0	-0.125		Vacuolar protein sorting-associated protein 53 B [Source:UniProtKB/Swiss-Prot;Acc:F4I7Y2]
A3SS	AT4G04620	4	-	2329889	2329980	2329889	2329943	2330059	2330200	0.0426172	0.691696	0.392,0.23,0.27	0.383,0.38,0.434	-0.102	ATG8B	Autophagy-related protein 8b [Source:UniProtKB/Swiss-Prot;Acc:Q9XEB5]
A3SS	AT1G54680	1	+	20413943	20414015	20413961	20414015	20413735	20413869	0.0430498	0.697857	0.878,0.971,1.0	0.759,0.972,0.81	0.103		unknown protein; FUNCTIONS IN: molecular_function unknown; INVOLVED IN: biological_process unknown; LOCATED IN: endomembrane system; EXPRESSED IN: 22 plant structures; EXPRESSED DURING: 13 growth stages; BEST Arabidopsis thaliana protein match is: u /.../ protein (TAIR:AT5G27290.1); Has 200 Blast hits to 200 proteins in 57 species: Archae - 0; Bacteria - 59; Metazoa - 0; Fungi - 0; Plants - 127; …
A3SS	AT3G46200	3	+	16969981	16970040	16969992	16970040	16969787	16969873	0.0430974	0.698199	0.961,0.84,0.6	0.789,0.652,0.464	0.165	NUDT9	Nudix hydrolase 9 [Source:UniProtKB/Swiss-Prot;Acc:Q8VYR2]
A3SS	AT2G22140	2	-	9415904	9416023	9415904	9415979	9416128	9416183	0.0433913	0.70008	1.0,1.0,1.0	0.28,0.7,1.0	0.34	EME1B	Crossover junction endonuclease EME1B [Source:UniProtKB/Swiss-Prot;Acc:C5H8J1]
A3SS	AT4G15563	4	+	8891740	8891998	8891749	8891998	8891078	8891249	0.0433995	0.70008	0.0,0.24,0.322	0.281,0.338,0.281	-0.113		unknown protein; Has 36 Blast hits to 36 proteins in 12 species: Archae - 0; Bacteria - 0; Metazoa - 0; Fungi - 0; Plants - 36; Viruses - 0; Other Eukaryotes - 0 (source: NCBI BLink). [Source:TAIR;Acc:AT4G15563]
A3SS	AT1G56230	1	-	21046667	21046824	21046667	21046819	21046903	21047018	0.0433074	0.70008	0.149,0.036,0.114	0.191,0.126,0.147	-0.055		Protein of unknown function (DUF1399) [Source:TAIR;Acc:AT1G56230]
A3SS	AT1G78670	1	+	29593084	29593172	29593088	29593172	29592905	29592994	0.04377	0.70433	0.887,0.831,1.0	1.0,1.0,1.0	-0.094	GGH3	Probable gamma-glutamyl hydrolase 3 [Source:UniProtKB/Swiss-Prot;Acc:Q9ZV85]
A3SS	AT2G43400	2	+	18023632	18023746	18023659	18023746	18023327	18023420	0.0438329	0.704881	0.646,0.613,0.546	0.309,0.502,0.46	0.178	ETFQO	Electron transfer flavoprotein-ubiquinone oxidoreductase, mitochondrial [Source:UniProtKB/Swiss-Prot;Acc:O22854]
A3SS	AT3G21350	3	+	7517980	7518103	7518057	7518103	7517682	7517894	0.0438771	0.704881	0.0,0.0,1.0	0.153,0.249,0.306	0.097	MED6	Mediator of RNA polymerase II transcription subunit 6 [Source:UniProtKB/Swiss-Prot;Acc:F4IXJ7]
A3SS	AT5G48335	5	+	19588578	19588740	19588621	19588740	19588227	19588259	0.0440812	0.706153	0.886,0.845,0.835	0.701,0.632,0.741	0.164		unknown protein; FUNCTIONS IN: molecular_function unknown; INVOLVED IN: biological_process unknown; LOCATED IN: chloroplast; BEST Arabidopsis thaliana protein match is: unknown protein (TAIR:AT3G07580.1); Has 35333 Blast hits to 34131 proteins in 24 /.../cies: Archae - 798; Bacteria - 22429; Metazoa - 974; Fungi - 991; Plants - 531; Viruses - 0; Other Eukaryotes - 9610 (source: NCBI BLink). [Sour…
A3SS	AT3G13180	3	-	4238413	4238510	4238413	4238500	4238595	4238679	0.0441083	0.706153	0.116,0.371,0.036	0.178,0.299,0.315	-0.09		NOL1/NOP2/sun family protein / antitermination NusB domain-containing protein [Source:TAIR;Acc:AT3G13180]
A3SS	AT1G12930	1	-	4401615	4401695	4401615	4401687	4401778	4401892	0.0440476	0.706153	0.687,0.928,0.939	1.0,0.945,0.882	-0.091		ARM repeat superfamily protein [Source:TAIR;Acc:AT1G12930]
A3SS	AT4G02260	4	+	988615	988681	988618	988681	988442	988503	0.0442364	0.706228	0.441,0.395,0.323	0.33,0.253,0.31	0.089	RSH1	Putative GTP diphosphokinase RSH1, chloroplastic [Source:UniProtKB/Swiss-Prot;Acc:P0DKG8]
A3SS	AT3G26420	3	+	9671949	9672063	9671952	9672063	9671516	9671605	0.044222	0.706228	0.324,0.329,0.295	0.237,0.326,0.208	0.059	RZ1A	Glycine-rich RNA-binding protein RZ1A [Source:UniProtKB/Swiss-Prot;Acc:Q9LIN3]
A3SS	AT2G40630	2	+	16959971	16960220	16960105	16960220	16959772	16959883	0.0445401	0.709785	0.388,0.15,0.0	0.346,1.0,0.346	-0.385		Uncharacterised conserved protein (UCP030365) [Source:TAIR;Acc:AT2G40630]
A3SS	AT3G25840	3	-	9456873	9456982	9456873	9456929	9457089	9457554	0.0447751	0.711541	0.175,0.308,0.357	0.11,0.105,0.198	0.142		Protein kinase superfamily protein [Source:TAIR;Acc:AT3G25840]
A3SS	AT4G00590	4	+	254368	254495	254375	254495	254110	254274	0.0452244	0.716475	0.871,0.852,0.794	1.0,0.862,0.939	-0.095		Putative threonine aspartase [Source:UniProtKB/Swiss-Prot;Acc:O65268]
A3SS	AT4G11820	4	-	7111838	7112030	7111838	7111995	7112442	7112480	0.0453317	0.717194	0.655,1.0,0.65	0.746,0.976,1.0	-0.139	HMGS	Hydroxymethylglutaryl-CoA synthase [Source:UniProtKB/Swiss-Prot;Acc:P54873]
A3SS	AT1G43620	1	-	16429642	16429754	16429642	16429749	16430028	16430200	0.0454119	0.718032	0.388,0.661,0.532	0.15,0.181,0.6	0.217	UGT80B1	Sterol 3-beta-glucosyltransferase UGT80B1 [Source:UniProtKB/Swiss-Prot;Acc:Q9XIG1]
A3SS	AT5G27860	5	-	9875400	9875541	9875400	9875445	9875644	9875707	0.0455424	0.719121	0.667,0.797,0.631	0.802,0.773,0.752	-0.077		unknown protein; FUNCTIONS IN: molecular_function unknown; INVOLVED IN: biological_process unknown; LOCATED IN: chloroplast; EXPRESSED IN: pollen tube; Has 35333 Blast hits to 34131 proteins in 2444 species: Archae - 798; Bacteria - 22429; Metazoa - /.../Fungi - 991; Plants - 531; Viruses - 0; Other Eukaryotes - 9610 (source: NCBI BLink). [Source:TAIR;Acc:AT5G27860]
A3SS	AT3G11230	3	+	3516677	3516877	3516761	3516877	3516576	3516675	0.0455561	0.719121	0.059,0.154,0.027	0.134,0.206,0.111	-0.07		Protein yippee-like At3g11230 [Source:UniProtKB/Swiss-Prot;Acc:Q9C777]
A3SS	AT5G08110	5	-	2596923	2597025	2596923	2596999	2597100	2597208	0.0455627	0.719121	0.0,0.109,0.329	0.0,0.0,0.029	0.136		nucleic acid binding;ATP-dependent helicases;ATP binding;helicases;ATP-dependent helicases [Source:TAIR;Acc:AT5G08110]
A3SS	AT4G27370	4	-	13695335	13695535	13695335	13695494	13695618	13695734	0.0459716	0.724706	1.0,0.0,1.0	1.0,1.0,1.0	-0.333	VIII-B	Myosin-4 [Source:UniProtKB/Swiss-Prot;Acc:F4JIU4]
A3SS	AT5G47690	5	+	19322279	19322464	19322316	19322464	19322087	19322214	0.0461459	0.727019	0.707,0.547,1.0	0.801,0.518,0.0	0.312		binding [Source:TAIR;Acc:AT5G47690]
A3SS	AT1G49980	1	+	18510382	18510512	18510383	18510512	18510115	18510236	0.046291	0.728357	0.0,0.0,0.0	0.0,0.105,0.154	-0.086		DNA/RNA polymerases superfamily protein [Source:TAIR;Acc:AT1G49980]
A3SS	AT5G21060	5	-	7152094	7152166	7152094	7152160	7152231	7152382	0.0465329	0.730518	0.363,0.34,0.201	0.473,0.356,0.422	-0.116		Glyceraldehyde-3-phosphate dehydrogenase-like family protein [Source:TAIR;Acc:AT5G21060]
A3SS	AT1G50970	1	+	18896476	18896628	18896479	18896628	18896322	18896367	0.0465344	0.730518	1.0,1.0,1.0	1.0,0.372,1.0	0.209		Vacuolar protein sorting-associated protein 53 B [Source:UniProtKB/Swiss-Prot;Acc:F4I7Y2]
A3SS	AT3G47990	3	-	17713831	17713945	17713831	17713941	17714240	17714360	0.0465994	0.730668	0.246,1.0,1.0	0.0,0.595,1.0	0.217	SIS3	E3 ubiquitin-protein ligase SIS3 [Source:UniProtKB/Swiss-Prot;Acc:Q8GYT9]
A3SS	AT3G54480	3	-	20172550	20172707	20172550	20172680	20173162	20173416	0.0467262	0.732221	0.81,0.773,0.773	0.572,0.516,0.729	0.18	SKIP5	F-box protein SKIP5 [Source:UniProtKB/Swiss-Prot;Acc:Q94FT2]
A3SS	AT2G40630	2	+	16960313	16960543	16960321	16960543	16960157	16960220	0.0469568	0.734798	1.0,1.0,1.0	0.917,0.953,0.97	0.053		Uncharacterised conserved protein (UCP030365) [Source:TAIR;Acc:AT2G40630]
A3SS	AT3G54480	3	-	20172550	20172718	20172550	20172680	20173162	20173416	0.0470091	0.734798	0.878,0.81,0.762	0.598,0.584,0.8	0.156	SKIP5	F-box protein SKIP5 [Source:UniProtKB/Swiss-Prot;Acc:Q94FT2]
A3SS	AT1G58602	1	+	21763877	21764050	21763880	21764050	21761384	21763787	0.0474135	0.738596	0.789,0.828,0.74	0.74,0.877,1.0	-0.087		Probable disease resistance protein At1g58602 [Source:UniProtKB/Swiss-Prot;Acc:Q8W3K0]
A3SS	AT1G15350	1	-	5278944	5279194	5278944	5279189	5279481	5279604	0.0474539	0.738789	0.634,0.542,0.587	0.65,0.639,0.662	-0.063		unknown protein; BEST Arabidopsis thaliana protein match is: unknown protein (TAIR:AT3G15770.2); Has 148 Blast hits to 148 proteins in 25 species: Archae - 0; Bacteria - 0; Metazoa - 0; Fungi - 0; Plants - 141; Viruses - 0; Other Eukaryotes - 7 (sou /.../CBI BLink). [Source:TAIR;Acc:AT1G15350]
A3SS	AT2G36960	2	+	15525311	15525422	15525314	15525422	15524826	15525106	0.0476886	0.740691	0.023,0.228,0.183	0.297,0.342,0.107	-0.104	TKI1	TSL-kinase interacting protein 1 [Source:UniProtKB/Swiss-Prot;Acc:Q8LJT8]
A3SS	AT5G57700	5	+	23375282	23375385	23375289	23375385	23374873	23374983	0.0477428	0.741096	0.29,0.27,0.283	0.468,0.311,0.427	-0.121		BNR/Asp-box repeat family protein [Source:TAIR;Acc:AT5G57700]
A3SS	AT1G03960	1	+	1014620	1014672	1014634	1014672	1013714	1014543	0.0479494	0.743428	0.648,0.94,1.0	1.0,1.0,1.0	-0.137	B''EPSILON	Probable serine/threonine protein phosphatase 2A regulatory subunit B''epsilon [Source:UniProtKB/Swiss-Prot;Acc:Q84JI6]
A3SS	AT1G16560	1	+	5668860	5669039	5668918	5669039	5668572	5668739	0.0480145	0.743562	0.078,0.458,0.064	0.303,0.536,0.266	-0.168		Per1-like family protein [Source:TAIR;Acc:AT1G16560]
A3SS	AT3G07630	3	+	2436806	2436898	2436843	2436898	2436631	2436727	0.0480482	0.743646	0.733,1.0,1.0	0.668,0.657,1.0	0.136	ADT2	Arogenate dehydratase/prephenate dehydratase 2, chloroplastic [Source:UniProtKB/Swiss-Prot;Acc:Q9SSE7]
A3SS	AT4G31000	4	+	15103692	15103933	15103901	15103933	15103158	15103499	0.0481051	0.743652	0.667,1.0,1.0	0.714,1.0,0.8	0.051	CBP60F	Calmodulin-binding protein 60 F [Source:UniProtKB/Swiss-Prot;Acc:F4JR57]
A3SS	AT5G09790	5	-	3039951	3040170	3039951	3040167	3040434	3040515	0.0480836	0.743652	0.418,0.434,0.497	0.725,0.701,0.544	-0.207	ATXR5	Histone-lysine N-methyltransferase ATXR5 [Source:UniProtKB/Swiss-Prot;Acc:Q8VZJ1]
A3SS	AT3G03340	3	+	788952	788993	788955	788993	788781	788840	0.048305	0.746305	0.228,0.238,0.116	0.18,0.039,0.043	0.107	UNE6	LUC7 related protein [Source:TAIR;Acc:AT3G03340]
A3SS	AT5G18830	5	+	6277383	6277613	6277386	6277613	6277062	6277235	0.0483937	0.747237	0.126,0.149,0.052	0.017,0.083,0.04	0.062	SPL7	Squamosa promoter-binding-like protein 7 [Source:UniProtKB/Swiss-Prot;Acc:Q8S9G8]
A3SS	AT1G29960	1	+	10495013	10495251	10495026	10495251	10494706	10494938	0.0486654	0.749236	0.144,0.164,0.15	0.0,0.078,0.125	0.085		Peptidase S24/S26A/S26B/S26C family protein [Source:TAIR;Acc:AT1G29960]
A3SS	AT1G53730	1	+	20065091	20065251	20065100	20065251	20064869	20065002	0.0486415	0.749236	1.0,0.363,1.0	1.0,1.0,1.0	-0.212	SRF6	Protein STRUBBELIG-RECEPTOR FAMILY 6 [Source:UniProtKB/Swiss-Prot;Acc:Q9C8M9]
A3SS	AT1G71710	1	-	26976717	26976831	26976717	26976764	26980862	26981029	0.0489443	0.752875	0.718,0.642,0.439	0.494,0.357,0.448	0.167		DNAse I-like superfamily protein [Source:TAIR;Acc:AT1G71710]
A3SS	AT3G13030	3	-	4171557	4171646	4171557	4171615	4171951	4172051	0.0490483	0.752931	1.0,1.0,1.0	0.946,0.882,1.0	0.057		hAT transposon superfamily protein [Source:TAIR;Acc:AT3G13030]
A3SS	AT5G65970	5	-	26388993	26389082	26388993	26389072	26389157	26389232	0.0491771	0.754469	1.0,0.923,1.0	1.0,0.941,0.809	0.058	MLO10	MLO-like protein 10 [Source:UniProtKB/Swiss-Prot;Acc:Q9FKY5]
A3SS	AT4G01690	4	+	730401	730592	730403	730592	729886	730306	0.0492179	0.754656	1.0,1.0,1.0	1.0,0.284,1.0	0.239	PPOX1	Protoporphyrinogen oxidase 1, chloroplastic [Source:UniProtKB/Swiss-Prot;Acc:P55826]
A3SS	AT1G34630	1	+	12685666	12685816	12685699	12685816	12685199	12685603	0.0494041	0.754881	1.0,1.0,1.0	1.0,0.835,1.0	0.055		BEST Arabidopsis thaliana protein match is: Mitochondrial import inner membrane translocase subunit Tim17/Tim22/Tim23 family protein (TAIR:AT5G51150.1); Has 323 Blast hits to 315 proteins in 124 species: Archae - 0; Bacteria - 0; Metazoa - 95; Fungi /.../; Plants - 73; Viruses - 0; Other Eukaryotes - 45 (source: NCBI BLink). [Source:TAIR;Acc:AT1G34630]
A3SS	AT1G30410	1	+	10741970	10742186	10741977	10742186	10741804	10741879	0.0493345	0.754881	1.0,1.0,0.979	0.885,0.953,0.962	0.06	ATMRP13	multidrug resistance-associated protein 13 [Source:TAIR;Acc:AT1G30410]
A3SS	AT4G27745	4	+	13840292	13840403	13840360	13840403	13840014	13840196	0.0494046	0.754881	0.601,0.408,0.365	0.444,0.659,0.814	-0.181		Protein yippee-like At4g27745 [Source:UniProtKB/Swiss-Prot;Acc:Q9T096]
A3SS	AT4G04620	4	-	2329889	2329974	2329889	2329943	2330059	2330200	0.0494995	0.755115	0.394,0.236,0.302	0.401,0.368,0.454	-0.097	ATG8B	Autophagy-related protein 8b [Source:UniProtKB/Swiss-Prot;Acc:Q9XEB5]
A3SS	AT5G59400	5	+	23958668	23958917	23958673	23958917	23958332	23958419	0.0495186	0.755115	0.086,0.12,0.049	0.215,0.154,0.112	-0.075		FUNCTIONS IN: molecular_function unknown; INVOLVED IN: biological_process unknown; LOCATED IN: chloroplast; EXPRESSED IN: 23 plant structures; EXPRESSED DURING: 13 growth stages; BEST Arabidopsis thaliana protein match is: PGR5-like B (TAIR:AT4G1196 /.../Has 97 Blast hits to 97 proteins in 19 species: Archae - 0; Bacteria - 0; Metazoa - 0; Fungi - 0; Plants - 97; Viruses - 0; Other Eukaryotes - 0…
A3SS	AT5G60170	5	+	24229702	24229836	24229742	24229836	24229463	24229555	0.0499473	0.759649	1.0,1.0,1.0	1.0,0.867,0.905	0.076		RNA binding (RRM/RBD/RNP motifs) family protein [Source:TAIR;Acc:AT5G60170]
AS Type	GeneID	chr	strand	longExonStart_0base	longExonEnd	shortES	shortEE	flankingES	flankingEE	PValue	FDR	IncLevel1	IncLevel2	IncLevelDifference	Name	description
A5SS	AT4G37930	4	-	17832524	17832732	17832666	17832732	17832314	17832426	0	0	0.18,0.121,0.134	0.86,1.0,1.0	-0.808	SHM1	Serine hydroxymethyltransferase 1, mitochondrial [Source:UniProtKB/Swiss-Prot;Acc:Q9SZJ5]
A5SS	AT4G37930	4	-	17832530	17832732	17832666	17832732	17832314	17832426	1.11022e-16	7.87981e-13	0.184,0.149,0.136	0.852,1.0,1.0	-0.794	SHM1	Serine hydroxymethyltransferase 1, mitochondrial [Source:UniProtKB/Swiss-Prot;Acc:Q9SZJ5]
A5SS	AT1G79820	1	-	30025658	30025859	30025710	30025859	30025210	30025310	3.0087e-14	1.42362e-10	0.0,0.0,0.0	1.0,1.0,1.0	-1	SGB1	Probable plastidic glucose transporter 3 [Source:UniProtKB/Swiss-Prot;Acc:Q2V4B9]
A5SS	AT5G36790	5	-	14483040	14483112	14483044	14483112	14482828	14482921	1.93039e-10	3.42524e-07	0.14,0.534,0.611	0.024,0.0,0.0	0.42	PGLP1B	Phosphoglycolate phosphatase 1A, chloroplastic [Source:UniProtKB/Swiss-Prot;Acc:P0DKC3]
A5SS	AT1G07280	1	+	2238261	2238311	2238261	2238307	2238389	2239910	4.34768e-10	6.85726e-07	0.0,0.0,0.0	0.683,0.395,0.746	-0.608		Tetratricopeptide repeat (TPR)-like superfamily protein [Source:TAIR;Acc:AT1G07280]
A5SS	AT5G53180	5	-	21569827	21570072	21569970	21570072	21569515	21569611	9.52825e-10	1.35254e-06	0.0,0.0,0.0	0.585,0.561,0.339	-0.495	ATPTB2	Polypyrimidine tract-binding protein homolog 2 [Source:UniProtKB/Swiss-Prot;Acc:Q9FGL9]
A5SS	AT3G05345	3	-	1523344	1523450	1523369	1523450	1523067	1523147	1.16461e-09	1.50287e-06	1.0,1.0,1.0	0.463,0.463,0.301	0.591		Chaperone DnaJ-domain superfamily protein [Source:TAIR;Acc:AT3G05345]
A5SS	AT2G41100	2	+	17138072	17138306	17138072	17138206	17138673	17138943	7.23785e-09	7.33866e-06	0.211,0.313,0.334	1.0,0.768,0.759	-0.556	CML12	Calmodulin-like protein 12 [Source:UniProtKB/Swiss-Prot;Acc:P25071]
A5SS	AT2G21300	2	-	9118709	9118925	9118879	9118925	9118072	9118298	5.58752e-08	5.28766e-05	0.714,1.0,1.0	0.333,0.167,0.0	0.738		ATP binding microtubule motor family protein [Source:TAIR;Acc:AT2G21300]
A5SS	AT4G35110	4	-	16714134	16714398	16714202	16714398	16713863	16714009	6.22537e-08	5.52307e-05	0.287,0.841,0.385	1.0,1.0,1.0	-0.496		Arabidopsis phospholipase-like protein (PEARLI 4) family [Source:TAIR;Acc:AT4G35110]
A5SS	AT1G67480	1	+	25276293	25276463	25276293	25276345	25276832	25276904	2.21032e-07	0.000184562	0.198,0.249,0.208	0.31,0.446,0.377	-0.159		F-box/kelch-repeat protein At1g67480 [Source:UniProtKB/Swiss-Prot;Acc:Q9CAG8]
A5SS	AT1G59520	1	+	21865248	21865441	21865248	21865367	21865662	21865889	2.71053e-07	0.000213755	0.309,0.402,0.402	1.0,1.0,1.0	-0.629	CW7	CW7 [Source:TAIR;Acc:AT1G59520]
A5SS	AT5G44750	5	+	18056513	18056594	18056513	18056585	18056667	18056754	3.42577e-07	0.000255941	0.322,0.0,0.0	1.0,1.0,0.487	-0.722	REV1	DNA repair protein REV1 [Source:UniProtKB/Swiss-Prot;Acc:A3EWL3]
A5SS	AT3G48200	3	-	17836654	17836795	17836658	17836795	17836410	17836564	3.66483e-07	0.000260112	0.262,0.167,0.15	0.42,0.377,0.362	-0.193		unknown protein; FUNCTIONS IN: molecular_function unknown; INVOLVED IN: biological_process unknown; LOCATED IN: endomembrane system; EXPRESSED IN: 21 plant structures; EXPRESSED DURING: 13 growth stages; Has 210 Blast hits to 148 proteins in 42 spec /.../rchae - 0; Bacteria - 118; Metazoa - 0; Fungi - 0; Plants - 48; Viruses - 0; Other Eukaryotes - 44 (source: NCBI BLink). [Source:TAIR;Acc:AT3G48…
A5SS	AT5G18820	5	+	6273554	6273768	6273554	6273758	6273862	6274327	4.33412e-07	0.000292966	0.059,0.35,0.212	0.0,0.0,0.0	0.207	CPN60A2	Chaperonin 60 subunit alpha 2, chloroplastic [Source:UniProtKB/Swiss-Prot;Acc:Q56XV8]
A5SS	AT2G02148	2	-	549519	549616	549531	549616	549139	549322	4.89837e-07	0.000316056	0.0,0.318,0.0	0.482,0.411,0.532	-0.369		Uncharacterized protein At2g02148 [Source:UniProtKB/Swiss-Prot;Acc:Q56XX3]
A5SS	AT2G24360	2	-	10366659	10366902	10366754	10366902	10365179	10366118	5.67345e-07	0.00035015	0.821,0.801,0.781	0.958,0.927,0.878	-0.12		Protein kinase superfamily protein [Source:TAIR;Acc:AT2G24360]
A5SS	AT3G62750	3	+	23214746	23214927	23214746	23214796	23215039	23215111	7.05493e-07	0.000408449	0.728,0.562,0.151	1.0,1.0,0.842	-0.467	BGLU8	Beta-glucosidase 8 [Source:UniProtKB/Swiss-Prot;Acc:Q67XN2]
A5SS	AT2G41100	2	+	17138072	17138573	17138072	17138206	17139044	17139612	7.19354e-07	0.000408449	1.0,0.437,0.765	1.0,1.0,1.0	-0.266	CML12	Calmodulin-like protein 12 [Source:UniProtKB/Swiss-Prot;Acc:P25071]
A5SS	AT3G04610	3	-	1252840	1253018	1252893	1253018	1252156	1252403	7.73833e-07	0.000422483	1.0,1.0,1.0	0.558,0.901,0.769	0.257	FLK	Flowering locus K homology domain [Source:UniProtKB/Swiss-Prot;Acc:Q9SR13]
A5SS	AT1G13460	1	+	4615812	4616059	4615812	4616049	4616427	4617667	8.77583e-07	0.000446338	0.908,1.0,1.0	0.777,0.825,0.878	0.143	B'THETA	Serine/threonine protein phosphatase 2A 57 kDa regulatory subunit B' theta isoform [Source:UniProtKB/Swiss-Prot;Acc:Q8LF36]
A5SS	AT3G03010	3	-	680343	680605	680494	680605	679933	680142	8.80413e-07	0.000446338	0.049,0.043,0.163	0.007,0.018,0.006	0.075		Peptidyl-tRNA hydrolase II (PTH2) family protein [Source:TAIR;Acc:AT3G03010]
A5SS	AT2G27530	2	-	11764713	11764845	11764767	11764845	11764565	11764604	9.34128e-07	0.000446625	0.143,0.109,0.107	0.057,0.076,0.072	0.051	RPL10AB	60S ribosomal protein L10a-2 [Source:UniProtKB/Swiss-Prot;Acc:P59230]
A5SS	AT5G05270	5	+	1563319	1563543	1563319	1563492	1563643	1563727	9.43907e-07	0.000446625	0.018,0.01,0.013	0.074,0.069,0.116	-0.073	CHI3	Probable chalcone--flavonone isomerase 3 [Source:UniProtKB/Swiss-Prot;Acc:Q8VZW3]
A5SS	AT3G61415	3	-	22723011	22723224	22723161	22723224	22722709	22722984	1.08146e-06	0.000495203	0.043,0.19,0.135	0.013,0.0,0.0	0.118	ASK21	SKP1-like protein 21 [Source:UniProtKB/Swiss-Prot;Acc:Q8LF97]
A5SS	AT2G43760	2	+	18132672	18133081	18132672	18132788	18133188	18134068	1.17175e-06	0.000504029	0.481,0.368,0.469	0.722,0.643,0.643	-0.23	MOCS2	Molybdopterin synthase catalytic subunit [Source:UniProtKB/Swiss-Prot;Acc:O22827]
A5SS	AT5G24750	5	-	8493165	8493244	8493188	8493244	8492875	8492910	1.14244e-06	0.000504029	0.555,0.367,0.466	0.127,0.0,0.0	0.42		UDP-Glycosyltransferase superfamily protein [Source:TAIR;Acc:AT5G24750]
A5SS	AT3G10060	3	+	3103014	3103077	3103014	3103072	3103167	3103242	1.23098e-06	0.000513933	0.084,0.084,0.088	0.208,0.176,0.116	-0.081	FKBP16-4	Peptidyl-prolyl cis-trans isomerase FKBP16-4, chloroplastic [Source:UniProtKB/Swiss-Prot;Acc:Q9SR70]
A5SS	AT4G39710	4	-	18427552	18427619	18427562	18427619	18427413	18427482	1.65123e-06	0.000669692	1.0,1.0,1.0	0.654,0.688,0.842	0.272	PNSL4	Photosynthetic NDH subunit of lumenal location 4, chloroplastic [Source:UniProtKB/Swiss-Prot;Acc:Q9SCY3]
A5SS	AT3G20790	3	+	7270472	7270540	7270472	7270537	7270619	7270697	2.34308e-06	0.000898919	0.597,0.597,0.0	0.747,1.0,1.0	-0.518		NAD(P)-binding Rossmann-fold superfamily protein [Source:TAIR;Acc:AT3G20790]
A5SS	AT4G32060	4	+	15502217	15502446	15502217	15502301	15502511	15502725	2.63687e-06	0.00098501	0.382,0.383,0.353	0.562,0.481,0.467	-0.131		calcium-binding EF hand family protein [Source:TAIR;Acc:AT4G32060]
A5SS	AT2G25740	2	+	10981115	10981228	10981115	10981223	10981333	10981393	2.81916e-06	0.00102497	1.0,1.0,1.0	0.928,0.294,0.889	0.296		ATP-dependent protease La (LON) domain protein [Source:TAIR;Acc:AT2G25740]
A5SS	AT2G23985	2	+	10205461	10205501	10205461	10205474	10205622	10205693	2.88826e-06	0.00102497	0.041,0.046,0.085	0.182,0.136,0.262	-0.136		unknown protein; Has 2 Blast hits to 2 proteins in 1 species: Archae - 0; Bacteria - 0; Metazoa - 0; Fungi - 0; Plants - 2; Viruses - 0; Other Eukaryotes - 0 (source: NCBI BLink). [Source:TAIR;Acc:AT2G23985]
A5SS	AT4G31170	4	-	15155466	15155703	15155567	15155703	15155047	15155118	3.45536e-06	0.00116783	1.0,1.0,0.944	0.672,0.764,0.915	0.198		Protein kinase superfamily protein [Source:TAIR;Acc:AT4G31170]
A5SS	AT5G04360	5	+	1223036	1223247	1223036	1223186	1223475	1223536	3.57343e-06	0.00117965	0.033,0.0,0.163	0.416,0.312,0.277	-0.27	PU1	Pullulanase 1, chloroplastic [Source:UniProtKB/Swiss-Prot;Acc:Q8GTR4]
A5SS	AT1G29240	1	-	10219617	10219846	10219622	10219846	10217967	10219016	4.3377e-06	0.0013994	0.422,0.196,0.13	0.0,0.0,0.0	0.249		Protein of unknown function (DUF688) [Source:TAIR;Acc:AT1G29240]
A5SS	AT3G55920	3	-	20744494	20744728	20744667	20744728	20744223	20744401	4.44424e-06	0.00140191	0.029,0.096,0.115	0.158,0.227,0.154	-0.1	CYP21-2	Peptidyl-prolyl cis-trans isomerase CYP21-2 [Source:UniProtKB/Swiss-Prot;Acc:Q8L8W5]
A5SS	AT5G05980	5	-	1803366	1803610	1803533	1803610	1803125	1803235	4.8145e-06	0.00148569	0.0,0.0,0.0	0.091,1.0,1.0	-0.697	FPGS1	Folylpolyglutamate synthase [Source:UniProtKB/Swiss-Prot;Acc:F4K2A1]
A5SS	AT3G57800	3	-	21409420	21409570	21409525	21409570	21409226	21409295	5.42046e-06	0.00160299	0.0,0.227,1.0	1.0,1.0,0.805	-0.526	BHLH60	Transcription factor bHLH60 [Source:UniProtKB/Swiss-Prot;Acc:Q3EAI1]
A5SS	AT1G51740	1	+	19189900	19190064	19189900	19190061	19190150	19190396	6.61849e-06	0.00184215	0.0,0.0,0.0	0.212,0.099,0.297	-0.203	SYP81	Syntaxin-81 [Source:UniProtKB/Swiss-Prot;Acc:P59277]
A5SS	AT5G59160	5	+	23880008	23880098	23880008	23880078	23880274	23880834	1.05009e-05	0.00276038	0.0,0.307,0.47	1.0,1.0,1.0	-0.741	TOPP2	Serine/threonine-protein phosphatase PP1 isozyme 2 [Source:UniProtKB/Swiss-Prot;Acc:P48482]
A5SS	AT2G23370	2	-	9953674	9953766	9953678	9953766	9953489	9953571	1.17545e-05	0.00303372	0.0,0.0,0.0	0.179,0.029,0.08	-0.096		unknown protein; BEST Arabidopsis thaliana protein match is: unknown protein (TAIR:AT4G34090.1); Has 73 Blast hits to 73 proteins in 21 species: Archae - 0; Bacteria - 0; Metazoa - 0; Fungi - 0; Plants - 65; Viruses - 0; Other Eukaryotes - 8 (source /.../ BLink). [Source:TAIR;Acc:AT2G23370]
A5SS	AT2G43760	2	+	18132672	18133081	18132672	18132693	18133188	18134068	1.21026e-05	0.0030678	0.317,0.2,0.188	0.426,0.346,0.451	-0.173	MOCS2	Molybdopterin synthase catalytic subunit [Source:UniProtKB/Swiss-Prot;Acc:O22827]
A5SS	AT4G03115	4	-	1384883	1385003	1384895	1385003	1384711	1384756	1.29249e-05	0.00312415	0.0,1.0,1.0	0.0,0.0,0.0	0.667		Mitochondrial substrate carrier family protein [Source:TAIR;Acc:AT4G03115]
A5SS	AT3G09470	3	-	2911105	2911328	2911242	2911328	2910372	2910734	1.29852e-05	0.00312415	0.055,0.084,0.099	0.21,0.197,0.167	-0.112		UNC93-like protein 3 [Source:UniProtKB/Swiss-Prot;Acc:Q94AA1]
A5SS	AT5G05000	5	-	1475984	1476040	1476007	1476040	1475670	1475788	1.29453e-05	0.00312415	0.303,0.466,0.604	0.813,1.0,1.0	-0.48	TOC34	Translocase of chloroplast 34, chloroplastic [Source:UniProtKB/Swiss-Prot;Acc:Q38906]
A5SS	AT5G36880	5	-	14540138	14540299	14540236	14540299	14539927	14539980	1.35024e-05	0.00318694	0.142,0.183,0.17	0.289,0.401,0.25	-0.148	ACS	Acetyl-coenzyme A synthetase, chloroplastic/glyoxysomal [Source:UniProtKB/Swiss-Prot;Acc:B9DGD6]
A5SS	AT5G54290	5	+	22052585	22052718	22052585	22052612	22052845	22053007	1.44968e-05	0.00325526	0.804,1.0,1.0	0.854,0.638,0.507	0.268	CCDA	Cytochrome c-type biogenesis ccda-like chloroplastic protein [Source:UniProtKB/Swiss-Prot;Acc:Q9M5P3]
A5SS	AT2G40400	2	+	16872422	16872757	16872422	16872539	16872987	16873258	1.46768e-05	0.00325526	1.0,0.975,1.0	0.992,0.912,0.913	0.053		Protein of unknown function (DUF399 and DUF3411) [Source:TAIR;Acc:AT2G40400]
A5SS	AT1G72560	1	-	27324957	27325115	27324982	27325115	27324388	27324871	1.56854e-05	0.00342544	0.19,0.0,0.0	0.35,0.246,0.215	-0.207	PSD	Exportin-T [Source:UniProtKB/Swiss-Prot;Acc:Q7PC79]
A5SS	AT2G34310	2	-	14478359	14478577	14478557	14478577	14477714	14477985	1.69504e-05	0.00364563	0.084,0.037,0.042	0.075,0.179,0.121	-0.071		unknown protein; FUNCTIONS IN: molecular_function unknown; INVOLVED IN: biological_process unknown; LOCATED IN: cellular_component unknown; EXPRESSED IN: 24 plant structures; EXPRESSED DURING: 13 growth stages; BEST Arabidopsis thaliana protein matc /.../unknown protein (TAIR:AT1G29530.1); Has 1236 Blast hits to 680 proteins in 89 species: Archae - 0; Bacteria - 0; Metazoa - 473; Fungi - 0; Plant…
A5SS	AT5G08760	5	+	2854939	2855048	2854939	2855043	2855219	2855282	1.77996e-05	0.00377113	0.037,0.027,0.037	0.137,0.092,0.06	-0.063		unknown protein; FUNCTIONS IN: molecular_function unknown; INVOLVED IN: biological_process unknown; LOCATED IN: endomembrane system; Has 3 Blast hits to 3 proteins in 2 species: Archae - 0; Bacteria - 0; Metazoa - 0; Fungi - 0; Plants - 3; Viruses - /.../her Eukaryotes - 0 (source: NCBI BLink). [Source:TAIR;Acc:AT5G08760]
A5SS	AT1G45230	1	-	17170265	17170455	17170357	17170455	17169536	17170050	1.92014e-05	0.00400829	0.861,0.383,0.685	1.0,0.861,1.0	-0.311		Protein of unknown function (DUF3223) [Source:TAIR;Acc:AT1G45230]
A5SS	AT5G58200	5	+	23551027	23551172	23551027	23551089	23551244	23551351	1.97403e-05	0.00406106	1.0,0.0,0.0	1.0,1.0,0.0	-0.333		Calcineurin-like metallo-phosphoesterase superfamily protein [Source:TAIR;Acc:AT5G58200]
A5SS	AT5G20520	5	-	6945377	6945432	6945397	6945432	6945168	6945285	2.08538e-05	0.00422886	0.99,1.0,0.968	0.983,0.91,0.893	0.057	WAV2	alpha/beta-Hydrolases superfamily protein [Source:TAIR;Acc:AT5G20520]
A5SS	AT4G13575	4	-	7893265	7893476	7893402	7893476	7893068	7893189	2.11782e-05	0.00423415	0.343,0.0,0.0	1.0,1.0,0.148	-0.602		unknown protein; FUNCTIONS IN: molecular_function unknown; INVOLVED IN: biological_process unknown; LOCATED IN: cellular_component unknown; Has 30201 Blast hits to 17322 proteins in 780 species: Archae - 12; Bacteria - 1396; Metazoa - 17338; Fungi - /.../ Plants - 5037; Viruses - 0; Other Eukaryotes - 2996 (source: NCBI BLink). [Source:TAIR;Acc:AT4G13575]
A5SS	AT5G05980	5	-	1803445	1803610	1803533	1803610	1803125	1803235	2.29079e-05	0.00451636	0.0,0.387,0.0	0.112,1.0,1.0	-0.575	FPGS1	Folylpolyglutamate synthase [Source:UniProtKB/Swiss-Prot;Acc:F4K2A1]
A5SS	AT2G43010	2	+	17887904	17887996	17887904	17887985	17888113	17888179	2.42853e-05	0.0045964	0.107,0.127,0.103	0.218,0.183,0.194	-0.086	PIF4	Transcription factor PIF4 [Source:UniProtKB/Swiss-Prot;Acc:Q8W2F3]
A5SS	AT4G25434	4	-	13004325	13004439	13004330	13004439	13003975	13004243	2.38785e-05	0.0045964	0.41,1.0,0.0	0.0,0.0,0.0	0.47	NUDT10	Nudix hydrolase 10 [Source:UniProtKB/Swiss-Prot;Acc:Q6NPD7]
A5SS	AT2G01120	2	+	86511	86655	86511	86601	86747	86839	2.95065e-05	0.00551112	0.0,0.0,0.0	0.05,0.066,0.269	-0.128	ORC4	origin recognition complex subunit 4 [Source:TAIR;Acc:AT2G01120]
A5SS	AT3G13800	3	+	4540057	4540130	4540057	4540113	4540245	4540322	3.09281e-05	0.00570161	0.058,0.045,0.118	0.246,0.235,0.148	-0.136		Metallo-hydrolase/oxidoreductase superfamily protein [Source:TAIR;Acc:AT3G13800]
A5SS	AT5G47720	5	+	19333919	19334027	19333919	19334005	19334111	19334427	3.31557e-05	0.00602696	0.348,0.378,0.269	0.558,0.526,0.586	-0.225		Probable acetyl-CoA acetyltransferase, cytosolic 2 [Source:UniProtKB/Swiss-Prot;Acc:Q9FIK7]
A5SS	AT1G49950	1	-	18496921	18497239	18497083	18497239	18496563	18496750	3.52013e-05	0.00624602	0.027,0.095,0.0	0.2,0.128,0.053	-0.086	TRB1	Telomere repeat-binding factor 1 [Source:UniProtKB/Swiss-Prot;Acc:Q8VWK4]
A5SS	AT5G52070	5	+	21163578	21163648	21163578	21163603	21163726	21163951	3.82978e-05	0.00653095	0.507,0.921,0.861	1.0,1.0,1.0	-0.237		Agenet domain-containing protein [Source:TAIR;Acc:AT5G52070]
A5SS	AT1G07940	1	-	2464997	2465076	2465024	2465076	2464330	2464814	3.85878e-05	0.00653095	1.0,1.0,1.0	0.824,0.872,0.773	0.177	A3	Elongation factor 1-alpha 2 [Source:UniProtKB/Swiss-Prot;Acc:Q8W4H7]
A5SS	AT2G36720	2	+	15394862	15395026	15394862	15395022	15395174	15395253	3.86474e-05	0.00653095	0.052,0.018,0.042	0.106,0.173,0.157	-0.108		Acyl-CoA N-acyltransferase with RING/FYVE/PHD-type zinc finger domain [Source:TAIR;Acc:AT2G36720]
A5SS	AT5G24090	5	-	8144478	8144678	8144481	8144678	8143698	8144210	3.83862e-05	0.00653095	0.0,0.027,0.0	0.143,0.028,0.062	-0.069	CHIB1	Acidic endochitinase [Source:UniProtKB/Swiss-Prot;Acc:P19172]
A5SS	AT1G45230	1	-	17170336	17170455	17170357	17170455	17169536	17170050	4.06826e-05	0.00674669	0.888,0.469,0.755	1.0,0.876,1.0	-0.255		Protein of unknown function (DUF3223) [Source:TAIR;Acc:AT1G45230]
A5SS	AT5G54440	5	+	22106311	22106498	22106311	22106486	22106910	22107212	4.08746e-05	0.00674669	0.839,0.913,0.918	0.976,0.963,0.964	-0.078	TRS130	Trafficking protein particle complex II-specific subunit 130 homolog [Source:UniProtKB/Swiss-Prot;Acc:F4K0C4]
A5SS	AT1G54180	1	+	20228799	20228939	20228799	20228877	20229030	20229163	4.47557e-05	0.00730238	0.85,1.0,1.0	0.713,0.516,0.0	0.54	BRXL3	Protein Brevis radix-like 3 [Source:UniProtKB/Swiss-Prot;Acc:Q5HZ09]
A5SS	AT5G56030	5	+	22686801	22687132	22686801	22687031	22687350	22687492	4.83663e-05	0.00771416	1.0,0.633,1.0	1.0,1.0,1.0	-0.122	HSP90-2	Heat shock protein 90-2 [Source:UniProtKB/Swiss-Prot;Acc:P55737]
A5SS	AT1G07940	1	-	2464922	2465076	2465024	2465076	2464330	2464814	5.39008e-05	0.00850135	1.0,1.0,1.0	0.795,0.827,0.848	0.177	A3	Elongation factor 1-alpha 2 [Source:UniProtKB/Swiss-Prot;Acc:Q8W4H7]
A5SS	AT1G09230	1	-	2980850	2981012	2980854	2981012	2980604	2980778	5.64689e-05	0.00871278	1.0,0.884,1.0	0.761,0.815,0.901	0.136	SNRNP65	U11/U12 small nuclear ribonucleoprotein 65 kDa protein [Source:UniProtKB/Swiss-Prot;Acc:Q8RWV8]
A5SS	AT1G14205	1	+	4855532	4855688	4855532	4855681	4855776	4855868	6.14674e-05	0.00899516	0.022,0.0,0.0	0.099,0.212,0.034	-0.108		Ribosomal L18p/L5e family protein [Source:TAIR;Acc:AT1G14205]
A5SS	AT1G05940	1	-	1802346	1802528	1802395	1802528	1802023	1802260	6.11881e-05	0.00899516	1.0,0.73,0.735	1.0,0.911,1.0	-0.149	CAT9	Cationic amino acid transporter 9, chloroplastic [Source:UniProtKB/Swiss-Prot;Acc:Q9C5D6]
A5SS	AT1G53160	1	+	19806854	19807301	19806854	19807023	19807342	19807608	8.94923e-05	0.0124543	1.0,0.333,0.429	1.0,1.0,1.0	-0.413	SPL4	Squamosa promoter-binding-like protein 4 [Source:UniProtKB/Swiss-Prot;Acc:Q9S7A9]
A5SS	AT4G01880	4	-	811749	811812	811754	811812	811580	811667	9.07115e-05	0.0125015	0.054,0.0,0.0	0.04,0.144,0.163	-0.098		methyltransferases [Source:TAIR;Acc:AT4G01880]
A5SS	AT5G41130	5	-	16461224	16461325	16461229	16461325	16460994	16461125	9.1625e-05	0.0125059	0.0,0.0,0.0	0.115,0.229,0.0	-0.115		Esterase/lipase/thioesterase family protein [Source:TAIR;Acc:AT5G41130]
A5SS	AT1G68820	1	+	25866794	25866882	25866794	25866864	25866961	25867031	9.62445e-05	0.0128886	0.146,0.189,0.204	0.036,0.047,0.06	0.132		Transmembrane Fragile-X-F-associated protein [Source:TAIR;Acc:AT1G68820]
A5SS	AT5G20510	5	-	6942485	6942546	6942513	6942546	6941716	6941945	0.000101832	0.0135095	0.0,0.04,0.0	0.115,0.092,0.098	-0.088	AL5	PHD finger protein ALFIN-LIKE 5 [Source:UniProtKB/Swiss-Prot;Acc:Q5XEM9]
A5SS	AT1G20830	1	+	7243753	7243926	7243753	7243922	7244094	7244482	0.000105688	0.0138911	0.985,0.911,0.951	0.9,0.774,0.862	0.104	MCD1	multiple chloroplast division site 1 [Source:TAIR;Acc:AT1G20830]
A5SS	AT5G54590	5	+	22182037	22182241	22182037	22182218	22182335	22182826	0.000107281	0.0139711	1.0,1.0,1.0	0.869,1.0,0.951	0.06	CRLK1	Protein kinase superfamily protein [Source:TAIR;Acc:AT5G54590]
A5SS	AT5G28646	5	+	10675182	10675353	10675182	10675341	10675432	10675570	0.000110134	0.0142123	1.0,1.0,0.788	0.538,0.736,1.0	0.171	WVD2	Protein WAVE-DAMPENED 2 [Source:UniProtKB/Swiss-Prot;Acc:Q84ZT9]
A5SS	AT3G11620	3	-	3670269	3670417	3670273	3670417	3669784	3670110	0.000118236	0.0151203	1.0,0.98,0.971	0.927,0.89,0.919	0.072		alpha/beta-Hydrolases superfamily protein [Source:TAIR;Acc:AT3G11620]
A5SS	AT1G59520	1	+	21862123	21862198	21862123	21862185	21862574	21862681	0.000121256	0.0153681	0.966,0.887,0.968	1.0,1.0,0.989	-0.056	CW7	CW7 [Source:TAIR;Acc:AT1G59520]
A5SS	AT1G08600	1	+	2723823	2723957	2723823	2723938	2724074	2724133	0.000126393	0.0158774	0.02,0.084,0.097	0.214,0.174,0.216	-0.134	ATRX	Protein CHROMATIN REMODELING 20 [Source:UniProtKB/Swiss-Prot;Acc:F4HW51]
A5SS	AT5G43100	5	+	17300920	17301028	17300920	17301017	17301126	17301196	0.00013233	0.0164774	0.0,0.032,0.021	0.065,0.1,0.045	-0.052		Eukaryotic aspartyl protease family protein [Source:TAIR;Acc:AT5G43100]
A5SS	AT1G53160	1	+	19806854	19807087	19806854	19807023	19807342	19807608	0.000135464	0.0165769	1.0,0.26,0.513	1.0,1.0,1.0	-0.409	SPL4	Squamosa promoter-binding-like protein 4 [Source:UniProtKB/Swiss-Prot;Acc:Q9S7A9]
A5SS	AT5G49500	5	-	20079773	20079878	20079778	20079878	20079530	20079685	0.000139218	0.0167475	0.0,0.0,0.163	0.196,0.358,0.594	-0.328	SRP-54B	Signal recognition particle 54 kDa protein 2 [Source:UniProtKB/Swiss-Prot;Acc:P49966]
A5SS	AT5G53550	5	+	21755290	21755558	21755290	21755474	21755823	21755903	0.000151724	0.0180985	0.771,0.75,0.797	0.879,0.947,0.847	-0.118	YSL3	Metal-nicotianamine transporter YSL3 [Source:UniProtKB/Swiss-Prot;Acc:Q2EF88]
A5SS	AT3G17920	3	+	6140962	6141044	6140962	6141036	6141112	6141238	0.000153788	0.0181315	0.868,0.965,0.927	1.0,0.983,1.0	-0.074		Outer arm dynein light chain 1 protein [Source:TAIR;Acc:AT3G17920]
A5SS	AT3G21740	3	-	7663789	7664010	7663892	7664010	7663372	7663651	0.000154555	0.0181315	0.0,0.0,0.02	0.0,0.03,0.184	-0.065	APO4	APO protein 4, mitochondrial [Source:UniProtKB/Swiss-Prot;Acc:Q9LSZ0]
A5SS	AT4G24440	4	+	12633179	12633328	12633179	12633289	12633440	12633538	0.000192668	0.022031	0.885,0.898,0.898	0.911,0.986,0.979	-0.065	TFIIA-S	Transcription initiation factor IIA subunit 2 [Source:UniProtKB/Swiss-Prot;Acc:Q39236]
A5SS	AT1G26440	1	-	9145295	9145340	9145300	9145340	9144994	9145195	0.000195556	0.022031	0.41,0.0,0.422	0.0,0.0,0.098	0.245	UPS5	Ureide permease 5 [Source:UniProtKB/Swiss-Prot;Acc:Q93Z75]
A5SS	AT1G28090	1	+	9797407	9797502	9797407	9797471	9797590	9797678	0.00019472	0.022031	1.0,0.217,0.769	0.454,0.0,0.0	0.511		Polynucleotide adenylyltransferase family protein [Source:TAIR;Acc:AT1G28090]
A5SS	AT3G17330	3	-	5919943	5920188	5919970	5920188	5919388	5919517	0.000203029	0.0226929	1.0,1.0,0.983	0.932,0.935,0.941	0.058	ECT6	evolutionarily conserved C-terminal region 6 [Source:TAIR;Acc:AT3G17330]
A5SS	AT4G38930	4	+	18149533	18149771	18149533	18149587	18149871	18149909	0.000206376	0.0228867	0.069,0.08,0.073	0.183,0.138,0.204	-0.101		Ubiquitin fusion degradation UFD1 family protein [Source:TAIR;Acc:AT4G38930]
A5SS	AT4G31170	4	-	15155471	15155703	15155567	15155703	15155047	15155118	0.000218725	0.0238831	1.0,1.0,0.771	0.694,0.826,0.875	0.125		Protein kinase superfamily protein [Source:TAIR;Acc:AT4G31170]
A5SS	AT4G23650	4	-	12325535	12325700	12325545	12325700	12325336	12325464	0.000217912	0.0238831	1.0,0.674,1.0	1.0,1.0,1.0	-0.109	CPK3	Calcium-dependent protein kinase 3 [Source:UniProtKB/Swiss-Prot;Acc:Q42479]
A5SS	AT1G16560	1	+	5668572	5668709	5668572	5668671	5668918	5669039	0.000238644	0.0255123	0.783,0.805,1.0	1.0,1.0,1.0	-0.137		Per1-like family protein [Source:TAIR;Acc:AT1G16560]
A5SS	AT2G40400	2	+	16872422	16872543	16872422	16872539	16872987	16873258	0.000236152	0.0255123	1.0,0.847,1.0	0.94,0.547,0.574	0.262		Protein of unknown function (DUF399 and DUF3411) [Source:TAIR;Acc:AT2G40400]
A5SS	AT1G79880	1	-	30047457	30047610	30047461	30047610	30047278	30047344	0.000239037	0.0255123	0.0,0.089,0.0	0.0,0.127,0.234	-0.091	LA2	La protein 2 [Source:UniProtKB/Swiss-Prot;Acc:Q0V7U7]
A5SS	AT5G27630	5	+	9779718	9779904	9779718	9779844	9780007	9780154	0.000241609	0.0255943	1.0,0.741,1.0	0.656,0.264,1.0	0.274	ACBP5	Acyl-CoA-binding domain-containing protein 5 [Source:UniProtKB/Swiss-Prot;Acc:Q8RWD9]
A5SS	AT5G50320	5	-	20483415	20483610	20483437	20483610	20482959	20483134	0.000246774	0.0259479	0.0,0.0,0.0	0.136,0.035,0.0	-0.057	HAG3	Elongator complex protein 3 [Source:UniProtKB/Swiss-Prot;Acc:Q93ZR1]
A5SS	AT5G09230	5	+	2871647	2871695	2871647	2871691	2871818	2872056	0.000263265	0.0274783	0.159,0.171,0.107	0.0,0.05,0.048	0.113	SRT2	NAD-dependent protein deacetylase SRT2 [Source:UniProtKB/Swiss-Prot;Acc:Q94AQ6]
A5SS	AT1G10090	1	-	3293269	3293455	3293298	3293455	3292598	3292897	0.00027587	0.0283766	0.93,0.921,0.984	0.816,0.888,0.83	0.1		CSC1-like protein At1g10090 [Source:UniProtKB/Swiss-Prot;Acc:Q94A87]
A5SS	AT1G33410	1	-	12111797	12111892	12111823	12111892	12111594	12111709	0.0002855	0.0289476	0.021,0.016,0.017	0.082,0.062,0.075	-0.055	SAR1	SUPPRESSOR OF AUXIN RESISTANCE1 [Source:TAIR;Acc:AT1G33410]
A5SS	AT2G14285	2	-	6053330	6053527	6053363	6053527	6053097	6053135	0.000291536	0.0293501	1.0,1.0,1.0	0.0,0.452,1.0	0.516		Small nuclear ribonucleoprotein family protein [Source:TAIR;Acc:AT2G14285]
A5SS	AT3G05345	3	-	1523369	1523450	1523378	1523450	1523266	1523304	0.000300443	0.0300337	1.0,0.972,1.0	0.921,0.914,0.956	0.06		Chaperone DnaJ-domain superfamily protein [Source:TAIR;Acc:AT3G05345]
A5SS	AT1G14820	1	-	5106162	5106954	5106721	5106954	5105887	5105924	0.000306859	0.0300652	0.974,1.0,1.0	0.908,0.846,0.96	0.087		Sec14p-like phosphatidylinositol transfer family protein [Source:TAIR;Acc:AT1G14820]
A5SS	AT1G53490	1	+	19966478	19966719	19966478	19966710	19966804	19966952	0.000307112	0.0300652	0.0,0.0,0.16	0.16,0.1,0.293	-0.131	HEI10	E3 ubiquitin-protein ligase CCNB1IP1 homolog [Source:UniProtKB/Swiss-Prot;Acc:F4HRI2]
A5SS	AT4G31170	4	-	15155544	15155703	15155567	15155703	15155047	15155118	0.000324222	0.0313084	1.0,1.0,0.466	0.0,0.258,0.723	0.495		Protein kinase superfamily protein [Source:TAIR;Acc:AT4G31170]
A5SS	AT1G70610	1	+	26622658	26622797	26622658	26622786	26622940	26622983	0.000328793	0.0315352	0.053,0.068,0.026	0.105,0.178,0.117	-0.084	ABCB26	ABC transporter B family member 26, chloroplastic [Source:UniProtKB/Swiss-Prot;Acc:Q8RY46]
A5SS	AT2G36360	2	-	15243286	15243517	15243415	15243517	15242903	15243208	0.000333679	0.0317233	0.026,0.055,0.07	0.114,0.184,0.07	-0.072		Galactose oxidase/kelch repeat superfamily protein [Source:TAIR;Acc:AT2G36360]
A5SS	AT5G47710	5	+	19330006	19330097	19330006	19330079	19330461	19330580	0.000335223	0.0317233	1.0,1.0,1.0	0.813,0.924,1.0	0.088		Calcium-dependent lipid-binding (CaLB domain) family protein [Source:TAIR;Acc:AT5G47710]
A5SS	AT1G13450	1	-	4613640	4613889	4613754	4613889	4613285	4613516	0.000348082	0.0326307	0.083,0.088,0.114	0.184,0.207,0.144	-0.083	GT-1	Trihelix transcription factor GT-1 [Source:UniProtKB/Swiss-Prot;Acc:Q9FX53]
A5SS	AT5G03770	5	+	996778	996881	996778	996876	996976	997070	0.000363937	0.0334814	0.0,0.061,0.0	0.245,0.109,0.163	-0.152	KDTA	Probable 3-deoxy-D-manno-octulosonic acid transferase, mitochondrial [Source:UniProtKB/Swiss-Prot;Acc:Q8VZA5]
A5SS	AT1G01760	1	-	276607	276789	276705	276789	276404	276519	0.000365595	0.0334814	0.326,0.476,0.331	0.063,0.195,0.075	0.267		adenosine deaminases;RNA binding;RNA binding;adenosine deaminases [Source:TAIR;Acc:AT1G01760]
A5SS	AT3G63340	3	-	23395903	23395983	23395910	23395983	23395567	23395709	0.000417026	0.0371584	0.911,0.885,0.931	0.965,1.0,0.984	-0.074		Protein phosphatase 2C family protein [Source:TAIR;Acc:AT3G63340]
A5SS	AT1G63855	1	-	23700173	23700331	23700280	23700331	23699834	23700108	0.000420417	0.0371584	0.139,0.193,0.149	0.0,0.077,0.048	0.119		Putative methyltransferase family protein [Source:TAIR;Acc:AT1G63855]
A5SS	AT5G13950	5	-	4499170	4499254	4499176	4499254	4498768	4498918	0.00041224	0.0371584	0.974,0.925,0.886	0.971,1.0,0.989	-0.058		unknown protein; BEST Arabidopsis thaliana protein match is: unknown protein (TAIR:AT1G02290.1); Has 147 Blast hits to 145 proteins in 44 species: Archae - 0; Bacteria - 2; Metazoa - 56; Fungi - 6; Plants - 81; Viruses - 0; Other Eukaryotes - 2 (sou /.../CBI BLink). [Source:TAIR;Acc:AT5G13950]
A5SS	AT5G42400	5	-	16956069	16956270	16956090	16956270	16955576	16955986	0.000417195	0.0371584	0.306,0.335,0.138	0.0,0.128,0.0	0.217	ATXR7	Histone-lysine N-methyltransferase ATXR7 [Source:UniProtKB/Swiss-Prot;Acc:F4K1J4]
A5SS	AT1G59520	1	+	21865248	21865441	21865248	21865371	21865662	21865889	0.000421452	0.0371584	0.023,0.014,0.038	0.112,0.138,0.067	-0.081	CW7	CW7 [Source:TAIR;Acc:AT1G59520]
A5SS	AT5G20040	5	-	6770479	6770553	6770499	6770553	6770351	6770394	0.000424362	0.037184	0.0,0.052,0.023	0.09,0.12,0.049	-0.061	IPT9	tRNA dimethylallyltransferase 9 [Source:UniProtKB/Swiss-Prot;Acc:Q9C5J6]
A5SS	AT1G66260	1	-	24697007	24697150	24697115	24697150	24696766	24696916	0.000432185	0.0374472	0.899,0.807,0.846	0.894,0.984,0.938	-0.088	ALY3	THO complex subunit 4C [Source:UniProtKB/Swiss-Prot;Acc:Q94EH8]
A5SS	AT4G34370	4	+	16435112	16435395	16435112	16435347	16435467	16435948	0.000432641	0.0374472	0.945,1.0,1.0	0.943,0.876,0.948	0.059	ARI1	Probable E3 ubiquitin-protein ligase ARI1 [Source:UniProtKB/Swiss-Prot;Acc:Q949V6]
A5SS	AT3G57470	3	-	21275499	21275667	21275591	21275667	21275337	21275405	0.000447524	0.0377184	0.745,0.619,0.568	0.826,0.79,0.843	-0.176		Insulinase (Peptidase family M16) family protein [Source:TAIR;Acc:AT3G57470]
A5SS	AT1G13450	1	-	4613612	4613655	4613640	4613655	4613285	4613516	0.000443325	0.0377184	0.938,1.0,1.0	0.86,0.693,1.0	0.128	GT-1	Trihelix transcription factor GT-1 [Source:UniProtKB/Swiss-Prot;Acc:Q9FX53]
A5SS	AT5G18830	5	+	6277713	6277786	6277713	6277761	6277863	6277971	0.000448456	0.0377184	0.0,0.113,0.027	0.096,0.128,0.145	-0.076	SPL7	Squamosa promoter-binding-like protein 7 [Source:UniProtKB/Swiss-Prot;Acc:Q8S9G8]
A5SS	AT5G18525	5	-	6149154	6149288	6149167	6149288	6148964	6149076	0.00044704	0.0377184	1.0,1.0,1.0	0.968,0.914,0.876	0.081		protein serine/threonine kinases;protein tyrosine kinases;ATP binding;protein kinases [Source:TAIR;Acc:AT5G18525]
A5SS	AT5G59430	5	+	23967312	23967577	23967312	23967487	23968147	23968337	0.00044906	0.0377184	1.0,1.0,1.0	0.978,0.926,0.925	0.057	TRP1	Telomere repeat-binding protein 1 [Source:UniProtKB/Swiss-Prot;Acc:Q8L7L8]
A5SS	AT1G09090	1	+	2933557	2933611	2933557	2933606	2933695	2933809	0.000455152	0.0380052	0.039,0.208,0.089	0.0,0.0,0.054	0.094	RBOHB	Respiratory burst oxidase homolog protein B [Source:UniProtKB/Swiss-Prot;Acc:Q9SBI0]
A5SS	AT1G01860	1	-	305525	305702	305546	305702	305346	305442	0.000457849	0.0380069	0.0,0.064,0.534	0.0,0.031,0.0	0.189	PFC1	Ribosomal RNA adenine dimethylase family protein [Source:TAIR;Acc:AT1G01860]
A5SS	AT3G09260	3	-	2842569	2842809	2842737	2842809	2842341	2842429	0.000487264	0.0402135	1.0,0.5,0.429	0.714,1.0,1.0	-0.262	BGLU23	Beta-glucosidase 23 [Source:UniProtKB/Swiss-Prot;Acc:Q9SR37]
A5SS	AT3G13000	3	-	4160154	4160365	4160215	4160365	4159936	4160085	0.000507983	0.0409706	0.222,0.0,0.0	0.416,0.348,0.588	-0.377		Protein of unknown function, DUF547 [Source:TAIR;Acc:AT3G13000]
A5SS	AT3G15520	3	-	5250574	5250642	5250579	5250642	5250298	5250457	0.000520553	0.0412807	0.06,0.072,0.078	0.195,0.104,0.099	-0.063	CYP37	Peptidyl-prolyl cis-trans isomerase CYP37, chloroplastic [Source:UniProtKB/Swiss-Prot;Acc:P82869]
A5SS	AT2G21590	2	+	9238746	9238784	9238746	9238761	9239353	9239583	0.000519832	0.0412807	0.0,0.367,1.0	0.0,0.0,0.0	0.456	APL4	Probable glucose-1-phosphate adenylyltransferase large subunit, chloroplastic [Source:UniProtKB/Swiss-Prot;Acc:Q9SIK1]
A5SS	AT5G16980	5	-	5580658	5580929	5580777	5580929	5580292	5580469	0.000530177	0.0418103	0.0,0.169,0.1	0.467,0.193,0.527	-0.306		Zinc-binding dehydrogenase family protein [Source:TAIR;Acc:AT5G16980]
A5SS	AT5G41480	5	+	16597109	16597276	16597109	16597271	16597365	16597560	0.00053639	0.0420666	0.223,0.15,0.143	0.297,0.385,0.441	-0.202	EMB9	Folylpolyglutamate synthetase family protein [Source:TAIR;Acc:AT5G41480]
A5SS	AT3G55020	3	-	20391741	20391839	20391746	20391839	20391468	20391586	0.000539437	0.0420731	0.039,0.077,0.112	0.148,0.123,0.182	-0.075		Ypt/Rab-GAP domain of gyp1p superfamily protein [Source:TAIR;Acc:AT3G55020]
A5SS	AT5G51170	5	-	20794984	20795077	20795039	20795077	20794554	20794801	0.000554564	0.0430166	1.0,0.948,0.914	0.605,0.936,0.88	0.147		unknown protein; CONTAINS InterPro DOMAIN/s: Uncharacterised protein family UPF0406 (InterPro:IPR019146); Has 30201 Blast hits to 17322 proteins in 780 species: Archae - 12; Bacteria - 1396; Metazoa - 17338; Fungi - 3422; Plants - 5037; Viruses - 0; /.../ Eukaryotes - 2996 (source: NCBI BLink). [Source:TAIR;Acc:AT5G51170]
A5SS	AT1G60270	1	-	22223397	22223634	22223566	22223634	22223039	22223292	0.000559272	0.043146	0.077,1.0,0.333	1.0,1.0,0.0	-0.197	BGLU6	Putative beta-glucosidase 6 [Source:UniProtKB/Swiss-Prot;Acc:Q682B4]
A5SS	AT1G07590	1	-	2339195	2339391	2339269	2339391	2338127	2338985	0.00058055	0.044069	0.927,0.858,1.0	0.794,0.678,0.834	0.16		Pentatricopeptide repeat-containing protein At1g07590, mitochondrial [Source:UniProtKB/Swiss-Prot;Acc:Q940Q2]
A5SS	AT2G19490	2	+	8442774	8442956	8442774	8442947	8443047	8443194	0.000577545	0.044069	0.0,0.16,0.322	0.147,0.0,0.0	0.112		DNA repair protein recA homolog 3, mitochondrial [Source:UniProtKB/Swiss-Prot;Acc:Q9ZUP2]
A5SS	AT4G10100	4	+	6308682	6308816	6308682	6308810	6309084	6309546	0.00057798	0.044069	0.94,0.884,0.882	0.987,0.989,0.925	-0.065	CNX7	Molybdopterin synthase sulfur carrier subunit [Source:UniProtKB/Swiss-Prot;Acc:Q9S7A3]
A5SS	AT1G66260	1	-	24697009	24697150	24697115	24697150	24696766	24696916	0.000588911	0.0442657	0.898,0.839,0.843	0.899,0.985,0.936	-0.08	ALY3	THO complex subunit 4C [Source:UniProtKB/Swiss-Prot;Acc:Q94EH8]
A5SS	AT1G79820	1	-	30025658	30025859	30025726	30025859	30025210	30025310	0.000589378	0.0442657	0.071,0.0,0.0	0.187,0.106,0.027	-0.083	SGB1	Probable plastidic glucose transporter 3 [Source:UniProtKB/Swiss-Prot;Acc:Q2V4B9]
A5SS	AT1G47560	1	+	17467549	17467649	17467549	17467630	17467831	17467899	0.000624052	0.0464131	0.817,1.0,1.0	0.641,0.641,0.543	0.331	SEC3B	Exocyst complex component SEC3B [Source:UniProtKB/Swiss-Prot;Acc:Q9SX86]
A5SS	AT1G59750	1	+	21979288	21979619	21979288	21979423	21980383	21980438	0.000633901	0.0466229	0.755,0.798,0.82	1.0,0.781,0.949	-0.119	ARF1	Auxin response factor 1 [Source:UniProtKB/Swiss-Prot;Acc:Q8L7G0]
A5SS	AT5G07630	5	+	2412403	2412555	2412403	2412512	2412639	2412758	0.000632245	0.0466229	1.0,1.0,0.968	0.845,0.961,1.0	0.054		lipid transporters [Source:TAIR;Acc:AT5G07630]
A5SS	AT5G38140	5	-	15222217	15222272	15222235	15222272	15221914	15222103	0.000637904	0.0466755	0.908,0.593,0.562	0.264,0.288,0.435	0.359	NFYC10	Nuclear transcription factor Y subunit C-10 [Source:UniProtKB/Swiss-Prot;Acc:Q58CM8]
A5SS	AT2G16640	2	-	7215306	7215553	7215479	7215553	7211393	7215126	0.000655162	0.0476924	0.159,0.079,0.079	0.045,0.053,0.022	0.066	TOC132	Translocase of chloroplast 132, chloroplastic [Source:UniProtKB/Swiss-Prot;Acc:Q9SLF3]
A5SS	AT5G45780	5	-	18568768	18568840	18568781	18568840	18568609	18568669	0.000675329	0.0481723	0.917,0.822,1.0	0.943,0.316,0.712	0.256		Probable LRR receptor-like serine/threonine-protein kinase At5g45780 [Source:UniProtKB/Swiss-Prot;Acc:C0LGU5]
A5SS	AT3G05940	3	-	1780009	1780254	1780010	1780254	1779734	1779850	0.000674452	0.0481723	0.0,0.0,0.44	0.0,0.0,0.0	0.147		Protein of unknown function (DUF300) [Source:TAIR;Acc:AT3G05940]
A5SS	AT5G07630	5	+	2413118	2413215	2413118	2413193	2413337	2413409	0.000674099	0.0481723	0.0,0.068,0.0	0.288,0.127,0.093	-0.147		lipid transporters [Source:TAIR;Acc:AT5G07630]
A5SS	AT2G17033	2	+	7401137	7401235	7401137	7401232	7401632	7402054	0.000672034	0.0481723	0.74,0.4,0.573	0.34,0.202,0.307	0.288		Pentatricopeptide repeat-containing protein At2g17033 [Source:UniProtKB/Swiss-Prot;Acc:Q8GWA9]
A5SS	AT5G62950	5	-	25263370	25263901	25263710	25263901	25263025	25263154	0.000691215	0.049059	0.136,0.186,0.16	0.298,0.255,0.252	-0.108		RNA polymerase II, Rpb4, core protein [Source:TAIR;Acc:AT5G62950]
A5SS	AT1G03070	1	+	729900	730056	729900	730023	730139	730415	0.000706875	0.0499208	0.0,1.0,1.0	0.354,0.767,0.0	0.293		Bax inhibitor-1 family protein [Source:TAIR;Acc:AT1G03070]
A5SS	AT1G72560	1	-	27324957	27325115	27324991	27325115	27324388	27324871	0.000716433	0.0503454	0.38,0.0,0.12	0.43,0.551,0.256	-0.246	PSD	Exportin-T [Source:UniProtKB/Swiss-Prot;Acc:Q7PC79]
A5SS	AT5G49990	5	-	20341746	20341881	20341766	20341881	20341090	20341197	0.000733117	0.051264	0.0,0.0,0.097	0.233,0.106,0.056	-0.099	NAT5	Nucleobase-ascorbate transporter 5 [Source:UniProtKB/Swiss-Prot;Acc:Q8RWE9]
A5SS	AT1G67420	1	+	25257366	25257521	25257366	25257506	25257602	25257768	0.000737513	0.0513186	0.0,0.0,0.0	0.0,0.155,0.88	-0.345		Zn-dependent exopeptidases superfamily protein [Source:TAIR;Acc:AT1G67420]
A5SS	AT2G47630	2	+	19534808	19534911	19534808	19534889	19534992	19535025	0.000750586	0.051934	1.0,0.929,0.937	0.882,0.763,0.882	0.113		alpha/beta-Hydrolases superfamily protein [Source:TAIR;Acc:AT2G47630]
A5SS	AT4G24480	4	+	12651996	12652225	12651996	12652112	12652487	12652696	0.000760991	0.051934	0.037,0.028,0.038	0.093,0.11,0.094	-0.065		Protein kinase superfamily protein [Source:TAIR;Acc:AT4G24480]
A5SS	AT5G03830	5	+	1019382	1019607	1019382	1019592	1019687	1019878	0.000813375	0.0552433	0.0,0.0,0.146	0.186,0.121,0.139	-0.1		CDK inhibitor P21 binding protein [Source:TAIR;Acc:AT5G03830]
A5SS	AT5G40580	5	-	16250559	16250756	16250623	16250756	16250307	16250467	0.000821969	0.0555612	0.0,0.0,0.0	0.231,0.0,0.738	-0.323	PBB2	Proteasome subunit beta type-7-B [Source:UniProtKB/Swiss-Prot;Acc:Q7DLS1]
A5SS	AT5G58160	5	+	23537180	23537277	23537180	23537252	23537375	23537474	0.000855672	0.0562026	0.0,0.056,0.021	0.038,0.133,0.074	-0.056		actin binding [Source:TAIR;Acc:AT5G58160]
A5SS	AT3G57470	3	-	21275500	21275667	21275591	21275667	21275337	21275405	0.000859174	0.0562026	0.555,0.429,0.31	0.718,0.626,0.682	-0.244		Insulinase (Peptidase family M16) family protein [Source:TAIR;Acc:AT3G57470]
A5SS	AT1G11720	1	+	3951552	3951683	3951552	3951662	3952344	3953618	0.00085083	0.0562026	0.789,0.799,0.888	0.888,1.0,1.0	-0.137	SS3	Starch synthase 3, chloroplastic/amyloplastic [Source:UniProtKB/Swiss-Prot;Acc:F4IAG2]
A5SS	AT1G34570	1	-	12656212	12656295	12656235	12656295	12655912	12656034	0.000851986	0.0562026	0.049,0.0,0.019	0.092,0.06,0.101	-0.062		Essential protein Yae1, N-terminal [Source:TAIR;Acc:AT1G34570]
A5SS	AT1G79700	1	-	29992867	29993093	29993006	29993093	29992637	29992726	0.000855732	0.0562026	1.0,1.0,1.0	0.796,1.0,0.438	0.255		AP2-like ethylene-responsive transcription factor At1g79700 [Source:UniProtKB/Swiss-Prot;Acc:A0JPZ8]
A5SS	AT3G47120	3	-	17352596	17352822	17352621	17352822	17352402	17352512	0.000857253	0.0562026	0.804,0.95,1.0	1.0,0.969,1.0	-0.072		Zinc finger CCCH domain-containing protein 42 [Source:UniProtKB/Swiss-Prot;Acc:Q9SD61]
A5SS	AT3G27000	3	-	9954749	9954850	9954771	9954850	9954600	9954650	0.000835986	0.0562026	0.305,0.077,0.481	0.579,0.687,0.616	-0.34	ARP2	Actin-related protein 2 [Source:UniProtKB/Swiss-Prot;Acc:Q9LSD6]
A5SS	AT5G36890	5	-	14542025	14542359	14542177	14542359	14541349	14541531	0.000877934	0.0566831	0.879,0.871,1.0	0.667,0.8,0.688	0.198	BGLU42	Beta-glucosidase 42 [Source:UniProtKB/Swiss-Prot;Acc:Q9FIW4]
A5SS	AT5G51290	5	-	20847341	20847509	20847365	20847509	20847160	20847253	0.000883385	0.0567405	0.965,0.933,0.908	1.0,1.0,0.966	-0.053	CERK	Ceramide kinase [Source:UniProtKB/Swiss-Prot;Acc:Q6USK2]
A5SS	AT4G24230	4	-	12567208	12567362	12567237	12567362	12566630	12567144	0.000887482	0.0567469	0.91,1.0,1.0	0.835,0.835,0.808	0.144	ACBP3	Acyl-CoA-binding domain-containing protein 3 [Source:UniProtKB/Swiss-Prot;Acc:Q9STX1]
A5SS	AT3G04580	3	-	1236204	1238493	1238299	1238493	1235282	1236115	0.000918641	0.0584758	1.0,0.985,1.0	0.981,0.821,1.0	0.061	EIN4	Protein EIN4 [Source:UniProtKB/Swiss-Prot;Acc:Q9ZTP3]
A5SS	AT3G06450	3	-	1979510	1979588	1979560	1979588	1979193	1979334	0.001013	0.0636266	1.0,0.0,0.429	1.0,1.0,1.0	-0.524	BOR3	Probable boron transporter 3 [Source:UniProtKB/Swiss-Prot;Acc:Q93Z13]
A5SS	AT2G34300	2	-	14477080	14477265	14477222	14477265	14475899	14476846	0.00100861	0.0636266	0.0,0.507,0.093	0.643,0.473,0.643	-0.386		Probable methyltransferase PMT25 [Source:UniProtKB/Swiss-Prot;Acc:Q0WT31]
A5SS	AT1G76730	1	-	28804137	28804228	28804154	28804228	28803707	28803934	0.00101868	0.0637012	0.901,0.894,0.909	0.714,0.887,0.799	0.101	COG0212	5-formyltetrahydrofolate cyclo-ligase-like protein COG0212 [Source:UniProtKB/Swiss-Prot;Acc:Q9SRE0]
A5SS	AT2G47630	2	+	19534808	19534904	19534808	19534889	19534992	19535025	0.0010246	0.0637906	1.0,0.936,0.928	0.897,0.753,0.886	0.109		alpha/beta-Hydrolases superfamily protein [Source:TAIR;Acc:AT2G47630]
A5SS	AT5G15540	5	-	5056536	5056646	5056550	5056646	5055961	5056217	0.00104295	0.0643683	1.0,1.0,1.0	0.0,0.763,0.315	0.641	EMB2773	PHD finger family protein [Source:TAIR;Acc:AT5G15540]
A5SS	AT4G26510	4	+	13384061	13384164	13384061	13384106	13384489	13384659	0.00105767	0.0649941	0.062,0.026,0.0	0.162,0.059,0.095	-0.076	UKL4	Uridine kinase-like protein 4 [Source:UniProtKB/Swiss-Prot;Acc:O65583]
A5SS	AT1G05830	1	+	1758902	1759022	1758902	1758992	1759114	1759310	0.00110725	0.0668825	0.056,0.14,0.0	0.0,0.0,0.0	0.065	ATX2	Histone-lysine N-methyltransferase ATX2 [Source:UniProtKB/Swiss-Prot;Acc:P0CB22]
A5SS	AT1G03160	1	+	762509	762628	762509	762578	763012	763210	0.00111471	0.0670478	0.058,0.09,0.087	0.096,0.201,0.198	-0.087	FZL	FZO-like [Source:TAIR;Acc:AT1G03160]
A5SS	AT4G30720	4	-	14974076	14974202	14974084	14974202	14973750	14973963	0.00112586	0.0673167	0.89,1.0,0.858	1.0,0.949,1.0	-0.067		FAD/NAD(P)-binding oxidoreductase family protein [Source:TAIR;Acc:AT4G30720]
A5SS	AT1G69310	1	-	26054664	26054928	26054774	26054928	26054307	26054522	0.00112866	0.0673167	1.0,0.752,0.755	0.545,0.654,0.57	0.246	WRKY57	Probable WRKY transcription factor 57 [Source:UniProtKB/Swiss-Prot;Acc:Q9C983]
A5SS	AT5G18620	5	-	6196326	6196431	6196335	6196431	6195916	6196207	0.00116192	0.06901	0.102,0.199,0.257	0.277,0.449,0.432	-0.2	CHR17	chromatin remodeling factor17 [Source:TAIR;Acc:AT5G18620]
A5SS	AT5G48000	5	-	19447090	19447280	19447201	19447280	19446761	19447004	0.00119091	0.0697776	1.0,1.0,0.697	1.0,1.0,1.0	-0.101	CYP708A2	Cytochrome P450 708A2 [Source:UniProtKB/Swiss-Prot;Acc:Q8L7D5]
A5SS	AT1G60270	1	-	22223395	22223634	22223566	22223634	22223039	22223292	0.00119049	0.0697776	0.556,1.0,0.913	1.0,1.0,0.909	-0.147	BGLU6	Putative beta-glucosidase 6 [Source:UniProtKB/Swiss-Prot;Acc:Q682B4]
A5SS	AT1G67180	1	+	25129730	25129976	25129730	25129816	25130096	25130221	0.0011945	0.0697776	0.0,0.091,0.0	0.538,0.167,0.0	-0.205		zinc finger (C3HC4-type RING finger) family protein / BRCT domain-containing protein [Source:TAIR;Acc:AT1G67180]
A5SS	AT5G63320	5	-	25377095	25377379	25377220	25377379	25376751	25376822	0.0011806	0.0697776	0.034,0.05,0.0	0.097,0.055,0.102	-0.057	GTE10	Transcription factor GTE10 [Source:UniProtKB/Swiss-Prot;Acc:Q9FGW9]
A5SS	AT3G55890	3	+	20741625	20741713	20741625	20741681	20741807	20742002	0.00120863	0.0703138	0.0,0.0,0.042	0.074,0.126,0.089	-0.082		Protein yippee-like At3g55890 [Source:UniProtKB/Swiss-Prot;Acc:Q9LY56]
A5SS	AT1G26440	1	-	9145285	9145340	9145300	9145340	9144994	9145114	0.00121384	0.0703282	1.0,0.696,1.0	0.646,0.604,0.709	0.246	UPS5	Ureide permease 5 [Source:UniProtKB/Swiss-Prot;Acc:Q93Z75]
A5SS	AT1G17960	1	-	6183194	6183495	6183340	6183495	6182821	6182916	0.00123165	0.07107	1.0,0.336,1.0	0.603,0.848,0.603	0.094		Probable threonine--tRNA ligase, cytoplasmic [Source:UniProtKB/Swiss-Prot;Acc:Q8GZ45]
A5SS	AT5G53430	5	+	21679677	21679785	21679677	21679770	21679906	21680042	0.00124034	0.0712821	0.033,0.0,0.0	0.234,0.0,0.089	-0.097	ATX5	Histone-lysine N-methyltransferase ATX5 [Source:UniProtKB/Swiss-Prot;Acc:Q8GZ42]
A5SS	AT1G35250	1	-	12933443	12933553	12933445	12933553	12933263	12933359	0.00125809	0.071721	1.0,0.548,0.845	0.958,0.988,0.974	-0.176		Thioesterase superfamily protein [Source:TAIR;Acc:AT1G35250]
A5SS	AT1G07940	1	-	2464912	2465076	2465024	2465076	2464330	2464814	0.00129435	0.0731008	1.0,1.0,1.0	0.908,0.929,0.936	0.076	A3	Elongation factor 1-alpha 2 [Source:UniProtKB/Swiss-Prot;Acc:Q8W4H7]
A5SS	AT2G05755	2	+	2172403	2172458	2172403	2172450	2172572	2172711	0.00130289	0.0731008	0.13,0.323,0.154	0.07,0.038,0.098	0.134		Nodulin MtN21 /EamA-like transporter family protein [Source:TAIR;Acc:AT2G05755]
A5SS	AT3G57470	3	-	21275501	21275667	21275591	21275667	21275337	21275405	0.00133575	0.0746493	0.57,0.43,0.322	0.71,0.638,0.676	-0.234		Insulinase (Peptidase family M16) family protein [Source:TAIR;Acc:AT3G57470]
A5SS	AT4G10100	4	+	6308682	6308849	6308682	6308816	6309084	6309546	0.00136858	0.0758868	0.393,0.455,0.421	0.289,0.233,0.36	0.129	CNX7	Molybdopterin synthase sulfur carrier subunit [Source:UniProtKB/Swiss-Prot;Acc:Q9S7A3]
A5SS	AT1G26230	1	-	9074677	9074815	9074685	9074815	9074493	9074589	0.00138752	0.0766377	0.656,0.827,0.87	0.928,1.0,0.857	-0.144	CPN60B4	Chaperonin 60 subunit beta 4, chloroplastic [Source:UniProtKB/Swiss-Prot;Acc:Q9C667]
A5SS	AT3G06620	3	-	2065237	2065305	2065281	2065305	2065070	2065139	0.00139487	0.0767452	1.0,0.437,0.845	0.0,0.0,1.0	0.427		PAS domain-containing protein tyrosine kinase family protein [Source:TAIR;Acc:AT3G06620]
A5SS	AT3G14960	3	-	5037286	5037439	5037305	5037439	5037102	5037185	0.00143126	0.0781411	1.0,0.959,0.981	0.983,0.84,0.913	0.068	B3GALT13	Probable beta-1,3-galactosyltransferase 13 [Source:UniProtKB/Swiss-Prot;Acc:Q9LKA9]
A5SS	AT1G49350	1	+	18266171	18266245	18266171	18266241	18266331	18266878	0.0014587	0.0787309	0.929,0.723,0.863	0.562,0.746,0.578	0.21		pfkB-like carbohydrate kinase family protein [Source:TAIR;Acc:AT1G49350]
A5SS	AT3G14075	3	-	4666822	4667079	4666848	4667079	4666041	4666351	0.00145756	0.0787309	1.0,0.942,1.0	0.863,1.0,0.899	0.06		Mono-/di-acylglycerol lipase, N-terminal;Lipase, class 3 [Source:TAIR;Acc:AT3G14075]
A5SS	AT2G14285	2	-	6053243	6053404	6053363	6053404	6053097	6053135	0.00148428	0.0798084	1.0,1.0,1.0	0.471,0.87,1.0	0.22		Small nuclear ribonucleoprotein family protein [Source:TAIR;Acc:AT2G14285]
A5SS	AT5G55700	5	+	22552528	22552797	22552528	22552775	22553019	22553240	0.0015034	0.080531	0.045,0.043,0.062	0.088,0.114,0.165	-0.072	BAM4	Inactive beta-amylase 4, chloroplastic [Source:UniProtKB/Swiss-Prot;Acc:Q9FM68]
A5SS	AT4G35300	4	-	16799246	16799300	16799263	16799300	16798992	16799167	0.00153089	0.0807841	1.0,0.311,0.376	0.844,1.0,1.0	-0.386	MSSP2	Monosaccharide-sensing protein 2 [Source:UniProtKB/Swiss-Prot;Acc:Q8LPQ8]
A5SS	AT5G20990	5	-	7132240	7132348	7132244	7132348	7132056	7132158	0.00153009	0.0807841	0.0,0.058,0.0	0.197,0.134,0.123	-0.132	CNX1	Molybdopterin biosynthesis protein CNX1 [Source:UniProtKB/Swiss-Prot;Acc:Q39054]
A5SS	AT4G10100	4	+	6308682	6308832	6308682	6308810	6309084	6309546	0.00155431	0.0817162	0.932,0.899,0.885	0.988,0.982,0.928	-0.061	CNX7	Molybdopterin synthase sulfur carrier subunit [Source:UniProtKB/Swiss-Prot;Acc:Q9S7A3]
A5SS	AT4G08540	4	+	5433644	5433835	5433644	5433817	5433910	5433998	0.0016752	0.087747	1.0,0.655,1.0	0.974,1.0,1.0	-0.106		DNA-directed RNA polymerase II protein [Source:TAIR;Acc:AT4G08540]
A5SS	AT1G12970	1	+	4424744	4424911	4424744	4424907	4424995	4425789	0.00168722	0.0880518	1.0,1.0,1.0	0.917,0.909,0.97	0.068	PIRL3	Plant intracellular Ras-group-related LRR protein 3 [Source:UniProtKB/Swiss-Prot;Acc:Q8W4Q3]
A5SS	AT5G15410	5	-	5006486	5006613	5006611	5006613	5005686	5006356	0.00171661	0.0889316	0.621,0.686,1.0	0.621,0.406,1.0	0.093	CNGC2	Cyclic nucleotide-gated ion channel 2 [Source:UniProtKB/Swiss-Prot;Acc:O65718]
A5SS	AT2G19390	2	-	8393021	8393128	8393030	8393128	8392876	8392936	0.0017401	0.089821	0.1,0.0,0.18	0.0,0.0,0.0	0.093		unknown protein; BEST Arabidopsis thaliana protein match is: unknown protein (TAIR:AT4G29790.1); Has 203 Blast hits to 188 proteins in 60 species: Archae - 0; Bacteria - 11; Metazoa - 24; Fungi - 34; Plants - 93; Viruses - 0; Other Eukaryotes - 41 ( /.../: NCBI BLink). [Source:TAIR;Acc:AT2G19390]
A5SS	AT4G35300	4	-	16799263	16799511	16799424	16799511	16798992	16799167	0.00174918	0.0899625	0.125,0.28,0.4	0.143,0.074,0.02	0.189	MSSP2	Monosaccharide-sensing protein 2 [Source:UniProtKB/Swiss-Prot;Acc:Q8LPQ8]
A5SS	AT2G14285	2	-	6053239	6053404	6053363	6053404	6053097	6053135	0.00177501	0.090634	1.0,1.0,1.0	0.354,0.868,1.0	0.259		Small nuclear ribonucleoprotein family protein [Source:TAIR;Acc:AT2G14285]
A5SS	AT5G47455	5	+	19251077	19251251	19251077	19251196	19251657	19251704	0.00180302	0.0914069	0.045,0.029,0.0	0.124,0.138,0.039	-0.076		unknown protein; BEST Arabidopsis thaliana protein match is: unknown protein (TAIR:AT4G17310.2); Has 132 Blast hits to 132 proteins in 13 species: Archae - 0; Bacteria - 0; Metazoa - 0; Fungi - 0; Plants - 132; Viruses - 0; Other Eukaryotes - 0 (sou /.../CBI BLink). [Source:TAIR;Acc:AT5G47455]
A5SS	AT4G34450	4	+	16476227	16476466	16476227	16476462	16476600	16477021	0.00181473	0.091673	1.0,1.0,1.0	0.495,1.0,1.0	0.168		Coatomer subunit gamma [Source:UniProtKB/Swiss-Prot;Acc:Q0WW26]
A5SS	AT5G09790	5	-	3039940	3040089	3039951	3040089	3039744	3039845	0.00182179	0.0917032	1.0,1.0,1.0	0.701,1.0,1.0	0.1	ATXR5	Histone-lysine N-methyltransferase ATXR5 [Source:UniProtKB/Swiss-Prot;Acc:Q8VZJ1]
A5SS	AT3G48540	3	-	17991617	17991693	17991621	17991693	17991180	17991220	0.00187407	0.0936705	0.774,0.551,1.0	1.0,1.0,1.0	-0.225		Cytidine/deoxycytidylate deaminase family protein [Source:TAIR;Acc:AT3G48540]
A5SS	AT5G28050	5	-	10045376	10045484	10045469	10045484	10045047	10045104	0.00188425	0.0938489	0.923,0.837,0.875	0.975,1.0,0.881	-0.074		Cytidine/deoxycytidylate deaminase family protein [Source:TAIR;Acc:AT5G28050]
A5SS	AT3G46450	3	-	17094708	17094902	17094718	17094902	17094457	17094553	0.00201614	0.0997181	0.0,0.0,1.0	1.0,1.0,1.0	-0.667		SEC14 cytosolic factor family protein / phosphoglyceride transfer family protein [Source:TAIR;Acc:AT3G46450]
A5SS	AT4G28790	4	+	14219331	14219406	14219331	14219369	14219502	14219568	0.00206442	0.101751	0.139,0.124,0.103	0.617,0.446,0.446	-0.381	BHLH23	Transcription factor bHLH23 [Source:UniProtKB/Swiss-Prot;Acc:Q9SVU6]
A5SS	AT4G35810	4	+	16969793	16969923	16969793	16969917	16970010	16970198	0.0020739	0.101865	0.744,1.0,1.0	1.0,0.367,0.813	0.188		2-oxoglutarate (2OG) and Fe(II)-dependent oxygenase superfamily protein [Source:TAIR;Acc:AT4G35810]
A5SS	AT1G70250	1	+	26454781	26454814	26454781	26454797	26454910	26456088	0.00208364	0.101991	0.633,1.0,0.707	1.0,0.76,0.948	-0.123		receptor serine/threonine kinase, putative [Source:TAIR;Acc:AT1G70250]
A5SS	AT5G27970	5	+	10013257	10013441	10013257	10013429	10013504	10013679	0.00210759	0.102097	0.598,1.0,0.911	1.0,1.0,1.0	-0.164		ARM repeat superfamily protein [Source:TAIR;Acc:AT5G27970]
A5SS	AT3G17300	3	+	5907233	5907316	5907233	5907315	5907572	5907663	0.0021015	0.102097	0.903,0.889,0.954	0.861,0.829,0.8	0.085		unknown protein; Has 48 Blast hits to 48 proteins in 21 species: Archae - 0; Bacteria - 0; Metazoa - 0; Fungi - 0; Plants - 40; Viruses - 0; Other Eukaryotes - 8 (source: NCBI BLink). [Source:TAIR;Acc:AT3G17300]
A5SS	AT5G57150	5	+	23153083	23154274	23153083	23153254	23154538	23154696	0.00211459	0.102097	0.444,0.357,0.7	1.0,1.0,0.6	-0.366	BHLH35	basic helix-loop-helix (bHLH) DNA-binding superfamily protein [Source:TAIR;Acc:AT5G57150]
A5SS	AT2G30910	2	+	13155519	13155601	13155519	13155597	13155736	13155825	0.00210443	0.102097	1.0,0.941,1.0	0.866,0.915,0.949	0.07	ARPC1A	Actin-related protein 2/3 complex subunit 1A [Source:UniProtKB/Swiss-Prot;Acc:O80856]
A5SS	AT2G40400	2	+	16872422	16872757	16872422	16872592	16872987	16873258	0.00212345	0.102178	0.672,0.728,0.761	0.629,0.565,0.595	0.124		Protein of unknown function (DUF399 and DUF3411) [Source:TAIR;Acc:AT2G40400]
A5SS	AT5G43570	5	+	17506400	17506502	17506400	17506472	17507163	17507600	0.00214338	0.102788	0.77,0.0,0.358	0.295,0.0,0.0	0.278		Serine protease inhibitor, potato inhibitor I-type family protein [Source:TAIR;Acc:AT5G43570]
A5SS	AT1G10290	1	+	3375695	3375886	3375695	3375827	3376174	3376288	0.00215332	0.102917	0.852,0.866,0.824	1.0,1.0,1.0	-0.153	DRP2A	Dynamin-2A [Source:UniProtKB/Swiss-Prot;Acc:Q9SE83]
A5SS	AT5G23430	5	-	7899395	7899524	7899415	7899524	7899170	7899288	0.00217543	0.103625	0.734,0.912,0.924	0.953,0.984,0.944	-0.104		Katanin p80 WD40 repeat-containing subunit B1 homolog [Source:UniProtKB/Swiss-Prot;Acc:Q8H0T9]
A5SS	AT5G46740	5	-	18967802	18967923	18967822	18967923	18967606	18967717	0.0022186	0.104977	0.869,1.0,1.0	0.707,1.0,0.934	0.076	UBP21	Ubiquitin carboxyl-terminal hydrolase 21 [Source:UniProtKB/Swiss-Prot;Acc:Q9FIQ1]
A5SS	AT4G17520	4	+	9772648	9772811	9772648	9772806	9772930	9772981	0.00223504	0.105054	1.0,0.0,0.0	1.0,1.0,1.0	-0.667		Hyaluronan / mRNA binding family [Source:TAIR;Acc:AT4G17520]
A5SS	AT5G22640	5	+	7531650	7531896	7531650	7531717	7531987	7532091	0.00227858	0.106747	0.064,0.126,0.068	0.092,0.167,0.155	-0.052	TIC100	Protein TIC 100 [Source:UniProtKB/Swiss-Prot;Acc:Q8LPR8]
A5SS	AT1G16560	1	+	5668572	5668739	5668572	5668671	5668918	5669039	0.00229487	0.106806	0.921,0.81,1.0	1.0,1.0,1.0	-0.09		Per1-like family protein [Source:TAIR;Acc:AT1G16560]
A5SS	AT2G05590	2	+	2068558	2068651	2068558	2068646	2068737	2068822	0.00229466	0.106806	0.117,0.08,0.053	0.01,0.018,0.048	0.058		TLD-domain containing nucleolar protein [Source:TAIR;Acc:AT2G05590]
A5SS	AT4G35300	4	-	16799613	16799777	16799673	16799777	16798992	16799167	0.00236105	0.10917	0.866,1.0,1.0	0.802,1.0,0.805	0.086	MSSP2	Monosaccharide-sensing protein 2 [Source:UniProtKB/Swiss-Prot;Acc:Q8LPQ8]
A5SS	AT5G08130	5	-	2608298	2608370	2608304	2608370	2608058	2608195	0.00235606	0.10917	1.0,1.0,1.0	1.0,0.708,0.926	0.122	BIM1	Transcription factor BIM1 [Source:UniProtKB/Swiss-Prot;Acc:Q9LEZ3]
A5SS	AT3G02070	3	+	362744	362848	362744	362826	362945	363002	0.00251567	0.115566	0.127,0.0,0.226	0.18,1.0,1.0	-0.609		Cysteine proteinases superfamily protein [Source:TAIR;Acc:AT3G02070]
A5SS	AT3G23430	3	-	8389731	8389795	8389743	8389795	8389509	8389630	0.00259046	0.118618	1.0,0.903,0.554	1.0,1.0,1.0	-0.181	PHO1	Phosphate transporter PHO1 [Source:UniProtKB/Swiss-Prot;Acc:Q8S403]
A5SS	AT5G37380	5	-	14819062	14819296	14819191	14819296	14816758	14818457	0.00260749	0.119014	0.298,0.301,0.574	0.708,0.604,0.751	-0.297		Chaperone DnaJ-domain superfamily protein [Source:TAIR;Acc:AT5G37380]
A5SS	AT5G18820	5	+	6271953	6272091	6271953	6272075	6272195	6272403	0.00262141	0.119266	0.0,0.076,0.0	0.0,0.148,0.123	-0.065	CPN60A2	Chaperonin 60 subunit alpha 2, chloroplastic [Source:UniProtKB/Swiss-Prot;Acc:Q56XV8]
A5SS	AT1G29030	1	-	10131069	10131128	10131109	10131128	10130905	10130971	0.00263913	0.119313	0.934,0.673,0.965	1.0,1.0,1.0	-0.143		Apoptosis inhibitory protein 5 (API5) [Source:TAIR;Acc:AT1G29030]
A5SS	AT1G14230	1	+	4862342	4862458	4862342	4862438	4862587	4862695	0.00267123	0.120375	0.934,0.415,1.0	1.0,1.0,0.78	-0.144	APY4	Probable apyrase 4 [Source:UniProtKB/Swiss-Prot;Acc:Q8H1D8]
A5SS	AT1G52360	1	+	19505193	19505440	19505193	19505403	19505698	19506170	0.00271288	0.121865	0.976,0.876,0.973	0.819,0.86,0.825	0.107		Coatomer subunit beta'-2 [Source:UniProtKB/Swiss-Prot;Acc:Q9C827]
A5SS	AT2G48100	2	+	19670500	19670828	19670500	19670690	19671175	19671285	0.00274053	0.122719	0.209,0.228,0.247	0.348,0.308,0.317	-0.096		Exonuclease family protein [Source:TAIR;Acc:AT2G48100]
A5SS	AT4G04740	4	-	2404399	2404468	2404441	2404468	2404217	2404242	0.00284486	0.12699	0.598,1.0,1.0	0.611,0.541,0.746	0.233	CPK23	Calcium-dependent protein kinase 23 [Source:UniProtKB/Swiss-Prot;Acc:Q9M101]
A5SS	AT1G30810	1	-	10941679	10941825	10941766	10941825	10941469	10941580	0.00286658	0.12716	0.0,0.0,0.031	0.231,0.0,0.0	-0.067	JMJ18	Lysine-specific demethylase JMJ18 [Source:UniProtKB/Swiss-Prot;Acc:F4I6G4]
A5SS	AT4G28710	4	+	14175332	14175445	14175332	14175434	14175718	14175776	0.00288493	0.127575	0.14,0.055,0.121	0.034,0.013,0.083	0.062	XI-H	Myosin-14 [Source:UniProtKB/Swiss-Prot;Acc:F4JM19]
A5SS	AT5G26610	5	+	9375182	9375283	9375182	9375230	9375437	9375527	0.00292578	0.128979	0.0,0.033,0.0	0.036,0.041,0.151	-0.065		D111/G-patch domain-containing protein [Source:TAIR;Acc:AT5G26610]
A5SS	AT3G06290	3	-	1902188	1902303	1902215	1902303	1901231	1902112	0.00296875	0.129666	0.0,0.0,0.0	0.119,0.0,0.063	-0.061		SAC3/GANP/Nin1/mts3/eIF-3 p25 family [Source:TAIR;Acc:AT3G06290]
A5SS	AT5G28050	5	-	10045411	10045484	10045469	10045484	10045047	10045104	0.00296581	0.129666	0.835,0.771,0.758	0.951,1.0,0.799	-0.129		Cytidine/deoxycytidylate deaminase family protein [Source:TAIR;Acc:AT5G28050]
A5SS	AT4G28830	4	+	14232633	14232793	14232633	14232690	14232909	14233003	0.00298497	0.12995	0.543,1.0,0.543	1.0,0.372,0.129	0.195		S-adenosyl-L-methionine-dependent methyltransferases superfamily protein [Source:TAIR;Acc:AT4G28830]
A5SS	AT4G10000	4	-	6260468	6260808	6260675	6260808	6260309	6260452	0.00301518	0.130489	0.087,0.217,0.241	0.07,0.0,0.161	0.105		Thioredoxin family protein [Source:TAIR;Acc:AT4G10000]
A5SS	AT3G63520	3	+	23453930	23454042	23453930	23454034	23454208	23454319	0.00307742	0.132393	1.0,0.489,0.489	0.323,0.0,0.489	0.389	CCD1	Carotenoid 9,10(9',10')-cleavage dioxygenase 1 [Source:UniProtKB/Swiss-Prot;Acc:O65572]
A5SS	AT5G08440	5	+	2723480	2723622	2723480	2723609	2723750	2723844	0.00307782	0.132393	0.0,0.033,0.096	0.031,0.14,0.258	-0.1		unknown protein; FUNCTIONS IN: molecular_function unknown; INVOLVED IN: biological_process unknown; LOCATED IN: plasma membrane; EXPRESSED IN: 21 plant structures; EXPRESSED DURING: 13 growth stages; BEST Arabidopsis thaliana protein match is: unkno /.../tein (TAIR:AT5G23490.1); Has 141 Blast hits to 139 proteins in 35 species: Archae - 0; Bacteria - 9; Metazoa - 21; Fungi - 6; Plants - 94; Virus…
A5SS	AT3G56850	3	-	21046988	21047070	21046998	21047070	21046340	21046634	0.0031873	0.136268	0.0,0.0,0.0	0.063,0.019,0.072	-0.051	DPBF3	ABSCISIC ACID-INSENSITIVE 5-like protein 2 [Source:UniProtKB/Swiss-Prot;Acc:Q9LES3]
A5SS	AT5G48000	5	-	19447090	19447280	19447189	19447280	19446761	19447008	0.00331904	0.138905	0.877,0.95,0.855	0.941,0.956,0.994	-0.07	CYP708A2	Cytochrome P450 708A2 [Source:UniProtKB/Swiss-Prot;Acc:Q8L7D5]
A5SS	AT5G58800	5	-	23746801	23746937	23746869	23746937	23746340	23746700	0.00333038	0.138905	0.104,0.115,0.098	0.147,0.164,0.167	-0.054		Probable NAD(P)H dehydrogenase (quinone) FQR1-like 3 [Source:UniProtKB/Swiss-Prot;Acc:Q9LUX9]
A5SS	AT1G10417	1	-	3426542	3426721	3426546	3426721	3426379	3426436	0.00333229	0.138905	0.662,0.0,0.197	0.0,0.0,0.14	0.24		Encodes protein with unknown function whose expression is repressed by inoculation with Agrobacterium tumerifaciens. [Source:TAIR;Acc:AT1G10417]
A5SS	AT1G16300	1	+	5575164	5575203	5575164	5575190	5575335	5575436	0.00332181	0.138905	0.98,0.916,0.886	1.0,0.974,0.974	-0.055	GAPCP2	Glyceraldehyde-3-phosphate dehydrogenase GAPCP2, chloroplastic [Source:UniProtKB/Swiss-Prot;Acc:Q5E924]
A5SS	AT5G55510	5	-	22487267	22487332	22487281	22487332	22487076	22487149	0.00335433	0.139224	1.0,0.988,1.0	0.98,0.749,1.0	0.086	TIM22-3	Mitochondrial import inner membrane translocase subunit TIM22-3 [Source:UniProtKB/Swiss-Prot;Acc:Q6NKU9]
A5SS	AT3G15354	3	-	5170171	5170336	5170189	5170336	5169759	5170071	0.00342457	0.14144	0.536,0.463,0.377	0.658,0.61,0.56	-0.151	SPA3	SPA1-related 3 [Source:TAIR;Acc:AT3G15354]
A5SS	AT4G12610	4	+	7457372	7457714	7457372	7457461	7457996	7458318	0.00342764	0.14144	0.942,0.974,0.882	1.0,0.952,1.0	-0.051	RAP74	transcription activators;DNA binding;RNA polymerase II transcription factors;catalytics;transcription initiation factors [Source:TAIR;Acc:AT4G12610]
A5SS	AT4G28710	4	+	14175332	14175521	14175332	14175434	14175718	14175776	0.00347508	0.142569	0.099,0.129,0.101	0.045,0.035,0.079	0.057	XI-H	Myosin-14 [Source:UniProtKB/Swiss-Prot;Acc:F4JM19]
A5SS	AT1G06630	1	+	2027738	2027962	2027738	2027816	2028052	2028976	0.00356373	0.145784	0.055,0.145,0.102	0.221,0.256,0.138	-0.104		F-box/LRR-repeat protein At1g06630 [Source:UniProtKB/Swiss-Prot;Acc:P0C2G0]
A5SS	AT1G64230	1	+	23833550	23833672	23833550	23833671	23833769	23833861	0.00361376	0.146564	1.0,1.0,1.0	1.0,1.0,0.0	0.333	UBC28	Ubiquitin-conjugating enzyme E2 28 [Source:UniProtKB/Swiss-Prot;Acc:Q94F47]
A5SS	AT1G52360	1	+	19505193	19505427	19505193	19505403	19505698	19506170	0.00361219	0.146564	0.98,0.884,0.978	0.83,0.9,0.848	0.088		Coatomer subunit beta'-2 [Source:UniProtKB/Swiss-Prot;Acc:Q9C827]
A5SS	AT5G46400	5	+	18820459	18820685	18820459	18820681	18820943	18821111	0.00364359	0.146934	0.662,0.329,0.14	0.797,0.595,0.898	-0.386	AT PRP39-2	Tetratricopeptide repeat (TPR)-like superfamily protein [Source:TAIR;Acc:AT5G46400]
A5SS	AT4G31170	4	-	15155466	15155703	15155471	15155703	15155047	15155118	0.00368188	0.148058	0.582,0.712,0.866	0.468,0.374,0.626	0.231		Protein kinase superfamily protein [Source:TAIR;Acc:AT4G31170]
A5SS	AT4G10100	4	+	6308682	6308849	6308682	6308832	6309084	6309546	0.00370985	0.148761	0.425,0.416,0.414	0.261,0.318,0.348	0.109	CNX7	Molybdopterin synthase sulfur carrier subunit [Source:UniProtKB/Swiss-Prot;Acc:Q9S7A3]
A5SS	AT5G64070	5	-	25638859	25638978	25638873	25638978	25638532	25638586	0.00372486	0.148942	0.034,0.093,0.178	0.062,0.057,0.0	0.062	PI4KB1	Phosphatidylinositol 4-kinase beta 1 [Source:UniProtKB/Swiss-Prot;Acc:Q9FMJ0]
A5SS	AT1G15410	1	+	5298323	5298386	5298323	5298339	5298572	5300293	0.00374283	0.14924	0.217,0.298,0.572	0.647,0.832,0.534	-0.309		aspartate-glutamate racemase family [Source:TAIR;Acc:AT1G15410]
A5SS	AT1G64530	1	+	23960847	23960927	23960847	23960895	23961023	23961936	0.00375564	0.149332	0.238,0.259,0.136	0.346,0.342,0.325	-0.127	NLP6	Protein NLP6 [Source:UniProtKB/Swiss-Prot;Acc:Q8RWY4]
A5SS	AT1G24030	1	+	8503233	8503502	8503233	8503460	8503601	8503789	0.00378586	0.150113	0.08,0.402,0.222	0.573,0.485,0.779	-0.378		Protein kinase superfamily protein [Source:TAIR;Acc:AT1G24030]
A5SS	AT5G18170	5	+	6006517	6006675	6006517	6006608	6006740	6006962	0.00410057	0.160795	0.883,1.0,0.958	1.0,1.0,1.0	-0.053	GDH1	Glutamate dehydrogenase 1 [Source:UniProtKB/Swiss-Prot;Acc:Q43314]
A5SS	AT1G76570	1	+	28729764	28729968	28729764	28729840	28730048	28730181	0.0040989	0.160795	0.053,0.04,0.0	0.051,0.099,0.119	-0.059		Chlorophyll A-B binding family protein [Source:TAIR;Acc:AT1G76570]
A5SS	AT3G23050	3	+	8196074	8196514	8196074	8196214	8196522	8196584	0.00408169	0.160795	1.0,0.867,1.0	1.0,0.885,0.792	0.063	IAA7	Auxin-responsive protein IAA7 [Source:UniProtKB/Swiss-Prot;Acc:Q38825]
A5SS	AT3G52260	3	-	19384455	19384525	19384459	19384525	19383915	19384005	0.00414409	0.161942	0.0,0.0,1.0	1.0,0.0,1.0	-0.333		RNA pseudouridine synthase 5 [Source:UniProtKB/Swiss-Prot;Acc:Q5M721]
A5SS	AT3G27610	3	-	10227887	10227986	10227892	10227986	10227723	10227808	0.00425532	0.165039	1.0,0.891,0.915	0.847,0.796,0.779	0.128		Nucleotidylyl transferase superfamily protein [Source:TAIR;Acc:AT3G27610]
A5SS	AT5G08185	5	-	2635321	2635438	2635344	2635438	2635133	2635226	0.0042982	0.165599	0.867,0.952,0.94	0.978,1.0,1.0	-0.073	MIR162A	microRNA162A [Source:TAIR;Acc:AT5G08185]
A5SS	AT5G05965	5	-	1791820	1791885	1791825	1791885	1791176	1791362	0.00430476	0.165599	0.049,0.0,0.0	0.054,0.096,0.057	-0.053		unknown protein; FUNCTIONS IN: molecular_function unknown; INVOLVED IN: biological_process unknown; LOCATED IN: chloroplast; BEST Arabidopsis thaliana protein match is: unknown protein (TAIR:AT2G39855.2); Has 30201 Blast hits to 17322 proteins in 78 /.../ies: Archae - 12; Bacteria - 1396; Metazoa - 17338; Fungi - 3422; Plants - 5037; Viruses - 0; Other Eukaryotes - 2996 (source: NCBI BLink). [Sou…
A5SS	AT1G14700	1	+	5059472	5059635	5059472	5059621	5059725	5059823	0.00435005	0.166043	0.674,0.589,0.648	0.84,0.965,0.734	-0.209	PAP3	Purple acid phosphatase 3 [Source:UniProtKB/Swiss-Prot;Acc:Q8H129]
A5SS	AT3G52030	3	+	19302550	19302772	19302550	19302649	19302927	19303031	0.00434825	0.166043	0.025,0.045,0.053	0.233,0.136,0.0	-0.082		F-box/WD-40 repeat-containing protein At3g52030 [Source:UniProtKB/Swiss-Prot;Acc:Q9SV01]
A5SS	AT5G37370	5	-	14814948	14815052	14814986	14815052	14814767	14814848	0.0043613	0.166043	0.167,0.616,1.0	1.0,0.849,1.0	-0.355	ATSRL1	PRP38 family protein [Source:TAIR;Acc:AT5G37370]
A5SS	AT2G24020	2	-	10218030	10218251	10218038	10218251	10217640	10217943	0.0043631	0.166043	0.778,0.589,0.614	0.817,1.0,1.0	-0.279		Uncharacterised BCR, YbaB family COG0718 [Source:TAIR;Acc:AT2G24020]
A5SS	AT5G62950	5	-	25263289	25263419	25263370	25263419	25263025	25263154	0.00449529	0.170162	0.328,0.153,0.157	0.0,0.098,0.054	0.162		RNA polymerase II, Rpb4, core protein [Source:TAIR;Acc:AT5G62950]
A5SS	AT1G71810	1	-	27006076	27006155	27006091	27006155	27005784	27005875	0.00451721	0.170537	0.0,0.046,0.137	0.281,0.061,0.134	-0.098		Uncharacterized aarF domain-containing protein kinase At1g71810, chloroplastic [Source:UniProtKB/Swiss-Prot;Acc:Q94BU1]
A5SS	AT1G78780	1	-	29622302	29622447	29622363	29622447	29622077	29622210	0.00466475	0.174385	1.0,0.928,1.0	0.88,0.906,0.909	0.078		pathogenesis-related family protein [Source:TAIR;Acc:AT1G78780]
A5SS	AT5G52910	5	-	21459068	21459297	21459189	21459297	21458811	21458985	0.00468168	0.174426	0.113,0.058,0.1	0.0,0.0,0.0	0.09	ATIM	timeless family protein [Source:TAIR;Acc:AT5G52910]
A5SS	AT2G48060	2	-	19658501	19658675	19658506	19658675	19658120	19658354	0.00477404	0.177402	1.0,0.951,0.898	0.847,0.844,0.854	0.101		Piezo-type mechanosensitive ion channel homolog [Source:UniProtKB/Swiss-Prot;Acc:F4IN58]
A5SS	AT3G09370	3	+	2879898	2880059	2879898	2880050	2880171	2880223	0.00482328	0.17814	0.916,1.0,1.0	0.965,0.928,0.832	0.064	MYB3R-3	myb domain protein 3r-3 [Source:TAIR;Acc:AT3G09370]
A5SS	AT4G25600	4	+	13060911	13061036	13060911	13061031	13061145	13061203	0.00480719	0.17814	0.231,0.0,0.103	0.245,0.46,0.369	-0.247	P4H12	Probable prolyl 4-hydroxylase 12 [Source:UniProtKB/Swiss-Prot;Acc:Q8GXT7]
A5SS	AT4G35110	4	-	16714134	16714398	16714331	16714398	16713863	16714009	0.00496133	0.182451	0.538,0.6,0.417	1.0,0.429,1.0	-0.291		Arabidopsis phospholipase-like protein (PEARLI 4) family [Source:TAIR;Acc:AT4G35110]
A5SS	AT1G65960	1	+	24554412	24554580	24554412	24554465	24555768	24555969	0.00503095	0.183584	1.0,1.0,1.0	0.498,1.0,0.739	0.254	GAD2	Glutamate decarboxylase 2 [Source:UniProtKB/Swiss-Prot;Acc:Q42472]
A5SS	AT5G54920	5	+	22303033	22303148	22303033	22303133	22303488	22303550	0.0050122	0.183584	0.059,0.071,0.106	0.136,0.234,0.194	-0.109		unknown protein; BEST Arabidopsis thaliana protein match is: unknown protein (TAIR:AT4G26990.1); Has 30201 Blast hits to 17322 proteins in 780 species: Archae - 12; Bacteria - 1396; Metazoa - 17338; Fungi - 3422; Plants - 5037; Viruses - 0; Other Eu /.../es - 2996 (source: NCBI BLink). [Source:TAIR;Acc:AT5G54920]
A5SS	AT5G49900	5	-	20300615	20300716	20300623	20300716	20300418	20300522	0.00503014	0.183584	0.948,0.827,0.92	0.972,1.0,1.0	-0.092		Beta-glucosidase, GBA2 type family protein [Source:TAIR;Acc:AT5G49900]
A5SS	AT2G14530	2	+	6188028	6188206	6188028	6188202	6188432	6188573	0.00509678	0.18551	0.662,0.942,1.0	0.725,0.746,0.698	0.145	TBL13	Protein trichome birefringence-like 13 [Source:UniProtKB/Swiss-Prot;Acc:Q9ZQR5]
A5SS	AT2G37260	2	+	15644839	15645084	15644839	15645066	15645268	15645489	0.00512347	0.18553	1.0,1.0,1.0	0.767,0.836,1.0	0.132	WRKY44	WRKY transcription factor 44 [Source:UniProtKB/Swiss-Prot;Acc:Q9ZUU0]
A5SS	AT1G01760	1	-	276636	276789	276705	276789	276404	276519	0.00520551	0.188021	0.215,0.507,0.36	0.071,0.215,0.121	0.225		adenosine deaminases;RNA binding;RNA binding;adenosine deaminases [Source:TAIR;Acc:AT1G01760]
A5SS	AT3G11890	3	+	3755541	3755708	3755541	3755697	3756019	3757775	0.00524127	0.188354	0.584,1.0,1.0	0.0,1.0,0.385	0.4		Sterile alpha motif (SAM) domain-containing protein [Source:TAIR;Acc:AT3G11890]
A5SS	AT4G39970	4	-	18537431	18537620	18537545	18537620	18537272	18537328	0.00523781	0.188354	0.363,0.74,0.0	0.587,1.0,1.0	-0.495		Haloacid dehalogenase-like hydrolase domain-containing protein At4g39970 [Source:UniProtKB/Swiss-Prot;Acc:Q680K2]
A5SS	AT3G59340	3	-	21931476	21931570	21931486	21931570	21930900	21931062	0.0053098	0.190335	0.095,0.031,0.17	0.0,0.0,0.0	0.099		Eukaryotic protein of unknown function (DUF914) [Source:TAIR;Acc:AT3G59340]
A5SS	AT1G71720	1	+	26984843	26984941	26984843	26984920	26985026	26985107	0.00535211	0.191368	1.0,0.888,0.907	0.861,0.717,0.833	0.128		Nucleic acid-binding proteins superfamily [Source:TAIR;Acc:AT1G71720]
A5SS	AT1G75010	1	-	28168043	28168161	28168048	28168161	28167897	28167969	0.00543591	0.19351	0.0,0.0,0.065	0.158,0.0,0.098	-0.064	ARC3	Protein ACCUMULATION AND REPLICATION OF CHLOROPLASTS 3 [Source:UniProtKB/Swiss-Prot;Acc:Q6F6B5]
A5SS	AT1G68010	1	+	25495106	25495314	25495106	25495180	25495394	25495509	0.00553379	0.19638	1.0,1.0,0.27	1.0,1.0,1.0	-0.243	HPR	Glycerate dehydrogenase HPR, peroxisomal [Source:UniProtKB/Swiss-Prot;Acc:Q9C9W5]
A5SS	AT5G26680	5	-	9312085	9312304	9312120	9312304	9311874	9311956	0.00554992	0.196462	1.0,0.213,0.74	1.0,0.851,1.0	-0.299	FEN1	Flap endonuclease 1 [Source:UniProtKB/Swiss-Prot;Acc:O65251]
A5SS	AT4G12680	4	+	7475103	7475325	7475103	7475197	7475494	7475603	0.00567869	0.198549	0.0,0.0,1.0	1.0,0.351,0.302	-0.218		unknown protein; INVOLVED IN: vegetative to reproductive phase transition of meristem; LOCATED IN: endomembrane system; BEST Arabidopsis thaliana protein match is: unknown protein (TAIR:AT5G40640.1); Has 103 Blast hits to 103 proteins in 14 species: /.../e - 0; Bacteria - 0; Metazoa - 0; Fungi - 0; Plants - 103; Viruses - 0; Other Eukaryotes - 0 (source: NCBI BLink). [Source:TAIR;Acc:AT4G12680]
A5SS	AT5G01510	5	+	202389	202523	202389	202490	202608	202679	0.00571093	0.199181	0.852,0.452,0.236	0.852,0.767,1.0	-0.36	RUS5	Protein root UVB sensitive 5 [Source:UniProtKB/Swiss-Prot;Acc:B6IDH3]
A5SS	AT1G16710	1	+	5715375	5715651	5715375	5715520	5715723	5716316	0.00575293	0.199665	0.411,0.562,0.621	0.651,0.851,0.815	-0.241	HAC12	Histone acetyltransferase HAC12 [Source:UniProtKB/Swiss-Prot;Acc:Q9FWQ5]
A5SS	AT3G16260	3	+	5510322	5510394	5510322	5510366	5510482	5510878	0.0057782	0.200053	0.137,0.192,0.115	0.535,0.15,0.414	-0.218	TRZ4	tRNAse Z4 [Source:TAIR;Acc:AT3G16260]
A5SS	AT2G46270	2	+	19002054	19002230	19002054	19002161	19002321	19002399	0.00593849	0.204109	0.398,0.39,0.293	0.448,0.553,0.436	-0.119	GBF3	G-box-binding factor 3 [Source:UniProtKB/Swiss-Prot;Acc:P42776]
A5SS	AT1G79820	1	-	30025710	30025859	30025726	30025859	30025210	30025310	0.00600067	0.204759	0.112,0.046,0.041	0.029,0.0,0.0	0.057	SGB1	Probable plastidic glucose transporter 3 [Source:UniProtKB/Swiss-Prot;Acc:Q2V4B9]
A5SS	AT1G13940	1	-	4766395	4766749	4766593	4766749	4765683	4765925	0.00600036	0.204759	0.92,0.841,0.917	0.968,0.969,0.971	-0.077		Plant protein of unknown function (DUF863) [Source:TAIR;Acc:AT1G13940]
A5SS	AT4G24230	4	-	12567148	12567362	12567237	12567362	12566630	12567144	0.00603832	0.205549	0.95,1.0,1.0	0.914,0.91,0.91	0.072	ACBP3	Acyl-CoA-binding domain-containing protein 3 [Source:UniProtKB/Swiss-Prot;Acc:Q9STX1]
A5SS	AT4G18290	4	+	10117498	10117688	10117498	10117684	10117786	10118276	0.0061288	0.20813	0.0,0.0,0.0	0.131,0.028,0.028	-0.062	KAT2	Potassium channel KAT2 [Source:UniProtKB/Swiss-Prot;Acc:Q38849]
A5SS	AT2G35550	2	+	14929280	14929448	14929280	14929401	14929889	14930892	0.00615084	0.208155	0.656,1.0,0.656	0.433,0.0,0.534	0.448	BPC7	Protein BASIC PENTACYSTEINE7 [Source:UniProtKB/Swiss-Prot;Acc:O82286]
A5SS	AT3G27470	3	+	10163048	10163270	10163048	10163170	10163691	10163811	0.00624225	0.208491	0.21,0.251,0.241	0.153,0.082,0.19	0.092		Protein of unknown function (DUF707) [Source:TAIR;Acc:AT3G27470]
A5SS	AT3G26440	3	+	9676563	9677043	9676563	9676741	9677357	9677449	0.00622304	0.208491	0.152,0.148,0.141	0.07,0.108,0.086	0.059		Protein of unknown function (DUF707) [Source:TAIR;Acc:AT3G26440]
A5SS	AT4G16695	4	+	9394420	9394573	9394420	9394569	9395060	9395142	0.00631079	0.210286	0.362,0.378,0.353	0.543,0.528,0.582	-0.187		unknown protein; FUNCTIONS IN: molecular_function unknown; INVOLVED IN: biological_process unknown; LOCATED IN: endomembrane system; Has 35333 Blast hits to 34131 proteins in 2444 species: Archae - 798; Bacteria - 22429; Metazoa - 974; Fungi - 991; /.../ - 531; Viruses - 0; Other Eukaryotes - 9610 (source: NCBI BLink). [Source:TAIR;Acc:AT4G16695]
A5SS	AT3G62090	3	-	22989725	22989970	22989869	22989970	22989557	22989623	0.00634547	0.210946	0.891,0.954,0.754	0.655,0.88,0.468	0.199	PIF6	Transcription factor PIF6 [Source:UniProtKB/Swiss-Prot;Acc:Q8L5W7]
A5SS	AT1G11720	1	+	3951552	3951711	3951552	3951662	3952344	3953618	0.00636299	0.211034	0.89,0.924,0.941	0.932,1.0,1.0	-0.059	SS3	Starch synthase 3, chloroplastic/amyloplastic [Source:UniProtKB/Swiss-Prot;Acc:F4IAG2]
A5SS	AT5G19210	5	+	6461995	6462105	6461995	6462097	6462179	6462293	0.00640096	0.211799	1.0,0.89,1.0	0.827,0.966,0.88	0.072	RH58	DEAD-box ATP-dependent RNA helicase 58, chloroplastic [Source:UniProtKB/Swiss-Prot;Acc:Q3E9C3]
A5SS	AT4G13150	4	-	7650786	7650985	7650790	7650985	7650651	7650717	0.00652375	0.21536	0.186,0.0,0.032	0.0,0.019,0.0	0.066		unknown protein; Has 83 Blast hits to 82 proteins in 37 species: Archae - 0; Bacteria - 51; Metazoa - 0; Fungi - 0; Plants - 30; Viruses - 0; Other Eukaryotes - 2 (source: NCBI BLink). [Source:TAIR;Acc:AT4G13150]
A5SS	AT1G06210	1	+	1897202	1897378	1897202	1897300	1897561	1898052	0.00667445	0.218897	1.0,0.397,0.569	0.698,0.0,1.0	0.089		ENTH/VHS/GAT family protein [Source:TAIR;Acc:AT1G06210]
A5SS	AT3G45850	3	-	16861261	16861527	16861365	16861527	16860783	16860980	0.00667718	0.218897	1.0,0.899,0.889	0.703,0.796,0.87	0.14		P-loop containing nucleoside triphosphate hydrolases superfamily protein [Source:TAIR;Acc:AT3G45850]
A5SS	AT5G03960	5	-	1069914	1069978	1069919	1069978	1069608	1069696	0.00696064	0.227664	0.178,0.358,0.565	0.056,0.104,0.218	0.241	IQD12	IQ-domain 12 [Source:TAIR;Acc:AT5G03960]
A5SS	AT4G14965	4	+	8552722	8552769	8552722	8552747	8552923	8553098	0.00706709	0.228174	0.909,0.862,0.859	0.888,0.992,0.93	-0.06	MAPR4	Membrane-associated progesterone-binding protein 4 [Source:UniProtKB/Swiss-Prot;Acc:Q2HIW2]
A5SS	AT3G48200	3	-	17836362	17836564	17836410	17836564	17836046	17836122	0.00701997	0.228174	1.0,1.0,1.0	0.896,0.869,1.0	0.078		unknown protein; FUNCTIONS IN: molecular_function unknown; INVOLVED IN: biological_process unknown; LOCATED IN: endomembrane system; EXPRESSED IN: 21 plant structures; EXPRESSED DURING: 13 growth stages; Has 210 Blast hits to 148 proteins in 42 spec /.../rchae - 0; Bacteria - 118; Metazoa - 0; Fungi - 0; Plants - 48; Viruses - 0; Other Eukaryotes - 44 (source: NCBI BLink). [Source:TAIR;Acc:AT3G48…
A5SS	AT1G54360	1	+	20291301	20291378	20291301	20291357	20291457	20291595	0.00700728	0.228174	0.882,0.883,0.849	0.964,0.937,0.897	-0.061	TAF6B	Transcription initiation factor TFIID subunit 6b [Source:UniProtKB/Swiss-Prot;Acc:F4HVA6]
A5SS	AT3G17910	3	+	6134479	6134724	6134479	6134718	6135201	6135376	0.00703772	0.228174	0.209,0.106,0.162	0.0,0.112,0.04	0.108	SURF1	Surfeit locus protein 1 [Source:UniProtKB/Swiss-Prot;Acc:Q9SE51]
A5SS	AT2G32295	2	+	13720415	13720513	13720415	13720511	13720598	13720712	0.00717428	0.229367	0.381,0.303,0.386	0.614,0.537,0.522	-0.201		EXS (ERD1/XPR1/SYG1) family protein [Source:TAIR;Acc:AT2G32295]
A5SS	AT5G01950	5	-	368420	368490	368453	368490	368265	368337	0.00720906	0.229961	0.908,1.0,0.787	0.59,1.0,0.664	0.147		Leucine-rich repeat protein kinase family protein [Source:TAIR;Acc:AT5G01950]
A5SS	AT2G32487	2	+	13791886	13792018	13791886	13791979	13792154	13792240	0.00725099	0.230264	0.132,0.087,0.181	0.155,0.0,0.0	0.082		unknown protein; FUNCTIONS IN: molecular_function unknown; INVOLVED IN: biological_process unknown; LOCATED IN: endomembrane system; Has 1 Blast hits to 1 proteins in 1 species: Archae - 0; Bacteria - 0; Metazoa - 0; Fungi - 0; Plants - 1; Viruses - /.../her Eukaryotes - 0 (source: NCBI BLink). [Source:TAIR;Acc:AT2G32487]
A5SS	AT4G03020	4	-	1335015	1335045	1335022	1335045	1334034	1334545	0.00729969	0.230777	0.658,0.634,0.562	0.841,0.871,0.852	-0.237		transducin family protein / WD-40 repeat family protein [Source:TAIR;Acc:AT4G03020]
A5SS	AT1G31120	1	-	11106503	11106720	11106508	11106720	11106369	11106420	0.00728662	0.230777	0.104,0.041,0.049	0.0,0.013,0.012	0.056	POT10	Potassium transporter 10 [Source:UniProtKB/Swiss-Prot;Acc:Q9SA05]
A5SS	AT5G60600	5	+	24359233	24359324	24359233	24359257	24359424	24359654	0.00732442	0.231045	0.0,0.257,0.065	0.0,0.0,0.122	0.067	ISPG	4-hydroxy-3-methylbut-2-en-1-yl diphosphate synthase (ferredoxin), chloroplastic [Source:UniProtKB/Swiss-Prot;Acc:F4K0E8]
A5SS	AT3G52030	3	+	19302550	19302772	19302550	19302644	19302927	19303031	0.00743447	0.233495	1.0,1.0,1.0	1.0,0.605,1.0	0.132		F-box/WD-40 repeat-containing protein At3g52030 [Source:UniProtKB/Swiss-Prot;Acc:Q9SV01]
A5SS	AT1G51590	1	-	19130778	19130857	19130791	19130857	19130476	19130651	0.00743498	0.233495	0.049,0.055,0.08	0.106,0.121,0.135	-0.059	MNS1	Mannosyl-oligosaccharide 1,2-alpha-mannosidase MNS1 [Source:UniProtKB/Swiss-Prot;Acc:Q9C512]
A5SS	AT3G44740	3	-	16296271	16296454	16296399	16296454	16295969	16296153	0.00749681	0.234917	0.43,0.0,0.351	0.351,0.574,1.0	-0.381		Class II aaRS and biotin synthetases superfamily protein [Source:TAIR;Acc:AT3G44740]
A5SS	AT2G38180	2	+	15998134	15998278	15998134	15998220	15998363	15998906	0.00756331	0.236478	0.905,0.809,0.97	1.0,1.0,0.876	-0.064		GDSL esterase/lipase At2g38180 [Source:UniProtKB/Swiss-Prot;Acc:O80443]
A5SS	AT5G37370	5	-	14814977	14815006	14814986	14815006	14814767	14814848	0.00760978	0.237408	0.487,0.74,1.0	1.0,0.905,1.0	-0.226	ATSRL1	PRP38 family protein [Source:TAIR;Acc:AT5G37370]
A5SS	AT3G52260	3	-	19386093	19386272	19386211	19386272	19385973	19386020	0.00791246	0.245235	1.0,1.0,1.0	1.0,0.87,0.412	0.239		RNA pseudouridine synthase 5 [Source:UniProtKB/Swiss-Prot;Acc:Q5M721]
A5SS	AT5G46400	5	+	18820459	18820689	18820459	18820681	18820943	18821111	0.00813342	0.250479	0.901,0.901,0.741	0.972,0.942,0.956	-0.109	AT PRP39-2	Tetratricopeptide repeat (TPR)-like superfamily protein [Source:TAIR;Acc:AT5G46400]
A5SS	AT2G04790	2	+	1679825	1679909	1679825	1679886	1680014	1680543	0.00823293	0.252411	0.418,0.309,0.38	0.245,0.242,0.235	0.128		unknown protein; Has 45 Blast hits to 45 proteins in 15 species: Archae - 0; Bacteria - 0; Metazoa - 0; Fungi - 0; Plants - 43; Viruses - 0; Other Eukaryotes - 2 (source: NCBI BLink). [Source:TAIR;Acc:AT2G04790]
A5SS	AT1G17410	1	-	5969011	5969165	5969057	5969165	5968776	5968886	0.00832353	0.254639	0.016,0.0,0.031	0.0,0.138,0.083	-0.058		Probable nucleoside diphosphate kinase 5 [Source:UniProtKB/Swiss-Prot;Acc:Q6NLG3]
A5SS	AT5G10940	5	-	3452084	3452190	3452094	3452190	3451435	3451575	0.00838744	0.256042	0.954,0.96,0.809	0.963,0.967,0.974	-0.06		transducin family protein / WD-40 repeat family protein [Source:TAIR;Acc:AT5G10940]
A5SS	AT4G25880	4	+	13158571	13158760	13158571	13158743	13159055	13159382	0.00850788	0.258054	0.042,0.071,0.047	0.092,0.097,0.136	-0.055	APUM6	Pumilio homolog 6, chloroplastic [Source:UniProtKB/Swiss-Prot;Acc:Q9C5E7]
A5SS	AT1G18700	1	+	6442905	6443261	6442905	6443029	6443782	6444076	0.00856457	0.25922	0.943,0.73,0.838	0.722,0.739,0.5	0.183		DNAJ heat shock N-terminal domain-containing protein [Source:TAIR;Acc:AT1G18700]
A5SS	AT3G53830	3	+	19942852	19943052	19942852	19942943	19943309	19943353	0.00870457	0.260678	0.137,0.0,0.0	0.258,0.258,0.072	-0.15		Regulator of chromosome condensation (RCC1) family protein [Source:TAIR;Acc:AT3G53830]
A5SS	AT3G19460	3	+	6748758	6748907	6748758	6748900	6748990	6749307	0.00870087	0.260678	0.794,1.0,0.658	0.243,0.771,0.0	0.479	RTNLB11	Reticulon-like protein B11 [Source:UniProtKB/Swiss-Prot;Acc:Q9LT71]
A5SS	AT5G02810	5	-	640084	640202	640131	640202	639813	639993	0.0086623	0.260678	1.0,1.0,0.739	1.0,1.0,0.963	-0.075	APRR7	Two-component response regulator-like APRR7 [Source:UniProtKB/Swiss-Prot;Acc:Q93WK5]
A5SS	AT3G15240	3	+	5134495	5134641	5134495	5134630	5134791	5134897	0.0087026	0.260678	0.349,0.109,0.428	0.176,0.118,0.0	0.197		Serine/threonine-protein kinase WNK (With No Lysine)-related [Source:TAIR;Acc:AT3G15240]
A5SS	AT5G48630	5	-	19722480	19722600	19722521	19722600	19722275	19722390	0.00874194	0.261246	0.738,0.798,0.95	0.863,0.967,1.0	-0.115	CYCC1-2	Cyclin-C1-2 [Source:UniProtKB/Swiss-Prot;Acc:Q9FJK7]
A5SS	AT1G04080	1	+	1054484	1054555	1054484	1054532	1054662	1054806	0.0088607	0.263685	0.937,0.699,1.0	0.654,0.781,0.865	0.112	PRP39	Tetratricopeptide repeat (TPR)-like superfamily protein [Source:TAIR;Acc:AT1G04080]
A5SS	AT3G44400	3	-	16046058	16046201	16046171	16046201	16044686	16045026	0.00916323	0.271549	0.097,0.114,0.09	0.037,0.063,0.032	0.056		Disease resistance protein (TIR-NBS-LRR class) family [Source:TAIR;Acc:AT3G44400]
A5SS	AT3G09670	3	+	2966374	2966520	2966374	2966513	2966615	2968972	0.00919514	0.271927	0.0,0.194,0.0	0.032,0.259,0.149	-0.082		Tudor/PWWP/MBT superfamily protein [Source:TAIR;Acc:AT3G09670]
A5SS	AT3G12810	3	+	4067642	4067711	4067642	4067704	4067792	4067915	0.00943222	0.27615	0.249,0.402,0.335	0.823,0.369,0.616	-0.274	PIE1	Protein PHOTOPERIOD-INDEPENDENT EARLY FLOWERING 1 [Source:UniProtKB/Swiss-Prot;Acc:Q7X9V2]
A5SS	AT4G27620	4	-	13790749	13790983	13790907	13790983	13790329	13790561	0.00974253	0.283974	0.042,0.147,0.04	0.241,0.07,0.178	-0.087		unknown protein; FUNCTIONS IN: molecular_function unknown; INVOLVED IN: biological_process unknown; LOCATED IN: mitochondrion; EXPRESSED IN: 18 plant structures; EXPRESSED DURING: 11 growth stages; BEST Arabidopsis thaliana protein match is: unknown /.../in (TAIR:AT4G27610.3); Has 30201 Blast hits to 17322 proteins in 780 species: Archae - 12; Bacteria - 1396; Metazoa - 17338; Fungi - 3422; Plant…
A5SS	AT4G33530	4	-	16128237	16128413	16128279	16128413	16127905	16128160	0.00981917	0.285442	0.106,0.176,0.172	0.225,0.254,0.177	-0.067	POT13	Potassium transporter 13 [Source:UniProtKB/Swiss-Prot;Acc:Q8LPL8]
A5SS	AT1G20540	1	+	7113212	7113306	7113212	7113293	7113438	7113538	0.00991906	0.285601	0.92,0.946,0.952	0.884,0.862,0.843	0.076		Transducin/WD40 repeat-like superfamily protein [Source:TAIR;Acc:AT1G20540]
A5SS	AT5G57180	5	+	23170123	23170463	23170123	23170276	23170712	23170999	0.00990238	0.285601	0.215,0.375,0.153	0.073,0.146,0.137	0.129	CIA2	Protein CHLOROPLAST IMPORT APPARATUS 2 [Source:UniProtKB/Swiss-Prot;Acc:Q9LU68]
A5SS	AT4G21430	4	-	11410762	11410868	11410767	11410868	11410525	11410658	0.00989684	0.285601	1.0,1.0,0.877	0.867,0.923,0.836	0.084	B160	Zinc finger, RING-type;Transcription factor jumonji/aspartyl beta-hydroxylase [Source:TAIR;Acc:AT4G21430]
A5SS	AT2G36740	2	-	15407394	15407512	15407446	15407512	15407046	15407261	0.00988349	0.285601	0.0,0.0,0.019	0.014,0.162,0.019	-0.059	SWC2	SWR1 complex subunit 2 [Source:UniProtKB/Swiss-Prot;Acc:F4IP06]
A5SS	AT2G30530	2	+	13010075	13010224	13010075	13010219	13010366	13010530	0.0101246	0.290342	0.178,0.243,0.075	0.297,0.285,0.234	-0.107		unknown protein; LOCATED IN: cellular_component unknown; EXPRESSED IN: 25 plant structures; EXPRESSED DURING: 15 growth stages; BEST Arabidopsis thaliana protein match is: unknown protein (TAIR:AT5G01970.1); Has 5513 Blast hits to 872 proteins in 15 /.../ies: Archae - 0; Bacteria - 30; Metazoa - 615; Fungi - 144; Plants - 149; Viruses - 12; Other Eukaryotes - 4563 (source: NCBI BLink). [Source:TA…
A5SS	AT1G16540	1	+	5664357	5664590	5664357	5664586	5664660	5664794	0.0101834	0.291439	1.0,1.0,0.979	0.976,1.0,0.797	0.069	ABA3	Molybdenum cofactor sulfurase [Source:UniProtKB/Swiss-Prot;Acc:Q9C5X8]
A5SS	AT2G29940	2	+	12763667	12763824	12763667	12763741	12763913	12764077	0.0102195	0.291883	1.0,0.795,0.53	1.0,1.0,0.9	-0.192	ABCG31	ABC transporter G family member 31 [Source:UniProtKB/Swiss-Prot;Acc:Q7PC88]
A5SS	AT2G32700	2	+	13866771	13867128	13866771	13866926	13867214	13867266	0.0102424	0.29195	1.0,0.972,1.0	0.953,0.855,1.0	0.055	LUH	LEUNIG_homolog [Source:TAIR;Acc:AT2G32700]
A5SS	AT1G62330	1	+	23048342	23048440	23048342	23048431	23048539	23048660	0.0102851	0.29258	0.04,0.0,0.076	0.17,0.116,0.024	-0.065		O-fucosyltransferase family protein [Source:TAIR;Acc:AT1G62330]
A5SS	AT4G39460	4	-	18358011	18358138	18358055	18358138	18357786	18357925	0.0104707	0.295715	0.404,0.845,0.895	0.264,0.28,0.526	0.358	SAMC1	S-adenosylmethionine carrier 1, chloroplastic/mitochondrial [Source:UniProtKB/Swiss-Prot;Acc:Q94AG6]
A5SS	AT1G10320	1	-	3387220	3387409	3387250	3387409	3386977	3387012	0.0104787	0.295715	0.0,1.0,1.0	0.557,0.218,1.0	0.075		Zinc finger CCCH domain-containing protein 5 [Source:UniProtKB/Swiss-Prot;Acc:Q9SY74]
A5SS	AT1G31540	1	-	11290947	11291506	11291455	11291506	11289345	11290527	0.0104634	0.295715	0.897,0.887,0.97	1.0,1.0,0.946	-0.064		Disease resistance protein (TIR-NBS-LRR class) family [Source:TAIR;Acc:AT1G31540]
A5SS	AT4G30870	4	+	15029339	15029437	15029339	15029434	15029530	15029609	0.010542	0.296912	0.33,0.0,0.568	0.0,0.0,0.0	0.299	MUS81	Crossover junction endonuclease MUS81 [Source:UniProtKB/Swiss-Prot;Acc:Q5W9E7]
A5SS	AT1G16800	1	-	5753858	5754011	5753864	5754011	5753605	5753759	0.0108514	0.303835	0.492,0.326,0.0	0.721,0.659,0.492	-0.351		P-loop containing nucleoside triphosphate hydrolases superfamily protein [Source:TAIR;Acc:AT1G16800]
A5SS	AT3G54120	3	-	20041807	20041955	20041929	20041955	20041504	20041716	0.0108148	0.303835	1.0,0.821,1.0	0.878,1.0,0.734	0.07	RTNLB12	Reticulon-like protein B12 [Source:UniProtKB/Swiss-Prot;Acc:Q9M392]
A5SS	AT5G54250	5	-	22025552	22025837	22025629	22025837	22025285	22025518	0.010852	0.303835	0.841,0.665,0.181	0.0,0.117,0.356	0.405	CNGC4	Cyclic nucleotide-gated ion channel 4 [Source:UniProtKB/Swiss-Prot;Acc:Q94AS9]
A5SS	AT4G35785	4	-	16953701	16953890	16953703	16953890	16953522	16953592	0.010991	0.307121	0.0,1.0,0.0	0.249,0.383,0.09	0.093		RNA-binding (RRM/RBD/RNP motifs) family protein [Source:TAIR;Acc:AT4G35785]
A5SS	AT1G26440	1	-	9145199	9145340	9145300	9145340	9144994	9145114	0.0112552	0.312839	1.0,0.878,1.0	0.931,0.881,0.878	0.063	UPS5	Ureide permease 5 [Source:UniProtKB/Swiss-Prot;Acc:Q93Z75]
A5SS	AT5G35330	5	-	13525620	13525791	13525641	13525791	13524824	13525279	0.0113001	0.312839	0.16,0.241,0.267	0.342,0.288,0.393	-0.118	MBD2	Methyl-CpG-binding domain-containing protein 2 [Source:UniProtKB/Swiss-Prot;Acc:Q8LA53]
A5SS	AT3G05160	3	-	1455114	1455183	1455122	1455183	1454919	1455012	0.0112975	0.312839	0.851,1.0,1.0	0.69,0.827,0.87	0.155		Sugar transporter ERD6-like 10 [Source:UniProtKB/Swiss-Prot;Acc:Q93Z80]
A5SS	AT5G06670	5	-	2051719	2051935	2051830	2051935	2051532	2051637	0.0113279	0.312839	0.0,0.0,0.113	0.06,0.301,0.0	-0.083		P-loop containing nucleoside triphosphate hydrolases superfamily protein [Source:TAIR;Acc:AT5G06670]
A5SS	AT2G31870	2	-	13552022	13552127	13552032	13552127	13551772	13551891	0.0117028	0.320699	0.386,0.654,0.78	0.0,0.119,0.767	0.311	PARG1	Poly(ADP-ribose) glycohydrolase 1 [Source:UniProtKB/Swiss-Prot;Acc:Q9SKB3]
A5SS	AT2G17033	2	+	7401137	7401248	7401137	7401235	7401632	7402054	0.0117587	0.321607	0.151,0.036,0.179	0.236,0.296,0.34	-0.169		Pentatricopeptide repeat-containing protein At2g17033 [Source:UniProtKB/Swiss-Prot;Acc:Q8GWA9]
A5SS	AT4G19510	4	+	10637965	10638164	10637965	10638120	10638616	10639001	0.0118771	0.3236	0.853,0.721,0.886	0.718,0.554,0.58	0.203		Disease resistance protein (TIR-NBS-LRR class) [Source:TAIR;Acc:AT4G19510]
A5SS	AT5G18100	5	+	5988412	5988464	5988412	5988422	5988504	5988558	0.0119655	0.32476	1.0,0.758,0.44	1.0,0.0,0.37	0.276	CSD3	Superoxide dismutase [Cu-Zn] 3 [Source:UniProtKB/Swiss-Prot;Acc:Q9FK60]
A5SS	AT5G37370	5	-	14815164	14815286	14815171	14815286	14814986	14815052	0.0119526	0.32476	0.0,0.224,0.0	0.468,0.233,0.037	-0.171	ATSRL1	PRP38 family protein [Source:TAIR;Acc:AT5G37370]
A5SS	AT1G11270	1	-	3786797	3786990	3786901	3786990	3780428	3780697	0.0125044	0.336812	0.441,1.0,1.0	1.0,1.0,1.0	-0.186		F-box protein At1g11270 [Source:UniProtKB/Swiss-Prot;Acc:Q7X7A9]
A5SS	AT5G23870	5	-	8046192	8046452	8046326	8046452	8046148	8046185	0.0126748	0.340111	0.297,0.209,0.458	0.413,0.638,0.77	-0.286	PAE9	Pectin acetylesterase 9 [Source:UniProtKB/Swiss-Prot;Acc:B9DFR3]
A5SS	AT4G33130	4	-	15979578	15979783	15979582	15979783	15978988	15979502	0.0127488	0.341452	0.645,0.179,0.558	0.825,0.873,0.638	-0.318		unknown protein; FUNCTIONS IN: molecular_function unknown; INVOLVED IN: biological_process unknown; LOCATED IN: chloroplast; EXPRESSED IN: 9 plant structures; EXPRESSED DURING: 6 growth stages; BEST Arabidopsis thaliana protein match is: Protein of /.../n function, DUF547 (TAIR:AT1G16750.1); Has 192 Blast hits to 192 proteins in 18 species: Archae - 0; Bacteria - 0; Metazoa - 1; Fungi - 0; Plants…
A5SS	AT4G15090	4	+	8617517	8617589	8617517	8617586	8617677	8617725	0.0128494	0.341568	0.718,0.803,0.693	0.788,0.909,0.87	-0.118	FAR1	Protein FAR-RED IMPAIRED RESPONSE 1 [Source:UniProtKB/Swiss-Prot;Acc:Q9SWG3]
A5SS	AT5G22875	5	+	7650581	7650710	7650581	7650681	7651265	7651389	0.0128455	0.341568	0.069,0.123,0.149	0.053,0.066,0.059	0.054		unknown protein; FUNCTIONS IN: molecular_function unknown; INVOLVED IN: biological_process unknown; LOCATED IN: endomembrane system; EXPRESSED IN: 24 plant structures; EXPRESSED DURING: 15 growth stages; Has 30201 Blast hits to 17322 proteins in 780 /.../es: Archae - 12; Bacteria - 1396; Metazoa - 17338; Fungi - 3422; Plants - 5037; Viruses - 0; Other Eukaryotes - 2996 (source: NCBI BLink). [Sour…
A5SS	AT3G19190	3	+	6648175	6648291	6648175	6648280	6648417	6648457	0.0132188	0.349424	0.083,0.048,0.0	0.124,0.031,0.144	-0.056	ATATG2	autophagy 2 [Source:TAIR;Acc:AT3G19190]
A5SS	AT5G18310	5	+	6061698	6061939	6061698	6061927	6062149	6062404	0.0132841	0.350499	0.651,0.104,1.0	0.0,1.0,0.0	0.252		unknown protein; FUNCTIONS IN: molecular_function unknown; INVOLVED IN: biological_process unknown; LOCATED IN: plasma membrane; EXPRESSED IN: 22 plant structures; EXPRESSED DURING: 13 growth stages; Has 60 Blast hits to 60 proteins in 14 species: A /.../- 0; Bacteria - 0; Metazoa - 7; Fungi - 0; Plants - 53; Viruses - 0; Other Eukaryotes - 0 (source: NCBI BLink). [Source:TAIR;Acc:AT5G18310]
A5SS	AT1G50450	1	-	18689701	18689795	18689712	18689795	18689473	18689600	0.0133201	0.350797	0.02,0.065,0.029	0.052,0.11,0.105	-0.051		Saccharopine dehydrogenase [Source:TAIR;Acc:AT1G50450]
A5SS	AT3G49840	3	+	18485717	18485814	18485717	18485810	18485896	18486058	0.0134433	0.353383	0.187,0.311,0.227	0.595,0.296,0.515	-0.227		Uncharacterized conserved protein (DUF2215) [Source:TAIR;Acc:AT3G49840]
A5SS	AT2G41140	2	+	17151496	17151604	17151496	17151576	17151813	17151892	0.0134781	0.353644	1.0,1.0,0.377	1.0,1.0,1.0	-0.208	CRK1	CDPK-related kinase 1 [Source:UniProtKB/Swiss-Prot;Acc:O80673]
A5SS	AT1G15960	1	-	5484075	5484180	5484118	5484180	5483881	5483956	0.0135387	0.354579	1.0,1.0,0.661	1.0,1.0,1.0	-0.113	NRAMP6	Metal transporter Nramp6 [Source:UniProtKB/Swiss-Prot;Acc:Q9S9N8]
A5SS	AT2G43010	2	+	17886426	17886595	17886426	17886450	17886993	17887067	0.0136195	0.355842	1.0,0.731,0.856	1.0,0.887,1.0	-0.1	PIF4	Transcription factor PIF4 [Source:UniProtKB/Swiss-Prot;Acc:Q8W2F3]
A5SS	AT4G35300	4	-	16799263	16799300	16799289	16799300	16798992	16799167	0.0136508	0.355842	0.0,0.461,0.631	0.105,0.039,0.0	0.316	MSSP2	Monosaccharide-sensing protein 2 [Source:UniProtKB/Swiss-Prot;Acc:Q8LPQ8]
A5SS	AT3G61010	3	-	22573609	22573718	22573636	22573718	22573477	22573528	0.0136872	0.355842	0.557,0.503,0.442	0.615,0.745,0.57	-0.143		Ferritin/ribonucleotide reductase-like family protein [Source:TAIR;Acc:AT3G61010]
A5SS	AT4G13575	4	-	7893265	7893310	7893288	7893310	7893068	7893189	0.0136869	0.355842	0.502,0.567,0.494	0.663,0.65,0.581	-0.11		unknown protein; FUNCTIONS IN: molecular_function unknown; INVOLVED IN: biological_process unknown; LOCATED IN: cellular_component unknown; Has 30201 Blast hits to 17322 proteins in 780 species: Archae - 12; Bacteria - 1396; Metazoa - 17338; Fungi - /.../ Plants - 5037; Viruses - 0; Other Eukaryotes - 2996 (source: NCBI BLink). [Source:TAIR;Acc:AT4G13575]
A5SS	AT3G61010	3	-	22574305	22574491	22574454	22574491	22574072	22574183	0.0137289	0.356274	0.712,0.709,0.746	0.625,0.506,0.633	0.134		Ferritin/ribonucleotide reductase-like family protein [Source:TAIR;Acc:AT3G61010]
A5SS	AT1G77080	1	+	28958333	28958501	28958333	28958391	28958601	28958844	0.013789	0.357181	0.22,0.249,0.222	0.228,0.361,0.441	-0.113	AGL27	Agamous-like MADS-box protein AGL27 [Source:UniProtKB/Swiss-Prot;Acc:Q9AT76]
A5SS	AT4G35360	4	-	16813803	16813874	16813811	16813874	16813584	16813725	0.0138601	0.358368	1.0,1.0,0.674	1.0,1.0,1.0	-0.109		Uncharacterised conserved protein (UCP030210) [Source:TAIR;Acc:AT4G35360]
A5SS	AT1G70730	1	-	26671880	26672027	26671937	26672027	26671743	26671806	0.0142815	0.365759	1.0,1.0,0.897	1.0,1.0,0.612	0.095	PGM2	Probable phosphoglucomutase, cytoplasmic 2 [Source:UniProtKB/Swiss-Prot;Acc:Q9SGC1]
A5SS	AT1G04080	1	+	1054484	1054560	1054484	1054532	1054662	1054806	0.0142268	0.365759	0.871,0.772,1.0	0.679,0.724,0.819	0.14	PRP39	Tetratricopeptide repeat (TPR)-like superfamily protein [Source:TAIR;Acc:AT1G04080]
A5SS	AT3G30841	3	+	12591983	12592127	12591983	12592118	12592206	12592483	0.0143005	0.365759	0.655,1.0,1.0	0.655,0.487,0.655	0.286		Cofactor-independent phosphoglycerate mutase [Source:TAIR;Acc:AT3G30841]
A5SS	AT5G55520	5	-	22489451	22489505	22489463	22489505	22488593	22489364	0.0145259	0.370188	0.134,0.223,0.0	0.0,0.0,0.094	0.088		CONTAINS InterPro DOMAIN/s: Kinesin-related protein (InterPro:IPR010544); BEST Arabidopsis thaliana protein match is: unknown protein (TAIR:AT4G26660.1); Has 32425 Blast hits to 20462 proteins in 1550 species: Archae - 335; Bacteria - 3392; Metazoa /.../6; Fungi - 2645; Plants - 1561; Viruses - 54; Other Eukaryotes - 7442 (source: NCBI BLink). [Source:TAIR;Acc:AT5G55520]
A5SS	AT1G31850	1	+	11430221	11430452	11430221	11430448	11431135	11431443	0.0145807	0.37092	0.137,0.195,0.009	0.257,0.11,0.231	-0.086		Probable methyltransferase PMT20 [Source:UniProtKB/Swiss-Prot;Acc:Q9C6S7]
A5SS	AT5G17230	5	-	5662366	5662466	5662455	5662466	5661642	5662239	0.0147701	0.375064	0.082,0.127,0.04	0.077,0.261,0.261	-0.117	PSY1	Phytoene synthase, chloroplastic [Source:UniProtKB/Swiss-Prot;Acc:P37271]
A5SS	AT2G20400	2	+	8800602	8800679	8800602	8800644	8800769	8800809	0.0148308	0.375934	0.9,0.671,0.521	1.0,1.0,0.71	-0.206		myb-like HTH transcriptional regulator family protein [Source:TAIR;Acc:AT2G20400]
A5SS	AT5G26680	5	-	9312085	9312304	9312106	9312304	9311874	9311956	0.0149107	0.377286	0.688,0.112,0.306	0.861,0.424,0.907	-0.362	FEN1	Flap endonuclease 1 [Source:UniProtKB/Swiss-Prot;Acc:O65251]
A5SS	AT1G15960	1	-	5484068	5484180	5484118	5484180	5483881	5483956	0.0149826	0.377591	1.0,1.0,0.385	1.0,1.0,1.0	-0.205	NRAMP6	Metal transporter Nramp6 [Source:UniProtKB/Swiss-Prot;Acc:Q9S9N8]
A5SS	AT2G45540	2	-	18772631	18772831	18772640	18772831	18770275	18772281	0.0149664	0.377591	0.888,0.948,0.912	0.854,0.875,0.822	0.066		WD-40 repeat family protein / beige-related [Source:TAIR;Acc:AT2G45540]
A5SS	AT3G61010	3	-	22574291	22574491	22574454	22574491	22574072	22574183	0.0153757	0.385615	0.711,0.708,0.743	0.624,0.505,0.635	0.133		Ferritin/ribonucleotide reductase-like family protein [Source:TAIR;Acc:AT3G61010]
A5SS	AT2G20000	2	-	8635844	8635904	8635852	8635904	8635661	8635708	0.0154134	0.385878	1.0,1.0,1.0	0.873,1.0,0.961	0.055	CDC27B	Cell division cycle protein 27 homolog B [Source:UniProtKB/Swiss-Prot;Acc:Q8LGU6]
A5SS	AT2G41945	2	-	17510839	17511213	17511079	17511213	17509891	17509965	0.0155871	0.388895	0.862,0.833,0.89	0.849,0.722,0.634	0.127		unknown protein; BEST Arabidopsis thaliana protein match is: unknown protein (TAIR:AT3G04040.1); Has 35333 Blast hits to 34131 proteins in 2444 species: Archae - 798; Bacteria - 22429; Metazoa - 974; Fungi - 991; Plants - 531; Viruses - 0; Other Euk /.../s - 9610 (source: NCBI BLink). [Source:TAIR;Acc:AT2G41945]
A5SS	AT1G80190	1	+	30159076	30159332	30159076	30159245	30159439	30159550	0.0155887	0.388895	0.786,1.0,0.95	0.749,0.855,0.786	0.115	PSF1	partner of SLD five 1 [Source:TAIR;Acc:AT1G80190]
A5SS	AT4G04350	4	+	2129244	2129383	2129244	2129369	2129465	2129570	0.0156872	0.390667	0.939,0.982,0.897	0.837,0.88,0.894	0.069	EMB2369	tRNA synthetase class I (I, L, M and V) family protein [Source:TAIR;Acc:AT4G04350]
A5SS	AT1G32200	1	-	11604162	11604291	11604196	11604291	11603985	11604072	0.0160753	0.398534	1.0,1.0,1.0	0.818,0.621,1.0	0.187	ATS1	Glycerol-3-phosphate acyltransferase, chloroplastic [Source:UniProtKB/Swiss-Prot;Acc:Q43307]
A5SS	AT5G37380	5	-	14819034	14819069	14819062	14819069	14816758	14818457	0.0160874	0.398534	0.458,0.0,0.175	0.0,0.175,0.063	0.132		Chaperone DnaJ-domain superfamily protein [Source:TAIR;Acc:AT5G37380]
A5SS	AT5G26680	5	-	9312106	9312304	9312120	9312304	9311874	9311956	0.0161181	0.3986	1.0,0.682,0.835	1.0,0.88,1.0	-0.121	FEN1	Flap endonuclease 1 [Source:UniProtKB/Swiss-Prot;Acc:O65251]
A5SS	AT2G46540	2	-	19111180	19111240	19111181	19111240	19110471	19110722	0.0162338	0.400764	0.667,0.167,0.0	0.0,0.0,0.0	0.278		unknown protein; FUNCTIONS IN: molecular_function unknown; INVOLVED IN: biological_process unknown; LOCATED IN: mitochondrion, membrane; EXPRESSED IN: 25 plant structures; EXPRESSED DURING: 16 growth stages; Has 42 Blast hits to 42 proteins in 11 sp /.../ Archae - 0; Bacteria - 0; Metazoa - 0; Fungi - 0; Plants - 42; Viruses - 0; Other Eukaryotes - 0 (source: NCBI BLink). [Source:TAIR;Acc:AT2G465…
A5SS	AT3G63340	3	-	23393581	23393814	23393763	23393814	23393363	23393438	0.0163075	0.401885	0.967,0.935,0.906	1.0,0.975,1.0	-0.056		Protein phosphatase 2C family protein [Source:TAIR;Acc:AT3G63340]
A5SS	AT2G44650	2	-	18420155	18420323	18420265	18420323	18419941	18420007	0.0164265	0.404114	0.591,1.0,0.366	0.366,0.464,0.188	0.313	CHL-CPN10	chloroplast chaperonin 10 [Source:TAIR;Acc:AT2G44650]
A5SS	AT2G35060	2	-	14778664	14778870	14778749	14778870	14778034	14778202	0.0165031	0.404596	0.094,0.146,0.08	0.154,0.242,0.223	-0.1	POT11	Potassium transporter 11 [Source:UniProtKB/Swiss-Prot;Acc:O64769]
A5SS	AT5G48000	5	-	19447121	19447280	19447201	19447280	19446761	19447004	0.0170057	0.41477	1.0,1.0,0.076	1.0,1.0,1.0	-0.308	CYP708A2	Cytochrome P450 708A2 [Source:UniProtKB/Swiss-Prot;Acc:Q8L7D5]
A5SS	AT1G73177	1	-	27517714	27517854	27517799	27517854	27517276	27517388	0.017051	0.415161	0.0,0.0,0.044	0.0,0.02,0.242	-0.073	BNS	bonsai [Source:TAIR;Acc:AT1G73177]
A5SS	AT5G52100	5	+	21170941	21171027	21170941	21171016	21171157	21171274	0.0171341	0.415759	0.322,0.316,0.345	0.406,0.401,0.445	-0.09	DAPB3	Putative 4-hydroxy-tetrahydrodipicolinate reductase 3, chloroplastic [Source:UniProtKB/Swiss-Prot;Acc:Q9FJ82]
A5SS	AT3G54120	3	-	20041780	20041955	20041929	20041955	20041504	20041716	0.0171715	0.415833	1.0,0.9,1.0	0.927,1.0,0.778	0.065	RTNLB12	Reticulon-like protein B12 [Source:UniProtKB/Swiss-Prot;Acc:Q9M392]
A5SS	AT3G26900	3	-	9912208	9912382	9912313	9912382	9911872	9912207	0.0176927	0.424954	0.162,0.137,0.124	0.186,0.282,0.172	-0.072	SKL1	Probable inactive shikimate kinase like 1, chloroplastic [Source:UniProtKB/Swiss-Prot;Acc:Q9LW20]
A5SS	AT1G34340	1	+	12532575	12532696	12532575	12532661	12532779	12532828	0.0180218	0.4314	0.144,0.196,0.136	0.065,0.05,0.127	0.078		alpha/beta-Hydrolases superfamily protein [Source:TAIR;Acc:AT1G34340]
A5SS	AT5G46470	5	+	18848582	18848803	18848582	18848632	18849198	18849741	0.0182479	0.435342	0.419,0.362,0.439	0.2,0.333,0.312	0.125	RPS6	Disease resistance protein RPS6 [Source:UniProtKB/Swiss-Prot;Acc:F4KHH8]
A5SS	AT4G23910	4	+	12426559	12426729	12426559	12426711	12427054	12427124	0.0185881	0.441234	0.708,0.738,0.716	0.781,0.813,0.818	-0.083		unknown protein; BEST Arabidopsis thaliana protein match is: unknown protein (TAIR:AT4G10970.4); Has 52 Blast hits to 52 proteins in 12 species: Archae - 0; Bacteria - 0; Metazoa - 0; Fungi - 0; Plants - 52; Viruses - 0; Other Eukaryotes - 0 (source /.../ BLink). [Source:TAIR;Acc:AT4G23910]
A5SS	AT5G37590	5	-	14932097	14932200	14932101	14932200	14931814	14932002	0.0185874	0.441234	0.0,0.103,0.157	0.028,0.0,0.0	0.077		Tetratricopeptide repeat (TPR)-like superfamily protein [Source:TAIR;Acc:AT5G37590]
A5SS	AT1G04080	1	+	1054484	1054569	1054484	1054532	1054662	1054806	0.0187508	0.443613	0.89,0.617,1.0	0.636,0.628,0.836	0.136	PRP39	Tetratricopeptide repeat (TPR)-like superfamily protein [Source:TAIR;Acc:AT1G04080]
A5SS	AT2G20980	2	-	9012515	9012559	9012525	9012559	9012395	9012442	0.0189316	0.445662	0.0,0.0,0.0	0.386,0.0,0.0	-0.129	MCM10	minichromosome maintenance 10 [Source:TAIR;Acc:AT2G20980]
A5SS	AT2G37290	2	-	15661288	15661685	15661610	15661685	15661139	15661209	0.0190959	0.448042	0.6,0.333,0.167	1.0,0.5,0.6	-0.333		Ypt/Rab-GAP domain of gyp1p superfamily protein [Source:TAIR;Acc:AT2G37290]
A5SS	AT2G43490	2	-	18058044	18058196	18058056	18058196	18057838	18057937	0.0190673	0.448042	0.805,0.646,0.756	0.901,0.809,0.823	-0.109		Ypt/Rab-GAP domain of gyp1p superfamily protein [Source:TAIR;Acc:AT2G43490]
A5SS	AT4G26190	4	-	13263490	13263570	13263492	13263570	13263299	13263363	0.0193039	0.452176	0.0,0.498,0.166	0.249,0.713,0.0	-0.099		Haloacid dehalogenase-like hydrolase (HAD) superfamily protein [Source:TAIR;Acc:AT4G26190]
A5SS	AT4G04920	4	+	2499083	2499191	2499083	2499129	2499446	2499537	0.0194428	0.453931	1.0,0.713,0.262	0.68,0.0,0.262	0.344	MED16	Mediator of RNA polymerase II transcription subunit 16 [Source:UniProtKB/Swiss-Prot;Acc:F4JGZ1]
A5SS	AT5G02810	5	-	640131	640202	640155	640202	639813	639993	0.0194396	0.453931	0.831,0.956,0.948	0.839,0.827,0.733	0.112	APRR7	Two-component response regulator-like APRR7 [Source:UniProtKB/Swiss-Prot;Acc:Q93WK5]
A5SS	AT2G21510	2	-	9211067	9211169	9211088	9211169	9210654	9210936	0.0195941	0.456714	0.37,0.181,0.346	0.407,0.799,0.569	-0.293		DNAJ heat shock N-terminal domain-containing protein [Source:TAIR;Acc:AT2G21510]
A5SS	AT5G37500	5	-	14890810	14891003	14890814	14891003	14890672	14890748	0.0201588	0.466036	0.0,0.065,0.0	0.076,0.0,0.263	-0.091	GORK	Potassium channel GORK [Source:UniProtKB/Swiss-Prot;Acc:Q94A76]
A5SS	AT5G61670	5	+	24785123	24785349	24785123	24785258	24785522	24785945	0.020191	0.466036	0.877,0.877,0.781	0.588,0.792,0.792	0.121		Encodes a close homolog of the Cauliflower OR (Orange) protein. The function of OR is to induce the differentiation of proplastids or other noncolored plastids into chromoplasts for carotenoid accumulation. Both proteins contain a Cysteine-rich zi /.../ger domain that is highly specific to DnaJ-like molecular chaperons. [Source:TAIR;Acc:AT5G61670]
A5SS	AT1G45474	1	+	17180296	17180530	17180296	17180439	17180700	17180806	0.020488	0.471357	0.181,0.205,0.256	0.249,0.257,0.305	-0.056	LHCA5	photosystem I light harvesting complex gene 5 [Source:TAIR;Acc:AT1G45474]
A5SS	AT3G27470	3	+	10163048	10163253	10163048	10163170	10163691	10163811	0.0210801	0.481081	0.102,0.083,0.165	0.01,0.06,0.101	0.06		Protein of unknown function (DUF707) [Source:TAIR;Acc:AT3G27470]
A5SS	AT1G26440	1	-	9145285	9145340	9145295	9145340	9144994	9145195	0.0213329	0.484512	0.623,1.0,0.85	1.0,1.0,1.0	-0.176	UPS5	Ureide permease 5 [Source:UniProtKB/Swiss-Prot;Acc:Q93Z75]
A5SS	AT5G20510	5	-	6942390	6942546	6942513	6942546	6941716	6941945	0.0213758	0.484711	0.0,0.0,0.0	0.014,0.117,0.027	-0.053	AL5	PHD finger protein ALFIN-LIKE 5 [Source:UniProtKB/Swiss-Prot;Acc:Q5XEM9]
A5SS	AT2G38330	2	+	16065829	16065943	16065829	16065926	16066024	16066125	0.0214123	0.484764	0.475,0.484,0.255	0.563,0.603,0.575	-0.176	DTX44	MATE efflux family protein 2, chloroplastic [Source:UniProtKB/Swiss-Prot;Acc:Q84K71]
A5SS	AT1G62320	1	-	23043663	23043783	23043669	23043783	23043514	23043595	0.0215345	0.486756	0.659,0.693,1.0	1.0,1.0,0.863	-0.17		ERD (early-responsive to dehydration stress) family protein [Source:TAIR;Acc:AT1G62320]
A5SS	AT1G56170	1	+	21024763	21025011	21024763	21024796	21025104	21025883	0.0216984	0.488548	0.053,0.073,0.053	0.222,0.026,0.241	-0.103	NFYC2	Nuclear transcription factor Y subunit C-2 [Source:UniProtKB/Swiss-Prot;Acc:Q8LCG7]
A5SS	AT1G62540	1	+	23154452	23154588	23154452	23154534	23154663	23154792	0.0216737	0.488548	0.898,1.0,1.0	1.0,0.297,1.0	0.2	FMOGS-OX2	Flavin-containing monooxygenase FMO GS-OX2 [Source:UniProtKB/Swiss-Prot;Acc:Q94K43]
A5SS	AT1G49300	1	+	18236901	18237231	18236901	18237015	18237287	18237543	0.021788	0.489298	0.934,0.915,0.889	0.799,0.829,0.91	0.067	RABG3E	Ras-related protein RABG3e [Source:UniProtKB/Swiss-Prot;Acc:Q9XI98]
A5SS	AT1G01760	1	-	277716	277863	277734	277863	277492	277606	0.0219521	0.491498	1.0,0.854,1.0	0.767,0.818,1.0	0.09		adenosine deaminases;RNA binding;RNA binding;adenosine deaminases [Source:TAIR;Acc:AT1G01760]
A5SS	AT4G31720	4	-	15355597	15355740	15355682	15355740	15355446	15355515	0.0220333	0.491765	0.826,0.819,0.814	0.866,0.912,0.906	-0.075	TAF10	Transcription initiation factor TFIID subunit 10 [Source:UniProtKB/Swiss-Prot;Acc:O04173]
A5SS	AT1G11910	1	-	4020745	4020983	4020870	4020983	4019526	4019879	0.0222798	0.495707	1.0,1.0,1.0	0.522,1.0,1.0	0.159	APA1	Aspartic proteinase A1 [Source:UniProtKB/Swiss-Prot;Acc:O65390]
A5SS	AT5G10940	5	-	3452075	3452190	3452084	3452190	3451435	3451575	0.022388	0.49694	0.179,0.156,0.111	0.076,0.118,0.058	0.065		transducin family protein / WD-40 repeat family protein [Source:TAIR;Acc:AT5G10940]
A5SS	AT3G61530	3	-	22772537	22772736	22772545	22772736	22772298	22772445	0.0233789	0.516116	0.074,0.0,0.074	0.12,0.227,0.16	-0.12	KPHMT2	3-methyl-2-oxobutanoate hydroxymethyltransferase 2, mitochondrial [Source:UniProtKB/Swiss-Prot;Acc:Q9M315]
A5SS	AT3G57570	3	+	21313967	21314070	21313967	21314066	21314168	21314267	0.0234152	0.516116	0.951,0.887,0.956	0.821,0.851,0.884	0.079		ARM repeat superfamily protein [Source:TAIR;Acc:AT3G57570]
A5SS	AT5G50330	5	-	20486912	20487048	20486962	20487048	20486648	20486757	0.0236402	0.519462	0.429,0.858,0.765	0.871,1.0,0.84	-0.22		Protein kinase superfamily protein [Source:TAIR;Acc:AT5G50330]
A5SS	AT4G37070	4	-	17465084	17465330	17465129	17465330	17464784	17465012	0.0239796	0.526107	1.0,0.436,0.0	0.26,0.279,0.317	0.193	PLP1	Patatin-like protein 1 [Source:UniProtKB/Swiss-Prot;Acc:O23179]
A5SS	AT3G63340	3	-	23395808	23395980	23395910	23395980	23395567	23395709	0.0243466	0.531861	0.373,0.166,0.13	0.443,1.0,0.641	-0.472		Protein phosphatase 2C family protein [Source:TAIR;Acc:AT3G63340]
A5SS	AT2G44650	2	-	18420127	18420324	18420265	18420324	18419941	18420007	0.0243531	0.531861	0.566,1.0,0.61	0.439,0.61,0.385	0.247	CHL-CPN10	chloroplast chaperonin 10 [Source:TAIR;Acc:AT2G44650]
A5SS	AT4G30510	4	-	14906310	14906423	14906315	14906423	14906078	14906198	0.0246953	0.535797	0.878,0.958,0.946	0.925,0.755,0.869	0.078	ATATG18B	homolog of yeast autophagy 18 (ATG18) B [Source:TAIR;Acc:AT4G30510]
A5SS	AT5G18650	5	+	6219413	6219466	6219413	6219464	6219566	6219649	0.0247988	0.535797	0.498,1.0,0.284	0.799,0.874,1.0	-0.297		CHY-type/CTCHY-type/RING-type Zinc finger protein [Source:TAIR;Acc:AT5G18650]
A5SS	AT3G26650	3	+	9795333	9795518	9795333	9795440	9795625	9795930	0.0247861	0.535797	0.798,1.0,0.859	0.865,1.0,1.0	-0.069	GAPA1	Glyceraldehyde-3-phosphate dehydrogenase GAPA1, chloroplastic [Source:UniProtKB/Swiss-Prot;Acc:P25856]
A5SS	AT1G76050	1	+	28541840	28542034	28541840	28542011	28542153	28542232	0.0246337	0.535797	0.098,1.0,0.303	0.148,0.303,0.0	0.317		RNA pseudouridine synthase 2, chloroplastic [Source:UniProtKB/Swiss-Prot;Acc:Q3ECD0]
A5SS	AT5G27970	5	+	10006386	10006504	10006386	10006496	10006605	10006661	0.0250102	0.53791	0.87,0.838,0.855	0.572,0.908,0.389	0.231		ARM repeat superfamily protein [Source:TAIR;Acc:AT5G27970]
A5SS	AT1G63640	1	-	23595604	23595821	23595644	23595821	23595018	23595188	0.0249796	0.53791	1.0,1.0,0.874	0.973,0.813,0.873	0.072		P-loop nucleoside triphosphate hydrolases superfamily protein with CH (Calponin Homology) domain [Source:TAIR;Acc:AT1G63640]
A5SS	AT4G39910	4	-	18513369	18513611	18513498	18513611	18513005	18513104	0.0249891	0.53791	0.811,1.0,1.0	0.729,0.35,1.0	0.244	UBP3	Ubiquitin carboxyl-terminal hydrolase 3 [Source:UniProtKB/Swiss-Prot;Acc:O24454]
A5SS	AT4G10730	4	-	6613145	6613280	6613172	6613280	6613015	6613060	0.0253563	0.543706	1.0,1.0,0.773	1.0,0.749,0.719	0.102		Protein kinase superfamily protein [Source:TAIR;Acc:AT4G10730]
A5SS	AT4G10730	4	-	6613168	6613280	6613172	6613280	6613015	6613060	0.0258772	0.553203	1.0,1.0,0.774	1.0,0.774,0.662	0.113		Protein kinase superfamily protein [Source:TAIR;Acc:AT4G10730]
A5SS	AT1G51430	1	+	19068710	19068904	19068710	19068773	19068991	19069036	0.0261985	0.558389	0.104,0.175,0.123	0.069,0.119,0.059	0.052		unknown protein; BEST Arabidopsis thaliana protein match is: unknown protein (TAIR:AT3G28370.1); Has 13 Blast hits to 13 proteins in 4 species: Archae - 0; Bacteria - 0; Metazoa - 0; Fungi - 0; Plants - 13; Viruses - 0; Other Eukaryotes - 0 (source: /.../BLink). [Source:TAIR;Acc:AT1G51430]
A5SS	AT2G43500	2	+	18062530	18062599	18062530	18062595	18062693	18063659	0.0261751	0.558389	0.197,0.329,0.495	0.746,0.855,0.395	-0.325	NLP8	Protein NLP8 [Source:UniProtKB/Swiss-Prot;Acc:O22864]
A5SS	AT1G55870	1	+	20896738	20896857	20896738	20896852	20897052	20897179	0.0265542	0.562416	0.0,0.163,0.127	0.0,0.0,0.0	0.097	PARN	Poly(A)-specific ribonuclease PARN [Source:UniProtKB/Swiss-Prot;Acc:Q9LG26]
A5SS	AT5G63080	5	-	25301580	25301743	25301633	25301743	25301365	25301483	0.0265855	0.562416	1.0,0.973,0.901	0.965,1.0,0.724	0.062		2-oxoglutarate (2OG) and Fe(II)-dependent oxygenase superfamily protein [Source:TAIR;Acc:AT5G63080]
A5SS	AT3G08000	3	-	2555683	2555929	2555690	2555929	2555541	2555610	0.0272392	0.573679	0.243,0.325,0.0	0.325,1.0,0.0	-0.252		RNA-binding (RRM/RBD/RNP motifs) family protein [Source:TAIR;Acc:AT3G08000]
A5SS	AT3G59390	3	+	21948073	21948318	21948073	21948172	21948341	21948372	0.0272142	0.573679	0.603,1.0,0.202	0.266,0.0,0.275	0.421		unknown protein; FUNCTIONS IN: molecular_function unknown; INVOLVED IN: biological_process unknown; LOCATED IN: endomembrane system; EXPRESSED IN: 22 plant structures; EXPRESSED DURING: 13 growth stages; CONTAINS InterPro DOMAIN/s: Protein of unknow /.../tion DUF2054 (InterPro:IPR019352); Has 35333 Blast hits to 34131 proteins in 2444 species: Archae - 798; Bacteria - 22429; Metazoa - 974; Fungi …
A5SS	AT5G20720	5	+	7014668	7014916	7014668	7014894	7015009	7015188	0.0277521	0.581892	1.0,0.0,1.0	1.0,1.0,1.0	-0.333	CPN21	20 kDa chaperonin, chloroplastic [Source:UniProtKB/Swiss-Prot;Acc:O65282]
A5SS	AT5G01920	5	+	359783	359959	359783	359950	360041	360446	0.0279985	0.58533	0.717,0.81,1.0	1.0,1.0,1.0	-0.158	STN8	Serine/threonine-protein kinase STN8, chloroplastic [Source:UniProtKB/Swiss-Prot;Acc:Q9LZV4]
A5SS	AT5G06120	5	+	1844736	1844824	1844736	1844766	1845291	1845549	0.0280934	0.58645	1.0,0.913,0.503	1.0,0.888,0.951	-0.141		ARM repeat superfamily protein [Source:TAIR;Acc:AT5G06120]
A5SS	AT5G45428	5	+	18408711	18408929	18408711	18408919	18409008	18409207	0.0285853	0.594096	0.916,0.895,0.947	0.925,1.0,1.0	-0.056	CPuORF24	conserved peptide upstream open reading frame 24 [Source:TAIR;Acc:AT5G45428]
A5SS	AT1G31850	1	+	11430848	11431033	11430848	11431008	11431135	11431443	0.0286605	0.59479	0.147,0.0,0.106	0.0,0.0,0.056	0.066		Probable methyltransferase PMT20 [Source:UniProtKB/Swiss-Prot;Acc:Q9C6S7]
A5SS	AT5G48000	5	-	19447090	19447280	19447121	19447280	19446761	19447008	0.0290734	0.601598	0.882,0.858,0.818	0.909,0.9,0.909	-0.053	CYP708A2	Cytochrome P450 708A2 [Source:UniProtKB/Swiss-Prot;Acc:Q8L7D5]
A5SS	AT1G09280	1	-	2999022	2999243	2999027	2999243	2998099	2998915	0.0291921	0.603176	0.068,0.014,0.089	0.129,0.098,0.096	-0.051	STR6	Rhodanese-like domain-containing protein 6 [Source:UniProtKB/Swiss-Prot;Acc:Q94AC1]
A5SS	AT5G22860	5	-	7639851	7639981	7639910	7639981	7639762	7639812	0.0292363	0.603211	0.077,0.029,0.042	0.102,0.026,0.198	-0.059		Serine carboxypeptidase S28 family protein [Source:TAIR;Acc:AT5G22860]
A5SS	AT4G00290	4	-	124270	124548	124385	124548	123965	124066	0.0294355	0.606128	0.922,0.944,0.932	0.826,0.911,0.864	0.066	MSL1	Mechanosensitive ion channel protein 1, mitochondrial [Source:UniProtKB/Swiss-Prot;Acc:Q8VZL4]
A5SS	AT4G29790	4	+	14588575	14588650	14588575	14588647	14588827	14588898	0.0302877	0.618749	0.651,0.577,0.616	0.755,0.638,0.798	-0.116		unknown protein; BEST Arabidopsis thaliana protein match is: unknown protein (TAIR:AT2G19390.1); Has 538 Blast hits to 357 proteins in 124 species: Archae - 0; Bacteria - 74; Metazoa - 109; Fungi - 58; Plants - 105; Viruses - 2; Other Eukaryotes - 1 /.../urce: NCBI BLink). [Source:TAIR;Acc:AT4G29790]
A5SS	AT2G30600	2	+	13036995	13037284	13036995	13037228	13037381	13038219	0.0302945	0.618749	0.0,1.0,1.0	0.868,1.0,1.0	-0.289		BTB/POZ domain-containing protein At2g30600 [Source:UniProtKB/Swiss-Prot;Acc:Q8LEV3]
A5SS	AT3G55080	3	-	20412261	20412399	20412265	20412399	20411945	20412034	0.030271	0.618749	0.037,0.0,0.117	0.168,0.095,0.114	-0.074		SET domain-containing protein [Source:TAIR;Acc:AT3G55080]
A5SS	AT4G38510	4	-	18014959	18015173	18015065	18015173	18014734	18014796	0.0305286	0.621742	0.25,0.282,0.256	0.31,0.375,0.354	-0.084	VHA-B2	V-type proton ATPase subunit B2 [Source:UniProtKB/Swiss-Prot;Acc:Q9SZN1]
A5SS	AT5G02810	5	-	640084	640202	640155	640202	639813	639993	0.0317897	0.640078	0.911,0.97,0.965	0.891,0.902,0.855	0.066	APRR7	Two-component response regulator-like APRR7 [Source:UniProtKB/Swiss-Prot;Acc:Q93WK5]
A5SS	AT1G09910	1	-	3224347	3224541	3224378	3224541	3223733	3223831	0.0318505	0.640393	0.0,0.0,0.0	0.131,0.0,0.027	-0.053		Rhamnogalacturonate lyase family protein [Source:TAIR;Acc:AT1G09910]
A5SS	AT1G16780	1	-	5744111	5744214	5744138	5744214	5743770	5743829	0.0319775	0.641131	1.0,0.882,0.963	0.909,0.87,0.887	0.06	VHP2;2	Inorganic H pyrophosphatase family protein [Source:TAIR;Acc:AT1G16780]
A5SS	AT2G31130	2	-	13266459	13266560	13266474	13266560	13265521	13265570	0.0323536	0.645076	0.969,1.0,1.0	1.0,0.875,0.838	0.085		unknown protein; Has 116 Blast hits to 113 proteins in 44 species: Archae - 0; Bacteria - 3; Metazoa - 21; Fungi - 2; Plants - 40; Viruses - 0; Other Eukaryotes - 50 (source: NCBI BLink). [Source:TAIR;Acc:AT2G31130]
A5SS	AT2G45690	2	-	18825154	18825228	18825170	18825228	18824660	18824880	0.0323145	0.645076	0.092,0.102,0.034	0.089,0.14,0.232	-0.078	PEX16	Peroxisome biogenesis protein 16 [Source:UniProtKB/Swiss-Prot;Acc:Q8S8S1]
A5SS	AT4G31480	4	+	15263795	15263909	15263795	15263833	15264133	15266190	0.0331729	0.654922	0.571,0.379,0.222	0.104,0.225,0.333	0.17		Coatomer subunit beta-1 [Source:UniProtKB/Swiss-Prot;Acc:Q9SV21]
A5SS	AT3G26950	3	-	9942826	9942990	9942836	9942990	9942498	9942718	0.0333144	0.656803	0.439,0.312,0.186	0.426,0.386,0.538	-0.138		unknown protein; Has 27 Blast hits to 27 proteins in 8 species: Archae - 0; Bacteria - 0; Metazoa - 0; Fungi - 0; Plants - 27; Viruses - 0; Other Eukaryotes - 0 (source: NCBI BLink). [Source:TAIR;Acc:AT3G26950]
A5SS	AT4G35785	4	-	16953724	16953890	16953853	16953890	16953522	16953592	0.0334744	0.659042	0.894,0.936,0.942	0.904,0.79,0.882	0.065		RNA-binding (RRM/RBD/RNP motifs) family protein [Source:TAIR;Acc:AT4G35785]
A5SS	AT5G08470	5	+	2736525	2736625	2736525	2736621	2736821	2737292	0.0340063	0.665819	0.827,0.853,0.857	0.841,0.737,0.703	0.085	PEX1	Peroxisome biogenesis protein 1 [Source:UniProtKB/Swiss-Prot;Acc:Q9FNP1]
A5SS	AT5G13950	5	-	4499125	4499246	4499176	4499246	4498768	4498918	0.0350564	0.679935	0.692,0.375,0.428	0.6,1.0,0.789	-0.298		unknown protein; BEST Arabidopsis thaliana protein match is: unknown protein (TAIR:AT1G02290.1); Has 147 Blast hits to 145 proteins in 44 species: Archae - 0; Bacteria - 2; Metazoa - 56; Fungi - 6; Plants - 81; Viruses - 0; Other Eukaryotes - 2 (sou /.../CBI BLink). [Source:TAIR;Acc:AT5G13950]
A5SS	AT5G09880	5	-	3083738	3083984	3083928	3083984	3083096	3083329	0.0350786	0.679935	0.188,0.225,0.162	0.348,0.161,0.406	-0.113		Splicing factor, CC1-like [Source:TAIR;Acc:AT5G09880]
A5SS	AT5G52220	5	-	21207242	21207448	21207261	21207448	21207096	21207175	0.0353892	0.682541	0.0,0.0,1.0	0.0,0.0,0.0	0.333		CONTAINS InterPro DOMAIN/s: Chromosome transmission fidelity protein 8 (InterPro:IPR018607); Has 127 Blast hits to 127 proteins in 63 species: Archae - 0; Bacteria - 0; Metazoa - 70; Fungi - 17; Plants - 31; Viruses - 0; Other Eukaryotes - 9 (source /.../ BLink). [Source:TAIR;Acc:AT5G52220]
A5SS	AT1G34150	1	+	12437809	12437957	12437809	12437950	12438333	12438451	0.0354519	0.682551	0.194,0.0,0.0	0.59,0.0,1.0	-0.465		Pseudouridine synthase family protein [Source:TAIR;Acc:AT1G34150]
A5SS	AT5G08710	5	-	2837081	2837177	2837085	2837177	2836908	2836987	0.0358069	0.687794	0.0,0.296,0.0	0.329,0.0,0.359	-0.131		Regulator of chromosome condensation (RCC1) family protein [Source:TAIR;Acc:AT5G08710]
A5SS	AT3G50430	3	+	18715758	18715829	18715758	18715820	18715902	18716008	0.036778	0.701714	0.226,0.289,0.229	0.174,0.073,0.125	0.124		unknown protein; Has 54 Blast hits to 54 proteins in 22 species: Archae - 0; Bacteria - 0; Metazoa - 29; Fungi - 0; Plants - 24; Viruses - 0; Other Eukaryotes - 1 (source: NCBI BLink). [Source:TAIR;Acc:AT3G50430]
A5SS	AT2G14255	2	+	6038202	6038366	6038202	6038340	6039083	6039222	0.036885	0.701853	0.4,0.376,0.353	0.236,0.31,0.283	0.1	PAT23	Probable protein S-acyltransferase 23 [Source:UniProtKB/Swiss-Prot;Acc:Q3EC11]
A5SS	AT5G58940	5	+	23799528	23799711	23799528	23799697	23799841	23799931	0.0370713	0.704455	0.059,0.111,0.03	0.035,0.18,0.215	-0.077	CRCK1	Calmodulin-binding receptor-like cytoplasmic kinase 1 [Source:UniProtKB/Swiss-Prot;Acc:Q9FIL7]
A5SS	AT1G51690	1	+	19167361	19167568	19167361	19167565	19167960	19168052	0.0372814	0.707499	0.723,0.627,0.626	0.778,0.706,0.716	-0.075	PP2AB1	Serine/threonine protein phosphatase 2A 55 kDa regulatory subunit B alpha isoform [Source:UniProtKB/Swiss-Prot;Acc:Q38821]
A5SS	AT1G05030	1	-	1439478	1439658	1439490	1439658	1439157	1439304	0.0376758	0.712932	0.0,0.0,0.094	0.358,0.078,0.078	-0.14		Probable plastidic glucose transporter 1 [Source:UniProtKB/Swiss-Prot;Acc:Q0WVE9]
A5SS	AT5G10690	5	-	3376237	3376421	3376250	3376421	3376075	3376144	0.0379083	0.71557	0.581,0.41,0.649	0.27,1.0,1.0	-0.21	CBSPPR1	Pentatricopeptide repeat-containing protein At5g10690 [Source:UniProtKB/Swiss-Prot;Acc:Q8VYD6]
A5SS	AT5G02680	5	+	605724	605966	605724	605914	606044	606110	0.0382255	0.717826	0.672,1.0,0.764	0.516,0.651,0.691	0.193		LOCATED IN: endomembrane system; EXPRESSED IN: 21 plant structures; EXPRESSED DURING: 13 growth stages; BEST Arabidopsis thaliana protein match is: methionine--tRNA ligase, putative / methionyl-tRNA synthetase, putative / MetRS, putative (TAIR:AT4G1 /.../); Has 252 Blast hits to 252 proteins in 89 species: Archae - 0; Bacteria - 71; Metazoa - 93; Fungi - 0; Plants - 74; Viruses - 0; Other Eukaryo…
A5SS	AT3G29970	3	+	11745210	11745389	11745210	11745322	11745994	11746083	0.0382301	0.717826	0.0,1.0,0.0	0.148,0.409,0.257	0.062		B12D protein [Source:TAIR;Acc:AT3G29970]
A5SS	AT2G36060	2	-	15143224	15143351	15143228	15143351	15142676	15143152	0.0390225	0.727891	0.766,0.45,0.065	1.0,0.627,0.462	-0.269	UEV1C	Ubiquitin-conjugating enzyme E2 variant 1C [Source:UniProtKB/Swiss-Prot;Acc:Q9SJ44]
A5SS	AT4G32660	4	+	15756992	15757039	15756992	15757019	15757111	15757265	0.0391812	0.729892	0.036,0.104,0.033	0.043,0.115,0.169	-0.051	AFC3	Serine/threonine-protein kinase AFC3 [Source:UniProtKB/Swiss-Prot;Acc:P51568]
A5SS	AT1G32370	1	+	11677832	11677925	11677832	11677923	11678023	11678449	0.0392694	0.730575	0.427,0.398,0.465	0.387,0.0,0.249	0.218	TOM2B	Tobamovirus multiplication protein 2B [Source:UniProtKB/Swiss-Prot;Acc:Q8H960]
A5SS	AT1G02990	1	-	682233	682403	682277	682403	681395	681921	0.0394289	0.731624	1.0,1.0,0.725	1.0,1.0,1.0	-0.092		BEST Arabidopsis thaliana protein match is: CW-type Zinc Finger (TAIR:AT3G62900.1); Has 5847 Blast hits to 4410 proteins in 438 species: Archae - 17; Bacteria - 452; Metazoa - 2463; Fungi - 354; Plants - 306; Viruses - 11; Other Eukaryotes - 2244 (s /.../ NCBI BLink). [Source:TAIR;Acc:AT1G02990]
A5SS	AT5G61960	5	-	24881770	24881919	24881780	24881919	24881538	24881621	0.0397827	0.736265	1.0,1.0,1.0	1.0,0.569,1.0	0.144	ML1	Protein MEI2-like 1 [Source:UniProtKB/Swiss-Prot;Acc:Q8W4I9]
A5SS	AT1G13460	1	+	4615812	4616049	4615812	4615978	4616427	4617667	0.0405182	0.747471	0.157,0.024,0.191	0.306,0.122,0.185	-0.08	B'THETA	Serine/threonine protein phosphatase 2A 57 kDa regulatory subunit B' theta isoform [Source:UniProtKB/Swiss-Prot;Acc:Q8LF36]
A5SS	AT5G63200	5	+	25351028	25351239	25351028	25351210	25351735	25352020	0.0406296	0.748038	0.284,0.387,0.286	0.49,0.469,0.354	-0.119		tetratricopeptide repeat (TPR)-containing protein [Source:TAIR;Acc:AT5G63200]
A5SS	AT1G60650	1	+	22341163	22341219	22341163	22341188	22341305	22341814	0.0408288	0.750732	1.0,0.454,0.0	0.0,1.0,0.294	0.053	RZ1B	Glycine-rich RNA-binding protein RZ1B [Source:UniProtKB/Swiss-Prot;Acc:O22703]
A5SS	AT1G68310	1	+	25599490	25599673	25599490	25599530	25599800	25599953	0.0421489	0.767357	0.085,0.0,0.0	0.093,0.068,0.146	-0.074	AE7	MIP18 family protein At1g68310 [Source:UniProtKB/Swiss-Prot;Acc:Q9C9G6]
A5SS	AT5G09410	5	+	2923507	2923601	2923507	2923572	2923708	2923995	0.0421271	0.767357	0.102,0.08,0.099	0.178,0.128,0.151	-0.059	CMTA1	Calmodulin-binding transcription activator 1 [Source:UniProtKB/Swiss-Prot;Acc:Q9FY74]
A5SS	AT4G35785	4	-	16953703	16953890	16953724	16953890	16953522	16953592	0.0422494	0.767357	0.37,0.507,0.306	0.66,0.577,0.502	-0.185		RNA-binding (RRM/RBD/RNP motifs) family protein [Source:TAIR;Acc:AT4G35785]
A5SS	AT1G12230	1	+	4148938	4148975	4148938	4148953	4149079	4149155	0.0426486	0.77219	0.305,0.369,0.637	1.0,0.86,0.467	-0.339		Aldolase superfamily protein [Source:TAIR;Acc:AT1G12230]
A5SS	AT2G35880	2	-	15065517	15065593	15065572	15065593	15065088	15065406	0.0427779	0.773545	1.0,1.0,1.0	0.688,0.268,1.0	0.348		TPX2 (targeting protein for Xklp2) protein family [Source:TAIR;Acc:AT2G35880]
A5SS	AT5G17440	5	+	5752433	5752673	5752433	5752492	5752795	5752877	0.0433111	0.781195	0.389,0.418,0.262	0.657,0.47,0.412	-0.157		LUC7 related protein [Source:TAIR;Acc:AT5G17440]
A5SS	AT5G02600	5	-	585100	585846	585716	585846	584161	584489	0.0439106	0.790002	0.727,1.0,0.905	0.769,0.825,0.627	0.137	NAKR1	Heavy metal transport/detoxification superfamily protein [Source:TAIR;Acc:AT5G02600]
A5SS	AT4G38510	4	-	18014883	18015001	18014959	18015001	18014734	18014796	0.0439727	0.790116	0.223,0.114,0.259	0.136,0.089,0.132	0.08	VHA-B2	V-type proton ATPase subunit B2 [Source:UniProtKB/Swiss-Prot;Acc:Q9SZN1]
A5SS	AT3G11890	3	+	3755541	3755708	3755541	3755600	3756019	3757775	0.0444293	0.795302	0.074,0.169,0.04	0.0,0.055,0.064	0.055		Sterile alpha motif (SAM) domain-containing protein [Source:TAIR;Acc:AT3G11890]
A5SS	AT1G76050	1	+	28541812	28542015	28541812	28542011	28542153	28542232	0.0445881	0.797139	0.891,1.0,0.966	0.92,0.926,0.841	0.057		RNA pseudouridine synthase 2, chloroplastic [Source:UniProtKB/Swiss-Prot;Acc:Q3ECD0]
A5SS	AT4G19550	4	-	10660504	10660753	10660685	10660753	10660255	10660336	0.0448063	0.800033	0.282,0.227,0.25	0.22,0.622,0.6	-0.228		zinc ion binding;transcription regulators [Source:TAIR;Acc:AT4G19550]
A5SS	AT4G10100	4	+	6308682	6308849	6308682	6308810	6309084	6309546	0.0450593	0.803539	0.911,0.864,0.845	0.968,0.965,0.874	-0.062	CNX7	Molybdopterin synthase sulfur carrier subunit [Source:UniProtKB/Swiss-Prot;Acc:Q9S7A3]
A5SS	AT4G38270	4	+	17939038	17939176	17939038	17939168	17939441	17939582	0.0455104	0.808536	0.908,0.865,0.819	0.716,0.77,0.8	0.102	GAUT3	Probable galacturonosyltransferase 3 [Source:UniProtKB/Swiss-Prot;Acc:Q0WQD2]
A5SS	AT5G17230	5	-	5662329	5662466	5662455	5662466	5661642	5662239	0.0459206	0.811759	0.189,0.111,0.035	0.052,0.272,0.29	-0.093	PSY1	Phytoene synthase, chloroplastic [Source:UniProtKB/Swiss-Prot;Acc:P37271]
A5SS	AT4G35785	4	-	16953708	16953890	16953853	16953890	16953522	16953592	0.0459126	0.811759	0.883,0.932,0.929	0.902,0.771,0.869	0.067		RNA-binding (RRM/RBD/RNP motifs) family protein [Source:TAIR;Acc:AT4G35785]
A5SS	AT2G02410	2	+	632633	632904	632633	632874	633208	633284	0.0461137	0.814159	0.295,0.346,0.456	0.236,0.324,0.044	0.164		unknown protein; CONTAINS InterPro DOMAIN/s: Protein of unknown function DUF901 (InterPro:IPR010298); Has 1151 Blast hits to 1151 proteins in 597 species: Archae - 0; Bacteria - 1105; Metazoa - 0; Fungi - 0; Plants - 42; Viruses - 0; Other Eukaryote /.../(source: NCBI BLink). [Source:TAIR;Acc:AT2G02410]
A5SS	AT5G17230	5	-	5662325	5662466	5662455	5662466	5661642	5662239	0.0461898	0.81449	0.187,0.11,0.034	0.034,0.303,0.287	-0.098	PSY1	Phytoene synthase, chloroplastic [Source:UniProtKB/Swiss-Prot;Acc:P37271]
A5SS	AT2G23985	2	+	10205461	10205710	10205461	10205693	10206103	10206407	0.0463315	0.815542	0.501,0.5,0.516	0.599,0.625,0.644	-0.117		unknown protein; Has 2 Blast hits to 2 proteins in 1 species: Archae - 0; Bacteria - 0; Metazoa - 0; Fungi - 0; Plants - 2; Viruses - 0; Other Eukaryotes - 0 (source: NCBI BLink). [Source:TAIR;Acc:AT2G23985]
A5SS	AT5G37370	5	-	14815387	14815545	14815437	14815545	14815206	14815283	0.0466545	0.818297	1.0,0.907,1.0	0.849,0.734,1.0	0.108	ATSRL1	PRP38 family protein [Source:TAIR;Acc:AT5G37370]
A5SS	AT4G35785	4	-	16953701	16953890	16953853	16953890	16953522	16953592	0.046694	0.818297	0.881,0.933,0.929	0.901,0.776,0.868	0.066		RNA-binding (RRM/RBD/RNP motifs) family protein [Source:TAIR;Acc:AT4G35785]
A5SS	AT1G32370	1	+	11677832	11678007	11677832	11677923	11678023	11678449	0.046777	0.818326	0.743,0.6,0.546	0.512,0.391,0.44	0.182	TOM2B	Tobamovirus multiplication protein 2B [Source:UniProtKB/Swiss-Prot;Acc:Q8H960]
A5SS	AT1G17110	1	-	5848199	5848339	5848211	5848339	5848030	5848119	0.0468109	0.818326	0.258,0.296,0.237	0.369,0.284,0.398	-0.087	UBP15	Ubiquitin carboxyl-terminal hydrolase 15 [Source:UniProtKB/Swiss-Prot;Acc:Q9FPS9]
A5SS	AT2G41020	2	+	17117659	17117711	17117659	17117694	17117860	17117942	0.0470878	0.819507	0.0,0.083,0.192	0.021,0.021,0.039	0.065		WW domain-containing protein [Source:TAIR;Acc:AT2G41020]
A5SS	AT5G05000	5	-	1475984	1476040	1475994	1476040	1475670	1475788	0.0471094	0.819507	0.485,0.386,0.623	1.0,0.191,1.0	-0.232	TOC34	Translocase of chloroplast 34, chloroplastic [Source:UniProtKB/Swiss-Prot;Acc:Q38906]
A5SS	AT4G03090	4	-	1367825	1367892	1367831	1367892	1367185	1367656	0.047262	0.820152	0.804,0.948,1.0	0.871,0.683,1.0	0.066		sequence-specific DNA binding;sequence-specific DNA binding transcription factors [Source:TAIR;Acc:AT4G03090]
A5SS	AT5G15070	5	+	4876827	4876984	4876827	4876966	4877138	4877198	0.0486745	0.838513	0.31,1.0,0.166	0.0,0.121,0.31	0.348		Phosphoglycerate mutase-like family protein [Source:TAIR;Acc:AT5G15070]
A5SS	AT2G02770	2	-	777400	777576	777463	777576	777174	777318	0.0490281	0.84358	0.821,0.919,1.0	0.876,0.864,0.708	0.097		4'-phosphopantetheinyl transferase superfamily [Source:TAIR;Acc:AT2G02770]
A5SS	AT5G18650	5	+	6219413	6219468	6219413	6219464	6219566	6219649	0.0495111	0.848088	0.696,1.0,0.282	0.746,0.887,1.0	-0.218		CHY-type/CTCHY-type/RING-type Zinc finger protein [Source:TAIR;Acc:AT5G18650]
AS Type	GeneID	chr	strand	exonStart_0base	exonEnd	upstreamES	upstreamEE	downstreamES	downstreamEE	PValue	FDR	IncLevel1	IncLevel2	IncLevelDifference	Name	description
ES	AT3G59350	3	+	21932684	21932971	21932524	21932648	21933307	21933500	6.66134e-16	4.99401e-12	0.414,0.407,0.321	0.753,0.703,0.713	-0.342	PTI13	PTI1-like tyrosine-protein kinase 3 [Source:UniProtKB/Swiss-Prot;Acc:B9DFG5]
ES	AT2G26980	2	-	11516426	11516480	11516082	11516207	11516696	11516786	1.16129e-13	2.90207e-10	0.219,0.188,0.175	0.388,0.356,0.333	-0.165	CIPK3	CBL-interacting serine/threonine-protein kinase 3 [Source:UniProtKB/Swiss-Prot;Acc:Q2V452]
ES	AT4G35110	4	-	16714302	16714398	16713863	16714009	16714882	16714953	1.93512e-13	3.6269e-10	0.463,0.449,0.594	0.0,0.163,0.067	0.425		Arabidopsis phospholipase-like protein (PEARLI 4) family [Source:TAIR;Acc:AT4G35110]
ES	AT1G18730	1	+	6460913	6461069	6460772	6460808	6461173	6461389	2.99316e-13	4.48795e-10	1.0,1.0,1.0	0.333,0.28,0.0	0.796	PNSB4	Photosynthetic NDH subunit of subcomplex B 4, chloroplastic [Source:UniProtKB/Swiss-Prot;Acc:Q8RXS1]
ES	AT4G35110	4	-	16714134	16714398	16713863	16714009	16714882	16714953	6.47482e-13	8.09029e-10	0.171,0.333,0.333	0.014,0.0,0.014	0.27		Arabidopsis phospholipase-like protein (PEARLI 4) family [Source:TAIR;Acc:AT4G35110]
ES	AT5G50950	5	+	20732397	20732521	20732215	20732310	20732633	20732684	7.96363e-13	8.52905e-10	1.0,1.0,1.0	0.451,0.588,0.633	0.443	FUM2	Fumarate hydratase 2, chloroplastic [Source:UniProtKB/Swiss-Prot;Acc:Q9FI53]
ES	AT2G43330	2	+	18002475	18002555	18001656	18001992	18002793	18003087	3.9232e-12	3.30353e-09	0.009,0.055,0.013	0.111,0.107,0.191	-0.111	INT1	Inositol transporter 1 [Source:UniProtKB/Swiss-Prot;Acc:Q8VZR6]
ES	AT5G50950	5	+	20732454	20732521	20732215	20732310	20732633	20732684	1.43653e-11	8.97471e-09	1.0,1.0,1.0	0.779,0.85,0.829	0.181	FUM2	Fumarate hydratase 2, chloroplastic [Source:UniProtKB/Swiss-Prot;Acc:Q9FI53]
ES	AT2G43330	2	+	18002475	18002569	18001656	18001992	18002793	18003087	1.37871e-11	8.97471e-09	0.004,0.046,0.006	0.1,0.098,0.133	-0.092	INT1	Inositol transporter 1 [Source:UniProtKB/Swiss-Prot;Acc:Q8VZR6]
ES	AT4G35110	4	-	16714202	16714398	16713863	16714009	16714882	16714953	1.37013e-11	8.97471e-09	0.261,0.091,0.355	0.0,0.0,0.0	0.236		Arabidopsis phospholipase-like protein (PEARLI 4) family [Source:TAIR;Acc:AT4G35110]
ES	AT1G64060	1	+	23773234	23773364	23772716	23773139	23774048	23774435	1.5534e-10	8.31845e-08	0.036,0.023,0.004	0.107,0.081,0.099	-0.075	RBOHF	Respiratory burst oxidase homolog protein F [Source:UniProtKB/Swiss-Prot;Acc:O48538]
ES	AT2G43330	2	+	18002475	18002566	18001656	18001992	18002793	18003087	2.03217e-10	9.52197e-08	0.005,0.058,0.006	0.112,0.093,0.135	-0.09	INT1	Inositol transporter 1 [Source:UniProtKB/Swiss-Prot;Acc:Q8VZR6]
ES	AT1G64060	1	+	23773234	23773356	23772716	23773139	23774048	23774435	1.99433e-10	9.52197e-08	0.037,0.028,0.004	0.103,0.083,0.117	-0.078	RBOHF	Respiratory burst oxidase homolog protein F [Source:UniProtKB/Swiss-Prot;Acc:O48538]
ES	AT2G39435	2	-	16466645	16466676	16465901	16466539	16466815	16466941	5.72215e-10	2.38327e-07	1.0,1.0,1.0	0.454,0.322,0.0	0.741		Phosphatidylinositol N-acetyglucosaminlytransferase subunit P-related [Source:TAIR;Acc:AT2G39435]
ES	AT3G56210	3	-	20853376	20853418	20852384	20852709	20853492	20854149	1.56191e-09	6.16298e-07	0.249,0.227,0.183	0.394,0.449,0.44	-0.208		ARM repeat superfamily protein [Source:TAIR;Acc:AT3G56210]
ES	AT3G01540	3	-	214922	215134	214519	214789	215400	215469	6.47352e-09	2.4266e-06	0.057,0.062,0.061	0.121,0.12,0.14	-0.067	RH14	DEAD-box ATP-dependent RNA helicase 14 [Source:UniProtKB/Swiss-Prot;Acc:Q8H136]
ES	AT2G26980	2	-	11516426	11516472	11516084	11516207	11516696	11516785	1.55117e-08	5.28596e-06	0.048,0.057,0.05	0.118,0.131,0.12	-0.071	CIPK3	CBL-interacting serine/threonine-protein kinase 3 [Source:UniProtKB/Swiss-Prot;Acc:Q2V452]
ES	AT4G24740	4	-	12756744	12756934	12756526	12756566	12757551	12757786	3.25826e-08	1.01937e-05	0.821,0.837,0.849	0.657,0.646,0.718	0.162	AFC2	Serine/threonine-protein kinase AFC2 [Source:UniProtKB/Swiss-Prot;Acc:P51567]
ES	AT2G22970	2	+	9777722	9777898	9777202	9777324	9778143	9778528	5.14611e-08	1.52894e-05	1.0,1.0,1.0	0.429,0.5,0.0	0.69	SCPL11	Serine carboxypeptidase-like 11 [Source:UniProtKB/Swiss-Prot;Acc:Q2V465]
ES	AT2G28760	2	-	12338739	12338854	12338558	12338644	12338950	12339027	6.0797e-08	1.68813e-05	0.148,0.195,0.242	0.773,0.646,0.675	-0.503	UXS6	UDP-glucuronic acid decarboxylase 6 [Source:UniProtKB/Swiss-Prot;Acc:Q9ZV36]
ES	AT1G66880	1	+	24951434	24952058	24950291	24950846	24953891	24953921	9.9837e-08	2.67313e-05	0.351,0.636,0.583	1.0,1.0,1.0	-0.477		Protein kinase superfamily protein [Source:TAIR;Acc:AT1G66880]
ES	AT1G03080	1	-	737564	737624	737232	737437	737873	738056	1.12323e-07	2.90374e-05	0.957,0.709,0.864	1.0,1.0,1.0	-0.157	NET1D	Protein NETWORKED 1D [Source:UniProtKB/Swiss-Prot;Acc:F4HZB5]
ES	AT5G22640	5	+	7531876	7531896	7531498	7531717	7531987	7532091	1.35814e-07	3.28451e-05	0.0,0.01,0.0	0.036,0.098,0.056	-0.06	TIC100	Protein TIC 100 [Source:UniProtKB/Swiss-Prot;Acc:Q8LPR8]
ES	AT3G01850	3	-	301493	301498	301323	301386	301873	302038	1.34448e-07	3.28451e-05	0.811,0.0,0.574	0.0,0.0,0.0	0.462		Aldolase-type TIM barrel family protein [Source:TAIR;Acc:AT3G01850]
ES	AT4G03115	4	-	1384895	1385007	1384694	1384756	1385123	1385249	1.52336e-07	3.56895e-05	0.033,0.047,0.072	0.375,0.19,0.203	-0.205		Mitochondrial substrate carrier family protein [Source:TAIR;Acc:AT4G03115]
ES	AT1G66880	1	+	24952951	24953677	24950291	24950846	24953891	24953921	2.79409e-07	6.34767e-05	0.684,0.882,0.811	1.0,1.0,1.0	-0.208		Protein kinase superfamily protein [Source:TAIR;Acc:AT1G66880]
ES	AT2G39435	2	-	16466645	16466745	16465901	16466539	16466815	16466941	2.97227e-07	6.55386e-05	1.0,1.0,1.0	0.75,0.507,0.844	0.3		Phosphatidylinositol N-acetyglucosaminlytransferase subunit P-related [Source:TAIR;Acc:AT2G39435]
ES	AT4G24740	4	-	12756744	12756928	12756539	12756566	12757551	12757786	3.63935e-07	7.7955e-05	0.639,0.731,0.724	0.477,0.484,0.481	0.217	AFC2	Serine/threonine-protein kinase AFC2 [Source:UniProtKB/Swiss-Prot;Acc:P51567]
ES	AT1G09932	1	-	3231733	3231811	3231562	3231632	3232016	3232137	4.9609e-07	0.000103311	0.769,0.737,0.77	1.0,1.0,1.0	-0.241		Phosphoglycerate mutase family protein [Source:TAIR;Acc:AT1G09932]
ES	AT4G29900	4	-	14618980	14619074	14618631	14618814	14619402	14619573	6.03037e-07	0.000122188	0.092,0.101,0.11	0.059,0.0,0.044	0.067	ACA10	Calcium-transporting ATPase 10, plasma membrane-type [Source:UniProtKB/Swiss-Prot;Acc:Q9SZR1]
ES	AT5G52070	5	+	21162095	21162208	21161310	21161353	21163726	21163951	6.39584e-07	0.000126183	0.919,1.0,1.0	0.8,0.753,0.741	0.208		Agenet domain-containing protein [Source:TAIR;Acc:AT5G52070]
ES	AT5G48220	5	+	19550131	19550226	19549675	19550055	19550375	19550789	6.64281e-07	0.000127695	0.099,0.082,0.028	0.145,0.172,0.168	-0.092		Aldolase-type TIM barrel family protein [Source:TAIR;Acc:AT5G48220]
ES	AT2G39435	2	-	16466645	16466691	16465901	16466539	16466815	16466941	9.78382e-07	0.000183373	1.0,1.0,1.0	0.754,0.606,0.925	0.238		Phosphatidylinositol N-acetyglucosaminlytransferase subunit P-related [Source:TAIR;Acc:AT2G39435]
ES	AT1G05900	1	+	1787785	1787910	1787616	1787688	1788221	1788285	1.23779e-06	0.000226335	0.887,1.0,1.0	0.756,0.828,0.753	0.183	NTH2	Endonuclease III homolog 2, chloroplastic [Source:UniProtKB/Swiss-Prot;Acc:B9DFZ0]
ES	AT5G48220	5	+	19550192	19550226	19549675	19550055	19550375	19550789	1.51294e-06	0.000263779	0.031,0.006,0.005	0.045,0.077,0.089	-0.056		Aldolase-type TIM barrel family protein [Source:TAIR;Acc:AT5G48220]
ES	AT2G37150	2	-	15607694	15607840	15605888	15605993	15608306	15608454	2.39823e-06	0.000390859	0.058,0.013,0.048	0.196,0.165,0.187	-0.143		RING/U-box superfamily protein [Source:TAIR;Acc:AT2G37150]
ES	AT2G04039	2	+	1334124	1334202	1333639	1333983	1334283	1334566	2.34718e-06	0.000390859	0.974,0.939,0.881	1.0,0.992,0.992	-0.063		unknown protein; FUNCTIONS IN: molecular_function unknown; LOCATED IN: chloroplast; EXPRESSED IN: 21 plant structures; EXPRESSED DURING: 13 growth stages; CONTAINS InterPro DOMAIN/s: Protein of unknown function DUF2996 (InterPro:IPR021374); Has 159 /.../hits to 159 proteins in 52 species: Archae - 0; Bacteria - 76; Metazoa - 0; Fungi - 0; Plants - 38; Viruses - 0; Other Eukaryotes - 45 (source: N…
ES	AT4G14520	4	+	8341935	8342045	8341334	8341478	8342453	8343234	2.82815e-06	0.00045112	0.046,0.046,0.06	0.17,0.218,0.195	-0.144	NRPB7L	DNA-directed RNA polymerase subunit 7-like protein [Source:UniProtKB/Swiss-Prot;Acc:Q6NML5]
ES	AT2G43080	2	+	17916111	17916196	17915988	17916036	17916307	17916364	3.14754e-06	0.000477604	0.05,0.044,0.038	0.084,0.153,0.122	-0.076	P4H1	Prolyl 4-hydroxylase 1 [Source:UniProtKB/Swiss-Prot;Acc:Q9ZW86]
ES	AT3G02300	3	+	462873	462954	462587	462786	463031	463463	3.19505e-06	0.000477604	0.099,0.13,0.024	0.223,0.467,0.245	-0.227		Regulator of chromosome condensation (RCC1) family protein [Source:TAIR;Acc:AT3G02300]
ES	AT3G62750	3	+	23214880	23214944	23214746	23214796	23215039	23215111	3.24901e-06	0.000477604	0.849,0.858,0.701	1.0,1.0,0.961	-0.184	BGLU8	Beta-glucosidase 8 [Source:UniProtKB/Swiss-Prot;Acc:Q67XN2]
ES	AT4G35110	4	-	16714331	16714398	16713863	16714009	16714882	16714953	3.15571e-06	0.000477604	0.075,0.217,0.257	0.0,0.059,0.0	0.163		Arabidopsis phospholipase-like protein (PEARLI 4) family [Source:TAIR;Acc:AT4G35110]
ES	AT4G03115	4	-	1384895	1385003	1384694	1384756	1385123	1385249	3.40664e-06	0.000491146	0.017,0.0,0.05	0.225,0.117,0.061	-0.112		Mitochondrial substrate carrier family protein [Source:TAIR;Acc:AT4G03115]
ES	AT2G16940	2	-	7346107	7346177	7345556	7345776	7346570	7347075	3.49116e-06	0.000493834	0.192,0.178,0.146	0.309,0.311,0.343	-0.149		Splicing factor, CC1-like [Source:TAIR;Acc:AT2G16940]
[truncated: 710 more rows]
[truncated: 2 more columns]
