# Supplementary material for: Receptor kinase FERONIA regulates flowering time in Arabidopsis
Source: BMC Plant Biol. 2020 Jan 16;20:26. doi: 10.1186/s12870-019-2223-y (PMC6966814; doi:10.1186/s12870-019-2223-y)
Supplement: Supplementary file 12 — Additional file 12: Table S4. Flowering relate genes with alternative splicing events in fer-4 plant as determined by RNA-seq analysis. [file 12870_2019_2223_MOESM12_ESM.xls]

## Sheet: fer-4 AS flowering-related
Flowering relate genes with alternative splicing events in fer-4 plant as determined by RNA-seq analysis
AS Type	chr	GeneID	longExonStart_0baES	longExonEnd	shortES	shortEE	flankingES	flankingEE	PValue	IncLevelDifference	fer-4 IncLevel	Col-0 IncLevel	Gene name
A3SS	1	AT1G79280	29827914	29828016	29827914	29827958	29828408	29828487	2.79e-12	-0.766	0.266,0.194,0.094	0.853,1.0,1.0	NUA
A3SS	4	AT4G02560	1126392	1126527	1126392	1126509	1126619	1126713	2.99e-05	0.509	1.0,0.89,1.0	0.519,0.0,0.843	LD
A3SS	1	AT1G79280	29827914	29827964	29827914	29827958	29828408	29828487	0.000148031	-0.069	0.959,0.943,0.874	0.983,1.0,1.0	NUA
A3SS	2	AT2G32700	13867192	13867438	13867214	13867438	13866771	13866926	0.000742433	0.193	1.0,0.637,1.0	0.754,0.305,1.0	LUH
A3SS	4	AT4G02560	1126392	1126522	1126392	1126509	1126619	1126713	0.00136387	0.089	1.0,0.97,1.0	0.828,0.923,0.951	LD
A3SS	5	AT5G65060	25990083	25990183	25990121	25990183	25989941	25990003	0.00136621	0.183	0.506,0.4,0.368	0.243,0.189,0.293	MAF3
A3SS	3	AT3G54610	20216861	20216968	20216874	20216968	20216646	20216765	0.00154477	0.089	0.134,0.0,0.134	0.0,0.0,0.0	HAG1
A3SS	2	AT2G32700	13867192	13867266	13867211	13867266	13866771	13866926	0.00195263	-0.249	0.853,1.0,0.401	1.0,1.0,1.0	LUH
A3SS	5	AT5G42400	16958222	16958480	16958222	16958469	16958585	16958936	0.00236689	0.187	0.899,0.753,1.0	0.584,0.652,0.854	SDG25
A3SS	2	AT2G32700	13867128	13867266	13867214	13867266	13866771	13866926	0.00323194	0.088	1.0,0.0,1.0	0.56,0.175,1.0	MUM1
A3SS	5	AT5G23150	7789840	7789971	7789858	7789971	7789538	7789647	0.00733212	0.108	0.098,0.096,0.31	0.024,0.097,0.06	MYJ24.14
A3SS	5	AT5G13480	4329570	4329634	4329570	4329630	4329948	4330046	0.00761195	-0.134	0.131,0.0,0.113	0.189,0.357,0.101	FY
A3SS	2	AT2G32700	13867128	13867266	13867192	13867266	13866771	13866926	0.00896628	-0.208	0.06,0.0,0.319	0.26,0.26,0.484	MUM1
A3SS	2	AT2G20570	8857144	8857256	8857150	8857256	8857002	8857044	0.018034	-0.058	0.617,0.914,1.0	0.853,0.853,1.0	GLK1
A3SS	3	AT3G19980	6963069	6963222	6963072	6963222	6962917	6962975	0.0234252	-0.199	0.0,0.0,0.0	0.597,0.0,0.0	ATFYPP3
A3SS	5	AT5G08230	2641393	2641635	2641393	2641629	2642237	2642334	0.0279347	-0.169	0.492,1.0,1.0	1.0,1.0,1.0	HULK1
A3SS	5	AT5G51230	20827831	20828071	20827867	20828071	20827598	20827684	0.0310711	0.127	1.0,1.0,1.0	1.0,0.829,0.791	EMF2
AS Type	chr	GeneID	longExonStart_0baES	longExonEnd	shortES	shortEE	flankingES	flankingEE	PValue	IncLevelDifference	fer-4 IncLevel	Col-0 IncLevel
A5SS	1	AT1G72560	27324957	27325115	27324982	27325115	27324388	27324871	1.57e-05	-0.207	0.19,0.0,0.0	0.35,0.246,0.215	PSD
A5SS	5	AT5G56030	22686801	22687132	22686801	22687031	22687350	22687492	4.84e-05	-0.122	1.0,0.633,1.0	1.0,1.0,1.0	HSP81-2
A5SS	1	AT1G53160	19806854	19807301	19806854	19807023	19807342	19807608	8.95e-05	-0.413	1.0,0.333,0.429	1.0,1.0,1.0	SPL4
A5SS	1	AT1G53160	19806854	19807087	19806854	19807023	19807342	19807608	0.000135464	-0.409	1.0,0.26,0.513	1.0,1.0,1.0	SPL4
A5SS	5	AT5G42400	16956069	16956270	16956090	16956270	16955576	16955986	0.000417195	0.217	0.306,0.335,0.138	0.0,0.128,0.0	SDG25
A5SS	1	AT1G72560	27324957	27325115	27324991	27325115	27324388	27324871	0.000716433	-0.246	0.38,0.0,0.12	0.43,0.551,0.256	PSD
A5SS	1	AT1G16710	5715375	5715651	5715375	5715520	5715723	5716316	0.00575293	-0.241	0.411,0.562,0.621	0.651,0.851,0.815	HAC12
A5SS	3	AT3G12810	4067642	4067711	4067642	4067704	4067792	4067915	0.00943222	-0.274	0.249,0.402,0.335	0.823,0.369,0.616	PIE1
A5SS	2	AT2G36740	15407394	15407512	15407446	15407512	15407046	15407261	0.00988349	-0.059	0.0,0.0,0.019	0.014,0.162,0.019	SWC2
A5SS	2	AT2G32700	13866771	13867128	13866771	13866926	13867214	13867266	0.0102424	0.055	1.0,0.972,1.0	0.953,0.855,1.0	LUH
A5SS	1	AT1G77080	28958333	28958501	28958333	28958391	28958601	28958844	0.013789	-0.113	0.22,0.249,0.222	0.228,0.361,0.441	MAF1
A5SS	5	AT5G02600	585100	585846	585716	585846	584161	584489	0.0439106	0.137	0.727,1.0,0.905	0.769,0.825,0.627	NAKR1
A5SS	1	AT1G17110	5848199	5848339	5848211	5848339	5848030	5848119	0.0468109	-0.087	0.258,0.296,0.237	0.369,0.284,0.398	UPB15
A5SS	4	AT4G03090	1367825	1367892	1367831	1367892	1367185	1367656	0.047262	0.066	0.804,0.948,1.0	0.871,0.683,1.0	NDX
AS Type	chr	GeneID	exonStart_0baES	exonEnd	upstreamES	upstreamEE	downstreamES	downstreamEE	PValue	IncLevelDifference	fer-4 IncLevel	Col-0 IncLevel
ES	1	AT1G77080	28958455	28958501	28958310	28958391	28958601	28958844	8.3e-05	-0.085	0.037,0.023,0.091	0.079,0.141,0.186	MAF1
ES	1	AT1G17110	5850458	5850539	5849440	5850045	5850641	5850934	0.000274245	-0.053	0.014,0.035,0.049	0.087,0.055,0.116	UBP15
ES	2	AT2G32700	13867084	13867128	13866771	13866926	13867214	13867266	0.0019743	0.156	1.0,0.925,1.0	0.918,0.538,1.0	LUH
ES	5	AT5G11530	3696393	3696412	3695861	3696165	3697058	3697234	0.00441923	-0.063	0.0,0.0,0.0	0.021,0.103,0.064	EMF1
ES	5	AT5G65050	25985653	25985686	25985121	25985344	25986012	25986326	0.0138257	0.076	0.884,1.0,1.0	1.0,0.924,0.733	MAF2
ES	5	AT5G45190	18279996	18280078	18279521	18279656	18280506	18280765	0.0155789	-0.056	0.874,0.875,0.96	0.94,0.959,0.978
ES	5	AT5G65050	25985653	25985925	25985152	25985344	25986012	25986326	0.0174184	0.096	0.852,1.0,1.0	1.0,0.897,0.667	MAF2
ES	5	AT5G08450	2730453	2730549	2729851	2730027	2730905	2732642	0.0329168	0.268	1.0,1.0,1.0	1.0,1.0,0.196	HDC1
ES	5	AT5G08450	2730379	2730461	2729851	2730027	2730905	2732642	0.0392839	0.22	1.0,1.0,1.0	1.0,1.0,0.341	HDC1
ES	5	AT5G08450	2730393	2730461	2729851	2730027	2730905	2732642	0.0410584	0.215	1.0,1.0,1.0	1.0,1.0,0.356	HDC1
AS Type	chr	GeneID	riExonStart_0base	riExonEnd	upstreamES	upstreamEE	downstreamES	downstreamEE	PValue	IncLevelDifference	fer-4 IncLevel	Col-0 IncLevel
RI	3	AT3G06400	1945445	1945656	1945445	1945507	1945597	1945656	0.000253652	-0.063	0.06,0.0,0.0	0.101,0.051,0.096	CHR11
RI	5	AT5G13480	4329974	4330189	4329974	4330032	4330117	4330189	0.000736563	-0.203	1.0,0.0,0.39	0.0,1.0,1.0	FY
RI	3	AT3G23980	8663983	8664228	8663983	8664086	8664173	8664228	0.00136306	0.287	0.851,0.851,1.0	0.74,0.613,0.487	BLI
RI	5	AT5G51230	20827453	20827620	20827453	20827500	20827582	20827620	0.0258351	-0.667	0.0,0.0,0.0	1.0,0.0,1.0	EMF2
AS Type	chr	GeneID	1stExonStart_0base	1stExonEnd	2ndExonStart_0base	2ndExonEnd	upstreamES	upstreamEE	PValue	IncLevelDifference	fer-4 IncLevel	Col-0 IncLevel
MXE	1	AT1G77080	28958310	28958391	28958460	28958501	28955636	28955863	0.0119927	0.197	0.788,0.868,0.655	0.688,0.553,0.478	MAF1
MXE	1	AT1G77080	28958333	28958391	28958455	28958501	28955636	28955863	0.0474765	0.054	0.812,0.799,0.829	0.811,0.725,0.741	MAF1
